# Supplementary material for: Systematic analysis of adverse reaction signals induced by Leflunomide, Upadacitinib, and Baricitinib in the treatment of rheumatoid arthritis using the FAERS database
Source: Research Square preprint supplement (doi:10.21203/rs.3.rs-7331453/v1), 2025-08-21
Supplement: Supplementary file 1 [file 20459a460ce6c9099074c41a.xlsx]

## Sheet: Sheet1
pt_name	soc_name	Case number	ROR(95%Cl)	PRR(χ2)
DRUG INEFFECTIVE	GENERAL DISORDERS AND ADMINISTRATION SITE CONDITIONS	4556	1.66 ( 1.61 - 1.71 )	1.63 ( 1090.38 )
RHEUMATOID ARTHRITIS	MUSCULOSKELETAL AND CONNECTIVE TISSUE DISORDERS	2819	1.36 ( 1.31 - 1.42 )	1.35 ( 254.63 )
DRUG INTOLERANCE	GENERAL DISORDERS AND ADMINISTRATION SITE CONDITIONS	1800	3.97 ( 3.78 - 4.17 )	3.92 ( 3544.83 )
PAIN	GENERAL DISORDERS AND ADMINISTRATION SITE CONDITIONS	1748	0.94 ( 0.9 - 0.99 )	0.94 ( 6.31 )
JOINT SWELLING	MUSCULOSKELETAL AND CONNECTIVE TISSUE DISORDERS	1677	1.61 ( 1.53 - 1.69 )	1.6 ( 365.13 )
ARTHRALGIA	MUSCULOSKELETAL AND CONNECTIVE TISSUE DISORDERS	1596	0.79 ( 0.75 - 0.83 )	0.79 ( 89.82 )
FATIGUE	GENERAL DISORDERS AND ADMINISTRATION SITE CONDITIONS	1427	1.22 ( 1.15 - 1.28 )	1.21 ( 52.13 )
RASH	SKIN AND SUBCUTANEOUS TISSUE DISORDERS	1418	1.97 ( 1.87 - 2.08 )	1.96 ( 636.32 )
CONTRAINDICATED PRODUCT ADMINISTERED	INJURY, POISONING AND PROCEDURAL COMPLICATIONS	1386	4.46 ( 4.21 - 4.71 )	4.4 ( 3261.41 )
DIARRHOEA	GASTROINTESTINAL DISORDERS	999	1.67 ( 1.57 - 1.78 )	1.67 ( 256.15 )
NAUSEA	GASTROINTESTINAL DISORDERS	978	1.2 ( 1.13 - 1.28 )	1.2 ( 32.06 )
ALOPECIA	SKIN AND SUBCUTANEOUS TISSUE DISORDERS	977	2.17 ( 2.03 - 2.32 )	2.16 ( 575.62 )
OFF LABEL USE	INJURY, POISONING AND PROCEDURAL COMPLICATIONS	959	1.39 ( 1.3 - 1.48 )	1.38 ( 99.4 )
ABDOMINAL DISCOMFORT	GASTROINTESTINAL DISORDERS	943	2.36 ( 2.21 - 2.52 )	2.35 ( 688.15 )
CONDITION AGGRAVATED	GENERAL DISORDERS AND ADMINISTRATION SITE CONDITIONS	928	1.33 ( 1.25 - 1.42 )	1.33 ( 73.4 )
PERIPHERAL SWELLING	GENERAL DISORDERS AND ADMINISTRATION SITE CONDITIONS	912	1.52 ( 1.43 - 1.63 )	1.52 ( 156.04 )
SYNOVITIS	MUSCULOSKELETAL AND CONNECTIVE TISSUE DISORDERS	907	3.33 ( 3.11 - 3.57 )	3.31 ( 1341.92 )
SWELLING	GENERAL DISORDERS AND ADMINISTRATION SITE CONDITIONS	887	2.12 ( 1.98 - 2.26 )	2.1 ( 488.08 )
THERAPEUTIC PRODUCT EFFECT DECREASED	GENERAL DISORDERS AND ADMINISTRATION SITE CONDITIONS	871	3.33 ( 3.11 - 3.57 )	3.31 ( 1289.02 )
TREATMENT FAILURE	GENERAL DISORDERS AND ADMINISTRATION SITE CONDITIONS	869	2.69 ( 2.51 - 2.88 )	2.67 ( 850.92 )
ARTHROPATHY	MUSCULOSKELETAL AND CONNECTIVE TISSUE DISORDERS	868	1.84 ( 1.72 - 1.97 )	1.84 ( 316.16 )
HYPERSENSITIVITY	IMMUNE SYSTEM DISORDERS	855	2.07 ( 1.93 - 2.22 )	2.06 ( 443.16 )
DRUG HYPERSENSITIVITY	IMMUNE SYSTEM DISORDERS	794	1.98 ( 1.84 - 2.13 )	1.97 ( 362.86 )
HEPATIC ENZYME INCREASED	INVESTIGATIONS	742	2.58 ( 2.4 - 2.78 )	2.57 ( 665.75 )
INFECTION	INFECTIONS AND INFESTATIONS	718	1.36 ( 1.26 - 1.47 )	1.36 ( 66.33 )
HEADACHE	NERVOUS SYSTEM DISORDERS	667	0.68 ( 0.63 - 0.74 )	0.68 ( 96.26 )
DYSPNOEA	RESPIRATORY, THORACIC AND MEDIASTINAL DISORDERS	662	1.13 ( 1.05 - 1.22 )	1.13 ( 9.48 )
SYSTEMIC LUPUS ERYTHEMATOSUS	MUSCULOSKELETAL AND CONNECTIVE TISSUE DISORDERS	626	2.23 ( 2.06 - 2.42 )	2.23 ( 398.99 )
PYREXIA	GENERAL DISORDERS AND ADMINISTRATION SITE CONDITIONS	618	1.16 ( 1.07 - 1.26 )	1.16 ( 13.14 )
PRURITUS	SKIN AND SUBCUTANEOUS TISSUE DISORDERS	614	1.42 ( 1.31 - 1.54 )	1.42 ( 73.31 )
PEMPHIGUS	SKIN AND SUBCUTANEOUS TISSUE DISORDERS	583	3.12 ( 2.87 - 3.4 )	3.11 ( 769.37 )
VOMITING	GASTROINTESTINAL DISORDERS	571	1.27 ( 1.17 - 1.39 )	1.27 ( 32.48 )
GASTROINTESTINAL DISORDER	GASTROINTESTINAL DISORDERS	558	3.01 ( 2.76 - 3.28 )	3 ( 688.01 )
HAND DEFORMITY	MUSCULOSKELETAL AND CONNECTIVE TISSUE DISORDERS	552	2.54 ( 2.33 - 2.77 )	2.53 ( 479.78 )
GLOSSODYNIA	GASTROINTESTINAL DISORDERS	546	2.93 ( 2.69 - 3.2 )	2.92 ( 638.85 )
MUSCULOSKELETAL STIFFNESS	MUSCULOSKELETAL AND CONNECTIVE TISSUE DISORDERS	544	1.05 ( 0.96 - 1.14 )	1.05 ( 1.16 )
PAIN IN EXTREMITY	MUSCULOSKELETAL AND CONNECTIVE TISSUE DISORDERS	532	0.49 ( 0.45 - 0.54 )	0.5 ( 269.87 )
PNEUMONIA	INFECTIONS AND INFESTATIONS	517	0.7 ( 0.64 - 0.77 )	0.7 ( 63.72 )
LOWER RESPIRATORY TRACT INFECTION	INFECTIONS AND INFESTATIONS	517	2.14 ( 1.96 - 2.34 )	2.13 ( 294.41 )
NASOPHARYNGITIS	INFECTIONS AND INFESTATIONS	504	0.66 ( 0.6 - 0.72 )	0.66 ( 88.62 )
SINUSITIS	INFECTIONS AND INFESTATIONS	493	0.85 ( 0.78 - 0.93 )	0.85 ( 12.84 )
MALAISE	GENERAL DISORDERS AND ADMINISTRATION SITE CONDITIONS	488	0.62 ( 0.57 - 0.68 )	0.63 ( 107.85 )
INFUSION RELATED REACTION	INJURY, POISONING AND PROCEDURAL COMPLICATIONS	466	1.52 ( 1.39 - 1.67 )	1.52 ( 79.92 )
ALANINE AMINOTRANSFERASE INCREASED	INVESTIGATIONS	459	8.03 ( 7.26 - 8.89 )	8 ( 2302.71 )
WEIGHT INCREASED	INVESTIGATIONS	448	1.24 ( 1.13 - 1.36 )	1.24 ( 19.57 )
STOMATITIS	GASTROINTESTINAL DISORDERS	440	2.62 ( 2.38 - 2.89 )	2.62 ( 410.12 )
IMPAIRED HEALING	GENERAL DISORDERS AND ADMINISTRATION SITE CONDITIONS	436	2.27 ( 2.06 - 2.5 )	2.26 ( 290.42 )
LOSS OF PERSONAL INDEPENDENCE IN DAILY ACTIVITIES	SOCIAL CIRCUMSTANCES	427	2.17 ( 1.97 - 2.39 )	2.16 ( 252.57 )
BLISTER	SKIN AND SUBCUTANEOUS TISSUE DISORDERS	420	2.58 ( 2.33 - 2.84 )	2.57 ( 376.37 )
PRODUCT USE ISSUE	INJURY, POISONING AND PROCEDURAL COMPLICATIONS	413	1.69 ( 1.53 - 1.87 )	1.69 ( 111.35 )
WOUND	INJURY, POISONING AND PROCEDURAL COMPLICATIONS	404	2.03 ( 1.84 - 2.25 )	2.03 ( 199.2 )
ASPARTATE AMINOTRANSFERASE INCREASED	INVESTIGATIONS	397	8.68 ( 7.78 - 9.69 )	8.65 ( 2167.24 )
MATERNAL EXPOSURE DURING PREGNANCY	INJURY, POISONING AND PROCEDURAL COMPLICATIONS	396	2.24 ( 2.02 - 2.48 )	2.24 ( 255.28 )
ASTHENIA	GENERAL DISORDERS AND ADMINISTRATION SITE CONDITIONS	385	0.95 ( 0.86 - 1.05 )	0.95 ( 0.97 )
HYPERTENSION	VASCULAR DISORDERS	381	1.05 ( 0.95 - 1.17 )	1.05 ( 1 )
INSOMNIA	PSYCHIATRIC DISORDERS	381	1.47 ( 1.33 - 1.63 )	1.47 ( 55.55 )
IRRITABLE BOWEL SYNDROME	GASTROINTESTINAL DISORDERS	379	3.82 ( 3.43 - 4.24 )	3.8 ( 709.78 )
ANTI-CYCLIC CITRULLINATED PEPTIDE ANTIBODY POSITIVE	INVESTIGATIONS	374	3.12 ( 2.81 - 3.47 )	3.12 ( 495.16 )
C-REACTIVE PROTEIN INCREASED	INVESTIGATIONS	373	2.52 ( 2.27 - 2.8 )	2.51 ( 317.4 )
DISCOMFORT	GENERAL DISORDERS AND ADMINISTRATION SITE CONDITIONS	373	2.13 ( 1.92 - 2.36 )	2.12 ( 210.05 )
CONFUSIONAL STATE	PSYCHIATRIC DISORDERS	371	2.5 ( 2.25 - 2.78 )	2.49 ( 310.95 )
MOBILITY DECREASED	MUSCULOSKELETAL AND CONNECTIVE TISSUE DISORDERS	365	1.06 ( 0.95 - 1.17 )	1.06 ( 1.14 )
ILL-DEFINED DISORDER	GENERAL DISORDERS AND ADMINISTRATION SITE CONDITIONS	355	2.63 ( 2.36 - 2.93 )	2.62 ( 332.68 )
THERAPEUTIC PRODUCT EFFECT INCOMPLETE	GENERAL DISORDERS AND ADMINISTRATION SITE CONDITIONS	352	1.85 ( 1.66 - 2.06 )	1.85 ( 130.12 )
PERICARDITIS	CARDIAC DISORDERS	350	2.61 ( 2.34 - 2.91 )	2.61 ( 323.77 )
FOLLICULITIS	INFECTIONS AND INFESTATIONS	350	3.93 ( 3.52 - 4.39 )	3.92 ( 686.58 )
ABDOMINAL PAIN UPPER	GASTROINTESTINAL DISORDERS	324	1.23 ( 1.1 - 1.37 )	1.23 ( 13.31 )
BACK PAIN	MUSCULOSKELETAL AND CONNECTIVE TISSUE DISORDERS	323	0.7 ( 0.62 - 0.78 )	0.7 ( 42.09 )
MUSCLE INJURY	INJURY, POISONING AND PROCEDURAL COMPLICATIONS	321	4.23 ( 3.77 - 4.75 )	4.22 ( 706.13 )
C-REACTIVE PROTEIN ABNORMAL	INVESTIGATIONS	316	3.47 ( 3.09 - 3.89 )	3.46 ( 504.68 )
GAIT DISTURBANCE	GENERAL DISORDERS AND ADMINISTRATION SITE CONDITIONS	310	0.72 ( 0.65 - 0.81 )	0.73 ( 31.62 )
URTICARIA	SKIN AND SUBCUTANEOUS TISSUE DISORDERS	301	1.26 ( 1.13 - 1.42 )	1.26 ( 16.07 )
EXPOSURE DURING PREGNANCY	INJURY, POISONING AND PROCEDURAL COMPLICATIONS	282	4.33 ( 3.83 - 4.9 )	4.32 ( 643.92 )
GENERAL PHYSICAL HEALTH DETERIORATION	GENERAL DISORDERS AND ADMINISTRATION SITE CONDITIONS	278	1.73 ( 1.53 - 1.95 )	1.73 ( 81.33 )
RHEUMATOID FACTOR POSITIVE	INVESTIGATIONS	273	2.77 ( 2.45 - 3.13 )	2.76 ( 285.6 )
DIZZINESS	NERVOUS SYSTEM DISORDERS	269	0.57 ( 0.51 - 0.65 )	0.57 ( 84.59 )
HELICOBACTER INFECTION	INFECTIONS AND INFESTATIONS	264	2.61 ( 2.31 - 2.96 )	2.61 ( 244.45 )
WEIGHT DECREASED	INVESTIGATIONS	256	0.71 ( 0.63 - 0.8 )	0.71 ( 30.12 )
DUODENAL ULCER PERFORATION	GASTROINTESTINAL DISORDERS	244	2.66 ( 2.34 - 3.03 )	2.66 ( 235.46 )
INFLAMMATION	GENERAL DISORDERS AND ADMINISTRATION SITE CONDITIONS	241	0.96 ( 0.84 - 1.09 )	0.96 ( 0.41 )
OSTEOARTHRITIS	MUSCULOSKELETAL AND CONNECTIVE TISSUE DISORDERS	239	0.81 ( 0.71 - 0.92 )	0.81 ( 10.34 )
SLEEP DISORDER DUE TO GENERAL MEDICAL CONDITION, INSOMNIA TYPE	PSYCHIATRIC DISORDERS	237	3.48 ( 3.04 - 3.97 )	3.47 ( 380.46 )
ARTHRITIS	MUSCULOSKELETAL AND CONNECTIVE TISSUE DISORDERS	235	0.68 ( 0.59 - 0.77 )	0.68 ( 35.8 )
INTERSTITIAL LUNG DISEASE	RESPIRATORY, THORACIC AND MEDIASTINAL DISORDERS	230	1.85 ( 1.62 - 2.11 )	1.84 ( 84.69 )
CONTUSION	INJURY, POISONING AND PROCEDURAL COMPLICATIONS	228	0.84 ( 0.74 - 0.96 )	0.84 ( 6.55 )
ABDOMINAL PAIN	GASTROINTESTINAL DISORDERS	226	1.02 ( 0.9 - 1.17 )	1.02 ( 0.13 )
RED BLOOD CELL SEDIMENTATION RATE INCREASED	INVESTIGATIONS	224	2.25 ( 1.97 - 2.58 )	2.25 ( 146.3 )
THERAPEUTIC RESPONSE DECREASED	GENERAL DISORDERS AND ADMINISTRATION SITE CONDITIONS	221	1.48 ( 1.3 - 1.7 )	1.48 ( 33.24 )
SLEEP DISORDER	PSYCHIATRIC DISORDERS	214	1.9 ( 1.65 - 2.18 )	1.9 ( 86.18 )
FALL	INJURY, POISONING AND PROCEDURAL COMPLICATIONS	207	0.34 ( 0.3 - 0.39 )	0.34 ( 264.66 )
MUSCULOSKELETAL PAIN	MUSCULOSKELETAL AND CONNECTIVE TISSUE DISORDERS	206	0.79 ( 0.68 - 0.9 )	0.79 ( 11.69 )
BLOOD ALKALINE PHOSPHATASE INCREASED	INVESTIGATIONS	200	16.4 ( 13.88 - 19.39 )	16.37 ( 1985.8 )
COUGH	RESPIRATORY, THORACIC AND MEDIASTINAL DISORDERS	198	0.35 ( 0.3 - 0.4 )	0.35 ( 239.61 )
HEPATOTOXICITY	HEPATOBILIARY DISORDERS	196	7.09 ( 6.08 - 8.26 )	7.07 ( 854.99 )
LEUKOPENIA	BLOOD AND LYMPHATIC SYSTEM DISORDERS	195	3.79 ( 3.27 - 4.4 )	3.79 ( 362.33 )
ADVERSE DRUG REACTION	GENERAL DISORDERS AND ADMINISTRATION SITE CONDITIONS	191	1.62 ( 1.4 - 1.87 )	1.62 ( 43.31 )
FIBROMYALGIA	MUSCULOSKELETAL AND CONNECTIVE TISSUE DISORDERS	186	1.26 ( 1.09 - 1.45 )	1.26 ( 9.36 )
INTENTIONAL PRODUCT USE ISSUE	INJURY, POISONING AND PROCEDURAL COMPLICATIONS	185	1.37 ( 1.18 - 1.58 )	1.37 ( 17.57 )
LIVER DISORDER	HEPATOBILIARY DISORDERS	184	1.81 ( 1.56 - 2.1 )	1.81 ( 63.58 )
HYPOAESTHESIA	NERVOUS SYSTEM DISORDERS	173	0.61 ( 0.53 - 0.71 )	0.61 ( 42.19 )
WHITE BLOOD CELL COUNT DECREASED	INVESTIGATIONS	172	1.69 ( 1.45 - 1.97 )	1.69 ( 45.96 )
BLOOD CHOLESTEROL INCREASED	INVESTIGATIONS	171	1.02 ( 0.87 - 1.18 )	1.02 ( 0.05 )
GAMMA-GLUTAMYLTRANSFERASE INCREASED	INVESTIGATIONS	169	13.17 ( 11.04 - 15.71 )	13.15 ( 1390.38 )
DECREASED APPETITE	METABOLISM AND NUTRITION DISORDERS	167	0.89 ( 0.76 - 1.03 )	0.89 ( 2.32 )
RED BLOOD CELL SEDIMENTATION RATE ABNORMAL	INVESTIGATIONS	164	3.79 ( 3.23 - 4.45 )	3.79 ( 304.58 )
KNEE ARTHROPLASTY	SURGICAL AND MEDICAL PROCEDURES	161	0.93 ( 0.79 - 1.08 )	0.93 ( 0.93 )
ANAEMIA	BLOOD AND LYMPHATIC SYSTEM DISORDERS	160	0.95 ( 0.81 - 1.11 )	0.95 ( 0.41 )
PULMONARY FIBROSIS	RESPIRATORY, THORACIC AND MEDIASTINAL DISORDERS	159	1.45 ( 1.24 - 1.7 )	1.45 ( 21.63 )
DYSPEPSIA	GASTROINTESTINAL DISORDERS	158	1.33 ( 1.13 - 1.56 )	1.33 ( 12.32 )
ADVERSE EVENT	GENERAL DISORDERS AND ADMINISTRATION SITE CONDITIONS	158	1.36 ( 1.16 - 1.59 )	1.36 ( 14.19 )
ERYTHEMA	SKIN AND SUBCUTANEOUS TISSUE DISORDERS	155	0.59 ( 0.5 - 0.69 )	0.59 ( 42.85 )
LIVER FUNCTION TEST ABNORMAL	INVESTIGATIONS	155	2.85 ( 2.42 - 3.36 )	2.85 ( 172.6 )
RHEUMATOID NODULE	MUSCULOSKELETAL AND CONNECTIVE TISSUE DISORDERS	153	2.59 ( 2.2 - 3.05 )	2.59 ( 139.3 )
OSTEOPOROSIS	MUSCULOSKELETAL AND CONNECTIVE TISSUE DISORDERS	153	1.37 ( 1.16 - 1.61 )	1.37 ( 14.55 )
PSORIATIC ARTHROPATHY	MUSCULOSKELETAL AND CONNECTIVE TISSUE DISORDERS	149	1.37 ( 1.16 - 1.61 )	1.37 ( 14.21 )
RESPIRATORY DISORDER	RESPIRATORY, THORACIC AND MEDIASTINAL DISORDERS	147	2.35 ( 1.99 - 2.78 )	2.35 ( 106.96 )
RASH PRURITIC	SKIN AND SUBCUTANEOUS TISSUE DISORDERS	146	1.32 ( 1.12 - 1.56 )	1.32 ( 10.9 )
LIVER FUNCTION TEST INCREASED	INVESTIGATIONS	146	1.99 ( 1.68 - 2.35 )	1.99 ( 67.9 )
NIGHT SWEATS	SKIN AND SUBCUTANEOUS TISSUE DISORDERS	145	1.91 ( 1.61 - 2.25 )	1.91 ( 59.27 )
RENAL FAILURE	RENAL AND URINARY DISORDERS	144	1.45 ( 1.22 - 1.71 )	1.45 ( 19.1 )
HEPATITIS	HEPATOBILIARY DISORDERS	143	3.35 ( 2.82 - 3.98 )	3.35 ( 215.48 )
DEPRESSION	PSYCHIATRIC DISORDERS	141	0.62 ( 0.52 - 0.73 )	0.62 ( 33.13 )
PARAESTHESIA	NERVOUS SYSTEM DISORDERS	139	0.67 ( 0.56 - 0.79 )	0.67 ( 22.86 )
JOINT RANGE OF MOTION DECREASED	MUSCULOSKELETAL AND CONNECTIVE TISSUE DISORDERS	139	1.18 ( 0.99 - 1.39 )	1.18 ( 3.54 )
SKIN ULCER	SKIN AND SUBCUTANEOUS TISSUE DISORDERS	137	1.41 ( 1.19 - 1.67 )	1.41 ( 15.68 )
CHEST PAIN	GENERAL DISORDERS AND ADMINISTRATION SITE CONDITIONS	136	0.55 ( 0.46 - 0.65 )	0.55 ( 50.06 )
VISUAL IMPAIRMENT	EYE DISORDERS	136	1.03 ( 0.87 - 1.22 )	1.03 ( 0.13 )
LIVER INJURY	HEPATOBILIARY DISORDERS	134	2.06 ( 1.73 - 2.45 )	2.06 ( 69 )
BODY TEMPERATURE INCREASED	INVESTIGATIONS	133	3.65 ( 3.06 - 4.37 )	3.65 ( 232.52 )
LUNG DISORDER	RESPIRATORY, THORACIC AND MEDIASTINAL DISORDERS	130	0.91 ( 0.76 - 1.08 )	0.91 ( 1.21 )
FEELING ABNORMAL	GENERAL DISORDERS AND ADMINISTRATION SITE CONDITIONS	130	0.53 ( 0.44 - 0.63 )	0.53 ( 53.59 )
EAR PAIN	EAR AND LABYRINTH DISORDERS	130	2.05 ( 1.71 - 2.44 )	2.04 ( 65.61 )
BLOOD LACTATE DEHYDROGENASE INCREASED	INVESTIGATIONS	129	15.19 ( 12.36 - 18.66 )	15.17 ( 1202 )
DRUG-INDUCED LIVER INJURY	HEPATOBILIARY DISORDERS	128	4.13 ( 3.44 - 4.95 )	4.12 ( 271.65 )
HIP ARTHROPLASTY	SURGICAL AND MEDICAL PROCEDURES	128	1.2 ( 1 - 1.43 )	1.2 ( 4.03 )
HERPES ZOSTER	INFECTIONS AND INFESTATIONS	126	0.46 ( 0.39 - 0.55 )	0.46 ( 78.39 )
DIVERTICULITIS	INFECTIONS AND INFESTATIONS	124	1.06 ( 0.89 - 1.27 )	1.06 ( 0.4 )
BLOOD PRESSURE INCREASED	INVESTIGATIONS	122	0.51 ( 0.43 - 0.61 )	0.51 ( 56.44 )
NEUTROPENIA	BLOOD AND LYMPHATIC SYSTEM DISORDERS	119	2.23 ( 1.85 - 2.69 )	2.23 ( 76.08 )
HAEMOGLOBIN DECREASED	INVESTIGATIONS	118	1.47 ( 1.22 - 1.77 )	1.47 ( 17.15 )
JOINT STIFFNESS	MUSCULOSKELETAL AND CONNECTIVE TISSUE DISORDERS	117	0.61 ( 0.51 - 0.73 )	0.61 ( 28.52 )
MUSCULAR WEAKNESS	MUSCULOSKELETAL AND CONNECTIVE TISSUE DISORDERS	115	0.74 ( 0.61 - 0.89 )	0.74 ( 10.65 )
BONE EROSION	MUSCULOSKELETAL AND CONNECTIVE TISSUE DISORDERS	115	2.52 ( 2.08 - 3.04 )	2.51 ( 98.07 )
TYPE 2 DIABETES MELLITUS	METABOLISM AND NUTRITION DISORDERS	114	1.42 ( 1.18 - 1.71 )	1.42 ( 13.49 )
SEPSIS	INFECTIONS AND INFESTATIONS	112	0.69 ( 0.57 - 0.83 )	0.69 ( 15.09 )
PULMONARY EMBOLISM	RESPIRATORY, THORACIC AND MEDIASTINAL DISORDERS	110	1.22 ( 1.01 - 1.48 )	1.22 ( 4.23 )
PRODUCT USE IN UNAPPROVED INDICATION	INJURY, POISONING AND PROCEDURAL COMPLICATIONS	109	1.07 ( 0.88 - 1.29 )	1.07 ( 0.47 )
MYALGIA	MUSCULOSKELETAL AND CONNECTIVE TISSUE DISORDERS	107	0.76 ( 0.63 - 0.92 )	0.76 ( 7.96 )
NODULE	GENERAL DISORDERS AND ADMINISTRATION SITE CONDITIONS	107	1.12 ( 0.92 - 1.36 )	1.12 ( 1.34 )
FOOT DEFORMITY	MUSCULOSKELETAL AND CONNECTIVE TISSUE DISORDERS	106	0.87 ( 0.72 - 1.06 )	0.87 ( 1.87 )
THERAPY NON-RESPONDER	GENERAL DISORDERS AND ADMINISTRATION SITE CONDITIONS	105	1.23 ( 1.01 - 1.5 )	1.23 ( 4.47 )
PANCYTOPENIA	BLOOD AND LYMPHATIC SYSTEM DISORDERS	102	1.25 ( 1.03 - 1.52 )	1.25 ( 4.93 )
PLATELET COUNT DECREASED	INVESTIGATIONS	100	1.85 ( 1.51 - 2.26 )	1.85 ( 37.23 )
MYOCARDIAL INFARCTION	CARDIAC DISORDERS	99	0.52 ( 0.43 - 0.63 )	0.52 ( 43.17 )
MUSCLE SPASTICITY	NERVOUS SYSTEM DISORDERS	99	6.44 ( 5.2 - 7.98 )	6.44 ( 385.98 )
LOSS OF CONSCIOUSNESS	NERVOUS SYSTEM DISORDERS	98	0.83 ( 0.68 - 1.01 )	0.83 ( 3.38 )
DRUG TOLERANCE DECREASED	GENERAL DISORDERS AND ADMINISTRATION SITE CONDITIONS	98	4.4 ( 3.57 - 5.43 )	4.4 ( 229.5 )
PNEUMONITIS	RESPIRATORY, THORACIC AND MEDIASTINAL DISORDERS	96	2.76 ( 2.24 - 3.4 )	2.76 ( 100.19 )
MOUTH ULCERATION	GASTROINTESTINAL DISORDERS	96	1.72 ( 1.4 - 2.11 )	1.71 ( 27.3 )
TOXICITY TO VARIOUS AGENTS	INJURY, POISONING AND PROCEDURAL COMPLICATIONS	96	2.13 ( 1.74 - 2.62 )	2.13 ( 54.61 )
BRONCHITIS	INFECTIONS AND INFESTATIONS	96	0.31 ( 0.25 - 0.38 )	0.31 ( 148.39 )
GAIT INABILITY	GENERAL DISORDERS AND ADMINISTRATION SITE CONDITIONS	96	0.8 ( 0.66 - 0.98 )	0.8 ( 4.52 )
NECK PAIN	MUSCULOSKELETAL AND CONNECTIVE TISSUE DISORDERS	94	0.59 ( 0.48 - 0.73 )	0.59 ( 25.72 )
ANXIETY	PSYCHIATRIC DISORDERS	93	0.48 ( 0.39 - 0.59 )	0.48 ( 50.67 )
RESPIRATORY FAILURE	RESPIRATORY, THORACIC AND MEDIASTINAL DISORDERS	92	1.41 ( 1.14 - 1.73 )	1.41 ( 10.46 )
STRESS	PSYCHIATRIC DISORDERS	92	0.76 ( 0.62 - 0.94 )	0.76 ( 6.6 )
URINARY TRACT INFECTION	INFECTIONS AND INFESTATIONS	90	0.2 ( 0.16 - 0.24 )	0.2 ( 296 )
DRUG ERUPTION	SKIN AND SUBCUTANEOUS TISSUE DISORDERS	90	2.94 ( 2.37 - 3.64 )	2.94 ( 106.35 )
DRUG INTERACTION	GENERAL DISORDERS AND ADMINISTRATION SITE CONDITIONS	87	1.26 ( 1.02 - 1.56 )	1.26 ( 4.58 )
DISABILITY	SOCIAL CIRCUMSTANCES	87	2.29 ( 1.84 - 2.84 )	2.29 ( 59.28 )
THROMBOCYTOPENIA	BLOOD AND LYMPHATIC SYSTEM DISORDERS	87	1.52 ( 1.23 - 1.88 )	1.52 ( 14.82 )
IMPAIRED WORK ABILITY	SOCIAL CIRCUMSTANCES	86	2.68 ( 2.15 - 3.34 )	2.68 ( 84.21 )
RHEUMATIC FEVER	MUSCULOSKELETAL AND CONNECTIVE TISSUE DISORDERS	85	1.48 ( 1.19 - 1.84 )	1.48 ( 12.65 )
JAUNDICE	HEPATOBILIARY DISORDERS	83	8.21 ( 6.47 - 10.43 )	8.21 ( 428.04 )
FEMUR FRACTURE	INJURY, POISONING AND PROCEDURAL COMPLICATIONS	83	1.34 ( 1.07 - 1.66 )	1.34 ( 6.77 )
NEUROPATHY PERIPHERAL	NERVOUS SYSTEM DISORDERS	82	1.17 ( 0.94 - 1.46 )	1.17 ( 2.06 )
TRANSAMINASES INCREASED	INVESTIGATIONS	81	3.65 ( 2.9 - 4.58 )	3.65 ( 141.25 )
BREAST CANCER	NEOPLASMS BENIGN, MALIGNANT AND UNSPECIFIED (INCL CYSTS AND POLYPS)	81	0.82 ( 0.66 - 1.02 )	0.82 ( 3.18 )
TENOSYNOVITIS	MUSCULOSKELETAL AND CONNECTIVE TISSUE DISORDERS	81	3.8 ( 3.02 - 4.78 )	3.8 ( 151.02 )
DRY MOUTH	GASTROINTESTINAL DISORDERS	79	0.73 ( 0.59 - 0.92 )	0.73 ( 7.55 )
DEEP VEIN THROMBOSIS	VASCULAR DISORDERS	79	1.44 ( 1.15 - 1.81 )	1.44 ( 10.33 )
PULMONARY MASS	RESPIRATORY, THORACIC AND MEDIASTINAL DISORDERS	77	1.36 ( 1.09 - 1.71 )	1.36 ( 7.22 )
BASAL CELL CARCINOMA	NEOPLASMS BENIGN, MALIGNANT AND UNSPECIFIED (INCL CYSTS AND POLYPS)	77	1.08 ( 0.86 - 1.36 )	1.08 ( 0.49 )
DRY EYE	EYE DISORDERS	76	1.01 ( 0.81 - 1.27 )	1.01 ( 0.01 )
UPPER RESPIRATORY TRACT INFECTION	INFECTIONS AND INFESTATIONS	76	0.4 ( 0.32 - 0.5 )	0.4 ( 68.92 )
OEDEMA PERIPHERAL	GENERAL DISORDERS AND ADMINISTRATION SITE CONDITIONS	75	0.34 ( 0.27 - 0.43 )	0.34 ( 93.46 )
SWOLLEN JOINT COUNT INCREASED	INVESTIGATIONS	75	1.65 ( 1.31 - 2.08 )	1.65 ( 18.4 )
BLOOD BILIRUBIN INCREASED	INVESTIGATIONS	74	9.97 ( 7.71 - 12.9 )	9.97 ( 467.78 )
HEPATIC FUNCTION ABNORMAL	HEPATOBILIARY DISORDERS	74	3.24 ( 2.56 - 4.11 )	3.24 ( 105.26 )
UNEVALUABLE EVENT	GENERAL DISORDERS AND ADMINISTRATION SITE CONDITIONS	74	0.67 ( 0.53 - 0.85 )	0.67 ( 11.62 )
PANNICULITIS	SKIN AND SUBCUTANEOUS TISSUE DISORDERS	74	3.98 ( 3.13 - 5.06 )	3.97 ( 148.42 )
FINGER DEFORMITY	MUSCULOSKELETAL AND CONNECTIVE TISSUE DISORDERS	73	1.2 ( 0.95 - 1.52 )	1.2 ( 2.46 )
BLOOD CREATININE INCREASED	INVESTIGATIONS	73	1.87 ( 1.48 - 2.36 )	1.87 ( 27.91 )
MUSCULOSKELETAL DISORDER	MUSCULOSKELETAL AND CONNECTIVE TISSUE DISORDERS	73	0.79 ( 0.63 - 1 )	0.79 ( 3.93 )
PULMONARY TOXICITY	RESPIRATORY, THORACIC AND MEDIASTINAL DISORDERS	73	4.84 ( 3.79 - 6.18 )	4.83 ( 195.82 )
LOCALISED INFECTION	INFECTIONS AND INFESTATIONS	72	0.56 ( 0.45 - 0.71 )	0.56 ( 23.83 )
PALPITATIONS	CARDIAC DISORDERS	72	0.81 ( 0.64 - 1.03 )	0.81 ( 3.04 )
CELLULITIS	INFECTIONS AND INFESTATIONS	70	0.5 ( 0.4 - 0.63 )	0.5 ( 34.39 )
INFLUENZA	INFECTIONS AND INFESTATIONS	70	0.19 ( 0.15 - 0.24 )	0.19 ( 236.75 )
CATARACT	EYE DISORDERS	69	0.41 ( 0.32 - 0.52 )	0.41 ( 58.49 )
ABDOMINAL DISTENSION	GASTROINTESTINAL DISORDERS	69	0.85 ( 0.67 - 1.08 )	0.85 ( 1.75 )
DIABETES MELLITUS	METABOLISM AND NUTRITION DISORDERS	69	0.57 ( 0.45 - 0.72 )	0.57 ( 22.58 )
PLEURAL EFFUSION	RESPIRATORY, THORACIC AND MEDIASTINAL DISORDERS	69	0.91 ( 0.72 - 1.16 )	0.91 ( 0.54 )
CROHN'S DISEASE	GASTROINTESTINAL DISORDERS	69	1.41 ( 1.11 - 1.8 )	1.41 ( 7.98 )
PREGNANCY	PREGNANCY, PUERPERIUM AND PERINATAL CONDITIONS	68	2.56 ( 2 - 3.27 )	2.56 ( 60.34 )
OEDEMA	GENERAL DISORDERS AND ADMINISTRATION SITE CONDITIONS	68	1 ( 0.79 - 1.28 )	1 ( 0 )
HYPERCALCAEMIA	METABOLISM AND NUTRITION DISORDERS	68	3.27 ( 2.55 - 4.2 )	3.27 ( 98.4 )
INJURY	INJURY, POISONING AND PROCEDURAL COMPLICATIONS	68	0.89 ( 0.7 - 1.13 )	0.89 ( 0.92 )
HEPATIC STEATOSIS	HEPATOBILIARY DISORDERS	66	1.56 ( 1.22 - 2 )	1.56 ( 12.76 )
ULCER	GENERAL DISORDERS AND ADMINISTRATION SITE CONDITIONS	66	1.56 ( 1.22 - 1.99 )	1.56 ( 12.57 )
FOETAL EXPOSURE DURING PREGNANCY	INJURY, POISONING AND PROCEDURAL COMPLICATIONS	65	5.68 ( 4.38 - 7.38 )	5.68 ( 216.61 )
MEDICATION ERROR	INJURY, POISONING AND PROCEDURAL COMPLICATIONS	65	1.67 ( 1.3 - 2.14 )	1.67 ( 16.79 )
SEPTIC SHOCK	INFECTIONS AND INFESTATIONS	64	1.25 ( 0.97 - 1.6 )	1.25 ( 3.05 )
RASH MACULO-PAPULAR	SKIN AND SUBCUTANEOUS TISSUE DISORDERS	63	5.34 ( 4.1 - 6.96 )	5.34 ( 193.48 )
RHEUMATOID LUNG	RESPIRATORY, THORACIC AND MEDIASTINAL DISORDERS	63	3.19 ( 2.46 - 4.12 )	3.18 ( 86.78 )
BLOOD PARATHYROID HORMONE DECREASED	INVESTIGATIONS	63	4.43 ( 3.41 - 5.75 )	4.42 ( 148.73 )
DEATH	GENERAL DISORDERS AND ADMINISTRATION SITE CONDITIONS	62	0.15 ( 0.12 - 0.19 )	0.15 ( 302.66 )
MIGRAINE	NERVOUS SYSTEM DISORDERS	62	0.47 ( 0.36 - 0.6 )	0.47 ( 36.78 )
ATRIAL FIBRILLATION	CARDIAC DISORDERS	62	0.58 ( 0.45 - 0.75 )	0.58 ( 18.03 )
ANAPHYLACTIC REACTION	IMMUNE SYSTEM DISORDERS	62	1.26 ( 0.98 - 1.62 )	1.26 ( 3.21 )
JOINT INJURY	INJURY, POISONING AND PROCEDURAL COMPLICATIONS	62	0.77 ( 0.6 - 0.99 )	0.77 ( 4.13 )
MUSCLE SPASMS	MUSCULOSKELETAL AND CONNECTIVE TISSUE DISORDERS	61	0.32 ( 0.25 - 0.42 )	0.32 ( 85 )
LIMB DISCOMFORT	MUSCULOSKELETAL AND CONNECTIVE TISSUE DISORDERS	60	0.88 ( 0.68 - 1.14 )	0.88 ( 0.98 )
OSTEOMYELITIS	INFECTIONS AND INFESTATIONS	60	1.21 ( 0.93 - 1.56 )	1.21 ( 2.08 )
SOMNOLENCE	NERVOUS SYSTEM DISORDERS	59	0.56 ( 0.43 - 0.73 )	0.56 ( 19.93 )
DEFORMITY	GENERAL DISORDERS AND ADMINISTRATION SITE CONDITIONS	59	2.79 ( 2.14 - 3.64 )	2.79 ( 62.95 )
JOINT EFFUSION	MUSCULOSKELETAL AND CONNECTIVE TISSUE DISORDERS	59	1.02 ( 0.79 - 1.32 )	1.02 ( 0.02 )
CONSTIPATION	GASTROINTESTINAL DISORDERS	59	0.55 ( 0.42 - 0.71 )	0.55 ( 21.81 )
AMNESIA	NERVOUS SYSTEM DISORDERS	58	0.8 ( 0.62 - 1.04 )	0.8 ( 2.69 )
INJECTION SITE REACTION	GENERAL DISORDERS AND ADMINISTRATION SITE CONDITIONS	58	0.15 ( 0.11 - 0.19 )	0.15 ( 282.99 )
CEREBROVASCULAR ACCIDENT	NERVOUS SYSTEM DISORDERS	57	0.34 ( 0.26 - 0.44 )	0.34 ( 71.39 )
HEPATIC CIRRHOSIS	HEPATOBILIARY DISORDERS	57	1.39 ( 1.06 - 1.81 )	1.39 ( 5.89 )
NEOPLASM MALIGNANT	NEOPLASMS BENIGN, MALIGNANT AND UNSPECIFIED (INCL CYSTS AND POLYPS)	57	0.57 ( 0.44 - 0.74 )	0.57 ( 18.53 )
SKIN NECROSIS	SKIN AND SUBCUTANEOUS TISSUE DISORDERS	57	3.31 ( 2.53 - 4.35 )	3.31 ( 84.31 )
DEHYDRATION	METABOLISM AND NUTRITION DISORDERS	56	0.59 ( 0.45 - 0.76 )	0.59 ( 15.99 )
ASTHMA	RESPIRATORY, THORACIC AND MEDIASTINAL DISORDERS	56	0.41 ( 0.31 - 0.53 )	0.41 ( 47.66 )
ABORTION SPONTANEOUS	PREGNANCY, PUERPERIUM AND PERINATAL CONDITIONS	56	1.6 ( 1.22 - 2.09 )	1.6 ( 11.92 )
CARDIAC FAILURE	CARDIAC DISORDERS	56	0.78 ( 0.6 - 1.02 )	0.78 ( 3.42 )
HYPOTENSION	VASCULAR DISORDERS	56	0.45 ( 0.35 - 0.59 )	0.45 ( 36.35 )
TREMOR	NERVOUS SYSTEM DISORDERS	55	0.55 ( 0.42 - 0.72 )	0.55 ( 19.95 )
GRIP STRENGTH DECREASED	INVESTIGATIONS	55	0.72 ( 0.55 - 0.94 )	0.72 ( 5.72 )
HEPATIC FAILURE	HEPATOBILIARY DISORDERS	54	3.46 ( 2.62 - 4.58 )	3.46 ( 86.27 )
EYE DISORDER	EYE DISORDERS	54	0.91 ( 0.69 - 1.19 )	0.91 ( 0.47 )
HYPERHIDROSIS	SKIN AND SUBCUTANEOUS TISSUE DISORDERS	54	0.43 ( 0.33 - 0.56 )	0.43 ( 40.91 )
SYNOVIAL CYST	MUSCULOSKELETAL AND CONNECTIVE TISSUE DISORDERS	54	1.42 ( 1.08 - 1.86 )	1.42 ( 6.47 )
GRANULOMA SKIN	SKIN AND SUBCUTANEOUS TISSUE DISORDERS	54	4.32 ( 3.26 - 5.73 )	4.32 ( 123.13 )
SURGERY	SURGICAL AND MEDICAL PROCEDURES	53	0.32 ( 0.24 - 0.41 )	0.32 ( 77.65 )
WHITE BLOOD CELL COUNT INCREASED	INVESTIGATIONS	53	1.03 ( 0.79 - 1.36 )	1.03 ( 0.05 )
SYNCOPE	NERVOUS SYSTEM DISORDERS	52	0.72 ( 0.55 - 0.95 )	0.72 ( 5.46 )
THROMBOSIS	VASCULAR DISORDERS	52	0.5 ( 0.38 - 0.66 )	0.5 ( 25.58 )
RED BLOOD CELL COUNT DECREASED	INVESTIGATIONS	52	1.8 ( 1.36 - 2.37 )	1.8 ( 17.48 )
CONGENITAL ANOMALY	CONGENITAL, FAMILIAL AND GENETIC DISORDERS	52	31.3 ( 21.59 - 45.37 )	31.28 ( 816.56 )
POLYARTHRITIS	MUSCULOSKELETAL AND CONNECTIVE TISSUE DISORDERS	51	2.46 ( 1.86 - 3.27 )	2.46 ( 41.54 )
COLITIS	GASTROINTESTINAL DISORDERS	49	1.19 ( 0.89 - 1.58 )	1.19 ( 1.42 )
RENAL IMPAIRMENT	RENAL AND URINARY DISORDERS	49	0.72 ( 0.54 - 0.95 )	0.72 ( 5.32 )
INFLUENZA LIKE ILLNESS	GENERAL DISORDERS AND ADMINISTRATION SITE CONDITIONS	49	0.4 ( 0.3 - 0.53 )	0.4 ( 43.55 )
PANCREATITIS	GASTROINTESTINAL DISORDERS	49	1.18 ( 0.89 - 1.57 )	1.18 ( 1.34 )
TUBERCULOSIS	INFECTIONS AND INFESTATIONS	49	0.75 ( 0.56 - 0.99 )	0.75 ( 4.04 )
MEMORY IMPAIRMENT	NERVOUS SYSTEM DISORDERS	48	0.28 ( 0.21 - 0.37 )	0.28 ( 90.98 )
BONE DENSITY DECREASED	INVESTIGATIONS	48	3.04 ( 2.26 - 4.08 )	3.04 ( 60.59 )
VISION BLURRED	EYE DISORDERS	48	0.49 ( 0.37 - 0.66 )	0.49 ( 24.72 )
CHILLS	GENERAL DISORDERS AND ADMINISTRATION SITE CONDITIONS	47	0.31 ( 0.23 - 0.42 )	0.31 ( 70.41 )
APPARENT DEATH	GENERAL DISORDERS AND ADMINISTRATION SITE CONDITIONS	47	4.51 ( 3.33 - 6.11 )	4.51 ( 114.2 )
COVID-19	INFECTIONS AND INFESTATIONS	47	0.12 ( 0.09 - 0.16 )	0.12 ( 296.88 )
CYSTITIS	INFECTIONS AND INFESTATIONS	45	0.4 ( 0.3 - 0.54 )	0.41 ( 38.9 )
SCIATICA	NERVOUS SYSTEM DISORDERS	45	0.58 ( 0.43 - 0.77 )	0.58 ( 13.84 )
PSORIASIS	SKIN AND SUBCUTANEOUS TISSUE DISORDERS	44	0.26 ( 0.2 - 0.36 )	0.27 ( 89.19 )
WHEEZING	RESPIRATORY, THORACIC AND MEDIASTINAL DISORDERS	44	0.57 ( 0.42 - 0.76 )	0.57 ( 14.3 )
ABORTION INDUCED	SURGICAL AND MEDICAL PROCEDURES	44	12.41 ( 8.81 - 17.48 )	12.41 ( 343.41 )
HYPERCHOLESTEROLAEMIA	METABOLISM AND NUTRITION DISORDERS	44	1.38 ( 1.02 - 1.87 )	1.38 ( 4.48 )
DYSPNOEA EXERTIONAL	RESPIRATORY, THORACIC AND MEDIASTINAL DISORDERS	43	1.54 ( 1.13 - 2.09 )	1.54 ( 7.8 )
SKIN LESION	SKIN AND SUBCUTANEOUS TISSUE DISORDERS	43	0.93 ( 0.69 - 1.26 )	0.93 ( 0.23 )
STAPHYLOCOCCAL INFECTION	INFECTIONS AND INFESTATIONS	42	0.45 ( 0.33 - 0.61 )	0.45 ( 27.7 )
SWELLING FACE	GENERAL DISORDERS AND ADMINISTRATION SITE CONDITIONS	42	0.56 ( 0.42 - 0.77 )	0.56 ( 13.88 )
BURSITIS	MUSCULOSKELETAL AND CONNECTIVE TISSUE DISORDERS	42	0.51 ( 0.37 - 0.69 )	0.51 ( 19.86 )
DISEASE PROGRESSION	GENERAL DISORDERS AND ADMINISTRATION SITE CONDITIONS	42	1.59 ( 1.17 - 2.17 )	1.59 ( 8.86 )
ACUTE KIDNEY INJURY	RENAL AND URINARY DISORDERS	42	0.85 ( 0.63 - 1.15 )	0.85 ( 1.1 )
ADVERSE REACTION	GENERAL DISORDERS AND ADMINISTRATION SITE CONDITIONS	42	1.42 ( 1.04 - 1.94 )	1.42 ( 5.06 )
GASTROOESOPHAGEAL REFLUX DISEASE	GASTROINTESTINAL DISORDERS	42	0.46 ( 0.34 - 0.63 )	0.46 ( 25.92 )
GASTROINTESTINAL HAEMORRHAGE	GASTROINTESTINAL DISORDERS	41	1.07 ( 0.78 - 1.46 )	1.07 ( 0.19 )
OROPHARYNGEAL PAIN	RESPIRATORY, THORACIC AND MEDIASTINAL DISORDERS	41	0.16 ( 0.12 - 0.21 )	0.16 ( 183.53 )
INJECTION SITE PAIN	GENERAL DISORDERS AND ADMINISTRATION SITE CONDITIONS	41	0.03 ( 0.02 - 0.04 )	0.03 ( 1276.48 )
LYMPHADENOPATHY	BLOOD AND LYMPHATIC SYSTEM DISORDERS	40	0.6 ( 0.44 - 0.81 )	0.6 ( 10.8 )
ORAL DISCOMFORT	GASTROINTESTINAL DISORDERS	40	3.17 ( 2.29 - 4.38 )	3.17 ( 54.5 )
SKIN REACTION	SKIN AND SUBCUTANEOUS TISSUE DISORDERS	40	1.99 ( 1.44 - 2.73 )	1.99 ( 18.56 )
SKIN EXFOLIATION	SKIN AND SUBCUTANEOUS TISSUE DISORDERS	39	0.79 ( 0.57 - 1.08 )	0.79 ( 2.22 )
VASCULITIS	VASCULAR DISORDERS	39	1.4 ( 1.01 - 1.92 )	1.4 ( 4.2 )
COLITIS MICROSCOPIC	GASTROINTESTINAL DISORDERS	39	3.99 ( 2.87 - 5.55 )	3.99 ( 78.62 )
NEPHROLITHIASIS	RENAL AND URINARY DISORDERS	39	0.38 ( 0.28 - 0.52 )	0.38 ( 38.75 )
NON-HODGKIN'S LYMPHOMA	NEOPLASMS BENIGN, MALIGNANT AND UNSPECIFIED (INCL CYSTS AND POLYPS)	39	1.94 ( 1.41 - 2.68 )	1.94 ( 16.83 )
PRESCRIBED UNDERDOSE	INJURY, POISONING AND PROCEDURAL COMPLICATIONS	39	1.53 ( 1.11 - 2.11 )	1.53 ( 6.91 )
DRUG DEPENDENCE	PSYCHIATRIC DISORDERS	39	2.35 ( 1.7 - 3.25 )	2.35 ( 28.4 )
X-RAY ABNORMAL	INVESTIGATIONS	39	2.19 ( 1.59 - 3.03 )	2.19 ( 23.85 )
HAEMATOCRIT DECREASED	INVESTIGATIONS	37	2.04 ( 1.47 - 2.84 )	2.04 ( 18.62 )
DERMATITIS ALLERGIC	SKIN AND SUBCUTANEOUS TISSUE DISORDERS	37	1.42 ( 1.02 - 1.98 )	1.42 ( 4.46 )
OXYGEN SATURATION DECREASED	INVESTIGATIONS	36	0.35 ( 0.25 - 0.48 )	0.35 ( 44.17 )
BLOOD GLUCOSE INCREASED	INVESTIGATIONS	36	0.49 ( 0.35 - 0.68 )	0.49 ( 18.77 )
TACHYCARDIA	CARDIAC DISORDERS	36	0.72 ( 0.52 - 1.01 )	0.73 ( 3.68 )
CREPITATIONS	GENERAL DISORDERS AND ADMINISTRATION SITE CONDITIONS	36	3.97 ( 2.82 - 5.61 )	3.97 ( 72.17 )
HOT FLUSH	VASCULAR DISORDERS	36	0.62 ( 0.45 - 0.86 )	0.62 ( 8.27 )
PHOTOSENSITIVITY REACTION	SKIN AND SUBCUTANEOUS TISSUE DISORDERS	36	1.52 ( 1.09 - 2.13 )	1.52 ( 6.21 )
GASTRIC ULCER	GASTROINTESTINAL DISORDERS	36	0.99 ( 0.71 - 1.38 )	0.99 ( 0 )
SENSITIVITY TO WEATHER CHANGE	GENERAL DISORDERS AND ADMINISTRATION SITE CONDITIONS	36	0.79 ( 0.57 - 1.1 )	0.79 ( 1.94 )
FOOT FRACTURE	INJURY, POISONING AND PROCEDURAL COMPLICATIONS	36	0.64 ( 0.46 - 0.89 )	0.64 ( 7.26 )
BURNING SENSATION	NERVOUS SYSTEM DISORDERS	35	0.38 ( 0.27 - 0.53 )	0.38 ( 34.76 )
JOINT ARTHROPLASTY	SURGICAL AND MEDICAL PROCEDURES	35	1.61 ( 1.14 - 2.25 )	1.61 ( 7.65 )
PRESCRIBED OVERDOSE	INJURY, POISONING AND PROCEDURAL COMPLICATIONS	35	1 ( 0.72 - 1.4 )	1 ( 0 )
EXOSTOSIS	MUSCULOSKELETAL AND CONNECTIVE TISSUE DISORDERS	35	0.67 ( 0.48 - 0.94 )	0.67 ( 5.49 )
BLOOD PRESSURE FLUCTUATION	VASCULAR DISORDERS	35	0.41 ( 0.29 - 0.57 )	0.41 ( 30.24 )
POLYNEUROPATHY	NERVOUS SYSTEM DISORDERS	34	3.12 ( 2.19 - 4.42 )	3.11 ( 44.94 )
RASH ERYTHEMATOUS	SKIN AND SUBCUTANEOUS TISSUE DISORDERS	34	0.42 ( 0.3 - 0.59 )	0.42 ( 26.32 )
GLAUCOMA	EYE DISORDERS	34	0.83 ( 0.59 - 1.17 )	0.83 ( 1.11 )
BLOOD UREA INCREASED	INVESTIGATIONS	34	4.22 ( 2.96 - 6.02 )	4.22 ( 74.72 )
CARPAL TUNNEL SYNDROME	NERVOUS SYSTEM DISORDERS	34	0.47 ( 0.34 - 0.66 )	0.47 ( 19.65 )
HEPATIC ENZYME ABNORMAL	INVESTIGATIONS	34	2.59 ( 1.83 - 3.67 )	2.59 ( 30.94 )
LABORATORY TEST ABNORMAL	INVESTIGATIONS	33	0.96 ( 0.68 - 1.36 )	0.96 ( 0.04 )
JOINT DISLOCATION	INJURY, POISONING AND PROCEDURAL COMPLICATIONS	33	0.58 ( 0.41 - 0.82 )	0.58 ( 9.68 )
BLOOD PRESSURE SYSTOLIC INCREASED	INVESTIGATIONS	33	0.4 ( 0.28 - 0.56 )	0.4 ( 29.64 )
LYMPHOMA	NEOPLASMS BENIGN, MALIGNANT AND UNSPECIFIED (INCL CYSTS AND POLYPS)	33	0.63 ( 0.44 - 0.89 )	0.63 ( 7.18 )
EAR INFECTION	INFECTIONS AND INFESTATIONS	33	0.3 ( 0.21 - 0.42 )	0.3 ( 54.47 )
MULTIPLE FRACTURES	INJURY, POISONING AND PROCEDURAL COMPLICATIONS	33	2.88 ( 2.02 - 4.11 )	2.88 ( 37.61 )
FOOD INTOLERANCE	METABOLISM AND NUTRITION DISORDERS	33	6.24 ( 4.31 - 9.03 )	6.24 ( 123.71 )
NO ADVERSE EVENT	GENERAL DISORDERS AND ADMINISTRATION SITE CONDITIONS	33	0.44 ( 0.31 - 0.62 )	0.44 ( 23.1 )
RHINORRHOEA	RESPIRATORY, THORACIC AND MEDIASTINAL DISORDERS	32	0.21 ( 0.15 - 0.3 )	0.21 ( 94.79 )
TENDONITIS	MUSCULOSKELETAL AND CONNECTIVE TISSUE DISORDERS	32	0.94 ( 0.66 - 1.33 )	0.94 ( 0.14 )
CHEST DISCOMFORT	GENERAL DISORDERS AND ADMINISTRATION SITE CONDITIONS	32	0.31 ( 0.22 - 0.43 )	0.31 ( 49.69 )
LOWER LIMB FRACTURE	INJURY, POISONING AND PROCEDURAL COMPLICATIONS	32	0.51 ( 0.36 - 0.72 )	0.51 ( 15.08 )
OBESITY	METABOLISM AND NUTRITION DISORDERS	32	0.92 ( 0.64 - 1.3 )	0.92 ( 0.24 )
HYPOKALAEMIA	METABOLISM AND NUTRITION DISORDERS	32	1.57 ( 1.1 - 2.24 )	1.57 ( 6.33 )
STEVENS-JOHNSON SYNDROME	SKIN AND SUBCUTANEOUS TISSUE DISORDERS	31	4.07 ( 2.81 - 5.9 )	4.07 ( 64.48 )
CANDIDA INFECTION	INFECTIONS AND INFESTATIONS	31	1.23 ( 0.86 - 1.76 )	1.23 ( 1.33 )
PRODUCTIVE COUGH	RESPIRATORY, THORACIC AND MEDIASTINAL DISORDERS	31	0.29 ( 0.2 - 0.41 )	0.29 ( 53.39 )
EMPHYSEMA	RESPIRATORY, THORACIC AND MEDIASTINAL DISORDERS	31	1.41 ( 0.98 - 2.02 )	1.41 ( 3.52 )
RECTAL HAEMORRHAGE	GASTROINTESTINAL DISORDERS	30	0.9 ( 0.62 - 1.29 )	0.9 ( 0.34 )
DYSSTASIA	NERVOUS SYSTEM DISORDERS	30	0.62 ( 0.44 - 0.9 )	0.62 ( 6.67 )
OSTEOPENIA	MUSCULOSKELETAL AND CONNECTIVE TISSUE DISORDERS	30	1.17 ( 0.81 - 1.68 )	1.17 ( 0.69 )
WOUND INFECTION	INFECTIONS AND INFESTATIONS	30	0.54 ( 0.37 - 0.77 )	0.54 ( 11.84 )
DISLOCATION OF VERTEBRA	INJURY, POISONING AND PROCEDURAL COMPLICATIONS	30	1.43 ( 1 - 2.07 )	1.43 ( 3.79 )
PRODUCT DOSE OMISSION ISSUE	INJURY, POISONING AND PROCEDURAL COMPLICATIONS	30	0.14 ( 0.1 - 0.2 )	0.14 ( 162.98 )
LIVE BIRTH	PREGNANCY, PUERPERIUM AND PERINATAL CONDITIONS	30	1.32 ( 0.92 - 1.9 )	1.32 ( 2.25 )
ALLERGY TO CHEMICALS	IMMUNE SYSTEM DISORDERS	30	6.99 ( 4.73 - 10.33 )	6.99 ( 128.92 )
SEIZURE	NERVOUS SYSTEM DISORDERS	29	0.64 ( 0.44 - 0.93 )	0.64 ( 5.72 )
HYPOXIA	RESPIRATORY, THORACIC AND MEDIASTINAL DISORDERS	29	1.83 ( 1.26 - 2.66 )	1.83 ( 10.39 )
BEDRIDDEN	SOCIAL CIRCUMSTANCES	29	0.9 ( 0.62 - 1.3 )	0.9 ( 0.33 )
BACK DISORDER	MUSCULOSKELETAL AND CONNECTIVE TISSUE DISORDERS	29	0.68 ( 0.47 - 0.98 )	0.68 ( 4.37 )
CHOLELITHIASIS	HEPATOBILIARY DISORDERS	29	0.53 ( 0.37 - 0.77 )	0.53 ( 11.61 )
MUCOSAL INFLAMMATION	GENERAL DISORDERS AND ADMINISTRATION SITE CONDITIONS	29	1.41 ( 0.98 - 2.05 )	1.41 ( 3.39 )
FEELING HOT	GENERAL DISORDERS AND ADMINISTRATION SITE CONDITIONS	29	0.33 ( 0.23 - 0.47 )	0.33 ( 40 )
SECRETION DISCHARGE	GENERAL DISORDERS AND ADMINISTRATION SITE CONDITIONS	29	1.27 ( 0.88 - 1.84 )	1.27 ( 1.59 )
SPINAL STENOSIS	MUSCULOSKELETAL AND CONNECTIVE TISSUE DISORDERS	29	1.31 ( 0.9 - 1.9 )	1.31 ( 2.03 )
SCAR	INJURY, POISONING AND PROCEDURAL COMPLICATIONS	28	1.22 ( 0.84 - 1.78 )	1.22 ( 1.07 )
HEART RATE INCREASED	INVESTIGATIONS	28	0.28 ( 0.2 - 0.41 )	0.28 ( 50.14 )
IMMUNODEFICIENCY	IMMUNE SYSTEM DISORDERS	28	0.37 ( 0.26 - 0.54 )	0.37 ( 29.01 )
INJECTION SITE ERYTHEMA	GENERAL DISORDERS AND ADMINISTRATION SITE CONDITIONS	28	0.03 ( 0.02 - 0.05 )	0.03 ( 780.12 )
RESPIRATORY TRACT INFECTION	INFECTIONS AND INFESTATIONS	28	0.38 ( 0.26 - 0.56 )	0.38 ( 27.52 )
FOOT OPERATION	SURGICAL AND MEDICAL PROCEDURES	28	0.69 ( 0.48 - 1.01 )	0.69 ( 3.75 )
BONE DISORDER	MUSCULOSKELETAL AND CONNECTIVE TISSUE DISORDERS	28	0.62 ( 0.43 - 0.9 )	0.62 ( 6.45 )
MUSCULOSKELETAL DISCOMFORT	MUSCULOSKELETAL AND CONNECTIVE TISSUE DISORDERS	28	0.64 ( 0.44 - 0.93 )	0.64 ( 5.49 )
ARRHYTHMIA	CARDIAC DISORDERS	28	0.73 ( 0.5 - 1.06 )	0.73 ( 2.7 )
RENAL DISORDER	RENAL AND URINARY DISORDERS	28	0.47 ( 0.32 - 0.68 )	0.47 ( 16.57 )
TENDERNESS	GENERAL DISORDERS AND ADMINISTRATION SITE CONDITIONS	28	0.96 ( 0.66 - 1.39 )	0.96 ( 0.05 )
ANAPHYLACTIC SHOCK	IMMUNE SYSTEM DISORDERS	28	1.91 ( 1.3 - 2.79 )	1.91 ( 11.47 )
BALANCE DISORDER	NERVOUS SYSTEM DISORDERS	28	0.42 ( 0.29 - 0.61 )	0.42 ( 22.48 )
LUPUS-LIKE SYNDROME	MUSCULOSKELETAL AND CONNECTIVE TISSUE DISORDERS	28	0.82 ( 0.57 - 1.2 )	0.82 ( 1.03 )
VERTIGO	EAR AND LABYRINTH DISORDERS	27	0.45 ( 0.31 - 0.65 )	0.45 ( 18.35 )
CHROMATURIA	RENAL AND URINARY DISORDERS	27	2.06 ( 1.4 - 3.03 )	2.06 ( 13.85 )
HEART RATE DECREASED	INVESTIGATIONS	27	0.37 ( 0.25 - 0.54 )	0.37 ( 28.84 )
HOSPITALISATION	SURGICAL AND MEDICAL PROCEDURES	27	0.25 ( 0.17 - 0.36 )	0.25 ( 62.02 )
DYSPHAGIA	GASTROINTESTINAL DISORDERS	27	0.47 ( 0.32 - 0.68 )	0.47 ( 16.3 )
THYROID DISORDER	ENDOCRINE DISORDERS	27	0.96 ( 0.65 - 1.4 )	0.96 ( 0.05 )
DISEASE RECURRENCE	GENERAL DISORDERS AND ADMINISTRATION SITE CONDITIONS	27	0.98 ( 0.67 - 1.43 )	0.98 ( 0.02 )
TUBERCULIN TEST POSITIVE	INVESTIGATIONS	27	1.11 ( 0.76 - 1.62 )	1.11 ( 0.27 )
PULMONARY OEDEMA	RESPIRATORY, THORACIC AND MEDIASTINAL DISORDERS	27	0.5 ( 0.34 - 0.73 )	0.5 ( 13.49 )
FEEDING DISORDER	METABOLISM AND NUTRITION DISORDERS	27	1.31 ( 0.89 - 1.92 )	1.31 ( 1.91 )
TOOTH DISORDER	GASTROINTESTINAL DISORDERS	27	0.46 ( 0.32 - 0.68 )	0.46 ( 16.64 )
PULMONARY THROMBOSIS	RESPIRATORY, THORACIC AND MEDIASTINAL DISORDERS	27	0.96 ( 0.65 - 1.4 )	0.96 ( 0.05 )
DELIRIUM	PSYCHIATRIC DISORDERS	27	0.98 ( 0.67 - 1.43 )	0.98 ( 0.01 )
DRUG USE DISORDER	PSYCHIATRIC DISORDERS	27	4.39 ( 2.94 - 6.55 )	4.39 ( 63.01 )
ALANINE AMINOTRANSFERASE ABNORMAL	INVESTIGATIONS	27	3.43 ( 2.31 - 5.09 )	3.43 ( 42.48 )
BLOOD ALBUMIN DECREASED	INVESTIGATIONS	27	4.2 ( 2.82 - 6.26 )	4.2 ( 58.98 )
CHRONIC OBSTRUCTIVE PULMONARY DISEASE	RESPIRATORY, THORACIC AND MEDIASTINAL DISORDERS	26	0.29 ( 0.2 - 0.42 )	0.29 ( 45.67 )
BONE MARROW FAILURE	BLOOD AND LYMPHATIC SYSTEM DISORDERS	26	1.63 ( 1.1 - 2.42 )	1.63 ( 6.09 )
ENCEPHALITIS	INFECTIONS AND INFESTATIONS	26	2.6 ( 1.75 - 3.87 )	2.6 ( 23.87 )
SJOGREN'S SYNDROME	MUSCULOSKELETAL AND CONNECTIVE TISSUE DISORDERS	26	0.86 ( 0.58 - 1.26 )	0.86 ( 0.62 )
SKIN DISORDER	SKIN AND SUBCUTANEOUS TISSUE DISORDERS	26	0.55 ( 0.37 - 0.81 )	0.55 ( 9.37 )
VIRAL UPPER RESPIRATORY TRACT INFECTION	INFECTIONS AND INFESTATIONS	26	1.35 ( 0.91 - 2 )	1.35 ( 2.28 )
COELIAC DISEASE	GASTROINTESTINAL DISORDERS	26	0.94 ( 0.64 - 1.39 )	0.94 ( 0.09 )
LIP DRY	GASTROINTESTINAL DISORDERS	26	0.86 ( 0.59 - 1.27 )	0.86 ( 0.55 )
ECZEMA	SKIN AND SUBCUTANEOUS TISSUE DISORDERS	25	0.78 ( 0.52 - 1.16 )	0.78 ( 1.52 )
SPEECH DISORDER	NERVOUS SYSTEM DISORDERS	25	0.73 ( 0.49 - 1.08 )	0.73 ( 2.45 )
NASAL CONGESTION	RESPIRATORY, THORACIC AND MEDIASTINAL DISORDERS	25	0.19 ( 0.13 - 0.28 )	0.19 ( 88.06 )
DERMATITIS	SKIN AND SUBCUTANEOUS TISSUE DISORDERS	25	1.27 ( 0.85 - 1.89 )	1.27 ( 1.35 )
SUICIDAL IDEATION	PSYCHIATRIC DISORDERS	25	1.06 ( 0.71 - 1.58 )	1.06 ( 0.09 )
ARTHRODESIS	SURGICAL AND MEDICAL PROCEDURES	25	1.71 ( 1.14 - 2.55 )	1.71 ( 7.02 )
EPISTAXIS	RESPIRATORY, THORACIC AND MEDIASTINAL DISORDERS	25	0.4 ( 0.27 - 0.6 )	0.4 ( 21.77 )
SHOCK	VASCULAR DISORDERS	25	2.37 ( 1.58 - 3.56 )	2.37 ( 18.66 )
PHARYNGEAL OEDEMA	RESPIRATORY, THORACIC AND MEDIASTINAL DISORDERS	25	1.26 ( 0.85 - 1.88 )	1.26 ( 1.3 )
INTERVERTEBRAL DISC PROTRUSION	MUSCULOSKELETAL AND CONNECTIVE TISSUE DISORDERS	25	0.27 ( 0.19 - 0.41 )	0.27 ( 47.6 )
PHARYNGITIS	INFECTIONS AND INFESTATIONS	25	0.45 ( 0.3 - 0.66 )	0.45 ( 17.02 )
ILLNESS	GENERAL DISORDERS AND ADMINISTRATION SITE CONDITIONS	25	0.13 ( 0.09 - 0.19 )	0.13 ( 144.96 )
KIDNEY INFECTION	INFECTIONS AND INFESTATIONS	25	0.35 ( 0.23 - 0.51 )	0.35 ( 30.57 )
IRON DEFICIENCY ANAEMIA	BLOOD AND LYMPHATIC SYSTEM DISORDERS	25	1.89 ( 1.27 - 2.83 )	1.89 ( 9.98 )
CHOLESTASIS	HEPATOBILIARY DISORDERS	25	3.29 ( 2.19 - 4.96 )	3.29 ( 36.58 )
FACET JOINT SYNDROME	MUSCULOSKELETAL AND CONNECTIVE TISSUE DISORDERS	25	0.93 ( 0.63 - 1.39 )	0.93 ( 0.12 )
HAEMATOCHEZIA	GASTROINTESTINAL DISORDERS	24	0.56 ( 0.38 - 0.84 )	0.56 ( 8.01 )
IMMOBILE	SOCIAL CIRCUMSTANCES	24	1.98 ( 1.31 - 2.99 )	1.98 ( 11.07 )
TOXIC EPIDERMAL NECROLYSIS	SKIN AND SUBCUTANEOUS TISSUE DISORDERS	24	9.03 ( 5.77 - 14.12 )	9.02 ( 136.97 )
PNEUMOCYSTIS JIROVECII PNEUMONIA	INFECTIONS AND INFESTATIONS	24	0.82 ( 0.55 - 1.24 )	0.82 ( 0.87 )
NAIL DISORDER	SKIN AND SUBCUTANEOUS TISSUE DISORDERS	24	0.94 ( 0.63 - 1.41 )	0.94 ( 0.08 )
RETINITIS	INFECTIONS AND INFESTATIONS	24	2.53 ( 1.67 - 3.82 )	2.53 ( 20.67 )
FUNGAL INFECTION	INFECTIONS AND INFESTATIONS	24	0.3 ( 0.2 - 0.45 )	0.3 ( 38.25 )
ANGIOEDEMA	SKIN AND SUBCUTANEOUS TISSUE DISORDERS	24	1.49 ( 0.99 - 2.25 )	1.49 ( 3.76 )
DEAFNESS	EAR AND LABYRINTH DISORDERS	24	0.61 ( 0.41 - 0.91 )	0.61 ( 6.03 )
ENTHESOPATHY	MUSCULOSKELETAL AND CONNECTIVE TISSUE DISORDERS	24	2.99 ( 1.97 - 4.53 )	2.99 ( 29.3 )
AGRANULOCYTOSIS	BLOOD AND LYMPHATIC SYSTEM DISORDERS	24	1.8 ( 1.2 - 2.71 )	1.8 ( 8.14 )
HAEMORRHAGE	VASCULAR DISORDERS	24	0.36 ( 0.24 - 0.53 )	0.36 ( 27.56 )
SHOULDER ARTHROPLASTY	SURGICAL AND MEDICAL PROCEDURES	23	1 ( 0.66 - 1.52 )	1 ( 0 )
LUNG NEOPLASM MALIGNANT	NEOPLASMS BENIGN, MALIGNANT AND UNSPECIFIED (INCL CYSTS AND POLYPS)	23	0.33 ( 0.22 - 0.5 )	0.33 ( 30.65 )
ROAD TRAFFIC ACCIDENT	INJURY, POISONING AND PROCEDURAL COMPLICATIONS	23	0.26 ( 0.17 - 0.39 )	0.26 ( 47.63 )
ORAL PAIN	GASTROINTESTINAL DISORDERS	23	0.77 ( 0.51 - 1.16 )	0.77 ( 1.54 )
INTENTIONAL PRODUCT MISUSE	INJURY, POISONING AND PROCEDURAL COMPLICATIONS	23	0.2 ( 0.14 - 0.31 )	0.2 ( 70.96 )
CUTANEOUS VASCULITIS	SKIN AND SUBCUTANEOUS TISSUE DISORDERS	23	3.5 ( 2.28 - 5.38 )	3.5 ( 37.49 )
HYPOTHYROIDISM	ENDOCRINE DISORDERS	23	0.77 ( 0.51 - 1.17 )	0.77 ( 1.52 )
ORAL HERPES	INFECTIONS AND INFESTATIONS	23	0.39 ( 0.26 - 0.59 )	0.39 ( 21.55 )
UVEITIS	EYE DISORDERS	23	0.99 ( 0.66 - 1.5 )	0.99 ( 0 )
OVERDOSE	INJURY, POISONING AND PROCEDURAL COMPLICATIONS	22	0.49 ( 0.32 - 0.74 )	0.49 ( 11.75 )
DYSGEUSIA	NERVOUS SYSTEM DISORDERS	22	0.61 ( 0.4 - 0.93 )	0.61 ( 5.39 )
PULMONARY HYPERTENSION	RESPIRATORY, THORACIC AND MEDIASTINAL DISORDERS	22	1.38 ( 0.9 - 2.12 )	1.38 ( 2.25 )
TOOTH INFECTION	INFECTIONS AND INFESTATIONS	22	0.32 ( 0.21 - 0.49 )	0.32 ( 31.18 )
PNEUMOTHORAX	RESPIRATORY, THORACIC AND MEDIASTINAL DISORDERS	22	0.94 ( 0.62 - 1.44 )	0.94 ( 0.07 )
ACUTE RESPIRATORY DISTRESS SYNDROME	RESPIRATORY, THORACIC AND MEDIASTINAL DISORDERS	22	1.25 ( 0.82 - 1.92 )	1.25 ( 1.1 )
HYPERTENSIVE CRISIS	VASCULAR DISORDERS	22	1.59 ( 1.04 - 2.44 )	1.59 ( 4.67 )
CARDIAC DISORDER	CARDIAC DISORDERS	22	0.22 ( 0.14 - 0.33 )	0.22 ( 62.56 )
CYST	GENERAL DISORDERS AND ADMINISTRATION SITE CONDITIONS	22	0.44 ( 0.29 - 0.67 )	0.44 ( 15.51 )
HEPATIC FIBROSIS	HEPATOBILIARY DISORDERS	22	3.55 ( 2.29 - 5.49 )	3.54 ( 36.6 )
CARDIAC FAILURE CONGESTIVE	CARDIAC DISORDERS	22	0.34 ( 0.22 - 0.51 )	0.34 ( 28.74 )
GASTROENTERITIS	INFECTIONS AND INFESTATIONS	22	0.73 ( 0.48 - 1.12 )	0.73 ( 2.08 )
INFLAMMATORY MARKER INCREASED	INVESTIGATIONS	22	0.92 ( 0.61 - 1.41 )	0.92 ( 0.13 )
SWOLLEN TONGUE	GASTROINTESTINAL DISORDERS	22	0.96 ( 0.63 - 1.46 )	0.96 ( 0.04 )
HAEMOPTYSIS	RESPIRATORY, THORACIC AND MEDIASTINAL DISORDERS	22	0.99 ( 0.65 - 1.51 )	0.99 ( 0 )
SERONEGATIVE ARTHRITIS	MUSCULOSKELETAL AND CONNECTIVE TISSUE DISORDERS	22	2.87 ( 1.86 - 4.43 )	2.87 ( 24.77 )
INCORRECT ROUTE OF PRODUCT ADMINISTRATION	INJURY, POISONING AND PROCEDURAL COMPLICATIONS	22	1.25 ( 0.82 - 1.92 )	1.25 ( 1.08 )
COLITIS ULCERATIVE	GASTROINTESTINAL DISORDERS	21	0.79 ( 0.51 - 1.22 )	0.79 ( 1.13 )
ORAL CANDIDIASIS	INFECTIONS AND INFESTATIONS	21	0.96 ( 0.62 - 1.48 )	0.96 ( 0.04 )
BONE PAIN	MUSCULOSKELETAL AND CONNECTIVE TISSUE DISORDERS	21	0.33 ( 0.22 - 0.51 )	0.33 ( 27.92 )
TERMINAL STATE	GENERAL DISORDERS AND ADMINISTRATION SITE CONDITIONS	21	3.41 ( 2.18 - 5.34 )	3.41 ( 32.75 )
UROSEPSIS	INFECTIONS AND INFESTATIONS	21	1.24 ( 0.8 - 1.92 )	1.24 ( 0.95 )
TONGUE DISORDER	GASTROINTESTINAL DISORDERS	21	1.53 ( 0.99 - 2.37 )	1.53 ( 3.68 )
TREATMENT NONCOMPLIANCE	GENERAL DISORDERS AND ADMINISTRATION SITE CONDITIONS	21	0.88 ( 0.57 - 1.35 )	0.88 ( 0.35 )
BACK INJURY	INJURY, POISONING AND PROCEDURAL COMPLICATIONS	21	0.73 ( 0.48 - 1.13 )	0.73 ( 1.99 )
PROTEINURIA	RENAL AND URINARY DISORDERS	21	2.62 ( 1.68 - 4.09 )	2.62 ( 19.66 )
DRUG REACTION WITH EOSINOPHILIA AND SYSTEMIC SYMPTOMS	SKIN AND SUBCUTANEOUS TISSUE DISORDERS	20	3.21 ( 2.03 - 5.07 )	3.21 ( 27.92 )
SARCOIDOSIS	IMMUNE SYSTEM DISORDERS	20	1.31 ( 0.84 - 2.05 )	1.31 ( 1.45 )
LETHARGY	NERVOUS SYSTEM DISORDERS	20	0.58 ( 0.37 - 0.89 )	0.58 ( 6.18 )
ACUTE MYOCARDIAL INFARCTION	CARDIAC DISORDERS	20	0.71 ( 0.46 - 1.1 )	0.71 ( 2.34 )
DEMYELINATION	NERVOUS SYSTEM DISORDERS	20	1.4 ( 0.89 - 2.18 )	1.4 ( 2.17 )
CLOSTRIDIUM DIFFICILE INFECTION	INFECTIONS AND INFESTATIONS	20	0.78 ( 0.5 - 1.21 )	0.78 ( 1.28 )
ASCITES	GASTROINTESTINAL DISORDERS	20	1.45 ( 0.93 - 2.26 )	1.45 ( 2.65 )
LARYNGITIS	INFECTIONS AND INFESTATIONS	20	0.47 ( 0.3 - 0.72 )	0.47 ( 12.07 )
RETINAL TOXICITY	EYE DISORDERS	20	5.97 ( 3.72 - 9.58 )	5.97 ( 70.94 )
WALKING AID USER	SOCIAL CIRCUMSTANCES	20	0.7 ( 0.45 - 1.09 )	0.7 ( 2.49 )
NEURALGIA	NERVOUS SYSTEM DISORDERS	20	0.51 ( 0.33 - 0.79 )	0.51 ( 9.53 )
PLATELET COUNT INCREASED	INVESTIGATIONS	20	1.66 ( 1.06 - 2.6 )	1.66 ( 5.06 )
RHABDOMYOLYSIS	MUSCULOSKELETAL AND CONNECTIVE TISSUE DISORDERS	20	3.88 ( 2.45 - 6.16 )	3.88 ( 38.62 )
BREAST CANCER STAGE III	NEOPLASMS BENIGN, MALIGNANT AND UNSPECIFIED (INCL CYSTS AND POLYPS)	20	0.98 ( 0.63 - 1.53 )	0.98 ( 0.01 )
EOSINOPHILIA	BLOOD AND LYMPHATIC SYSTEM DISORDERS	20	3.05 ( 1.93 - 4.81 )	3.05 ( 25.34 )
TOOTHACHE	GASTROINTESTINAL DISORDERS	19	0.43 ( 0.27 - 0.68 )	0.43 ( 14.2 )
APHASIA	NERVOUS SYSTEM DISORDERS	19	0.98 ( 0.62 - 1.55 )	0.98 ( 0.01 )
BRONCHIECTASIS	RESPIRATORY, THORACIC AND MEDIASTINAL DISORDERS	19	0.94 ( 0.59 - 1.48 )	0.94 ( 0.08 )
LEUKOCYTOSIS	BLOOD AND LYMPHATIC SYSTEM DISORDERS	19	1.98 ( 1.25 - 3.15 )	1.98 ( 8.76 )
BLOOD TEST ABNORMAL	INVESTIGATIONS	19	0.67 ( 0.43 - 1.06 )	0.67 ( 3.01 )
TACHYPNOEA	RESPIRATORY, THORACIC AND MEDIASTINAL DISORDERS	19	5.86 ( 3.61 - 9.52 )	5.86 ( 65.9 )
TENDON DISORDER	MUSCULOSKELETAL AND CONNECTIVE TISSUE DISORDERS	19	1.2 ( 0.76 - 1.9 )	1.2 ( 0.63 )
THYROID NEOPLASM	NEOPLASMS BENIGN, MALIGNANT AND UNSPECIFIED (INCL CYSTS AND POLYPS)	19	1.76 ( 1.11 - 2.79 )	1.76 ( 5.93 )
RASH MACULAR	SKIN AND SUBCUTANEOUS TISSUE DISORDERS	19	0.38 ( 0.24 - 0.59 )	0.38 ( 19.49 )
PUSTULAR PSORIASIS	SKIN AND SUBCUTANEOUS TISSUE DISORDERS	19	1.4 ( 0.89 - 2.22 )	1.4 ( 2.11 )
IMMUNOSUPPRESSION	IMMUNE SYSTEM DISORDERS	19	0.55 ( 0.35 - 0.87 )	0.55 ( 6.88 )
PLEURISY	RESPIRATORY, THORACIC AND MEDIASTINAL DISORDERS	19	0.71 ( 0.45 - 1.12 )	0.71 ( 2.21 )
INJECTION SITE SWELLING	GENERAL DISORDERS AND ADMINISTRATION SITE CONDITIONS	19	0.04 ( 0.03 - 0.07 )	0.04 ( 416.52 )
FEAR OF INJECTION	PSYCHIATRIC DISORDERS	19	0.71 ( 0.45 - 1.12 )	0.71 ( 2.21 )
INAPPROPRIATE SCHEDULE OF PRODUCT ADMINISTRATION	INJURY, POISONING AND PROCEDURAL COMPLICATIONS	19	0.18 ( 0.11 - 0.28 )	0.18 ( 71.25 )
ORAL MUCOSAL EXFOLIATION	GASTROINTESTINAL DISORDERS	19	6.35 ( 3.9 - 10.34 )	6.35 ( 72.82 )
WHEELCHAIR USER	SOCIAL CIRCUMSTANCES	19	1.35 ( 0.86 - 2.14 )	1.35 ( 1.68 )
VASCULITIC RASH	SKIN AND SUBCUTANEOUS TISSUE DISORDERS	19	7.22 ( 4.41 - 11.82 )	7.22 ( 84.82 )
DRUG TOLERANCE	GENERAL DISORDERS AND ADMINISTRATION SITE CONDITIONS	19	1.99 ( 1.26 - 3.16 )	1.99 ( 8.92 )
PERIPHERAL VENOUS DISEASE	VASCULAR DISORDERS	19	0.74 ( 0.47 - 1.16 )	0.74 ( 1.73 )
AUTOIMMUNE DISORDER	IMMUNE SYSTEM DISORDERS	19	0.59 ( 0.38 - 0.93 )	0.59 ( 5.22 )
INCORRECT DOSE ADMINISTERED	INJURY, POISONING AND PROCEDURAL COMPLICATIONS	18	0.07 ( 0.05 - 0.12 )	0.07 ( 211.05 )
LUNG INFILTRATION	RESPIRATORY, THORACIC AND MEDIASTINAL DISORDERS	18	1.56 ( 0.97 - 2.5 )	1.56 ( 3.49 )
HYPOKINESIA	NERVOUS SYSTEM DISORDERS	18	0.85 ( 0.53 - 1.35 )	0.85 ( 0.48 )
PULMONARY ARTERIAL HYPERTENSION	RESPIRATORY, THORACIC AND MEDIASTINAL DISORDERS	18	5.41 ( 3.3 - 8.89 )	5.41 ( 56.33 )
ACUTE HEPATIC FAILURE	HEPATOBILIARY DISORDERS	18	4.42 ( 2.71 - 7.21 )	4.42 ( 42.43 )
MYCOBACTERIUM TUBERCULOSIS COMPLEX TEST POSITIVE	INVESTIGATIONS	18	1.32 ( 0.82 - 2.1 )	1.32 ( 1.31 )
PERICARDIAL EFFUSION	CARDIAC DISORDERS	18	0.73 ( 0.46 - 1.16 )	0.73 ( 1.78 )
FINE MOTOR SKILL DYSFUNCTION	NERVOUS SYSTEM DISORDERS	18	1.4 ( 0.88 - 2.25 )	1.4 ( 2.01 )
POLLAKIURIA	RENAL AND URINARY DISORDERS	18	0.48 ( 0.3 - 0.76 )	0.48 ( 10.26 )
BLOOD CREATINE PHOSPHOKINASE INCREASED	INVESTIGATIONS	18	1.72 ( 1.07 - 2.76 )	1.72 ( 5.16 )
GASTRITIS	GASTROINTESTINAL DISORDERS	18	0.44 ( 0.27 - 0.7 )	0.44 ( 12.91 )
INJECTION SITE PRURITUS	GENERAL DISORDERS AND ADMINISTRATION SITE CONDITIONS	18	0.04 ( 0.02 - 0.06 )	0.04 ( 455.69 )
JOINT DESTRUCTION	MUSCULOSKELETAL AND CONNECTIVE TISSUE DISORDERS	18	0.83 ( 0.52 - 1.32 )	0.83 ( 0.62 )
FRACTURE	INJURY, POISONING AND PROCEDURAL COMPLICATIONS	18	0.51 ( 0.32 - 0.81 )	0.51 ( 8.53 )
ANTINUCLEAR ANTIBODY POSITIVE	INVESTIGATIONS	18	1.71 ( 1.07 - 2.75 )	1.71 ( 5.11 )
SPINAL FUSION SURGERY	SURGICAL AND MEDICAL PROCEDURES	18	0.88 ( 0.55 - 1.41 )	0.88 ( 0.29 )
EATING DISORDER	PSYCHIATRIC DISORDERS	18	0.92 ( 0.58 - 1.47 )	0.92 ( 0.11 )
BONE DENSITY ABNORMAL	INVESTIGATIONS	18	2.75 ( 1.7 - 4.45 )	2.75 ( 18.67 )
HEPATOCELLULAR INJURY	HEPATOBILIARY DISORDERS	18	2.54 ( 1.57 - 4.09 )	2.54 ( 15.67 )
COAGULOPATHY	BLOOD AND LYMPHATIC SYSTEM DISORDERS	18	1.84 ( 1.14 - 2.95 )	1.84 ( 6.51 )
TINNITUS	EAR AND LABYRINTH DISORDERS	17	0.44 ( 0.27 - 0.71 )	0.44 ( 11.97 )
VAGINAL HAEMORRHAGE	REPRODUCTIVE SYSTEM AND BREAST DISORDERS	17	0.83 ( 0.52 - 1.35 )	0.83 ( 0.55 )
NECROSIS	GENERAL DISORDERS AND ADMINISTRATION SITE CONDITIONS	17	2.54 ( 1.55 - 4.15 )	2.54 ( 14.77 )
HYPOPHAGIA	METABOLISM AND NUTRITION DISORDERS	17	0.6 ( 0.37 - 0.96 )	0.6 ( 4.56 )
BLOOD PRESSURE DIASTOLIC DECREASED	INVESTIGATIONS	17	0.46 ( 0.29 - 0.75 )	0.46 ( 10.5 )
CARDIOMYOPATHY	CARDIAC DISORDERS	17	1.42 ( 0.87 - 2.3 )	1.42 ( 2.01 )
HYPOGLYCAEMIA	METABOLISM AND NUTRITION DISORDERS	17	1.05 ( 0.65 - 1.7 )	1.05 ( 0.04 )
PULMONARY CAVITATION	RESPIRATORY, THORACIC AND MEDIASTINAL DISORDERS	17	9.59 ( 5.62 - 16.37 )	9.59 ( 103.31 )
AGEUSIA	NERVOUS SYSTEM DISORDERS	17	1.42 ( 0.87 - 2.3 )	1.42 ( 2.01 )
FLATULENCE	GASTROINTESTINAL DISORDERS	17	0.54 ( 0.33 - 0.87 )	0.54 ( 6.54 )
MELAENA	GASTROINTESTINAL DISORDERS	17	1.5 ( 0.93 - 2.44 )	1.5 ( 2.76 )
INJECTION SITE RASH	GENERAL DISORDERS AND ADMINISTRATION SITE CONDITIONS	17	0.1 ( 0.06 - 0.16 )	0.1 ( 134.78 )
ACNE	SKIN AND SUBCUTANEOUS TISSUE DISORDERS	17	0.32 ( 0.2 - 0.52 )	0.32 ( 24.06 )
MOOD SWINGS	PSYCHIATRIC DISORDERS	17	1.33 ( 0.82 - 2.16 )	1.33 ( 1.35 )
FRACTURE DELAYED UNION	MUSCULOSKELETAL AND CONNECTIVE TISSUE DISORDERS	17	6.6 ( 3.93 - 11.07 )	6.6 ( 68.26 )
DISORIENTATION	PSYCHIATRIC DISORDERS	17	0.97 ( 0.6 - 1.57 )	0.97 ( 0.02 )
NEUTROPHIL COUNT DECREASED	INVESTIGATIONS	17	1.14 ( 0.7 - 1.84 )	1.14 ( 0.27 )
CARDIOVASCULAR DISORDER	CARDIAC DISORDERS	17	0.78 ( 0.48 - 1.26 )	0.78 ( 1.02 )
CARDIAC ARREST	CARDIAC DISORDERS	17	0.49 ( 0.3 - 0.79 )	0.49 ( 9.01 )
GASTROINTESTINAL PAIN	GASTROINTESTINAL DISORDERS	17	1.03 ( 0.64 - 1.68 )	1.03 ( 0.02 )
SQUAMOUS CELL CARCINOMA	NEOPLASMS BENIGN, MALIGNANT AND UNSPECIFIED (INCL CYSTS AND POLYPS)	17	0.67 ( 0.41 - 1.08 )	0.67 ( 2.75 )
ANTI-CYCLIC CITRULLINATED PEPTIDE ANTIBODY	INVESTIGATIONS	17	1.99 ( 1.22 - 3.24 )	1.99 ( 7.88 )
DEEP VEIN THROMBOSIS POSTOPERATIVE	INJURY, POISONING AND PROCEDURAL COMPLICATIONS	17	0.77 ( 0.48 - 1.25 )	0.77 ( 1.1 )
ENCEPHALOPATHY	NERVOUS SYSTEM DISORDERS	17	2.5 ( 1.53 - 4.09 )	2.5 ( 14.37 )
LUNG NEOPLASM	NEOPLASMS BENIGN, MALIGNANT AND UNSPECIFIED (INCL CYSTS AND POLYPS)	17	1.05 ( 0.65 - 1.7 )	1.05 ( 0.04 )
BLOOD POTASSIUM DECREASED	INVESTIGATIONS	16	0.46 ( 0.28 - 0.75 )	0.46 ( 9.97 )
HEPATOMEGALY	HEPATOBILIARY DISORDERS	16	1.68 ( 1.02 - 2.78 )	1.68 ( 4.24 )
MENTAL DISORDER	PSYCHIATRIC DISORDERS	16	0.78 ( 0.48 - 1.28 )	0.78 ( 0.97 )
CONJUNCTIVITIS	INFECTIONS AND INFESTATIONS	16	0.66 ( 0.4 - 1.08 )	0.66 ( 2.74 )
RETINOPATHY	EYE DISORDERS	16	3.59 ( 2.15 - 6 )	3.59 ( 27.15 )
HIP FRACTURE	INJURY, POISONING AND PROCEDURAL COMPLICATIONS	16	0.25 ( 0.15 - 0.41 )	0.25 ( 36.25 )
TOOTH ABSCESS	INFECTIONS AND INFESTATIONS	16	0.38 ( 0.23 - 0.61 )	0.38 ( 16.43 )
SKIN DISCOLOURATION	SKIN AND SUBCUTANEOUS TISSUE DISORDERS	16	0.22 ( 0.13 - 0.35 )	0.22 ( 44.99 )
BLOOD PRESSURE DECREASED	INVESTIGATIONS	16	0.36 ( 0.22 - 0.58 )	0.36 ( 18.32 )
ARTHRITIS INFECTIVE	INFECTIONS AND INFESTATIONS	16	0.47 ( 0.28 - 0.76 )	0.47 ( 9.64 )
CARDIO-RESPIRATORY ARREST	CARDIAC DISORDERS	16	1.15 ( 0.7 - 1.9 )	1.15 ( 0.31 )
INJECTION SITE INFLAMMATION	GENERAL DISORDERS AND ADMINISTRATION SITE CONDITIONS	16	0.87 ( 0.53 - 1.42 )	0.87 ( 0.33 )
INTERNATIONAL NORMALISED RATIO FLUCTUATION	INVESTIGATIONS	16	4.58 ( 2.72 - 7.71 )	4.58 ( 39.77 )
GASTROINTESTINAL TOXICITY	GASTROINTESTINAL DISORDERS	16	2.92 ( 1.75 - 4.85 )	2.92 ( 18.64 )
SKIN PAPILLOMA	NEOPLASMS BENIGN, MALIGNANT AND UNSPECIFIED (INCL CYSTS AND POLYPS)	16	1.15 ( 0.7 - 1.9 )	1.15 ( 0.31 )
SPINAL DISORDER	MUSCULOSKELETAL AND CONNECTIVE TISSUE DISORDERS	16	0.47 ( 0.29 - 0.77 )	0.47 ( 9.28 )
HERNIA	GENERAL DISORDERS AND ADMINISTRATION SITE CONDITIONS	16	0.32 ( 0.19 - 0.52 )	0.32 ( 23.34 )
THROAT TIGHTNESS	RESPIRATORY, THORACIC AND MEDIASTINAL DISORDERS	16	0.66 ( 0.4 - 1.08 )	0.66 ( 2.78 )
ANGINA PECTORIS	CARDIAC DISORDERS	16	0.49 ( 0.3 - 0.8 )	0.49 ( 8.35 )
HAEMATURIA	RENAL AND URINARY DISORDERS	16	0.92 ( 0.56 - 1.5 )	0.92 ( 0.12 )
HIATUS HERNIA	GASTROINTESTINAL DISORDERS	16	0.56 ( 0.34 - 0.92 )	0.56 ( 5.3 )
SKIN LACERATION	INJURY, POISONING AND PROCEDURAL COMPLICATIONS	16	0.5 ( 0.3 - 0.82 )	0.5 ( 7.94 )
MALIGNANT MELANOMA	NEOPLASMS BENIGN, MALIGNANT AND UNSPECIFIED (INCL CYSTS AND POLYPS)	16	0.4 ( 0.25 - 0.66 )	0.4 ( 13.86 )
TRANSIENT ISCHAEMIC ATTACK	NERVOUS SYSTEM DISORDERS	15	0.37 ( 0.23 - 0.62 )	0.37 ( 15.53 )
ACUTE RESPIRATORY FAILURE	RESPIRATORY, THORACIC AND MEDIASTINAL DISORDERS	15	1 ( 0.6 - 1.67 )	1 ( 0 )
BLOOD PRESSURE ABNORMAL	INVESTIGATIONS	15	0.49 ( 0.3 - 0.82 )	0.49 ( 7.65 )
FLUSHING	VASCULAR DISORDERS	15	0.31 ( 0.19 - 0.51 )	0.31 ( 23.09 )
DUODENAL ULCER	GASTROINTESTINAL DISORDERS	15	2.11 ( 1.26 - 3.56 )	2.11 ( 8.33 )
LYMPHOCYTE COUNT DECREASED	INVESTIGATIONS	15	1.65 ( 0.98 - 2.76 )	1.65 ( 3.63 )
MENINGITIS	INFECTIONS AND INFESTATIONS	15	1.19 ( 0.71 - 1.99 )	1.19 ( 0.45 )
ROTATOR CUFF SYNDROME	MUSCULOSKELETAL AND CONNECTIVE TISSUE DISORDERS	15	0.26 ( 0.16 - 0.43 )	0.26 ( 31.59 )
ANKYLOSING SPONDYLITIS	MUSCULOSKELETAL AND CONNECTIVE TISSUE DISORDERS	15	0.95 ( 0.57 - 1.59 )	0.95 ( 0.03 )
IMPAIRED GASTRIC EMPTYING	GASTROINTESTINAL DISORDERS	15	1.55 ( 0.93 - 2.6 )	1.55 ( 2.82 )
PLEURAL FIBROSIS	RESPIRATORY, THORACIC AND MEDIASTINAL DISORDERS	15	2.2 ( 1.31 - 3.71 )	2.2 ( 9.26 )
MOVEMENT DISORDER	NERVOUS SYSTEM DISORDERS	15	0.37 ( 0.22 - 0.61 )	0.37 ( 16.14 )
NEUTROPHIL COUNT INCREASED	INVESTIGATIONS	15	2.27 ( 1.34 - 3.82 )	2.27 ( 9.97 )
VIRAL INFECTION	INFECTIONS AND INFESTATIONS	15	0.19 ( 0.12 - 0.32 )	0.19 ( 50.12 )
HYPERSENSITIVITY VASCULITIS	SKIN AND SUBCUTANEOUS TISSUE DISORDERS	15	4.16 ( 2.44 - 7.11 )	4.16 ( 32.34 )
ABSCESS	INFECTIONS AND INFESTATIONS	15	0.5 ( 0.3 - 0.83 )	0.5 ( 7.36 )
POOR QUALITY SLEEP	PSYCHIATRIC DISORDERS	15	0.67 ( 0.4 - 1.12 )	0.67 ( 2.39 )
C-REACTIVE PROTEIN	INVESTIGATIONS	15	1.32 ( 0.79 - 2.22 )	1.32 ( 1.15 )
SPINAL OSTEOARTHRITIS	MUSCULOSKELETAL AND CONNECTIVE TISSUE DISORDERS	15	0.53 ( 0.32 - 0.89 )	0.53 ( 6.08 )
PYELONEPHRITIS	INFECTIONS AND INFESTATIONS	15	0.79 ( 0.47 - 1.32 )	0.79 ( 0.81 )
RHEUMATOID FACTOR NEGATIVE	INVESTIGATIONS	15	4.2 ( 2.46 - 7.16 )	4.2 ( 32.72 )
MYELODYSPLASTIC SYNDROME	NEOPLASMS BENIGN, MALIGNANT AND UNSPECIFIED (INCL CYSTS AND POLYPS)	15	1.18 ( 0.71 - 1.98 )	1.18 ( 0.41 )
IMMUNE SYSTEM DISORDER	IMMUNE SYSTEM DISORDERS	15	0.36 ( 0.22 - 0.6 )	0.36 ( 16.89 )
LIMB OPERATION	SURGICAL AND MEDICAL PROCEDURES	15	0.56 ( 0.34 - 0.94 )	0.56 ( 5.04 )
PURPURA	SKIN AND SUBCUTANEOUS TISSUE DISORDERS	15	1.98 ( 1.18 - 3.32 )	1.98 ( 6.85 )
CORONARY ARTERY DISEASE	CARDIAC DISORDERS	15	0.48 ( 0.29 - 0.79 )	0.48 ( 8.58 )
ELECTROLYTE IMBALANCE	METABOLISM AND NUTRITION DISORDERS	15	3.13 ( 1.85 - 5.3 )	3.13 ( 20 )
ONYCHOMYCOSIS	INFECTIONS AND INFESTATIONS	15	0.6 ( 0.36 - 1 )	0.6 ( 3.97 )
BLOOD SODIUM DECREASED	INVESTIGATIONS	14	0.79 ( 0.47 - 1.35 )	0.79 ( 0.73 )
ARTHRITIS BACTERIAL	INFECTIONS AND INFESTATIONS	14	0.53 ( 0.31 - 0.89 )	0.53 ( 5.82 )
AUTOIMMUNE HEPATITIS	HEPATOBILIARY DISORDERS	14	1.84 ( 1.07 - 3.14 )	1.84 ( 5.08 )
PROTEIN URINE PRESENT	INVESTIGATIONS	14	3.44 ( 1.99 - 5.95 )	3.44 ( 22.09 )
COGNITIVE DISORDER	NERVOUS SYSTEM DISORDERS	14	0.88 ( 0.52 - 1.5 )	0.88 ( 0.22 )
PROGRESSIVE MULTIFOCAL LEUKOENCEPHALOPATHY	INFECTIONS AND INFESTATIONS	14	1.65 ( 0.96 - 2.81 )	1.65 ( 3.39 )
CUTANEOUS LUPUS ERYTHEMATOSUS	SKIN AND SUBCUTANEOUS TISSUE DISORDERS	14	2.24 ( 1.3 - 3.84 )	2.24 ( 9.01 )
PULMONARY TUBERCULOSIS	INFECTIONS AND INFESTATIONS	14	0.65 ( 0.38 - 1.1 )	0.65 ( 2.57 )
SKIN MASS	SKIN AND SUBCUTANEOUS TISSUE DISORDERS	14	0.79 ( 0.46 - 1.34 )	0.79 ( 0.78 )
CHOLECYSTITIS	HEPATOBILIARY DISORDERS	14	0.98 ( 0.58 - 1.67 )	0.98 ( 0 )
POSTERIOR REVERSIBLE ENCEPHALOPATHY SYNDROME	NERVOUS SYSTEM DISORDERS	14	5.74 ( 3.27 - 10.09 )	5.74 ( 47.3 )
HAEMATEMESIS	GASTROINTESTINAL DISORDERS	14	0.82 ( 0.48 - 1.39 )	0.82 ( 0.56 )
BLOOD POTASSIUM INCREASED	INVESTIGATIONS	14	1.53 ( 0.89 - 2.61 )	1.53 ( 2.44 )
HEART RATE IRREGULAR	INVESTIGATIONS	14	0.51 ( 0.3 - 0.86 )	0.51 ( 6.55 )
POST PROCEDURAL INFECTION	INFECTIONS AND INFESTATIONS	14	0.35 ( 0.2 - 0.58 )	0.35 ( 17.24 )
ATELECTASIS	RESPIRATORY, THORACIC AND MEDIASTINAL DISORDERS	14	1.31 ( 0.77 - 2.23 )	1.31 ( 0.99 )
LIMB INJURY	INJURY, POISONING AND PROCEDURAL COMPLICATIONS	14	0.17 ( 0.1 - 0.29 )	0.17 ( 55.49 )
HYPOACUSIS	EAR AND LABYRINTH DISORDERS	14	0.26 ( 0.15 - 0.44 )	0.26 ( 29.49 )
BRONCHOSPASM	RESPIRATORY, THORACIC AND MEDIASTINAL DISORDERS	14	1.36 ( 0.8 - 2.32 )	1.36 ( 1.3 )
COMA	NERVOUS SYSTEM DISORDERS	14	0.67 ( 0.39 - 1.14 )	0.67 ( 2.25 )
OVARIAN CANCER	NEOPLASMS BENIGN, MALIGNANT AND UNSPECIFIED (INCL CYSTS AND POLYPS)	14	1.05 ( 0.62 - 1.79 )	1.05 ( 0.04 )
GRANULOMA	GENERAL DISORDERS AND ADMINISTRATION SITE CONDITIONS	14	1.74 ( 1.02 - 2.97 )	1.74 ( 4.17 )
DRUG RESISTANCE	GENERAL DISORDERS AND ADMINISTRATION SITE CONDITIONS	14	1.64 ( 0.96 - 2.79 )	1.64 ( 3.31 )
FLUID RETENTION	METABOLISM AND NUTRITION DISORDERS	14	0.27 ( 0.16 - 0.46 )	0.27 ( 26.66 )
BLOOD TRIGLYCERIDES INCREASED	INVESTIGATIONS	14	1.05 ( 0.62 - 1.79 )	1.05 ( 0.03 )
PSEUDOMONAS INFECTION	INFECTIONS AND INFESTATIONS	14	1.6 ( 0.94 - 2.73 )	1.6 ( 3.01 )
RAYNAUD'S PHENOMENON	VASCULAR DISORDERS	14	1.25 ( 0.74 - 2.14 )	1.25 ( 0.7 )
NEUTROPHIL PERCENTAGE INCREASED	INVESTIGATIONS	14	18.05 ( 9.5 - 34.28 )	18.05 ( 150.28 )
PROTEIN TOTAL DECREASED	INVESTIGATIONS	14	4.91 ( 2.81 - 8.57 )	4.91 ( 38.33 )
LYMPHOCYTE PERCENTAGE DECREASED	INVESTIGATIONS	14	16.3 ( 8.67 - 30.64 )	16.3 ( 138.5 )
HEMIPARESIS	NERVOUS SYSTEM DISORDERS	13	1 ( 0.57 - 1.73 )	1 ( 0 )
SCAB	SKIN AND SUBCUTANEOUS TISSUE DISORDERS	13	0.72 ( 0.41 - 1.24 )	0.72 ( 1.43 )
DRY SKIN	SKIN AND SUBCUTANEOUS TISSUE DISORDERS	13	0.19 ( 0.11 - 0.33 )	0.19 ( 43.5 )
OSTEONECROSIS OF JAW	MUSCULOSKELETAL AND CONNECTIVE TISSUE DISORDERS	13	0.84 ( 0.49 - 1.46 )	0.84 ( 0.37 )
MATERNAL EXPOSURE BEFORE PREGNANCY	INJURY, POISONING AND PROCEDURAL COMPLICATIONS	13	0.72 ( 0.42 - 1.25 )	0.72 ( 1.38 )
ESCHERICHIA INFECTION	INFECTIONS AND INFESTATIONS	13	0.97 ( 0.56 - 1.68 )	0.97 ( 0.01 )
SUBCUTANEOUS ABSCESS	INFECTIONS AND INFESTATIONS	13	1.04 ( 0.6 - 1.8 )	1.04 ( 0.02 )
HYPERKERATOSIS	SKIN AND SUBCUTANEOUS TISSUE DISORDERS	13	0.76 ( 0.44 - 1.32 )	0.76 ( 0.95 )
HEPATITIS ACUTE	HEPATOBILIARY DISORDERS	13	5.39 ( 3.01 - 9.66 )	5.39 ( 40.47 )
BREAST CANCER FEMALE	NEOPLASMS BENIGN, MALIGNANT AND UNSPECIFIED (INCL CYSTS AND POLYPS)	13	0.68 ( 0.39 - 1.17 )	0.68 ( 2 )
TOOTH FRACTURE	INJURY, POISONING AND PROCEDURAL COMPLICATIONS	13	0.39 ( 0.22 - 0.67 )	0.39 ( 12.58 )
INJECTION SITE BRUISING	GENERAL DISORDERS AND ADMINISTRATION SITE CONDITIONS	13	0.04 ( 0.02 - 0.06 )	0.04 ( 321.61 )
DYSURIA	RENAL AND URINARY DISORDERS	13	0.34 ( 0.2 - 0.58 )	0.34 ( 16.8 )
DISTURBANCE IN ATTENTION	NERVOUS SYSTEM DISORDERS	13	0.71 ( 0.41 - 1.22 )	0.71 ( 1.55 )
SKIN CANCER	NEOPLASMS BENIGN, MALIGNANT AND UNSPECIFIED (INCL CYSTS AND POLYPS)	13	0.2 ( 0.12 - 0.35 )	0.2 ( 39.97 )
NERVOUS SYSTEM DISORDER	NERVOUS SYSTEM DISORDERS	13	0.57 ( 0.33 - 0.99 )	0.57 ( 4.08 )
RED BLOOD CELL SEDIMENTATION RATE	INVESTIGATIONS	13	2.68 ( 1.53 - 4.71 )	2.68 ( 12.76 )
DIPLOPIA	EYE DISORDERS	13	0.7 ( 0.4 - 1.21 )	0.7 ( 1.65 )
RED CELL DISTRIBUTION WIDTH INCREASED	INVESTIGATIONS	13	2.35 ( 1.34 - 4.11 )	2.35 ( 9.43 )
BRONCHITIS CHRONIC	RESPIRATORY, THORACIC AND MEDIASTINAL DISORDERS	13	1.01 ( 0.58 - 1.75 )	1.01 ( 0 )
BODY TEMPERATURE DECREASED	INVESTIGATIONS	13	0.46 ( 0.26 - 0.79 )	0.46 ( 8.36 )
BACTERIAL INFECTION	INFECTIONS AND INFESTATIONS	13	0.33 ( 0.19 - 0.58 )	0.33 ( 17.02 )
PETECHIAE	SKIN AND SUBCUTANEOUS TISSUE DISORDERS	13	1.61 ( 0.92 - 2.8 )	1.61 ( 2.85 )
METABOLIC ACIDOSIS	METABOLISM AND NUTRITION DISORDERS	13	2.01 ( 1.15 - 3.51 )	2.01 ( 6.21 )
RASH PAPULAR	SKIN AND SUBCUTANEOUS TISSUE DISORDERS	13	0.32 ( 0.19 - 0.56 )	0.32 ( 18.35 )
ONYCHOMADESIS	SKIN AND SUBCUTANEOUS TISSUE DISORDERS	13	0.85 ( 0.49 - 1.47 )	0.85 ( 0.36 )
HYPOCALCAEMIA	METABOLISM AND NUTRITION DISORDERS	13	2.02 ( 1.16 - 3.54 )	2.02 ( 6.36 )
MYELOSUPPRESSION	BLOOD AND LYMPHATIC SYSTEM DISORDERS	13	1.6 ( 0.92 - 2.79 )	1.6 ( 2.81 )
VISUAL ACUITY REDUCED	EYE DISORDERS	12	0.45 ( 0.25 - 0.79 )	0.45 ( 8.18 )
NERVE INJURY	INJURY, POISONING AND PROCEDURAL COMPLICATIONS	12	0.49 ( 0.28 - 0.87 )	0.49 ( 6.25 )
DEPRESSED MOOD	PSYCHIATRIC DISORDERS	12	0.2 ( 0.11 - 0.35 )	0.2 ( 38.84 )
PNEUMONIA BACTERIAL	INFECTIONS AND INFESTATIONS	12	0.67 ( 0.38 - 1.18 )	0.67 ( 1.95 )
DERMATITIS BULLOUS	SKIN AND SUBCUTANEOUS TISSUE DISORDERS	12	3.58 ( 1.98 - 6.48 )	3.58 ( 20.29 )
PRODUCT SUBSTITUTION ISSUE	PRODUCT ISSUES	12	1.17 ( 0.66 - 2.08 )	1.17 ( 0.29 )
HEPATITIS B	INFECTIONS AND INFESTATIONS	12	1.16 ( 0.65 - 2.06 )	1.16 ( 0.26 )
ABNORMAL LOSS OF WEIGHT	METABOLISM AND NUTRITION DISORDERS	12	1.66 ( 0.93 - 2.96 )	1.66 ( 3.01 )
BONE SWELLING	MUSCULOSKELETAL AND CONNECTIVE TISSUE DISORDERS	12	2.24 ( 1.25 - 4.02 )	2.24 ( 7.79 )
INTERNATIONAL NORMALISED RATIO INCREASED	INVESTIGATIONS	12	1.77 ( 0.99 - 3.16 )	1.77 ( 3.81 )
LUNG ABSCESS	INFECTIONS AND INFESTATIONS	12	2.35 ( 1.31 - 4.22 )	2.35 ( 8.77 )
HYPERGLYCAEMIA	METABOLISM AND NUTRITION DISORDERS	12	1.17 ( 0.66 - 2.08 )	1.17 ( 0.29 )
NERVOUSNESS	PSYCHIATRIC DISORDERS	12	0.25 ( 0.14 - 0.43 )	0.25 ( 27.7 )
ISCHAEMIC STROKE	NERVOUS SYSTEM DISORDERS	12	1.04 ( 0.59 - 1.85 )	1.04 ( 0.02 )
JOINT LAXITY	MUSCULOSKELETAL AND CONNECTIVE TISSUE DISORDERS	12	3.61 ( 1.99 - 6.53 )	3.61 ( 20.58 )
LIMB DEFORMITY	MUSCULOSKELETAL AND CONNECTIVE TISSUE DISORDERS	12	0.91 ( 0.51 - 1.61 )	0.91 ( 0.1 )
POOR VENOUS ACCESS	VASCULAR DISORDERS	12	0.55 ( 0.31 - 0.98 )	0.55 ( 4.23 )
ECCHYMOSIS	SKIN AND SUBCUTANEOUS TISSUE DISORDERS	12	1.67 ( 0.93 - 2.97 )	1.67 ( 3.05 )
HALLUCINATION	PSYCHIATRIC DISORDERS	12	0.76 ( 0.43 - 1.34 )	0.76 ( 0.9 )
GUILLAIN-BARRE SYNDROME	NERVOUS SYSTEM DISORDERS	12	2.19 ( 1.22 - 3.92 )	2.19 ( 7.29 )
DEPRESSED LEVEL OF CONSCIOUSNESS	NERVOUS SYSTEM DISORDERS	12	1.32 ( 0.74 - 2.34 )	1.32 ( 0.88 )
HYPERTRANSAMINASAEMIA	HEPATOBILIARY DISORDERS	12	3.7 ( 2.04 - 6.71 )	3.7 ( 21.46 )
SLEEP DISORDER DUE TO A GENERAL MEDICAL CONDITION	PSYCHIATRIC DISORDERS	12	1.69 ( 0.95 - 3.02 )	1.69 ( 3.24 )
ESCHERICHIA URINARY TRACT INFECTION	INFECTIONS AND INFESTATIONS	12	1.14 ( 0.64 - 2.02 )	1.14 ( 0.2 )
AGITATION	PSYCHIATRIC DISORDERS	12	0.75 ( 0.42 - 1.33 )	0.75 ( 0.97 )
RESPIRATORY DISTRESS	RESPIRATORY, THORACIC AND MEDIASTINAL DISORDERS	12	0.79 ( 0.45 - 1.41 )	0.79 ( 0.62 )
HEPATIC NECROSIS	HEPATOBILIARY DISORDERS	12	8.66 ( 4.61 - 16.27 )	8.66 ( 65.59 )
HYPOALBUMINAEMIA	METABOLISM AND NUTRITION DISORDERS	11	2.96 ( 1.6 - 5.48 )	2.96 ( 13.22 )
CYTOPENIA	BLOOD AND LYMPHATIC SYSTEM DISORDERS	11	1.82 ( 0.99 - 3.34 )	1.82 ( 3.88 )
RALES	RESPIRATORY, THORACIC AND MEDIASTINAL DISORDERS	11	1.2 ( 0.66 - 2.18 )	1.2 ( 0.34 )
PNEUMONIA VIRAL	INFECTIONS AND INFESTATIONS	11	1.05 ( 0.58 - 1.92 )	1.05 ( 0.03 )
APHTHOUS ULCER	GASTROINTESTINAL DISORDERS	11	0.66 ( 0.36 - 1.2 )	0.66 ( 1.9 )
SKIN FISSURES	SKIN AND SUBCUTANEOUS TISSUE DISORDERS	11	0.76 ( 0.42 - 1.38 )	0.76 ( 0.84 )
CRYING	GENERAL DISORDERS AND ADMINISTRATION SITE CONDITIONS	11	0.48 ( 0.26 - 0.87 )	0.48 ( 6.11 )
WRIST DEFORMITY	MUSCULOSKELETAL AND CONNECTIVE TISSUE DISORDERS	11	1.12 ( 0.61 - 2.03 )	1.12 ( 0.13 )
HAEMOLYTIC ANAEMIA	BLOOD AND LYMPHATIC SYSTEM DISORDERS	11	3.42 ( 1.84 - 6.35 )	3.42 ( 17.23 )
ANKLE ARTHROPLASTY	SURGICAL AND MEDICAL PROCEDURES	11	2.36 ( 1.28 - 4.35 )	2.36 ( 8.12 )
PULMONARY CONGESTION	RESPIRATORY, THORACIC AND MEDIASTINAL DISORDERS	11	0.47 ( 0.26 - 0.86 )	0.47 ( 6.41 )
BLOOD URIC ACID INCREASED	INVESTIGATIONS	11	2.35 ( 1.28 - 4.32 )	2.35 ( 8 )
TOOTH LOSS	GASTROINTESTINAL DISORDERS	11	0.82 ( 0.45 - 1.5 )	0.82 ( 0.41 )
IRRITABILITY	PSYCHIATRIC DISORDERS	11	0.57 ( 0.31 - 1.03 )	0.57 ( 3.62 )
ACUTE MYELOID LEUKAEMIA	NEOPLASMS BENIGN, MALIGNANT AND UNSPECIFIED (INCL CYSTS AND POLYPS)	11	1.41 ( 0.77 - 2.58 )	1.41 ( 1.28 )
POST PROCEDURAL COMPLICATION	INJURY, POISONING AND PROCEDURAL COMPLICATIONS	11	0.24 ( 0.13 - 0.44 )	0.24 ( 26.15 )
LYMPHOEDEMA	VASCULAR DISORDERS	11	1.07 ( 0.59 - 1.94 )	1.07 ( 0.05 )
DYSPHONIA	RESPIRATORY, THORACIC AND MEDIASTINAL DISORDERS	11	0.14 ( 0.08 - 0.25 )	0.14 ( 59.87 )
DYSARTHRIA	NERVOUS SYSTEM DISORDERS	11	0.63 ( 0.35 - 1.15 )	0.63 ( 2.28 )
OSTEOPOROTIC FRACTURE	MUSCULOSKELETAL AND CONNECTIVE TISSUE DISORDERS	11	1.47 ( 0.8 - 2.69 )	1.47 ( 1.59 )
INVESTIGATION ABNORMAL	INVESTIGATIONS	11	1.82 ( 0.99 - 3.34 )	1.82 ( 3.88 )
DISSEMINATED INTRAVASCULAR COAGULATION	BLOOD AND LYMPHATIC SYSTEM DISORDERS	11	0.83 ( 0.46 - 1.51 )	0.83 ( 0.36 )
INTERVERTEBRAL DISC DEGENERATION	MUSCULOSKELETAL AND CONNECTIVE TISSUE DISORDERS	11	0.32 ( 0.18 - 0.59 )	0.32 ( 15.37 )
OESOPHAGEAL ULCER	GASTROINTESTINAL DISORDERS	11	3.31 ( 1.78 - 6.14 )	3.31 ( 16.23 )
ENDODONTIC PROCEDURE	SURGICAL AND MEDICAL PROCEDURES	11	1.23 ( 0.67 - 2.23 )	1.23 ( 0.44 )
CARDIAC MURMUR	INVESTIGATIONS	11	1.02 ( 0.56 - 1.85 )	1.02 ( 0 )
SYSTEMIC LUPUS ERYTHEMATOSUS RASH	SKIN AND SUBCUTANEOUS TISSUE DISORDERS	11	1.67 ( 0.91 - 3.05 )	1.67 ( 2.81 )
SPINAL COMPRESSION FRACTURE	INJURY, POISONING AND PROCEDURAL COMPLICATIONS	11	0.47 ( 0.26 - 0.86 )	0.47 ( 6.37 )
JOINT NOISE	MUSCULOSKELETAL AND CONNECTIVE TISSUE DISORDERS	11	1.12 ( 0.62 - 2.05 )	1.12 ( 0.15 )
RENAL CYST	RENAL AND URINARY DISORDERS	11	0.76 ( 0.42 - 1.38 )	0.76 ( 0.84 )
FACIAL PARALYSIS	NERVOUS SYSTEM DISORDERS	11	1.1 ( 0.61 - 2.01 )	1.1 ( 0.1 )
PAIN IN JAW	MUSCULOSKELETAL AND CONNECTIVE TISSUE DISORDERS	11	0.27 ( 0.15 - 0.48 )	0.27 ( 21.86 )
SMEAR CERVIX ABNORMAL	INVESTIGATIONS	11	2.78 ( 1.5 - 5.13 )	2.78 ( 11.61 )
LYMPHOPENIA	BLOOD AND LYMPHATIC SYSTEM DISORDERS	11	1.23 ( 0.68 - 2.25 )	1.23 ( 0.47 )
PREMATURE BABY	PREGNANCY, PUERPERIUM AND PERINATAL CONDITIONS	11	1.2 ( 0.66 - 2.19 )	1.2 ( 0.36 )
SINUS TACHYCARDIA	CARDIAC DISORDERS	11	2.09 ( 1.14 - 3.84 )	2.09 ( 5.91 )
RASH VESICULAR	SKIN AND SUBCUTANEOUS TISSUE DISORDERS	11	1.12 ( 0.61 - 2.03 )	1.12 ( 0.13 )
PALLOR	VASCULAR DISORDERS	11	0.59 ( 0.33 - 1.07 )	0.59 ( 3.09 )
PRODUCT LABEL CONFUSION	INJURY, POISONING AND PROCEDURAL COMPLICATIONS	11	1.48 ( 0.81 - 2.71 )	1.48 ( 1.65 )
TRAUMATIC LUNG INJURY	INJURY, POISONING AND PROCEDURAL COMPLICATIONS	11	2.92 ( 1.58 - 5.4 )	2.92 ( 12.84 )
POLYMYOSITIS	MUSCULOSKELETAL AND CONNECTIVE TISSUE DISORDERS	11	2.76 ( 1.49 - 5.09 )	2.76 ( 11.44 )
RIB FRACTURE	INJURY, POISONING AND PROCEDURAL COMPLICATIONS	10	0.22 ( 0.12 - 0.41 )	0.22 ( 27.91 )
UPPER LIMB FRACTURE	INJURY, POISONING AND PROCEDURAL COMPLICATIONS	10	0.16 ( 0.09 - 0.3 )	0.16 ( 43.02 )
OCULAR HYPERAEMIA	EYE DISORDERS	10	0.29 ( 0.15 - 0.53 )	0.29 ( 17.79 )
BACTERAEMIA	INFECTIONS AND INFESTATIONS	10	1.06 ( 0.57 - 1.99 )	1.06 ( 0.03 )
DERMATITIS EXFOLIATIVE	SKIN AND SUBCUTANEOUS TISSUE DISORDERS	10	5.55 ( 2.85 - 10.81 )	5.55 ( 32.35 )
CHEST X-RAY ABNORMAL	INVESTIGATIONS	10	1.16 ( 0.62 - 2.18 )	1.16 ( 0.22 )
OSTEONECROSIS	MUSCULOSKELETAL AND CONNECTIVE TISSUE DISORDERS	10	0.59 ( 0.32 - 1.11 )	0.59 ( 2.74 )
PROCEDURAL PAIN	INJURY, POISONING AND PROCEDURAL COMPLICATIONS	10	0.21 ( 0.11 - 0.4 )	0.21 ( 28.91 )
C-REACTIVE PROTEIN DECREASED	INVESTIGATIONS	10	2.17 ( 1.15 - 4.12 )	2.17 ( 5.98 )
POSTOPERATIVE WOUND INFECTION	INFECTIONS AND INFESTATIONS	10	0.31 ( 0.16 - 0.57 )	0.31 ( 15.5 )
ONYCHOCLASIS	SKIN AND SUBCUTANEOUS TISSUE DISORDERS	10	0.91 ( 0.49 - 1.7 )	0.91 ( 0.09 )
GENERALISED OEDEMA	GENERAL DISORDERS AND ADMINISTRATION SITE CONDITIONS	10	0.75 ( 0.4 - 1.4 )	0.75 ( 0.83 )
SLEEP APNOEA SYNDROME	RESPIRATORY, THORACIC AND MEDIASTINAL DISORDERS	10	0.39 ( 0.21 - 0.73 )	0.39 ( 9.27 )
BLINDNESS	EYE DISORDERS	10	0.23 ( 0.12 - 0.43 )	0.23 ( 25.23 )
INTESTINAL PERFORATION	GASTROINTESTINAL DISORDERS	10	0.55 ( 0.3 - 1.03 )	0.55 ( 3.59 )
THERAPEUTIC RESPONSE SHORTENED	GENERAL DISORDERS AND ADMINISTRATION SITE CONDITIONS	10	0.2 ( 0.11 - 0.38 )	0.2 ( 31.45 )
ABDOMINAL TENDERNESS	GASTROINTESTINAL DISORDERS	10	2.15 ( 1.14 - 4.07 )	2.15 ( 5.79 )
HERPES SIMPLEX	INFECTIONS AND INFESTATIONS	10	0.94 ( 0.5 - 1.75 )	0.94 ( 0.04 )
LATENT TUBERCULOSIS	INFECTIONS AND INFESTATIONS	10	1 ( 0.53 - 1.87 )	1 ( 0 )
EMPYEMA	INFECTIONS AND INFESTATIONS	10	1.75 ( 0.93 - 3.31 )	1.75 ( 3.08 )
ANKLE DEFORMITY	MUSCULOSKELETAL AND CONNECTIVE TISSUE DISORDERS	10	2.42 ( 1.28 - 4.6 )	2.42 ( 7.83 )
ANTICIPATORY ANXIETY	PSYCHIATRIC DISORDERS	10	3.19 ( 1.67 - 6.1 )	3.19 ( 13.85 )
EXTREMITY CONTRACTURE	MUSCULOSKELETAL AND CONNECTIVE TISSUE DISORDERS	10	4.57 ( 2.37 - 8.82 )	4.57 ( 24.74 )
ORAL DISORDER	GASTROINTESTINAL DISORDERS	10	0.77 ( 0.41 - 1.43 )	0.77 ( 0.7 )
MULTIPLE ALLERGIES	IMMUNE SYSTEM DISORDERS	10	0.82 ( 0.44 - 1.53 )	0.82 ( 0.4 )
BRAIN OEDEMA	NERVOUS SYSTEM DISORDERS	10	2.34 ( 1.24 - 4.44 )	2.34 ( 7.23 )
DEAFNESS TRANSITORY	EAR AND LABYRINTH DISORDERS	10	1.63 ( 0.86 - 3.06 )	1.63 ( 2.3 )
MACULOPATHY	EYE DISORDERS	10	2.56 ( 1.35 - 4.86 )	2.56 ( 8.87 )
INTERVERTEBRAL DISC SPACE NARROWING	MUSCULOSKELETAL AND CONNECTIVE TISSUE DISORDERS	10	2.96 ( 1.55 - 5.64 )	2.96 ( 11.98 )
BLOOD IRON ABNORMAL	INVESTIGATIONS	10	0.96 ( 0.51 - 1.8 )	0.96 ( 0.01 )
NECK MASS	MUSCULOSKELETAL AND CONNECTIVE TISSUE DISORDERS	10	1.04 ( 0.55 - 1.95 )	1.04 ( 0.02 )
HYPOGAMMAGLOBULINAEMIA	IMMUNE SYSTEM DISORDERS	10	1.8 ( 0.96 - 3.41 )	1.8 ( 3.42 )
ELBOW DEFORMITY	MUSCULOSKELETAL AND CONNECTIVE TISSUE DISORDERS	10	1.68 ( 0.89 - 3.16 )	1.68 ( 2.62 )
KERATITIS	EYE DISORDERS	10	1.67 ( 0.89 - 3.15 )	1.67 ( 2.57 )
SOFT TISSUE SWELLING	MUSCULOSKELETAL AND CONNECTIVE TISSUE DISORDERS	10	5.01 ( 2.59 - 9.71 )	5.01 ( 28.21 )
STEATOHEPATITIS	HEPATOBILIARY DISORDERS	10	7.85 ( 3.96 - 15.55 )	7.85 ( 49.07 )
RADICULOPATHY	NERVOUS SYSTEM DISORDERS	10	1.73 ( 0.92 - 3.26 )	1.73 ( 2.92 )
FAECES DISCOLOURED	GASTROINTESTINAL DISORDERS	10	0.63 ( 0.34 - 1.18 )	0.63 ( 2.11 )
UNDERWEIGHT	METABOLISM AND NUTRITION DISORDERS	10	5.08 ( 2.62 - 9.86 )	5.08 ( 28.75 )
THERAPY PARTIAL RESPONDER	GENERAL DISORDERS AND ADMINISTRATION SITE CONDITIONS	10	2.33 ( 1.23 - 4.41 )	2.33 ( 7.12 )
SPINAL FRACTURE	INJURY, POISONING AND PROCEDURAL COMPLICATIONS	10	0.21 ( 0.11 - 0.39 )	0.21 ( 29.44 )
JOINT LOCK	MUSCULOSKELETAL AND CONNECTIVE TISSUE DISORDERS	10	0.48 ( 0.26 - 0.89 )	0.48 ( 5.67 )
PANCREATITIS ACUTE	GASTROINTESTINAL DISORDERS	10	0.9 ( 0.48 - 1.69 )	0.9 ( 0.1 )
PYODERMA GANGRENOSUM	SKIN AND SUBCUTANEOUS TISSUE DISORDERS	10	1.36 ( 0.72 - 2.56 )	1.36 ( 0.93 )
DIABETIC EYE DISEASE	EYE DISORDERS	10	12.03 ( 5.88 - 24.61 )	12.03 ( 75.85 )
EYE PAIN	EYE DISORDERS	10	0.24 ( 0.13 - 0.44 )	0.24 ( 24.52 )
TYPE 1 DIABETES MELLITUS	METABOLISM AND NUTRITION DISORDERS	10	2.1 ( 1.11 - 3.97 )	2.1 ( 5.43 )
HEPATITIS TOXIC	HEPATOBILIARY DISORDERS	10	6.33 ( 3.23 - 12.4 )	6.33 ( 38.2 )
PROSTATE CANCER	NEOPLASMS BENIGN, MALIGNANT AND UNSPECIFIED (INCL CYSTS AND POLYPS)	10	0.31 ( 0.17 - 0.57 )	0.31 ( 15.4 )
CEREBRAL INFARCTION	NERVOUS SYSTEM DISORDERS	10	0.5 ( 0.27 - 0.94 )	0.5 ( 4.87 )
ADJUSTMENT DISORDER WITH DEPRESSED MOOD	PSYCHIATRIC DISORDERS	10	0.58 ( 0.31 - 1.09 )	0.58 ( 2.92 )
ENTEROCOCCAL INFECTION	INFECTIONS AND INFESTATIONS	10	3.31 ( 1.73 - 6.33 )	3.31 ( 14.78 )
MATERNAL EXPOSURE TIMING UNSPECIFIED	INJURY, POISONING AND PROCEDURAL COMPLICATIONS	10	1.34 ( 0.71 - 2.51 )	1.34 ( 0.82 )
SUBARACHNOID HAEMORRHAGE	NERVOUS SYSTEM DISORDERS	10	1.31 ( 0.7 - 2.47 )	1.31 ( 0.72 )
MITRAL VALVE INCOMPETENCE	CARDIAC DISORDERS	10	0.88 ( 0.47 - 1.65 )	0.88 ( 0.16 )
TOOTH EXTRACTION	SURGICAL AND MEDICAL PROCEDURES	9	0.29 ( 0.15 - 0.56 )	0.29 ( 15.47 )
ABORTION	PREGNANCY, PUERPERIUM AND PERINATAL CONDITIONS	9	3.73 ( 1.88 - 7.42 )	3.73 ( 16.32 )
FUNCTIONAL GASTROINTESTINAL DISORDER	GASTROINTESTINAL DISORDERS	9	1.84 ( 0.94 - 3.59 )	1.84 ( 3.26 )
LIP SWELLING	GASTROINTESTINAL DISORDERS	9	0.36 ( 0.19 - 0.7 )	0.36 ( 9.85 )
ABSCESS LIMB	INFECTIONS AND INFESTATIONS	9	0.65 ( 0.34 - 1.26 )	0.65 ( 1.62 )
BREATH SOUNDS ABNORMAL	INVESTIGATIONS	9	1.35 ( 0.69 - 2.62 )	1.35 ( 0.78 )
MOTOR DYSFUNCTION	NERVOUS SYSTEM DISORDERS	9	0.85 ( 0.44 - 1.65 )	0.85 ( 0.23 )
PSYCHIATRIC SYMPTOM	PSYCHIATRIC DISORDERS	9	1.99 ( 1.02 - 3.9 )	1.99 ( 4.22 )
FACE OEDEMA	GENERAL DISORDERS AND ADMINISTRATION SITE CONDITIONS	9	1.04 ( 0.53 - 2.01 )	1.04 ( 0.01 )
HEPATIC LESION	HEPATOBILIARY DISORDERS	9	2.62 ( 1.33 - 5.15 )	2.62 ( 8.4 )
BLOOD URINE PRESENT	INVESTIGATIONS	9	0.37 ( 0.19 - 0.72 )	0.37 ( 9.32 )
CAESAREAN SECTION	SURGICAL AND MEDICAL PROCEDURES	9	1.08 ( 0.55 - 2.09 )	1.08 ( 0.05 )
GALLBLADDER DISORDER	HEPATOBILIARY DISORDERS	9	0.29 ( 0.15 - 0.56 )	0.29 ( 15.35 )
CHRONIC GASTRITIS	GASTROINTESTINAL DISORDERS	9	2.62 ( 1.33 - 5.15 )	2.62 ( 8.4 )
HEAD INJURY	INJURY, POISONING AND PROCEDURAL COMPLICATIONS	9	0.23 ( 0.12 - 0.44 )	0.23 ( 23.61 )
INTERVERTEBRAL DISC DISORDER	MUSCULOSKELETAL AND CONNECTIVE TISSUE DISORDERS	9	0.62 ( 0.32 - 1.19 )	0.62 ( 2.13 )
KERATOACANTHOMA	NEOPLASMS BENIGN, MALIGNANT AND UNSPECIFIED (INCL CYSTS AND POLYPS)	9	11.6 ( 5.47 - 24.59 )	11.6 ( 65.98 )
SPUTUM DISCOLOURED	RESPIRATORY, THORACIC AND MEDIASTINAL DISORDERS	9	0.37 ( 0.19 - 0.72 )	0.37 ( 9.3 )
DEAFNESS NEUROSENSORY	EAR AND LABYRINTH DISORDERS	9	1.34 ( 0.69 - 2.6 )	1.34 ( 0.74 )
MUCOSAL ULCERATION	GENERAL DISORDERS AND ADMINISTRATION SITE CONDITIONS	9	4.06 ( 2.04 - 8.09 )	4.06 ( 18.66 )
CYTOMEGALOVIRUS INFECTION	INFECTIONS AND INFESTATIONS	9	1.05 ( 0.54 - 2.05 )	1.05 ( 0.02 )
MYOSITIS	MUSCULOSKELETAL AND CONNECTIVE TISSUE DISORDERS	9	1.01 ( 0.52 - 1.96 )	1.01 ( 0 )
ANGER	PSYCHIATRIC DISORDERS	9	0.89 ( 0.46 - 1.71 )	0.89 ( 0.13 )
CONNECTIVE TISSUE DISORDER	MUSCULOSKELETAL AND CONNECTIVE TISSUE DISORDERS	9	3.42 ( 1.73 - 6.77 )	3.42 ( 14.07 )
BLOOD CREATINE INCREASED	INVESTIGATIONS	9	2.44 ( 1.24 - 4.8 )	2.44 ( 7.18 )
BLOODY DISCHARGE	VASCULAR DISORDERS	9	2.5 ( 1.27 - 4.91 )	2.5 ( 7.57 )
GASTRIC HAEMORRHAGE	GASTROINTESTINAL DISORDERS	9	0.85 ( 0.44 - 1.65 )	0.85 ( 0.23 )
SKIN INFECTION	INFECTIONS AND INFESTATIONS	9	0.28 ( 0.14 - 0.53 )	0.28 ( 16.95 )
THERAPEUTIC RESPONSE CHANGED	GENERAL DISORDERS AND ADMINISTRATION SITE CONDITIONS	9	6.02 ( 2.97 - 12.18 )	6.02 ( 32.26 )
TRANSAMINASES ABNORMAL	INVESTIGATIONS	9	5.91 ( 2.92 - 11.95 )	5.91 ( 31.52 )
PSEUDARTHROSIS	MUSCULOSKELETAL AND CONNECTIVE TISSUE DISORDERS	9	7.06 ( 3.46 - 14.43 )	7.06 ( 39.17 )
THYROID CANCER	NEOPLASMS BENIGN, MALIGNANT AND UNSPECIFIED (INCL CYSTS AND POLYPS)	9	0.74 ( 0.39 - 1.44 )	0.75 ( 0.77 )
OVARIAN NEOPLASM	NEOPLASMS BENIGN, MALIGNANT AND UNSPECIFIED (INCL CYSTS AND POLYPS)	9	2.27 ( 1.16 - 4.46 )	2.27 ( 6.03 )
PRERENAL FAILURE	RENAL AND URINARY DISORDERS	9	4.39 ( 2.2 - 8.77 )	4.39 ( 21 )
NECK DEFORMITY	MUSCULOSKELETAL AND CONNECTIVE TISSUE DISORDERS	9	3.73 ( 1.88 - 7.42 )	3.73 ( 16.32 )
COLON CANCER	NEOPLASMS BENIGN, MALIGNANT AND UNSPECIFIED (INCL CYSTS AND POLYPS)	9	0.3 ( 0.16 - 0.58 )	0.3 ( 14.41 )
THROMBOCYTOSIS	BLOOD AND LYMPHATIC SYSTEM DISORDERS	9	2.39 ( 1.22 - 4.69 )	2.39 ( 6.81 )
RHEUMATOID FACTOR INCREASED	INVESTIGATIONS	9	0.62 ( 0.32 - 1.2 )	0.62 ( 2.08 )
CHRONIC KIDNEY DISEASE	RENAL AND URINARY DISORDERS	9	0.4 ( 0.21 - 0.77 )	0.4 ( 8.08 )
OCULAR TOXICITY	EYE DISORDERS	9	7.22 ( 3.53 - 14.77 )	7.22 ( 40.18 )
MALNUTRITION	METABOLISM AND NUTRITION DISORDERS	9	1.29 ( 0.66 - 2.51 )	1.29 ( 0.56 )
MICROCYTIC ANAEMIA	BLOOD AND LYMPHATIC SYSTEM DISORDERS	9	3.04 ( 1.54 - 5.99 )	3.04 ( 11.33 )
NORMOCHROMIC NORMOCYTIC ANAEMIA	BLOOD AND LYMPHATIC SYSTEM DISORDERS	9	3.04 ( 1.54 - 5.99 )	3.04 ( 11.33 )
SKIN HYPERPIGMENTATION	SKIN AND SUBCUTANEOUS TISSUE DISORDERS	9	2.75 ( 1.4 - 5.42 )	2.75 ( 9.33 )
FRUSTRATION TOLERANCE DECREASED	PSYCHIATRIC DISORDERS	9	0.8 ( 0.41 - 1.54 )	0.8 ( 0.46 )
RESPIRATORY TRACT CONGESTION	RESPIRATORY, THORACIC AND MEDIASTINAL DISORDERS	9	0.12 ( 0.06 - 0.23 )	0.12 ( 56.79 )
ADRENAL INSUFFICIENCY	ENDOCRINE DISORDERS	9	0.67 ( 0.35 - 1.3 )	0.67 ( 1.41 )
TUBULOINTERSTITIAL NEPHRITIS	RENAL AND URINARY DISORDERS	9	2.24 ( 1.14 - 4.39 )	2.24 ( 5.82 )
CATARACT OPERATION	SURGICAL AND MEDICAL PROCEDURES	9	0.61 ( 0.32 - 1.18 )	0.61 ( 2.18 )
ALTERED STATE OF CONSCIOUSNESS	NERVOUS SYSTEM DISORDERS	9	1.35 ( 0.69 - 2.62 )	1.35 ( 0.78 )
ERYTHEMA MULTIFORME	SKIN AND SUBCUTANEOUS TISSUE DISORDERS	9	1.98 ( 1.01 - 3.87 )	1.98 ( 4.14 )
PROTHROMBIN TIME PROLONGED	INVESTIGATIONS	9	4.16 ( 2.09 - 8.3 )	4.16 ( 19.4 )
PANCREATIC CARCINOMA	NEOPLASMS BENIGN, MALIGNANT AND UNSPECIFIED (INCL CYSTS AND POLYPS)	9	0.64 ( 0.33 - 1.24 )	0.64 ( 1.78 )
ANKLE FRACTURE	INJURY, POISONING AND PROCEDURAL COMPLICATIONS	8	0.2 ( 0.1 - 0.41 )	0.2 ( 24.76 )
CHRONIC LYMPHOCYTIC LEUKAEMIA	NEOPLASMS BENIGN, MALIGNANT AND UNSPECIFIED (INCL CYSTS AND POLYPS)	8	1.6 ( 0.79 - 3.26 )	1.6 ( 1.74 )
OSTEITIS	MUSCULOSKELETAL AND CONNECTIVE TISSUE DISORDERS	8	1.07 ( 0.53 - 2.16 )	1.07 ( 0.03 )
MACULE	SKIN AND SUBCUTANEOUS TISSUE DISORDERS	8	1.55 ( 0.76 - 3.15 )	1.55 ( 1.51 )
SOFT TISSUE DISORDER	MUSCULOSKELETAL AND CONNECTIVE TISSUE DISORDERS	8	1.61 ( 0.79 - 3.28 )	1.61 ( 1.78 )
CARDIOMEGALY	CARDIAC DISORDERS	8	0.53 ( 0.26 - 1.07 )	0.53 ( 3.25 )
OCULAR ICTERUS	HEPATOBILIARY DISORDERS	8	4.13 ( 1.98 - 8.57 )	4.12 ( 17 )
SCOLIOSIS	MUSCULOSKELETAL AND CONNECTIVE TISSUE DISORDERS	8	0.57 ( 0.28 - 1.14 )	0.57 ( 2.56 )
FEELING JITTERY	GENERAL DISORDERS AND ADMINISTRATION SITE CONDITIONS	8	0.7 ( 0.35 - 1.41 )	0.7 ( 1 )
EYE HAEMORRHAGE	EYE DISORDERS	8	0.53 ( 0.26 - 1.06 )	0.53 ( 3.35 )
SUICIDE ATTEMPT	PSYCHIATRIC DISORDERS	8	1.15 ( 0.57 - 2.34 )	1.15 ( 0.16 )
ACCIDENTAL OVERDOSE	INJURY, POISONING AND PROCEDURAL COMPLICATIONS	8	0.72 ( 0.36 - 1.45 )	0.72 ( 0.87 )
HYPERTHYROIDISM	ENDOCRINE DISORDERS	8	1.05 ( 0.52 - 2.13 )	1.05 ( 0.02 )
ENDOCARDITIS	INFECTIONS AND INFESTATIONS	8	0.96 ( 0.48 - 1.94 )	0.96 ( 0.01 )
STENT PLACEMENT	SURGICAL AND MEDICAL PROCEDURES	8	0.82 ( 0.41 - 1.65 )	0.82 ( 0.32 )
GROIN PAIN	MUSCULOSKELETAL AND CONNECTIVE TISSUE DISORDERS	8	0.39 ( 0.2 - 0.79 )	0.39 ( 7.38 )
LYME DISEASE	INFECTIONS AND INFESTATIONS	8	0.83 ( 0.41 - 1.68 )	0.83 ( 0.27 )
URINARY TRACT DISORDER	RENAL AND URINARY DISORDERS	8	1.41 ( 0.69 - 2.85 )	1.41 ( 0.91 )
RHEUMATIC DISORDER	MUSCULOSKELETAL AND CONNECTIVE TISSUE DISORDERS	8	0.83 ( 0.41 - 1.67 )	0.83 ( 0.27 )
SHOULDER OPERATION	SURGICAL AND MEDICAL PROCEDURES	8	0.42 ( 0.21 - 0.84 )	0.42 ( 6.3 )
DECREASED IMMUNE RESPONSIVENESS	IMMUNE SYSTEM DISORDERS	8	0.26 ( 0.13 - 0.51 )	0.26 ( 17.21 )
JOINT SPACE NARROWING	MUSCULOSKELETAL AND CONNECTIVE TISSUE DISORDERS	8	4.31 ( 2.07 - 8.97 )	4.31 ( 18.16 )
INTRAOCULAR PRESSURE INCREASED	INVESTIGATIONS	8	0.91 ( 0.45 - 1.83 )	0.91 ( 0.07 )
OVARIAN CYST	REPRODUCTIVE SYSTEM AND BREAST DISORDERS	8	0.37 ( 0.18 - 0.74 )	0.37 ( 8.63 )
TRANSPLANT REJECTION	IMMUNE SYSTEM DISORDERS	8	1.92 ( 0.95 - 3.92 )	1.92 ( 3.38 )
PERITONITIS	INFECTIONS AND INFESTATIONS	8	0.49 ( 0.24 - 0.99 )	0.49 ( 4.14 )
ACCIDENT	INJURY, POISONING AND PROCEDURAL COMPLICATIONS	8	0.29 ( 0.15 - 0.59 )	0.29 ( 13.4 )
GINGIVAL BLEEDING	GASTROINTESTINAL DISORDERS	8	0.61 ( 0.3 - 1.22 )	0.61 ( 1.99 )
GLYCOSYLATED HAEMOGLOBIN INCREASED	INVESTIGATIONS	8	0.99 ( 0.49 - 2 )	0.99 ( 0 )
ABNORMAL FAECES	GASTROINTESTINAL DISORDERS	8	2.03 ( 1 - 4.15 )	2.03 ( 3.98 )
HEPATITIS C	INFECTIONS AND INFESTATIONS	8	0.8 ( 0.4 - 1.62 )	0.8 ( 0.38 )
METASTASES TO LYMPH NODES	NEOPLASMS BENIGN, MALIGNANT AND UNSPECIFIED (INCL CYSTS AND POLYPS)	8	1.54 ( 0.76 - 3.13 )	1.54 ( 1.47 )
EMOTIONAL DISTRESS	PSYCHIATRIC DISORDERS	8	0.58 ( 0.29 - 1.16 )	0.58 ( 2.45 )
CHONDROPATHY	MUSCULOSKELETAL AND CONNECTIVE TISSUE DISORDERS	8	0.36 ( 0.18 - 0.72 )	0.36 ( 9.18 )
MIDDLE INSOMNIA	PSYCHIATRIC DISORDERS	8	0.76 ( 0.38 - 1.53 )	0.76 ( 0.61 )
ULCER HAEMORRHAGE	GENERAL DISORDERS AND ADMINISTRATION SITE CONDITIONS	8	0.55 ( 0.27 - 1.11 )	0.55 ( 2.86 )
OBSTRUCTIVE AIRWAYS DISORDER	RESPIRATORY, THORACIC AND MEDIASTINAL DISORDERS	8	1.47 ( 0.73 - 2.99 )	1.47 ( 1.17 )
AMYOTROPHIC LATERAL SCLEROSIS	NERVOUS SYSTEM DISORDERS	8	1.91 ( 0.94 - 3.89 )	1.91 ( 3.31 )
OSTEOSCLEROSIS	MUSCULOSKELETAL AND CONNECTIVE TISSUE DISORDERS	8	1.94 ( 0.95 - 3.95 )	1.94 ( 3.45 )
BLOOD IRON DECREASED	INVESTIGATIONS	8	0.34 ( 0.17 - 0.69 )	0.34 ( 9.91 )
FEBRILE NEUTROPENIA	BLOOD AND LYMPHATIC SYSTEM DISORDERS	8	0.8 ( 0.4 - 1.61 )	0.8 ( 0.4 )
DIABETES MELLITUS INADEQUATE CONTROL	METABOLISM AND NUTRITION DISORDERS	8	0.76 ( 0.38 - 1.52 )	0.76 ( 0.62 )
LARGE INTESTINE PERFORATION	GASTROINTESTINAL DISORDERS	8	0.73 ( 0.36 - 1.46 )	0.73 ( 0.81 )
PERIPHERAL SENSORY NEUROPATHY	NERVOUS SYSTEM DISORDERS	8	3.01 ( 1.46 - 6.19 )	3.01 ( 9.9 )
MENTAL STATUS CHANGES	PSYCHIATRIC DISORDERS	8	0.9 ( 0.44 - 1.81 )	0.9 ( 0.09 )
EYE IRRITATION	EYE DISORDERS	8	0.34 ( 0.17 - 0.68 )	0.34 ( 10.3 )
CHOKING	RESPIRATORY, THORACIC AND MEDIASTINAL DISORDERS	8	0.66 ( 0.33 - 1.33 )	0.66 ( 1.35 )
THROAT IRRITATION	RESPIRATORY, THORACIC AND MEDIASTINAL DISORDERS	8	0.12 ( 0.06 - 0.23 )	0.12 ( 54.2 )
UPPER GASTROINTESTINAL HAEMORRHAGE	GASTROINTESTINAL DISORDERS	8	1.05 ( 0.52 - 2.13 )	1.05 ( 0.02 )
SKIN PLAQUE	SKIN AND SUBCUTANEOUS TISSUE DISORDERS	8	1.09 ( 0.54 - 2.2 )	1.09 ( 0.06 )
GASTROENTERITIS VIRAL	INFECTIONS AND INFESTATIONS	8	0.16 ( 0.08 - 0.33 )	0.16 ( 34.08 )
ORAL MUCOSA EROSION	GASTROINTESTINAL DISORDERS	8	4.66 ( 2.23 - 9.73 )	4.66 ( 20.35 )
IMMUNE-MEDIATED MYOSITIS	MUSCULOSKELETAL AND CONNECTIVE TISSUE DISORDERS	8	20.63 ( 8.65 - 49.17 )	20.62 ( 95.06 )
HYPONATRAEMIA	METABOLISM AND NUTRITION DISORDERS	8	0.43 ( 0.22 - 0.87 )	0.43 ( 5.9 )
PARAESTHESIA ORAL	GASTROINTESTINAL DISORDERS	7	0.62 ( 0.29 - 1.3 )	0.62 ( 1.65 )
INTESTINAL OBSTRUCTION	GASTROINTESTINAL DISORDERS	7	0.23 ( 0.11 - 0.48 )	0.23 ( 18.29 )
WRIST FRACTURE	INJURY, POISONING AND PROCEDURAL COMPLICATIONS	7	0.22 ( 0.1 - 0.46 )	0.22 ( 19.21 )
WRONG TECHNIQUE IN PRODUCT USAGE PROCESS	INJURY, POISONING AND PROCEDURAL COMPLICATIONS	7	0.03 ( 0.01 - 0.06 )	0.03 ( 245.81 )
VERTIGO POSITIONAL	EAR AND LABYRINTH DISORDERS	7	2.72 ( 1.26 - 5.86 )	2.72 ( 7.06 )
MOOD ALTERED	PSYCHIATRIC DISORDERS	7	0.58 ( 0.27 - 1.22 )	0.58 ( 2.14 )
ERYSIPELAS	INFECTIONS AND INFESTATIONS	7	0.43 ( 0.21 - 0.91 )	0.43 ( 5.1 )
BLOOD PRESSURE DIASTOLIC ABNORMAL	INVESTIGATIONS	7	0.18 ( 0.09 - 0.38 )	0.18 ( 25.61 )
HERPES VIRUS INFECTION	INFECTIONS AND INFESTATIONS	7	0.37 ( 0.18 - 0.79 )	0.37 ( 7.25 )
THIRST	GENERAL DISORDERS AND ADMINISTRATION SITE CONDITIONS	7	0.7 ( 0.33 - 1.49 )	0.7 ( 0.86 )
PURULENT DISCHARGE	INFECTIONS AND INFESTATIONS	7	0.73 ( 0.35 - 1.55 )	0.73 ( 0.66 )
DENTAL CARIES	GASTROINTESTINAL DISORDERS	7	0.29 ( 0.14 - 0.6 )	0.29 ( 12.35 )
STRESS FRACTURE	INJURY, POISONING AND PROCEDURAL COMPLICATIONS	7	0.52 ( 0.25 - 1.1 )	0.52 ( 3.04 )
EPIGASTRIC DISCOMFORT	GASTROINTESTINAL DISORDERS	7	0.84 ( 0.4 - 1.78 )	0.84 ( 0.21 )
SLUGGISHNESS	GENERAL DISORDERS AND ADMINISTRATION SITE CONDITIONS	7	0.79 ( 0.38 - 1.68 )	0.79 ( 0.36 )
LIGAMENT SPRAIN	INJURY, POISONING AND PROCEDURAL COMPLICATIONS	7	0.22 ( 0.11 - 0.47 )	0.22 ( 18.58 )
MACULAR DEGENERATION	EYE DISORDERS	7	0.36 ( 0.17 - 0.75 )	0.36 ( 7.99 )
TRIGGER FINGER	MUSCULOSKELETAL AND CONNECTIVE TISSUE DISORDERS	7	0.35 ( 0.17 - 0.74 )	0.35 ( 8.21 )
ORGANISING PNEUMONIA	RESPIRATORY, THORACIC AND MEDIASTINAL DISORDERS	7	0.65 ( 0.31 - 1.37 )	0.65 ( 1.29 )
HYPERSOMNIA	NERVOUS SYSTEM DISORDERS	7	0.34 ( 0.16 - 0.72 )	0.34 ( 8.84 )
INTESTINAL SEPSIS	INFECTIONS AND INFESTATIONS	7	3.83 ( 1.76 - 8.34 )	3.83 ( 13.22 )
DIALYSIS	SURGICAL AND MEDICAL PROCEDURES	7	1.12 ( 0.53 - 2.37 )	1.12 ( 0.08 )
SINUSITIS BACTERIAL	INFECTIONS AND INFESTATIONS	7	2.48 ( 1.15 - 5.33 )	2.48 ( 5.77 )
DEPENDENCE	PSYCHIATRIC DISORDERS	7	4.43 ( 2.02 - 9.72 )	4.43 ( 16.57 )
BRADYCARDIA	CARDIAC DISORDERS	7	0.53 ( 0.25 - 1.11 )	0.53 ( 2.9 )
CHEILITIS	GASTROINTESTINAL DISORDERS	7	1.23 ( 0.58 - 2.62 )	1.23 ( 0.3 )
MUSCLE STRAIN	INJURY, POISONING AND PROCEDURAL COMPLICATIONS	7	0.37 ( 0.18 - 0.79 )	0.37 ( 7.3 )
CYTOLOGY ABNORMAL	INVESTIGATIONS	7	5.74 ( 2.59 - 12.75 )	5.74 ( 23.65 )
URINARY RETENTION	RENAL AND URINARY DISORDERS	7	0.42 ( 0.2 - 0.89 )	0.42 ( 5.44 )
RENAL CELL CARCINOMA	NEOPLASMS BENIGN, MALIGNANT AND UNSPECIFIED (INCL CYSTS AND POLYPS)	7	1.39 ( 0.65 - 2.95 )	1.39 ( 0.73 )
SPLENOMEGALY	BLOOD AND LYMPHATIC SYSTEM DISORDERS	7	0.76 ( 0.36 - 1.6 )	0.76 ( 0.54 )
FEAR	PSYCHIATRIC DISORDERS	7	0.46 ( 0.22 - 0.97 )	0.46 ( 4.38 )
SPINAL OPERATION	SURGICAL AND MEDICAL PROCEDURES	7	0.13 ( 0.06 - 0.28 )	0.13 ( 39.15 )
QUALITY OF LIFE DECREASED	INVESTIGATIONS	7	0.85 ( 0.4 - 1.8 )	0.85 ( 0.18 )
MULTIPLE ORGAN DYSFUNCTION SYNDROME	GENERAL DISORDERS AND ADMINISTRATION SITE CONDITIONS	7	0.45 ( 0.21 - 0.95 )	0.45 ( 4.66 )
ACNE CYSTIC	SKIN AND SUBCUTANEOUS TISSUE DISORDERS	7	2.3 ( 1.07 - 4.93 )	2.3 ( 4.82 )
MYCOBACTERIUM AVIUM COMPLEX INFECTION	INFECTIONS AND INFESTATIONS	7	1 ( 0.47 - 2.12 )	1 ( 0 )
MEAN CELL VOLUME DECREASED	INVESTIGATIONS	7	2.84 ( 1.32 - 6.13 )	2.84 ( 7.73 )
SPINAL COLUMN INJURY	INJURY, POISONING AND PROCEDURAL COMPLICATIONS	7	0.84 ( 0.4 - 1.78 )	0.84 ( 0.2 )
DEFAECATION URGENCY	GASTROINTESTINAL DISORDERS	7	2.72 ( 1.26 - 5.86 )	2.72 ( 7.06 )
DYSLIPIDAEMIA	METABOLISM AND NUTRITION DISORDERS	7	1.26 ( 0.59 - 2.68 )	1.26 ( 0.37 )
PERIPHERAL COLDNESS	VASCULAR DISORDERS	7	0.44 ( 0.21 - 0.92 )	0.44 ( 4.97 )
HEPATITIS E	INFECTIONS AND INFESTATIONS	7	2.6 ( 1.21 - 5.61 )	2.6 ( 6.45 )
INFREQUENT BOWEL MOVEMENTS	GASTROINTESTINAL DISORDERS	7	4.28 ( 1.96 - 9.37 )	4.28 ( 15.74 )
BILIRUBIN CONJUGATED INCREASED	INVESTIGATIONS	7	21.05 ( 8.29 - 53.48 )	21.05 ( 84.45 )
MASS EXCISION	SURGICAL AND MEDICAL PROCEDURES	7	3.72 ( 1.71 - 8.09 )	3.72 ( 12.6 )
GOUT	METABOLISM AND NUTRITION DISORDERS	7	0.3 ( 0.14 - 0.63 )	0.3 ( 11.26 )
MUCOSAL DRYNESS	GENERAL DISORDERS AND ADMINISTRATION SITE CONDITIONS	7	3.77 ( 1.73 - 8.21 )	3.77 ( 12.9 )
NECROTISING FASCIITIS	INFECTIONS AND INFESTATIONS	7	1.07 ( 0.5 - 2.27 )	1.07 ( 0.03 )
STRONGYLOIDIASIS	INFECTIONS AND INFESTATIONS	7	3.56 ( 1.64 - 7.74 )	3.56 ( 11.72 )
NEPHROTIC SYNDROME	RENAL AND URINARY DISORDERS	7	1.1 ( 0.52 - 2.34 )	1.1 ( 0.07 )
BLOOD PRESSURE DIASTOLIC INCREASED	INVESTIGATIONS	7	0.35 ( 0.17 - 0.74 )	0.35 ( 8.3 )
TEMPERATURE INTOLERANCE	GENERAL DISORDERS AND ADMINISTRATION SITE CONDITIONS	7	0.99 ( 0.47 - 2.11 )	0.99 ( 0 )
LIVEDO RETICULARIS	SKIN AND SUBCUTANEOUS TISSUE DISORDERS	7	4.21 ( 1.92 - 9.21 )	4.21 ( 15.35 )
SPINAL CORD INFECTION	INFECTIONS AND INFESTATIONS	7	3.24 ( 1.49 - 7.02 )	3.24 ( 9.94 )
HYPERADRENOCORTICISM	ENDOCRINE DISORDERS	7	28.07 ( 10.45 - 75.38 )	28.07 ( 102.8 )
FEELING COLD	GENERAL DISORDERS AND ADMINISTRATION SITE CONDITIONS	7	0.21 ( 0.1 - 0.45 )	0.21 ( 20.42 )
LUPUS VULGARIS	INFECTIONS AND INFESTATIONS	7	0.65 ( 0.31 - 1.38 )	0.65 ( 1.27 )
SEXUAL DYSFUNCTION	REPRODUCTIVE SYSTEM AND BREAST DISORDERS	7	7.43 ( 3.29 - 16.76 )	7.43 ( 32.31 )
TENDER JOINT COUNT INCREASED	INVESTIGATIONS	7	9.02 ( 3.94 - 20.66 )	9.02 ( 39.95 )
COVID-19 PNEUMONIA	INFECTIONS AND INFESTATIONS	7	0.31 ( 0.15 - 0.66 )	0.31 ( 10.36 )
FURUNCLE	INFECTIONS AND INFESTATIONS	7	0.25 ( 0.12 - 0.52 )	0.25 ( 16.02 )
HEPATORENAL SYNDROME	HEPATOBILIARY DISORDERS	7	4.68 ( 2.13 - 10.28 )	4.68 ( 17.92 )
RHEUMATOID VASCULITIS	VASCULAR DISORDERS	7	1.84 ( 0.86 - 3.94 )	1.84 ( 2.57 )
HYPERKALAEMIA	METABOLISM AND NUTRITION DISORDERS	7	1.14 ( 0.54 - 2.42 )	1.14 ( 0.11 )
JAUNDICE CHOLESTATIC	HEPATOBILIARY DISORDERS	7	4.77 ( 2.17 - 10.49 )	4.77 ( 18.41 )
HEMIPLEGIA	NERVOUS SYSTEM DISORDERS	7	0.87 ( 0.41 - 1.84 )	0.87 ( 0.13 )
HYPERBILIRUBINAEMIA	HEPATOBILIARY DISORDERS	7	5.16 ( 2.34 - 11.38 )	5.16 ( 20.52 )
PNEUMONIA STAPHYLOCOCCAL	INFECTIONS AND INFESTATIONS	7	1.8 ( 0.84 - 3.86 )	1.8 ( 2.39 )
PULMONARY GRANULOMA	RESPIRATORY, THORACIC AND MEDIASTINAL DISORDERS	7	1.84 ( 0.86 - 3.94 )	1.84 ( 2.57 )
GLUCOSE URINE PRESENT	INVESTIGATIONS	7	12.03 ( 5.11 - 28.3 )	12.03 ( 53.1 )
OESOPHAGEAL CANDIDIASIS	INFECTIONS AND INFESTATIONS	7	1.49 ( 0.7 - 3.18 )	1.49 ( 1.1 )
CIRCULATORY COLLAPSE	VASCULAR DISORDERS	7	1.02 ( 0.48 - 2.17 )	1.02 ( 0 )
DRUG EXPOSURE BEFORE PREGNANCY	INJURY, POISONING AND PROCEDURAL COMPLICATIONS	7	14.86 ( 6.16 - 35.84 )	14.86 ( 64.1 )
POLYURIA	RENAL AND URINARY DISORDERS	6	2.12 ( 0.93 - 4.84 )	2.12 ( 3.37 )
UNDERDOSE	INJURY, POISONING AND PROCEDURAL COMPLICATIONS	6	0.08 ( 0.04 - 0.18 )	0.08 ( 64.55 )
DECREASED ACTIVITY	GENERAL DISORDERS AND ADMINISTRATION SITE CONDITIONS	6	0.83 ( 0.37 - 1.86 )	0.83 ( 0.21 )
HISTOPLASMOSIS	INFECTIONS AND INFESTATIONS	6	0.77 ( 0.34 - 1.73 )	0.77 ( 0.4 )
ORAL MUCOSAL BLISTERING	GASTROINTESTINAL DISORDERS	6	0.57 ( 0.25 - 1.28 )	0.57 ( 1.92 )
TOXIC SKIN ERUPTION	SKIN AND SUBCUTANEOUS TISSUE DISORDERS	6	1.53 ( 0.67 - 3.45 )	1.52 ( 1.04 )
KNEE OPERATION	SURGICAL AND MEDICAL PROCEDURES	6	0.12 ( 0.06 - 0.28 )	0.12 ( 36.79 )
COORDINATION ABNORMAL	NERVOUS SYSTEM DISORDERS	6	0.9 ( 0.4 - 2.02 )	0.9 ( 0.07 )
CARTILAGE INJURY	INJURY, POISONING AND PROCEDURAL COMPLICATIONS	6	0.42 ( 0.19 - 0.94 )	0.42 ( 4.69 )
MENTAL IMPAIRMENT	NERVOUS SYSTEM DISORDERS	6	0.56 ( 0.25 - 1.26 )	0.56 ( 2.03 )
PERONEAL NERVE PALSY	NERVOUS SYSTEM DISORDERS	6	1.15 ( 0.51 - 2.58 )	1.15 ( 0.11 )
HYSTERECTOMY	SURGICAL AND MEDICAL PROCEDURES	6	0.31 ( 0.14 - 0.7 )	0.31 ( 8.93 )
LYMPHOCYTIC INFILTRATION	BLOOD AND LYMPHATIC SYSTEM DISORDERS	6	7.73 ( 3.2 - 18.68 )	7.73 ( 28.97 )
PAPULE	SKIN AND SUBCUTANEOUS TISSUE DISORDERS	6	0.56 ( 0.25 - 1.25 )	0.56 ( 2.07 )
RASH PUSTULAR	INFECTIONS AND INFESTATIONS	6	0.44 ( 0.2 - 0.99 )	0.44 ( 4.16 )
MENIERE'S DISEASE	EAR AND LABYRINTH DISORDERS	6	2.06 ( 0.91 - 4.7 )	2.06 ( 3.11 )
ESCHERICHIA BACTERAEMIA	INFECTIONS AND INFESTATIONS	6	2.78 ( 1.21 - 6.37 )	2.78 ( 6.33 )
SENSORY DISTURBANCE	NERVOUS SYSTEM DISORDERS	6	0.44 ( 0.2 - 0.99 )	0.44 ( 4.2 )
OTITIS MEDIA	INFECTIONS AND INFESTATIONS	6	1.22 ( 0.54 - 2.76 )	1.22 ( 0.24 )
DYSKINESIA	NERVOUS SYSTEM DISORDERS	6	0.54 ( 0.24 - 1.21 )	0.54 ( 2.3 )
HAEMORRHOIDS	GASTROINTESTINAL DISORDERS	6	0.25 ( 0.11 - 0.55 )	0.25 ( 13.54 )
SINUS CONGESTION	RESPIRATORY, THORACIC AND MEDIASTINAL DISORDERS	6	0.1 ( 0.05 - 0.23 )	0.1 ( 47.82 )
DIVERTICULUM	GASTROINTESTINAL DISORDERS	6	0.35 ( 0.16 - 0.79 )	0.35 ( 7.06 )
NERVE COMPRESSION	NERVOUS SYSTEM DISORDERS	6	0.15 ( 0.07 - 0.34 )	0.15 ( 28.37 )
VITAMIN B12 DEFICIENCY	METABOLISM AND NUTRITION DISORDERS	6	1.36 ( 0.6 - 3.08 )	1.36 ( 0.56 )
INFILTRATION ANAESTHESIA	SURGICAL AND MEDICAL PROCEDURES	6	15.47 ( 5.94 - 40.25 )	15.47 ( 56.84 )
STAPHYLOCOCCAL SEPSIS	INFECTIONS AND INFESTATIONS	6	0.6 ( 0.27 - 1.34 )	0.6 ( 1.59 )
BONE CYST	MUSCULOSKELETAL AND CONNECTIVE TISSUE DISORDERS	6	0.81 ( 0.36 - 1.82 )	0.81 ( 0.26 )
DRUG SPECIFIC ANTIBODY PRESENT	INVESTIGATIONS	6	0.87 ( 0.39 - 1.95 )	0.87 ( 0.11 )
TRANSPLANT DYSFUNCTION	INJURY, POISONING AND PROCEDURAL COMPLICATIONS	6	1.62 ( 0.71 - 3.66 )	1.62 ( 1.35 )
LYMPHOCYTE COUNT INCREASED	INVESTIGATIONS	6	1.53 ( 0.67 - 3.45 )	1.52 ( 1.04 )
MENISCUS INJURY	INJURY, POISONING AND PROCEDURAL COMPLICATIONS	6	0.17 ( 0.07 - 0.37 )	0.17 ( 25.18 )
LOOSE BODY IN JOINT	MUSCULOSKELETAL AND CONNECTIVE TISSUE DISORDERS	6	2.55 ( 1.11 - 5.83 )	2.55 ( 5.27 )
LICHEN PLANUS	SKIN AND SUBCUTANEOUS TISSUE DISORDERS	6	1.51 ( 0.67 - 3.43 )	1.51 ( 1.01 )
URINARY INCONTINENCE	RENAL AND URINARY DISORDERS	6	0.26 ( 0.12 - 0.59 )	0.26 ( 12.17 )
URINARY TRACT OBSTRUCTION	RENAL AND URINARY DISORDERS	6	2.04 ( 0.9 - 4.65 )	2.04 ( 3.02 )
THERAPY CESSATION	SURGICAL AND MEDICAL PROCEDURES	6	0.07 ( 0.03 - 0.15 )	0.07 ( 79.32 )
VITAMIN D DECREASED	INVESTIGATIONS	6	0.34 ( 0.15 - 0.76 )	0.34 ( 7.67 )
HUNGER	GENERAL DISORDERS AND ADMINISTRATION SITE CONDITIONS	6	0.81 ( 0.36 - 1.82 )	0.81 ( 0.26 )
ALLERGY TO METALS	IMMUNE SYSTEM DISORDERS	6	3.55 ( 1.53 - 8.21 )	3.55 ( 10.01 )
PERIPHERAL VASCULAR DISORDER	VASCULAR DISORDERS	6	0.69 ( 0.31 - 1.54 )	0.69 ( 0.84 )
METASTASES TO LIVER	NEOPLASMS BENIGN, MALIGNANT AND UNSPECIFIED (INCL CYSTS AND POLYPS)	6	0.47 ( 0.21 - 1.04 )	0.47 ( 3.61 )
HEPATIC CYST	HEPATOBILIARY DISORDERS	6	0.79 ( 0.35 - 1.78 )	0.79 ( 0.32 )
ABSCESS JAW	INFECTIONS AND INFESTATIONS	6	2.61 ( 1.14 - 5.98 )	2.61 ( 5.55 )
PAROTITIS	INFECTIONS AND INFESTATIONS	6	3.61 ( 1.56 - 8.35 )	3.61 ( 10.29 )
ARTERIOSCLEROSIS	VASCULAR DISORDERS	6	0.67 ( 0.3 - 1.5 )	0.67 ( 0.95 )
CHOLECYSTECTOMY	SURGICAL AND MEDICAL PROCEDURES	6	0.28 ( 0.13 - 0.63 )	0.28 ( 10.81 )
BLOOD CALCIUM DECREASED	INVESTIGATIONS	6	1 ( 0.45 - 2.26 )	1 ( 0 )
PEPTIC ULCER	GASTROINTESTINAL DISORDERS	6	1.44 ( 0.64 - 3.26 )	1.44 ( 0.79 )
NIGHTMARE	PSYCHIATRIC DISORDERS	6	0.77 ( 0.34 - 1.72 )	0.77 ( 0.41 )
HYPOAESTHESIA ORAL	GASTROINTESTINAL DISORDERS	6	0.51 ( 0.23 - 1.14 )	0.51 ( 2.83 )
APPENDIX DISORDER	GASTROINTESTINAL DISORDERS	6	1.51 ( 0.67 - 3.43 )	1.51 ( 1.01 )
PAIN OF SKIN	SKIN AND SUBCUTANEOUS TISSUE DISORDERS	6	0.35 ( 0.16 - 0.79 )	0.35 ( 6.99 )
EOSINOPHIL COUNT INCREASED	INVESTIGATIONS	6	1.51 ( 0.67 - 3.43 )	1.51 ( 1.01 )
VULVOVAGINAL MYCOTIC INFECTION	INFECTIONS AND INFESTATIONS	6	0.48 ( 0.21 - 1.07 )	0.48 ( 3.35 )
BLOOD CHOLESTEROL ABNORMAL	INVESTIGATIONS	6	0.56 ( 0.25 - 1.25 )	0.56 ( 2.09 )
ANTIBODY TEST POSITIVE	INVESTIGATIONS	6	1.88 ( 0.83 - 4.28 )	1.88 ( 2.36 )
LYMPHOCYTOSIS	BLOOD AND LYMPHATIC SYSTEM DISORDERS	6	2.55 ( 1.11 - 5.83 )	2.55 ( 5.27 )
PANCREATIC DISORDER	GASTROINTESTINAL DISORDERS	6	0.92 ( 0.41 - 2.06 )	0.92 ( 0.04 )
VEIN DISORDER	VASCULAR DISORDERS	6	0.58 ( 0.26 - 1.3 )	0.58 ( 1.79 )
HYPOVOLAEMIA	METABOLISM AND NUTRITION DISORDERS	6	2.17 ( 0.95 - 4.94 )	2.17 ( 3.55 )
HEPATIC NEOPLASM	NEOPLASMS BENIGN, MALIGNANT AND UNSPECIFIED (INCL CYSTS AND POLYPS)	6	1.36 ( 0.6 - 3.08 )	1.36 ( 0.56 )
INTRA-ABDOMINAL FLUID COLLECTION	GASTROINTESTINAL DISORDERS	6	3.23 ( 1.4 - 7.45 )	3.23 ( 8.49 )
HEMIANOPIA HOMONYMOUS	NERVOUS SYSTEM DISORDERS	6	7.47 ( 3.1 - 17.99 )	7.47 ( 27.85 )
CONTRAINDICATED PRODUCT PRESCRIBED	INJURY, POISONING AND PROCEDURAL COMPLICATIONS	6	8.66 ( 3.55 - 21.12 )	8.66 ( 32.79 )
INTENTIONAL DOSE OMISSION	INJURY, POISONING AND PROCEDURAL COMPLICATIONS	6	0.09 ( 0.04 - 0.21 )	0.09 ( 53.54 )
SKIN ABRASION	INJURY, POISONING AND PROCEDURAL COMPLICATIONS	6	0.6 ( 0.27 - 1.34 )	0.6 ( 1.58 )
HYPERPHAGIA	METABOLISM AND NUTRITION DISORDERS	6	3.8 ( 1.64 - 8.81 )	3.8 ( 11.2 )
PATHOGEN RESISTANCE	INFECTIONS AND INFESTATIONS	6	2.71 ( 1.18 - 6.21 )	2.71 ( 6.01 )
ROOT CANAL INFECTION	INFECTIONS AND INFESTATIONS	6	3.28 ( 1.42 - 7.57 )	3.28 ( 8.72 )
SALT CRAVING	METABOLISM AND NUTRITION DISORDERS	6	30.94 ( 10.4 - 92.06 )	30.94 ( 93.59 )
GASTRIC POLYPS	GASTROINTESTINAL DISORDERS	6	1.87 ( 0.82 - 4.24 )	1.87 ( 2.3 )
CELLULITIS GANGRENOUS	INFECTIONS AND INFESTATIONS	6	8.02 ( 3.31 - 19.43 )	8.02 ( 30.17 )
ECTHYMA	INFECTIONS AND INFESTATIONS	6	30.94 ( 10.4 - 92.06 )	30.94 ( 93.59 )
PULMONARY ALVEOLAR HAEMORRHAGE	RESPIRATORY, THORACIC AND MEDIASTINAL DISORDERS	6	2.01 ( 0.88 - 4.56 )	2.01 ( 2.86 )
LUNG CONSOLIDATION	RESPIRATORY, THORACIC AND MEDIASTINAL DISORDERS	6	2.02 ( 0.89 - 4.61 )	2.02 ( 2.94 )
CYANOSIS	VASCULAR DISORDERS	6	0.84 ( 0.37 - 1.89 )	0.84 ( 0.18 )
AORTIC VALVE STENOSIS	CARDIAC DISORDERS	6	1.05 ( 0.46 - 2.36 )	1.05 ( 0.01 )
ENCEPHALITIS VIRAL	INFECTIONS AND INFESTATIONS	6	2.74 ( 1.2 - 6.29 )	2.74 ( 6.17 )
EPILEPSY	NERVOUS SYSTEM DISORDERS	6	0.28 ( 0.12 - 0.61 )	0.28 ( 11.37 )
TRICUSPID VALVE INCOMPETENCE	CARDIAC DISORDERS	6	1.04 ( 0.46 - 2.33 )	1.04 ( 0.01 )
FIBROSIS	GENERAL DISORDERS AND ADMINISTRATION SITE CONDITIONS	6	1.2 ( 0.53 - 2.7 )	1.2 ( 0.19 )
APLASTIC ANAEMIA	BLOOD AND LYMPHATIC SYSTEM DISORDERS	6	1.49 ( 0.66 - 3.38 )	1.49 ( 0.94 )
THYROID FUNCTION TEST ABNORMAL	INVESTIGATIONS	5	0.96 ( 0.39 - 2.33 )	0.96 ( 0.01 )
OCULAR HYPERTENSION	EYE DISORDERS	5	4.2 ( 1.66 - 10.6 )	4.2 ( 10.91 )
DERMATOSIS	SKIN AND SUBCUTANEOUS TISSUE DISORDERS	5	10.03 ( 3.72 - 27.01 )	10.03 ( 31.79 )
INTESTINAL POLYP	GASTROINTESTINAL DISORDERS	5	0.78 ( 0.32 - 1.89 )	0.78 ( 0.3 )
CEREBELLAR ATAXIA	NERVOUS SYSTEM DISORDERS	5	15.04 ( 5.3 - 42.69 )	15.04 ( 46.25 )
NAIL OPERATION	SURGICAL AND MEDICAL PROCEDURES	5	1.57 ( 0.64 - 3.84 )	1.57 ( 0.99 )
INFECTED SKIN ULCER	INFECTIONS AND INFESTATIONS	5	0.59 ( 0.24 - 1.43 )	0.59 ( 1.39 )
COMPUTERISED TOMOGRAM ABNORMAL	INVESTIGATIONS	5	1.64 ( 0.67 - 4.02 )	1.64 ( 1.2 )
CENTRAL NERVOUS SYSTEM LESION	NERVOUS SYSTEM DISORDERS	5	0.84 ( 0.35 - 2.04 )	0.84 ( 0.15 )
CHOLECYSTITIS ACUTE	HEPATOBILIARY DISORDERS	5	0.97 ( 0.4 - 2.35 )	0.97 ( 0.01 )
TENDON RUPTURE	INJURY, POISONING AND PROCEDURAL COMPLICATIONS	5	0.12 ( 0.05 - 0.29 )	0.12 ( 32.62 )
APRAXIA	NERVOUS SYSTEM DISORDERS	5	10.62 ( 3.92 - 28.77 )	10.62 ( 33.65 )
WOUND COMPLICATION	INJURY, POISONING AND PROCEDURAL COMPLICATIONS	5	0.58 ( 0.24 - 1.41 )	0.58 ( 1.46 )
CARDIOGENIC SHOCK	CARDIAC DISORDERS	5	0.85 ( 0.35 - 2.07 )	0.85 ( 0.13 )
ANAEMIA MACROCYTIC	BLOOD AND LYMPHATIC SYSTEM DISORDERS	5	1.75 ( 0.71 - 4.3 )	1.75 ( 1.54 )
BLOOD MAGNESIUM INCREASED	INVESTIGATIONS	5	1.5 ( 0.61 - 3.68 )	1.5 ( 0.81 )
PLEURAL THICKENING	RESPIRATORY, THORACIC AND MEDIASTINAL DISORDERS	5	1.24 ( 0.51 - 3.01 )	1.24 ( 0.22 )
PRESBYACUSIS	EAR AND LABYRINTH DISORDERS	5	1.22 ( 0.5 - 2.97 )	1.22 ( 0.19 )
HAND FRACTURE	INJURY, POISONING AND PROCEDURAL COMPLICATIONS	5	0.27 ( 0.11 - 0.64 )	0.27 ( 10.07 )
ANOSMIA	NERVOUS SYSTEM DISORDERS	5	0.66 ( 0.27 - 1.61 )	0.66 ( 0.84 )
WALKING DISABILITY	SOCIAL CIRCUMSTANCES	5	1.46 ( 0.6 - 3.56 )	1.46 ( 0.68 )
PREMATURE LABOUR	PREGNANCY, PUERPERIUM AND PERINATAL CONDITIONS	5	1.39 ( 0.57 - 3.39 )	1.39 ( 0.52 )
HYPERTRIGLYCERIDAEMIA	METABOLISM AND NUTRITION DISORDERS	5	2.65 ( 1.07 - 6.58 )	2.65 ( 4.8 )
MUSCLE TWITCHING	MUSCULOSKELETAL AND CONNECTIVE TISSUE DISORDERS	5	0.43 ( 0.18 - 1.05 )	0.43 ( 3.63 )
JOINT CONTRACTURE	MUSCULOSKELETAL AND CONNECTIVE TISSUE DISORDERS	5	1.86 ( 0.76 - 4.57 )	1.86 ( 1.89 )
PELVIC FRACTURE	INJURY, POISONING AND PROCEDURAL COMPLICATIONS	5	0.2 ( 0.08 - 0.48 )	0.2 ( 16.17 )
SEASONAL ALLERGY	IMMUNE SYSTEM DISORDERS	5	0.2 ( 0.08 - 0.48 )	0.2 ( 15.99 )
FOETAL DEATH	PREGNANCY, PUERPERIUM AND PERINATAL CONDITIONS	5	0.66 ( 0.27 - 1.59 )	0.66 ( 0.88 )
GASTROINTESTINAL CANDIDIASIS	INFECTIONS AND INFESTATIONS	5	8.59 ( 3.24 - 22.79 )	8.59 ( 27.1 )
MYOCARDITIS	CARDIAC DISORDERS	5	1.13 ( 0.46 - 2.75 )	1.13 ( 0.07 )
ABORTION MISSED	PREGNANCY, PUERPERIUM AND PERINATAL CONDITIONS	5	6.68 ( 2.57 - 17.36 )	6.68 ( 20.39 )
DERMATITIS PSORIASIFORM	SKIN AND SUBCUTANEOUS TISSUE DISORDERS	5	0.82 ( 0.34 - 1.98 )	0.82 ( 0.2 )
FUNGAL SKIN INFECTION	INFECTIONS AND INFESTATIONS	5	0.35 ( 0.15 - 0.85 )	0.35 ( 5.84 )
DEVICE OCCLUSION	PRODUCT ISSUES	5	1.88 ( 0.76 - 4.62 )	1.88 ( 1.96 )
BICYTOPENIA	BLOOD AND LYMPHATIC SYSTEM DISORDERS	5	1.23 ( 0.5 - 2.99 )	1.23 ( 0.2 )
T-CELL LYMPHOMA	NEOPLASMS BENIGN, MALIGNANT AND UNSPECIFIED (INCL CYSTS AND POLYPS)	5	1.92 ( 0.78 - 4.72 )	1.92 ( 2.09 )
SPONDYLITIS	MUSCULOSKELETAL AND CONNECTIVE TISSUE DISORDERS	5	0.37 ( 0.15 - 0.89 )	0.37 ( 5.29 )
SKIN SWELLING	SKIN AND SUBCUTANEOUS TISSUE DISORDERS	5	0.7 ( 0.29 - 1.69 )	0.7 ( 0.63 )
PLANTAR FASCIITIS	MUSCULOSKELETAL AND CONNECTIVE TISSUE DISORDERS	5	0.62 ( 0.26 - 1.51 )	0.62 ( 1.13 )
ANAL FISSURE	GASTROINTESTINAL DISORDERS	5	1.37 ( 0.56 - 3.34 )	1.37 ( 0.47 )
MEAN CELL HAEMOGLOBIN CONCENTRATION DECREASED	INVESTIGATIONS	5	3.17 ( 1.27 - 7.9 )	3.17 ( 6.81 )
URINE ODOUR ABNORMAL	RENAL AND URINARY DISORDERS	5	0.66 ( 0.27 - 1.59 )	0.66 ( 0.87 )
MUCOUS STOOLS	GASTROINTESTINAL DISORDERS	5	2.07 ( 0.84 - 5.11 )	2.07 ( 2.63 )
MASS	GENERAL DISORDERS AND ADMINISTRATION SITE CONDITIONS	5	0.12 ( 0.05 - 0.29 )	0.12 ( 32.42 )
PULMONARY SEPSIS	INFECTIONS AND INFESTATIONS	5	1.75 ( 0.71 - 4.3 )	1.75 ( 1.54 )
APHONIA	RESPIRATORY, THORACIC AND MEDIASTINAL DISORDERS	5	0.19 ( 0.08 - 0.46 )	0.19 ( 17.19 )
ANURIA	RENAL AND URINARY DISORDERS	5	1.53 ( 0.62 - 3.74 )	1.53 ( 0.88 )
SINUS DISORDER	RESPIRATORY, THORACIC AND MEDIASTINAL DISORDERS	5	0.09 ( 0.04 - 0.22 )	0.09 ( 45.17 )
DRUG INEFFECTIVE FOR UNAPPROVED INDICATION	GENERAL DISORDERS AND ADMINISTRATION SITE CONDITIONS	5	0.33 ( 0.14 - 0.79 )	0.33 ( 6.89 )
HYDROCELE	CONGENITAL, FAMILIAL AND GENETIC DISORDERS	5	4.51 ( 1.78 - 11.43 )	4.51 ( 12.15 )
DRUG LEVEL INCREASED	INVESTIGATIONS	5	1.86 ( 0.76 - 4.57 )	1.86 ( 1.89 )
EXERCISE TOLERANCE DECREASED	GENERAL DISORDERS AND ADMINISTRATION SITE CONDITIONS	5	1.07 ( 0.44 - 2.6 )	1.07 ( 0.02 )
WRIST SURGERY	SURGICAL AND MEDICAL PROCEDURES	5	0.65 ( 0.27 - 1.58 )	0.65 ( 0.9 )
GASTRIC BYPASS	SURGICAL AND MEDICAL PROCEDURES	5	1.28 ( 0.52 - 3.12 )	1.28 ( 0.3 )
ORTHOSTATIC HYPOTENSION	VASCULAR DISORDERS	5	1.05 ( 0.43 - 2.55 )	1.05 ( 0.01 )
SURGICAL FAILURE	GENERAL DISORDERS AND ADMINISTRATION SITE CONDITIONS	5	0.58 ( 0.24 - 1.41 )	0.58 ( 1.46 )
INJECTION SITE INDURATION	GENERAL DISORDERS AND ADMINISTRATION SITE CONDITIONS	5	0.07 ( 0.03 - 0.16 )	0.07 ( 64.36 )
BURSITIS INFECTIVE	INFECTIONS AND INFESTATIONS	5	1.01 ( 0.41 - 2.45 )	1.01 ( 0 )
RESPIRATORY ARREST	RESPIRATORY, THORACIC AND MEDIASTINAL DISORDERS	5	0.45 ( 0.19 - 1.1 )	0.45 ( 3.23 )
ACTINOMYCOSIS	INFECTIONS AND INFESTATIONS	5	6.02 ( 2.33 - 15.5 )	6.02 ( 17.92 )
ANAL ABSCESS	INFECTIONS AND INFESTATIONS	5	0.79 ( 0.33 - 1.93 )	0.79 ( 0.26 )
RHONCHI	RESPIRATORY, THORACIC AND MEDIASTINAL DISORDERS	5	6.22 ( 2.41 - 16.08 )	6.22 ( 18.69 )
SWOLLEN JOINT COUNT	INVESTIGATIONS	5	1.8 ( 0.74 - 4.43 )	1.8 ( 1.71 )
TONSILLITIS	INFECTIONS AND INFESTATIONS	5	0.34 ( 0.14 - 0.82 )	0.34 ( 6.28 )
RHINITIS ALLERGIC	RESPIRATORY, THORACIC AND MEDIASTINAL DISORDERS	5	0.97 ( 0.4 - 2.35 )	0.97 ( 0.01 )
INFECTION SUSCEPTIBILITY INCREASED	INFECTIONS AND INFESTATIONS	5	0.72 ( 0.3 - 1.74 )	0.72 ( 0.54 )
OESOPHAGITIS	GASTROINTESTINAL DISORDERS	5	0.55 ( 0.23 - 1.32 )	0.55 ( 1.85 )
HEPATITIS CHOLESTATIC	HEPATOBILIARY DISORDERS	5	3.76 ( 1.5 - 9.44 )	3.76 ( 9.17 )
CHOLURIA	RENAL AND URINARY DISORDERS	5	22.56 ( 7.38 - 68.96 )	22.56 ( 63.39 )
GENERALISED TONIC-CLONIC SEIZURE	NERVOUS SYSTEM DISORDERS	5	1.37 ( 0.56 - 3.34 )	1.37 ( 0.47 )
ACUTE FEBRILE NEUTROPHILIC DERMATOSIS	SKIN AND SUBCUTANEOUS TISSUE DISORDERS	5	2.07 ( 0.84 - 5.11 )	2.07 ( 2.63 )
RETINAL HAEMORRHAGE	EYE DISORDERS	5	1.41 ( 0.58 - 3.45 )	1.41 ( 0.57 )
DEMYELINATING POLYNEUROPATHY	NERVOUS SYSTEM DISORDERS	5	2.86 ( 1.15 - 7.12 )	2.86 ( 5.62 )
CEREBRAL DISORDER	NERVOUS SYSTEM DISORDERS	5	0.69 ( 0.28 - 1.66 )	0.69 ( 0.7 )
URINARY TRACT INFECTION BACTERIAL	INFECTIONS AND INFESTATIONS	5	0.87 ( 0.36 - 2.11 )	0.87 ( 0.1 )
HYDRONEPHROSIS	RENAL AND URINARY DISORDERS	5	0.76 ( 0.31 - 1.85 )	0.76 ( 0.37 )
AREFLEXIA	NERVOUS SYSTEM DISORDERS	5	4.51 ( 1.78 - 11.43 )	4.51 ( 12.15 )
ATLANTOAXIAL INSTABILITY	MUSCULOSKELETAL AND CONNECTIVE TISSUE DISORDERS	5	2.91 ( 1.17 - 7.24 )	2.91 ( 5.8 )
MINERAL METABOLISM DISORDER	METABOLISM AND NUTRITION DISORDERS	5	3.76 ( 1.5 - 9.44 )	3.76 ( 9.17 )
SPINAL INSTABILITY	MUSCULOSKELETAL AND CONNECTIVE TISSUE DISORDERS	5	2.17 ( 0.88 - 5.36 )	2.17 ( 2.99 )
VENOUS THROMBOSIS	VASCULAR DISORDERS	5	1.75 ( 0.71 - 4.3 )	1.75 ( 1.54 )
DIFFUSE LARGE B-CELL LYMPHOMA	NEOPLASMS BENIGN, MALIGNANT AND UNSPECIFIED (INCL CYSTS AND POLYPS)	5	0.22 ( 0.09 - 0.54 )	0.22 ( 13.35 )
NEOPLASM SKIN	NEOPLASMS BENIGN, MALIGNANT AND UNSPECIFIED (INCL CYSTS AND POLYPS)	5	0.94 ( 0.38 - 2.27 )	0.94 ( 0.02 )
GASTROINTESTINAL ULCER	GASTROINTESTINAL DISORDERS	5	1.52 ( 0.62 - 3.71 )	1.52 ( 0.84 )
ALOPECIA AREATA	SKIN AND SUBCUTANEOUS TISSUE DISORDERS	5	3.54 ( 1.41 - 8.87 )	3.54 ( 8.29 )
NEEDLE ISSUE	PRODUCT ISSUES	5	0.11 ( 0.05 - 0.27 )	0.11 ( 35.05 )
MEAN CELL HAEMOGLOBIN DECREASED	INVESTIGATIONS	5	1.53 ( 0.62 - 3.74 )	1.53 ( 0.88 )
ATYPICAL MYCOBACTERIAL INFECTION	INFECTIONS AND INFESTATIONS	5	0.76 ( 0.32 - 1.85 )	0.76 ( 0.35 )
WHITE BLOOD CELL COUNT ABNORMAL	INVESTIGATIONS	5	0.45 ( 0.19 - 1.09 )	0.45 ( 3.28 )
ANTI-NEUTROPHIL CYTOPLASMIC ANTIBODY POSITIVE VASCULITIS	IMMUNE SYSTEM DISORDERS	5	1.9 ( 0.77 - 4.67 )	1.9 ( 2.02 )
LUNG ADENOCARCINOMA	NEOPLASMS BENIGN, MALIGNANT AND UNSPECIFIED (INCL CYSTS AND POLYPS)	5	0.45 ( 0.19 - 1.09 )	0.45 ( 3.3 )
NAIL BED INFLAMMATION	SKIN AND SUBCUTANEOUS TISSUE DISORDERS	5	6.45 ( 2.49 - 16.69 )	6.44 ( 19.52 )
PNEUMONIA LEGIONELLA	INFECTIONS AND INFESTATIONS	5	0.65 ( 0.27 - 1.57 )	0.65 ( 0.95 )
PORPHYRIA ACUTE	CONGENITAL, FAMILIAL AND GENETIC DISORDERS	5	1.3 ( 0.53 - 3.17 )	1.3 ( 0.33 )
BONE LOSS	MUSCULOSKELETAL AND CONNECTIVE TISSUE DISORDERS	5	0.6 ( 0.25 - 1.46 )	0.6 ( 1.3 )
PSYCHOMOTOR HYPERACTIVITY	NERVOUS SYSTEM DISORDERS	5	1.19 ( 0.49 - 2.89 )	1.19 ( 0.14 )
CORONARY ARTERY BYPASS	SURGICAL AND MEDICAL PROCEDURES	5	0.81 ( 0.33 - 1.95 )	0.81 ( 0.23 )
SUBACUTE CUTANEOUS LUPUS ERYTHEMATOSUS	SKIN AND SUBCUTANEOUS TISSUE DISORDERS	5	5.31 ( 2.08 - 13.57 )	5.31 ( 15.24 )
EPIDERMAL NECROSIS	SKIN AND SUBCUTANEOUS TISSUE DISORDERS	5	7.22 ( 2.76 - 18.86 )	7.22 ( 22.32 )
ANTIPHOSPHOLIPID ANTIBODIES POSITIVE	INVESTIGATIONS	5	4.51 ( 1.78 - 11.43 )	4.51 ( 12.15 )
ACTINIC KERATOSIS	SKIN AND SUBCUTANEOUS TISSUE DISORDERS	5	1.13 ( 0.47 - 2.76 )	1.13 ( 0.08 )
ADRENAL DISORDER	ENDOCRINE DISORDERS	5	2.26 ( 0.91 - 5.57 )	2.26 ( 3.29 )
HEAD TITUBATION	NERVOUS SYSTEM DISORDERS	5	7.52 ( 2.87 - 19.71 )	7.52 ( 23.39 )
HEPATIC CYTOLYSIS	HEPATOBILIARY DISORDERS	5	2.41 ( 0.97 - 5.95 )	2.41 ( 3.85 )
WRONG TECHNIQUE IN DEVICE USAGE PROCESS	INJURY, POISONING AND PROCEDURAL COMPLICATIONS	5	0.53 ( 0.22 - 1.29 )	0.53 ( 2.02 )
CHOLANGITIS SCLEROSING	HEPATOBILIARY DISORDERS	5	4.2 ( 1.66 - 10.6 )	4.2 ( 10.91 )
ABDOMINAL PAIN LOWER	GASTROINTESTINAL DISORDERS	5	0.29 ( 0.12 - 0.7 )	0.29 ( 8.69 )
CONJUNCTIVAL HYPERAEMIA	EYE DISORDERS	5	3.92 ( 1.56 - 9.87 )	3.92 ( 9.82 )
PHOTOPHOBIA	EYE DISORDERS	5	0.31 ( 0.13 - 0.76 )	0.31 ( 7.46 )
METASTASES TO MENINGES	NEOPLASMS BENIGN, MALIGNANT AND UNSPECIFIED (INCL CYSTS AND POLYPS)	5	9.5 ( 3.55 - 25.44 )	9.5 ( 30.1 )
BLOOD IMMUNOGLOBULIN G INCREASED	INVESTIGATIONS	5	2.41 ( 0.97 - 5.95 )	2.41 ( 3.85 )
BLOOD IMMUNOGLOBULIN M INCREASED	INVESTIGATIONS	5	3.84 ( 1.53 - 9.65 )	3.84 ( 9.49 )
RHEUMATOID MENINGITIS	NERVOUS SYSTEM DISORDERS	5	20.05 ( 6.72 - 59.83 )	20.05 ( 58.18 )
MIXED LIVER INJURY	HEPATOBILIARY DISORDERS	5	30.08 ( 9.18 - 98.56 )	30.08 ( 76.66 )
GASTRIC ULCER HAEMORRHAGE	GASTROINTESTINAL DISORDERS	5	0.75 ( 0.31 - 1.82 )	0.75 ( 0.41 )
VENTRICULAR TACHYCARDIA	CARDIAC DISORDERS	5	1 ( 0.41 - 2.42 )	1 ( 0 )
LARGE INTESTINAL ULCER	GASTROINTESTINAL DISORDERS	5	1.6 ( 0.65 - 3.91 )	1.6 ( 1.07 )
ATAXIA	NERVOUS SYSTEM DISORDERS	5	1.47 ( 0.6 - 3.59 )	1.47 ( 0.71 )
BRONCHOPULMONARY ASPERGILLOSIS	INFECTIONS AND INFESTATIONS	5	0.77 ( 0.32 - 1.88 )	0.77 ( 0.32 )
DISSEMINATED TUBERCULOSIS	INFECTIONS AND INFESTATIONS	5	0.41 ( 0.17 - 0.99 )	0.41 ( 4.19 )
PO2 DECREASED	INVESTIGATIONS	5	6.94 ( 2.67 - 18.08 )	6.94 ( 21.32 )
PHARYNGEAL ULCERATION	RESPIRATORY, THORACIC AND MEDIASTINAL DISORDERS	5	2.37 ( 0.96 - 5.87 )	2.37 ( 3.73 )
SMALL INTESTINAL OBSTRUCTION	GASTROINTESTINAL DISORDERS	5	0.7 ( 0.29 - 1.69 )	0.7 ( 0.63 )
VENTRICULAR HYPERTROPHY	CARDIAC DISORDERS	5	2.34 ( 0.95 - 5.79 )	2.34 ( 3.62 )
MYASTHENIA GRAVIS	NERVOUS SYSTEM DISORDERS	5	1.03 ( 0.42 - 2.51 )	1.03 ( 0 )
TROPONIN INCREASED	INVESTIGATIONS	5	1.52 ( 0.62 - 3.71 )	1.52 ( 0.84 )
HAEMATOMA	VASCULAR DISORDERS	5	0.18 ( 0.08 - 0.44 )	0.18 ( 18.17 )
HYPOPROTEINAEMIA	METABOLISM AND NUTRITION DISORDERS	5	4.2 ( 1.66 - 10.6 )	4.2 ( 10.91 )
VENTRICULAR DYSFUNCTION	CARDIAC DISORDERS	5	2.47 ( 1 - 6.12 )	2.47 ( 4.1 )
ALVEOLITIS	RESPIRATORY, THORACIC AND MEDIASTINAL DISORDERS	5	1.05 ( 0.43 - 2.55 )	1.05 ( 0.01 )
LEPROMATOUS LEPROSY	INFECTIONS AND INFESTATIONS	5	30.08 ( 9.18 - 98.56 )	30.08 ( 76.66 )
B-CELL LYMPHOMA	NEOPLASMS BENIGN, MALIGNANT AND UNSPECIFIED (INCL CYSTS AND POLYPS)	4	0.31 ( 0.12 - 0.84 )	0.31 ( 5.97 )
BLOOD GLUCOSE ABNORMAL	INVESTIGATIONS	4	0.33 ( 0.12 - 0.89 )	0.33 ( 5.31 )
POLYDIPSIA	METABOLISM AND NUTRITION DISORDERS	4	3.9 ( 1.39 - 10.95 )	3.9 ( 7.79 )
PREMATURE RUPTURE OF MEMBRANES	PREGNANCY, PUERPERIUM AND PERINATAL CONDITIONS	4	1.68 ( 0.62 - 4.57 )	1.68 ( 1.05 )
GINGIVAL DISORDER	GASTROINTESTINAL DISORDERS	4	0.61 ( 0.23 - 1.64 )	0.61 ( 0.99 )
ATROPHY	GENERAL DISORDERS AND ADMINISTRATION SITE CONDITIONS	4	1.02 ( 0.38 - 2.75 )	1.02 ( 0 )
LYMPHOPROLIFERATIVE DISORDER	NEOPLASMS BENIGN, MALIGNANT AND UNSPECIFIED (INCL CYSTS AND POLYPS)	4	0.13 ( 0.05 - 0.35 )	0.13 ( 22.79 )
ABNORMAL BEHAVIOUR	PSYCHIATRIC DISORDERS	4	0.69 ( 0.26 - 1.86 )	0.69 ( 0.54 )
COMPUTERISED TOMOGRAM THORAX ABNORMAL	INVESTIGATIONS	4	2.37 ( 0.86 - 6.51 )	2.37 ( 2.96 )
THERAPEUTIC RESPONSE UNEXPECTED	GENERAL DISORDERS AND ADMINISTRATION SITE CONDITIONS	4	0.1 ( 0.04 - 0.26 )	0.1 ( 32.94 )
CLOSTRIDIUM DIFFICILE COLITIS	INFECTIONS AND INFESTATIONS	4	0.66 ( 0.25 - 1.77 )	0.66 ( 0.69 )
FIBULA FRACTURE	INJURY, POISONING AND PROCEDURAL COMPLICATIONS	4	0.48 ( 0.18 - 1.29 )	0.48 ( 2.23 )
EYE INFLAMMATION	EYE DISORDERS	4	0.25 ( 0.09 - 0.66 )	0.25 ( 9.06 )
THINKING ABNORMAL	PSYCHIATRIC DISORDERS	4	0.5 ( 0.19 - 1.34 )	0.5 ( 2 )
ABSCESS INTESTINAL	INFECTIONS AND INFESTATIONS	4	1.13 ( 0.42 - 3.05 )	1.13 ( 0.06 )
PERITONITIS BACTERIAL	INFECTIONS AND INFESTATIONS	4	6.87 ( 2.36 - 20.03 )	6.87 ( 16.87 )
SUBDURAL HAEMATOMA	INJURY, POISONING AND PROCEDURAL COMPLICATIONS	4	0.88 ( 0.33 - 2.37 )	0.88 ( 0.06 )
FULL BLOOD COUNT ABNORMAL	INVESTIGATIONS	4	0.78 ( 0.29 - 2.1 )	0.78 ( 0.24 )
GASTROINTESTINAL CARCINOMA	NEOPLASMS BENIGN, MALIGNANT AND UNSPECIFIED (INCL CYSTS AND POLYPS)	4	0.64 ( 0.24 - 1.72 )	0.64 ( 0.8 )
ORGAN FAILURE	GENERAL DISORDERS AND ADMINISTRATION SITE CONDITIONS	4	1.6 ( 0.59 - 4.37 )	1.6 ( 0.87 )
INCREASED UPPER AIRWAY SECRETION	RESPIRATORY, THORACIC AND MEDIASTINAL DISORDERS	4	0.26 ( 0.1 - 0.69 )	0.26 ( 8.44 )
COLD SWEAT	SKIN AND SUBCUTANEOUS TISSUE DISORDERS	4	0.28 ( 0.1 - 0.74 )	0.28 ( 7.46 )
BUNION OPERATION	SURGICAL AND MEDICAL PROCEDURES	4	0.89 ( 0.33 - 2.39 )	0.89 ( 0.06 )
SKIN WARM	SKIN AND SUBCUTANEOUS TISSUE DISORDERS	4	0.4 ( 0.15 - 1.07 )	0.4 ( 3.59 )
LEG AMPUTATION	SURGICAL AND MEDICAL PROCEDURES	4	0.84 ( 0.31 - 2.26 )	0.84 ( 0.12 )
SKIN DEPIGMENTATION	SKIN AND SUBCUTANEOUS TISSUE DISORDERS	4	1.83 ( 0.67 - 4.99 )	1.83 ( 1.43 )
SOFT TISSUE NECROSIS	MUSCULOSKELETAL AND CONNECTIVE TISSUE DISORDERS	4	7.22 ( 2.47 - 21.12 )	7.22 ( 17.86 )
EYE OPERATION	SURGICAL AND MEDICAL PROCEDURES	4	0.31 ( 0.11 - 0.82 )	0.31 ( 6.25 )
NEUROGENIC BLADDER	RENAL AND URINARY DISORDERS	4	2.03 ( 0.74 - 5.57 )	2.03 ( 1.99 )
EYE SWELLING	EYE DISORDERS	4	0.11 ( 0.04 - 0.3 )	0.11 ( 27.59 )
MUSCLE FATIGUE	MUSCULOSKELETAL AND CONNECTIVE TISSUE DISORDERS	4	0.69 ( 0.26 - 1.87 )	0.69 ( 0.53 )
CHOLECYSTITIS INFECTIVE	INFECTIONS AND INFESTATIONS	4	0.73 ( 0.27 - 1.96 )	0.73 ( 0.39 )
DRUG LEVEL ABOVE THERAPEUTIC	INVESTIGATIONS	4	4.37 ( 1.55 - 12.35 )	4.37 ( 9.29 )
THERAPEUTIC PRODUCT INEFFECTIVE	GENERAL DISORDERS AND ADMINISTRATION SITE CONDITIONS	4	1.43 ( 0.53 - 3.88 )	1.43 ( 0.5 )
THYROIDITIS	ENDOCRINE DISORDERS	4	3.52 ( 1.26 - 9.83 )	3.52 ( 6.58 )
MALABSORPTION	GASTROINTESTINAL DISORDERS	4	1.36 ( 0.5 - 3.7 )	1.36 ( 0.37 )
INTERVERTEBRAL DISCITIS	INFECTIONS AND INFESTATIONS	4	0.56 ( 0.21 - 1.51 )	0.56 ( 1.33 )
SKIN HYPERTROPHY	SKIN AND SUBCUTANEOUS TISSUE DISORDERS	4	0.95 ( 0.35 - 2.56 )	0.95 ( 0.01 )
IRITIS	EYE DISORDERS	4	0.64 ( 0.24 - 1.73 )	0.64 ( 0.77 )
SKIN IRRITATION	SKIN AND SUBCUTANEOUS TISSUE DISORDERS	4	0.29 ( 0.11 - 0.78 )	0.29 ( 6.75 )
QUADRIPLEGIA	NERVOUS SYSTEM DISORDERS	4	4.12 ( 1.47 - 11.61 )	4.12 ( 8.5 )
INJECTION SITE HAEMORRHAGE	GENERAL DISORDERS AND ADMINISTRATION SITE CONDITIONS	4	0.01 ( 0.01 - 0.04 )	0.01 ( 267.35 )
ODYNOPHAGIA	GASTROINTESTINAL DISORDERS	4	0.67 ( 0.25 - 1.81 )	0.67 ( 0.62 )
PHYSICAL DISABILITY	SOCIAL CIRCUMSTANCES	4	0.85 ( 0.32 - 2.29 )	0.85 ( 0.1 )
MENOPAUSAL SYMPTOMS	REPRODUCTIVE SYSTEM AND BREAST DISORDERS	4	1.64 ( 0.6 - 4.47 )	1.64 ( 0.96 )
RETINAL DISORDER	EYE DISORDERS	4	1.07 ( 0.4 - 2.89 )	1.07 ( 0.02 )
BLOOD URIC ACID DECREASED	INVESTIGATIONS	4	12.03 ( 3.88 - 37.3 )	12.03 ( 30.34 )
BREAST CYST EXCISION	SURGICAL AND MEDICAL PROCEDURES	4	7.6 ( 2.58 - 22.34 )	7.6 ( 18.93 )
TOE OPERATION	SURGICAL AND MEDICAL PROCEDURES	4	0.66 ( 0.25 - 1.78 )	0.66 ( 0.68 )
GASTROINTESTINAL INFECTION	INFECTIONS AND INFESTATIONS	4	0.16 ( 0.06 - 0.43 )	0.16 ( 17.34 )
ANGIOPATHY	VASCULAR DISORDERS	4	0.58 ( 0.21 - 1.54 )	0.58 ( 1.24 )
EYELID OEDEMA	EYE DISORDERS	4	0.51 ( 0.19 - 1.38 )	0.51 ( 1.82 )
SPINAL CORD COMPRESSION	NERVOUS SYSTEM DISORDERS	4	0.51 ( 0.19 - 1.37 )	0.51 ( 1.86 )
ALCOHOL USE	SOCIAL CIRCUMSTANCES	4	4.81 ( 1.7 - 13.66 )	4.81 ( 10.66 )
PULMONARY PAIN	RESPIRATORY, THORACIC AND MEDIASTINAL DISORDERS	4	0.51 ( 0.19 - 1.38 )	0.51 ( 1.82 )
HYPERPYREXIA	GENERAL DISORDERS AND ADMINISTRATION SITE CONDITIONS	4	4.98 ( 1.75 - 14.16 )	4.98 ( 11.17 )
OCCULT BLOOD POSITIVE	INVESTIGATIONS	4	2.06 ( 0.75 - 5.65 )	2.06 ( 2.07 )
BONE GRAFT	SURGICAL AND MEDICAL PROCEDURES	4	0.98 ( 0.36 - 2.65 )	0.98 ( 0 )
GENERAL PHYSICAL CONDITION ABNORMAL	INVESTIGATIONS	4	0.6 ( 0.22 - 1.61 )	0.6 ( 1.06 )
ROSACEA	SKIN AND SUBCUTANEOUS TISSUE DISORDERS	4	0.48 ( 0.18 - 1.29 )	0.48 ( 2.23 )
URINE ABNORMALITY	RENAL AND URINARY DISORDERS	4	0.76 ( 0.28 - 2.05 )	0.76 ( 0.3 )
HEPATOSPLENOMEGALY	HEPATOBILIARY DISORDERS	4	1.57 ( 0.58 - 4.27 )	1.57 ( 0.79 )
BRAIN ABSCESS	INFECTIONS AND INFESTATIONS	4	1.6 ( 0.59 - 4.37 )	1.6 ( 0.87 )
LYMPHADENOPATHY MEDIASTINAL	BLOOD AND LYMPHATIC SYSTEM DISORDERS	4	1.3 ( 0.48 - 3.53 )	1.3 ( 0.27 )
ESSENTIAL HYPERTENSION	VASCULAR DISORDERS	4	1.66 ( 0.61 - 4.52 )	1.66 ( 1 )
DIABETIC KETOACIDOSIS	METABOLISM AND NUTRITION DISORDERS	4	0.98 ( 0.36 - 2.65 )	0.98 ( 0 )
MYOCARDIAL ISCHAEMIA	CARDIAC DISORDERS	4	0.32 ( 0.12 - 0.85 )	0.32 ( 5.85 )
RESTLESS LEGS SYNDROME	NERVOUS SYSTEM DISORDERS	4	0.27 ( 0.1 - 0.72 )	0.27 ( 7.9 )
MOUTH SWELLING	GASTROINTESTINAL DISORDERS	4	0.56 ( 0.21 - 1.5 )	0.56 ( 1.38 )
MUSCULOSKELETAL CHEST PAIN	MUSCULOSKELETAL AND CONNECTIVE TISSUE DISORDERS	4	0.15 ( 0.05 - 0.39 )	0.15 ( 19.86 )
DEMENTIA	NERVOUS SYSTEM DISORDERS	4	0.16 ( 0.06 - 0.44 )	0.16 ( 17.1 )
VITAMIN D DEFICIENCY	METABOLISM AND NUTRITION DISORDERS	4	0.29 ( 0.11 - 0.78 )	0.29 ( 6.83 )
LEFT VENTRICULAR FAILURE	CARDIAC DISORDERS	4	0.88 ( 0.33 - 2.37 )	0.88 ( 0.06 )
HYPERLEUKOCYTOSIS	BLOOD AND LYMPHATIC SYSTEM DISORDERS	4	14.44 ( 4.53 - 46.03 )	14.44 ( 35.73 )
SYSTEMIC INFLAMMATORY RESPONSE SYNDROME	GENERAL DISORDERS AND ADMINISTRATION SITE CONDITIONS	4	1.04 ( 0.38 - 2.81 )	1.04 ( 0.01 )
URETHRITIS	INFECTIONS AND INFESTATIONS	4	7.22 ( 2.47 - 21.12 )	7.22 ( 17.86 )
PHLEBITIS	VASCULAR DISORDERS	4	0.43 ( 0.16 - 1.15 )	0.43 ( 3.02 )
INTERFERON GAMMA RELEASE ASSAY POSITIVE	INVESTIGATIONS	4	4.37 ( 1.55 - 12.35 )	4.37 ( 9.29 )
STILL'S DISEASE	MUSCULOSKELETAL AND CONNECTIVE TISSUE DISORDERS	4	3.44 ( 1.23 - 9.59 )	3.44 ( 6.31 )
POST PROCEDURAL HAEMORRHAGE	INJURY, POISONING AND PROCEDURAL COMPLICATIONS	4	0.41 ( 0.15 - 1.09 )	0.41 ( 3.45 )
DERMO-HYPODERMITIS	INFECTIONS AND INFESTATIONS	4	4.81 ( 1.7 - 13.66 )	4.81 ( 10.66 )
RHINITIS	INFECTIONS AND INFESTATIONS	4	0.21 ( 0.08 - 0.56 )	0.21 ( 11.86 )
CACHEXIA	METABOLISM AND NUTRITION DISORDERS	4	1.15 ( 0.42 - 3.1 )	1.15 ( 0.07 )
PATENT DUCTUS ARTERIOSUS	CONGENITAL, FAMILIAL AND GENETIC DISORDERS	4	9.02 ( 3.02 - 26.99 )	9.02 ( 22.83 )
FELTY'S SYNDROME	MUSCULOSKELETAL AND CONNECTIVE TISSUE DISORDERS	4	1.17 ( 0.43 - 3.18 )	1.17 ( 0.1 )
MIGRAINE WITH AURA	NERVOUS SYSTEM DISORDERS	4	1.37 ( 0.51 - 3.73 )	1.37 ( 0.39 )
MYELITIS TRANSVERSE	NERVOUS SYSTEM DISORDERS	4	1.95 ( 0.71 - 5.34 )	1.95 ( 1.76 )
PRODUCT QUALITY ISSUE	PRODUCT ISSUES	4	0.12 ( 0.04 - 0.31 )	0.12 ( 26.61 )
RESTRICTIVE PULMONARY DISEASE	RESPIRATORY, THORACIC AND MEDIASTINAL DISORDERS	4	3.14 ( 1.13 - 8.72 )	3.14 ( 5.36 )
SUBSTANCE-INDUCED PSYCHOTIC DISORDER	PSYCHIATRIC DISORDERS	4	3.7 ( 1.32 - 10.36 )	3.7 ( 7.15 )
INJECTION SITE WARMTH	GENERAL DISORDERS AND ADMINISTRATION SITE CONDITIONS	4	0.02 ( 0.01 - 0.06 )	0.02 ( 178.31 )
CONTRAINDICATION TO MEDICAL TREATMENT	SOCIAL CIRCUMSTANCES	4	2.06 ( 0.75 - 5.65 )	2.06 ( 2.07 )
NEUROENDOCRINE CARCINOMA OF THE SKIN	NEOPLASMS BENIGN, MALIGNANT AND UNSPECIFIED (INCL CYSTS AND POLYPS)	4	0.92 ( 0.34 - 2.48 )	0.92 ( 0.03 )
HIP SURGERY	SURGICAL AND MEDICAL PROCEDURES	4	0.17 ( 0.06 - 0.45 )	0.17 ( 16.24 )
GANGRENE	INFECTIONS AND INFESTATIONS	4	0.52 ( 0.19 - 1.38 )	0.52 ( 1.79 )
ADMINISTRATION SITE PRURITUS	GENERAL DISORDERS AND ADMINISTRATION SITE CONDITIONS	4	24.06 ( 6.79 - 85.27 )	24.06 ( 53.05 )
BODY HEIGHT DECREASED	INVESTIGATIONS	4	0.22 ( 0.08 - 0.6 )	0.22 ( 10.75 )
STRESS ULCER	GASTROINTESTINAL DISORDERS	4	10.31 ( 3.39 - 31.33 )	10.31 ( 26.16 )
OSTEOCHONDROSIS	MUSCULOSKELETAL AND CONNECTIVE TISSUE DISORDERS	4	1.27 ( 0.47 - 3.43 )	1.27 ( 0.22 )
ENTEROCUTANEOUS FISTULA	GASTROINTESTINAL DISORDERS	4	12.03 ( 3.88 - 37.3 )	12.03 ( 30.34 )
SHOCK HAEMORRHAGIC	VASCULAR DISORDERS	4	1.57 ( 0.58 - 4.27 )	1.57 ( 0.79 )
PUNCTURE SITE HAEMORRHAGE	GENERAL DISORDERS AND ADMINISTRATION SITE CONDITIONS	4	6.28 ( 2.17 - 18.15 )	6.28 ( 15.12 )
VITREOUS FLOATERS	EYE DISORDERS	4	0.5 ( 0.18 - 1.33 )	0.5 ( 2.02 )
FOOD POISONING	GASTROINTESTINAL DISORDERS	4	0.38 ( 0.14 - 1.03 )	0.38 ( 3.91 )
HYPOGEUSIA	NERVOUS SYSTEM DISORDERS	4	6.28 ( 2.17 - 18.15 )	6.28 ( 15.12 )
TASTE DISORDER	NERVOUS SYSTEM DISORDERS	4	0.35 ( 0.13 - 0.95 )	0.35 ( 4.67 )
PRURITUS ALLERGIC	SKIN AND SUBCUTANEOUS TISSUE DISORDERS	4	0.64 ( 0.24 - 1.72 )	0.64 ( 0.8 )
NECK INJURY	INJURY, POISONING AND PROCEDURAL COMPLICATIONS	4	0.77 ( 0.29 - 2.07 )	0.77 ( 0.27 )
LOSS OF EMPLOYMENT	SOCIAL CIRCUMSTANCES	4	1.9 ( 0.7 - 5.19 )	1.9 ( 1.62 )
ENZYME LEVEL INCREASED	INVESTIGATIONS	4	2.15 ( 0.79 - 5.91 )	2.15 ( 2.34 )
MELANOCYTIC NAEVUS	NEOPLASMS BENIGN, MALIGNANT AND UNSPECIFIED (INCL CYSTS AND POLYPS)	4	0.34 ( 0.13 - 0.91 )	0.34 ( 5.09 )
NEUTROPENIC SEPSIS	INFECTIONS AND INFESTATIONS	4	0.73 ( 0.27 - 1.95 )	0.73 ( 0.41 )
THROMBOTIC MICROANGIOPATHY	BLOOD AND LYMPHATIC SYSTEM DISORDERS	4	2.72 ( 0.99 - 7.53 )	2.72 ( 4.06 )
LABILE BLOOD PRESSURE	VASCULAR DISORDERS	4	1.47 ( 0.54 - 4 )	1.47 ( 0.58 )
EAR PRURITUS	EAR AND LABYRINTH DISORDERS	4	0.44 ( 0.17 - 1.19 )	0.44 ( 2.77 )
ARTHROPOD STING	INJURY, POISONING AND PROCEDURAL COMPLICATIONS	4	0.64 ( 0.24 - 1.72 )	0.64 ( 0.8 )
OLIGURIA	RENAL AND URINARY DISORDERS	4	2.58 ( 0.93 - 7.11 )	2.58 ( 3.61 )
SINUS HEADACHE	NERVOUS SYSTEM DISORDERS	4	0.17 ( 0.06 - 0.46 )	0.17 ( 15.7 )
LUMBAR VERTEBRAL FRACTURE	INJURY, POISONING AND PROCEDURAL COMPLICATIONS	4	0.35 ( 0.13 - 0.94 )	0.35 ( 4.8 )
OTITIS EXTERNA	INFECTIONS AND INFESTATIONS	4	2.26 ( 0.82 - 6.19 )	2.26 ( 2.63 )
DEATH NEONATAL	GENERAL DISORDERS AND ADMINISTRATION SITE CONDITIONS	4	2.49 ( 0.9 - 6.86 )	2.49 ( 3.33 )
HYPOMAGNESAEMIA	METABOLISM AND NUTRITION DISORDERS	4	1.7 ( 0.62 - 4.63 )	1.7 ( 1.1 )
HYPOPHOSPHATAEMIA	METABOLISM AND NUTRITION DISORDERS	4	6.02 ( 2.09 - 17.34 )	6.02 ( 14.34 )
FIBRIN D DIMER INCREASED	INVESTIGATIONS	4	1.05 ( 0.39 - 2.83 )	1.05 ( 0.01 )
DRY THROAT	RESPIRATORY, THORACIC AND MEDIASTINAL DISORDERS	4	0.27 ( 0.1 - 0.71 )	0.27 ( 8 )
ERYTHEMA ANNULARE	SKIN AND SUBCUTANEOUS TISSUE DISORDERS	4	28.87 ( 7.75 - 107.53 )	28.87 ( 59.8 )
MYCOBACTERIAL INFECTION	INFECTIONS AND INFESTATIONS	4	0.7 ( 0.26 - 1.89 )	0.7 ( 0.49 )
HERPES OPHTHALMIC	INFECTIONS AND INFESTATIONS	4	1.06 ( 0.39 - 2.87 )	1.06 ( 0.01 )
BLOOD PRESSURE SYSTOLIC ABNORMAL	INVESTIGATIONS	4	0.11 ( 0.04 - 0.3 )	0.11 ( 28.03 )
ALLERGIC OEDEMA	IMMUNE SYSTEM DISORDERS	4	1.42 ( 0.52 - 3.84 )	1.42 ( 0.47 )
LACTOSE INTOLERANCE	METABOLISM AND NUTRITION DISORDERS	4	1.9 ( 0.7 - 5.19 )	1.9 ( 1.62 )
LIVER TRANSPLANT	SURGICAL AND MEDICAL PROCEDURES	4	4.98 ( 1.75 - 14.16 )	4.98 ( 11.17 )
PRODUCT PRESCRIBING ERROR	INJURY, POISONING AND PROCEDURAL COMPLICATIONS	4	0.23 ( 0.09 - 0.62 )	0.23 ( 10.18 )
MYOPATHY	MUSCULOSKELETAL AND CONNECTIVE TISSUE DISORDERS	4	0.78 ( 0.29 - 2.11 )	0.78 ( 0.23 )
MUCOSAL EROSION	GENERAL DISORDERS AND ADMINISTRATION SITE CONDITIONS	4	8.02 ( 2.71 - 23.7 )	8.02 ( 20.11 )
ASPERGILLUS INFECTION	INFECTIONS AND INFESTATIONS	4	1.08 ( 0.4 - 2.91 )	1.08 ( 0.02 )
SPINAL MENINGIOMA BENIGN	NEOPLASMS BENIGN, MALIGNANT AND UNSPECIFIED (INCL CYSTS AND POLYPS)	4	11.11 ( 3.62 - 34.06 )	11.11 ( 28.13 )
MYCOTIC ALLERGY	IMMUNE SYSTEM DISORDERS	4	3.07 ( 1.11 - 8.53 )	3.07 ( 5.15 )
TEARFULNESS	PSYCHIATRIC DISORDERS	4	1.54 ( 0.56 - 4.18 )	1.54 ( 0.72 )
PIGMENTATION DISORDER	SKIN AND SUBCUTANEOUS TISSUE DISORDERS	4	0.73 ( 0.27 - 1.96 )	0.73 ( 0.39 )
VISCERAL LEISHMANIASIS	INFECTIONS AND INFESTATIONS	4	1.22 ( 0.45 - 3.31 )	1.22 ( 0.16 )
SKIN HYPOPIGMENTATION	SKIN AND SUBCUTANEOUS TISSUE DISORDERS	4	5.55 ( 1.94 - 15.91 )	5.55 ( 12.94 )
APPENDICECTOMY	SURGICAL AND MEDICAL PROCEDURES	4	0.66 ( 0.24 - 1.76 )	0.66 ( 0.71 )
BREAST CANCER STAGE II	NEOPLASMS BENIGN, MALIGNANT AND UNSPECIFIED (INCL CYSTS AND POLYPS)	4	0.46 ( 0.17 - 1.23 )	0.46 ( 2.51 )
PLEURITIC PAIN	RESPIRATORY, THORACIC AND MEDIASTINAL DISORDERS	4	0.56 ( 0.21 - 1.5 )	0.56 ( 1.38 )
METASTATIC NEOPLASM	NEOPLASMS BENIGN, MALIGNANT AND UNSPECIFIED (INCL CYSTS AND POLYPS)	4	0.62 ( 0.23 - 1.68 )	0.62 ( 0.88 )
DIVERTICULUM INTESTINAL	GASTROINTESTINAL DISORDERS	4	0.55 ( 0.2 - 1.47 )	0.55 ( 1.46 )
BLOOD GLUCOSE DECREASED	INVESTIGATIONS	4	0.2 ( 0.08 - 0.54 )	0.2 ( 12.42 )
BLEPHAROSPASM	EYE DISORDERS	4	0.34 ( 0.13 - 0.9 )	0.34 ( 5.16 )
TONGUE BLISTERING	GASTROINTESTINAL DISORDERS	4	1.49 ( 0.55 - 4.05 )	1.49 ( 0.62 )
PNEUMONIA CRYPTOCOCCAL	INFECTIONS AND INFESTATIONS	4	1 ( 0.37 - 2.71 )	1 ( 0 )
PNEUMONIA KLEBSIELLA	INFECTIONS AND INFESTATIONS	4	1.83 ( 0.67 - 4.99 )	1.83 ( 1.43 )
HALLUCINATION, AUDITORY	PSYCHIATRIC DISORDERS	4	1.66 ( 0.61 - 4.52 )	1.66 ( 1 )
DEVICE RELATED INFECTION	INFECTIONS AND INFESTATIONS	4	0.19 ( 0.07 - 0.51 )	0.19 ( 13.51 )
DYSPHORIA	PSYCHIATRIC DISORDERS	4	9.02 ( 3.02 - 26.99 )	9.02 ( 22.83 )
WOUND DEHISCENCE	INJURY, POISONING AND PROCEDURAL COMPLICATIONS	4	0.47 ( 0.18 - 1.27 )	0.47 ( 2.34 )
BLOOD UREA DECREASED	INVESTIGATIONS	4	3.7 ( 1.32 - 10.36 )	3.7 ( 7.15 )
LIPASE INCREASED	INVESTIGATIONS	4	2.22 ( 0.81 - 6.1 )	2.22 ( 2.53 )
ACTIVATED PARTIAL THROMBOPLASTIN TIME PROLONGED	INVESTIGATIONS	4	2.95 ( 1.06 - 8.16 )	2.95 ( 4.75 )
HYPERAESTHESIA	NERVOUS SYSTEM DISORDERS	4	0.32 ( 0.12 - 0.85 )	0.32 ( 5.8 )
BLOOD GLUCOSE FLUCTUATION	INVESTIGATIONS	4	1.15 ( 0.43 - 3.13 )	1.15 ( 0.08 )
KAPOSI'S SARCOMA	NEOPLASMS BENIGN, MALIGNANT AND UNSPECIFIED (INCL CYSTS AND POLYPS)	4	1.31 ( 0.48 - 3.56 )	1.31 ( 0.29 )
HYPOREFLEXIA	NERVOUS SYSTEM DISORDERS	4	5.16 ( 1.81 - 14.7 )	5.16 ( 11.72 )
URINE ANALYSIS ABNORMAL	INVESTIGATIONS	4	1.47 ( 0.54 - 4 )	1.47 ( 0.58 )
REFUSAL OF TREATMENT BY PATIENT	SOCIAL CIRCUMSTANCES	4	1.6 ( 0.59 - 4.37 )	1.6 ( 0.87 )
GASTRIC CANCER	NEOPLASMS BENIGN, MALIGNANT AND UNSPECIFIED (INCL CYSTS AND POLYPS)	4	0.31 ( 0.12 - 0.83 )	0.31 ( 6.05 )
EOSINOPHIL PERCENTAGE INCREASED	INVESTIGATIONS	4	12.03 ( 3.88 - 37.3 )	12.03 ( 30.34 )
URINE OUTPUT DECREASED	INVESTIGATIONS	4	0.96 ( 0.36 - 2.6 )	0.96 ( 0.01 )
BLOOD CULTURE POSITIVE	INVESTIGATIONS	4	2.78 ( 1 - 7.68 )	2.78 ( 4.22 )
HEPATITIS FULMINANT	HEPATOBILIARY DISORDERS	4	2.67 ( 0.97 - 7.38 )	2.67 ( 3.9 )
PROTHROMBIN TIME SHORTENED	INVESTIGATIONS	4	8.49 ( 2.86 - 25.24 )	8.49 ( 21.4 )
PNEUMOMEDIASTINUM	RESPIRATORY, THORACIC AND MEDIASTINAL DISORDERS	4	4.12 ( 1.47 - 11.61 )	4.12 ( 8.5 )
HYPERTHERMIA	GENERAL DISORDERS AND ADMINISTRATION SITE CONDITIONS	4	1.37 ( 0.51 - 3.73 )	1.37 ( 0.39 )
HAEMORRHAGIC STROKE	NERVOUS SYSTEM DISORDERS	4	0.94 ( 0.35 - 2.55 )	0.94 ( 0.01 )
ATRIAL FLUTTER	CARDIAC DISORDERS	4	0.7 ( 0.26 - 1.88 )	0.7 ( 0.52 )
DILATATION VENTRICULAR	CARDIAC DISORDERS	4	4.37 ( 1.55 - 12.35 )	4.37 ( 9.29 )
PAPILLOEDEMA	EYE DISORDERS	4	1.72 ( 0.63 - 4.69 )	1.72 ( 1.15 )
UTERINE CANCER	NEOPLASMS BENIGN, MALIGNANT AND UNSPECIFIED (INCL CYSTS AND POLYPS)	4	0.41 ( 0.15 - 1.1 )	0.41 ( 3.38 )
HEPATIC ENCEPHALOPATHY	NERVOUS SYSTEM DISORDERS	4	2.01 ( 0.73 - 5.49 )	2.01 ( 1.91 )
RENAL CANCER	NEOPLASMS BENIGN, MALIGNANT AND UNSPECIFIED (INCL CYSTS AND POLYPS)	4	0.33 ( 0.12 - 0.89 )	0.33 ( 5.26 )
CEREBRAL HAEMORRHAGE	NERVOUS SYSTEM DISORDERS	3	0.15 ( 0.05 - 0.46 )	0.15 ( 14.48 )
ECTOPIC PREGNANCY	PREGNANCY, PUERPERIUM AND PERINATAL CONDITIONS	3	1.87 ( 0.58 - 5.96 )	1.87 ( 1.15 )
INFECTIOUS PLEURAL EFFUSION	INFECTIONS AND INFESTATIONS	3	0.63 ( 0.2 - 1.96 )	0.63 ( 0.66 )
MALIGNANT HYPERTENSION	VASCULAR DISORDERS	3	4.71 ( 1.41 - 15.68 )	4.71 ( 7.75 )
FACIAL PAIN	GENERAL DISORDERS AND ADMINISTRATION SITE CONDITIONS	3	0.23 ( 0.08 - 0.73 )	0.23 ( 7.43 )
LIGAMENT RUPTURE	INJURY, POISONING AND PROCEDURAL COMPLICATIONS	3	0.16 ( 0.05 - 0.5 )	0.16 ( 13.15 )
HYPERGAMMAGLOBULINAEMIA BENIGN MONOCLONAL	NEOPLASMS BENIGN, MALIGNANT AND UNSPECIFIED (INCL CYSTS AND POLYPS)	3	1.44 ( 0.46 - 4.58 )	1.44 ( 0.39 )
SCHIZOPHRENIA	PSYCHIATRIC DISORDERS	3	1.32 ( 0.42 - 4.18 )	1.32 ( 0.23 )
CONJUNCTIVAL HAEMORRHAGE	EYE DISORDERS	3	0.98 ( 0.31 - 3.1 )	0.98 ( 0 )
ULCERATIVE KERATITIS	EYE DISORDERS	3	0.32 ( 0.1 - 1.01 )	0.32 ( 4.21 )
NAIL DYSTROPHY	SKIN AND SUBCUTANEOUS TISSUE DISORDERS	3	13.53 ( 3.59 - 51.02 )	13.53 ( 25.33 )
GINGIVAL PAIN	GASTROINTESTINAL DISORDERS	3	0.25 ( 0.08 - 0.78 )	0.25 ( 6.7 )
GINGIVITIS	INFECTIONS AND INFESTATIONS	3	0.21 ( 0.07 - 0.65 )	0.21 ( 8.96 )
PERSONALITY CHANGE	PSYCHIATRIC DISORDERS	3	1.41 ( 0.44 - 4.46 )	1.41 ( 0.34 )
ENCEPHALITIS BRAIN STEM	INFECTIONS AND INFESTATIONS	3	5.41 ( 1.61 - 18.22 )	5.41 ( 9.39 )
PANIC ATTACK	PSYCHIATRIC DISORDERS	3	0.15 ( 0.05 - 0.46 )	0.15 ( 14.48 )
ACUTE INTERSTITIAL PNEUMONITIS	RESPIRATORY, THORACIC AND MEDIASTINAL DISORDERS	3	2.41 ( 0.75 - 7.74 )	2.41 ( 2.31 )
ACIDOSIS	METABOLISM AND NUTRITION DISORDERS	3	1.72 ( 0.54 - 5.47 )	1.72 ( 0.86 )
BLOOD PH INCREASED	INVESTIGATIONS	3	7.73 ( 2.22 - 26.91 )	7.73 ( 14.49 )
HAIR DISORDER	SKIN AND SUBCUTANEOUS TISSUE DISORDERS	3	1.13 ( 0.36 - 3.56 )	1.13 ( 0.04 )
EYELID PTOSIS	EYE DISORDERS	3	0.45 ( 0.14 - 1.41 )	0.45 ( 1.98 )
VENTRICULAR HYPOKINESIA	CARDIAC DISORDERS	3	1.93 ( 0.61 - 6.18 )	1.93 ( 1.28 )
LACTIC ACIDOSIS	METABOLISM AND NUTRITION DISORDERS	3	0.97 ( 0.31 - 3.04 )	0.97 ( 0 )
ANAEMIA MEGALOBLASTIC	BLOOD AND LYMPHATIC SYSTEM DISORDERS	3	5.41 ( 1.61 - 18.22 )	5.41 ( 9.39 )
BONE MARROW DISORDER	BLOOD AND LYMPHATIC SYSTEM DISORDERS	3	0.81 ( 0.26 - 2.56 )	0.81 ( 0.12 )
INFECTIVE EXACERBATION OF CHRONIC OBSTRUCTIVE AIRWAYS DISEASE	INFECTIONS AND INFESTATIONS	3	1.5 ( 0.47 - 4.77 )	1.5 ( 0.49 )
YELLOW SKIN	SKIN AND SUBCUTANEOUS TISSUE DISORDERS	3	1.18 ( 0.37 - 3.72 )	1.18 ( 0.08 )
FOOD AVERSION	METABOLISM AND NUTRITION DISORDERS	3	4.16 ( 1.26 - 13.76 )	4.16 ( 6.47 )
PHARYNGITIS STREPTOCOCCAL	INFECTIONS AND INFESTATIONS	3	0.08 ( 0.03 - 0.25 )	0.08 ( 31.04 )
CAT SCRATCH DISEASE	INFECTIONS AND INFESTATIONS	3	4.01 ( 1.22 - 13.22 )	4.01 ( 6.1 )
EOSINOPHILIC PNEUMONIA	RESPIRATORY, THORACIC AND MEDIASTINAL DISORDERS	3	1.97 ( 0.62 - 6.29 )	1.97 ( 1.36 )
PROTEUS INFECTION	INFECTIONS AND INFESTATIONS	3	3.49 ( 1.07 - 11.43 )	3.49 ( 4.87 )
WOUND INFECTION STAPHYLOCOCCAL	INFECTIONS AND INFESTATIONS	3	0.46 ( 0.15 - 1.45 )	0.46 ( 1.83 )
BRONCHOPLEURAL FISTULA	RESPIRATORY, THORACIC AND MEDIASTINAL DISORDERS	3	2.71 ( 0.84 - 8.75 )	2.71 ( 3 )
DISEASE COMPLICATION	GENERAL DISORDERS AND ADMINISTRATION SITE CONDITIONS	3	1.19 ( 0.38 - 3.76 )	1.19 ( 0.09 )
SEPTIC ARTHRITIS STAPHYLOCOCCAL	INFECTIONS AND INFESTATIONS	3	0.93 ( 0.3 - 2.94 )	0.93 ( 0.01 )
CHOLANGITIS	HEPATOBILIARY DISORDERS	3	0.63 ( 0.2 - 1.98 )	0.63 ( 0.63 )
SALIVARY HYPERSECRETION	GASTROINTESTINAL DISORDERS	3	1.24 ( 0.39 - 3.93 )	1.24 ( 0.14 )
OVARIAN CYST RUPTURED	REPRODUCTIVE SYSTEM AND BREAST DISORDERS	3	1.59 ( 0.5 - 5.06 )	1.59 ( 0.63 )
ADENOCARCINOMA	NEOPLASMS BENIGN, MALIGNANT AND UNSPECIFIED (INCL CYSTS AND POLYPS)	3	0.69 ( 0.22 - 2.15 )	0.69 ( 0.43 )
DIABETIC NEUROPATHY	NERVOUS SYSTEM DISORDERS	3	0.92 ( 0.29 - 2.89 )	0.92 ( 0.02 )
FINGER AMPUTATION	SURGICAL AND MEDICAL PROCEDURES	3	2.21 ( 0.69 - 7.09 )	2.21 ( 1.87 )
PURULENCE	INFECTIONS AND INFESTATIONS	3	0.56 ( 0.18 - 1.74 )	0.56 ( 1.05 )
ENTEROCOLITIS	GASTROINTESTINAL DISORDERS	3	0.64 ( 0.2 - 1.99 )	0.64 ( 0.61 )
BREAST NEOPLASM	NEOPLASMS BENIGN, MALIGNANT AND UNSPECIFIED (INCL CYSTS AND POLYPS)	3	0.76 ( 0.24 - 2.38 )	0.76 ( 0.23 )
RECTAL CANCER	NEOPLASMS BENIGN, MALIGNANT AND UNSPECIFIED (INCL CYSTS AND POLYPS)	3	0.42 ( 0.14 - 1.33 )	0.42 ( 2.31 )
BLOOD THYROID STIMULATING HORMONE DECREASED	INVESTIGATIONS	3	1.8 ( 0.57 - 5.75 )	1.8 ( 1.02 )
EMOTIONAL DISORDER	PSYCHIATRIC DISORDERS	3	0.16 ( 0.05 - 0.5 )	0.16 ( 13.02 )
VISUAL FIELD DEFECT	EYE DISORDERS	3	0.53 ( 0.17 - 1.65 )	0.53 ( 1.25 )
MADAROSIS	SKIN AND SUBCUTANEOUS TISSUE DISORDERS	3	1.5 ( 0.47 - 4.77 )	1.5 ( 0.49 )
BLOOD BLISTER	SKIN AND SUBCUTANEOUS TISSUE DISORDERS	3	0.47 ( 0.15 - 1.47 )	0.47 ( 1.76 )
TOE AMPUTATION	SURGICAL AND MEDICAL PROCEDURES	3	0.43 ( 0.14 - 1.33 )	0.43 ( 2.29 )
GLOMERULAR FILTRATION RATE DECREASED	INVESTIGATIONS	3	0.5 ( 0.16 - 1.57 )	0.5 ( 1.47 )
THERAPEUTIC PRODUCT EFFECT DELAYED	GENERAL DISORDERS AND ADMINISTRATION SITE CONDITIONS	3	0.4 ( 0.13 - 1.26 )	0.4 ( 2.63 )
IRON DEFICIENCY	METABOLISM AND NUTRITION DISORDERS	3	0.44 ( 0.14 - 1.37 )	0.44 ( 2.13 )
UTERINE DISORDER	REPRODUCTIVE SYSTEM AND BREAST DISORDERS	3	0.44 ( 0.14 - 1.36 )	0.44 ( 2.16 )
HAEMORRHAGIC DISORDER	BLOOD AND LYMPHATIC SYSTEM DISORDERS	3	3.01 ( 0.93 - 9.77 )	3.01 ( 3.71 )
RESPIRATORY TRACT INFECTION VIRAL	INFECTIONS AND INFESTATIONS	3	0.66 ( 0.21 - 2.06 )	0.66 ( 0.53 )
THYROXINE DECREASED	INVESTIGATIONS	3	6.02 ( 1.77 - 20.42 )	6.02 ( 10.75 )
HORMONE LEVEL ABNORMAL	INVESTIGATIONS	3	0.89 ( 0.28 - 2.81 )	0.89 ( 0.04 )
MENOPAUSE	SOCIAL CIRCUMSTANCES	3	0.51 ( 0.16 - 1.6 )	0.51 ( 1.39 )
GASTROINTESTINAL BACTERIAL INFECTION	INFECTIONS AND INFESTATIONS	3	1.14 ( 0.36 - 3.6 )	1.14 ( 0.05 )
CRYSTAL URINE PRESENT	INVESTIGATIONS	3	6.02 ( 1.77 - 20.42 )	6.02 ( 10.75 )
AFFECT LABILITY	PSYCHIATRIC DISORDERS	3	0.71 ( 0.23 - 2.22 )	0.71 ( 0.36 )
BONE MARROW INFILTRATION	BLOOD AND LYMPHATIC SYSTEM DISORDERS	3	27.07 ( 6.06 - 120.95 )	27.07 ( 43.04 )
OSTEOLYSIS	MUSCULOSKELETAL AND CONNECTIVE TISSUE DISORDERS	3	0.92 ( 0.29 - 2.89 )	0.92 ( 0.02 )
PAINFUL RESPIRATION	RESPIRATORY, THORACIC AND MEDIASTINAL DISORDERS	3	0.47 ( 0.15 - 1.46 )	0.47 ( 1.78 )
PSOAS ABSCESS	INFECTIONS AND INFESTATIONS	3	1.55 ( 0.49 - 4.91 )	1.55 ( 0.56 )
SENSORY LOSS	NERVOUS SYSTEM DISORDERS	3	0.31 ( 0.1 - 0.97 )	0.31 ( 4.56 )
STRESS AT WORK	SOCIAL CIRCUMSTANCES	3	0.93 ( 0.29 - 2.91 )	0.93 ( 0.02 )
EYE PRURITUS	EYE DISORDERS	3	0.12 ( 0.04 - 0.39 )	0.12 ( 18.34 )
MEAN CELL HAEMOGLOBIN INCREASED	INVESTIGATIONS	3	1.19 ( 0.38 - 3.76 )	1.19 ( 0.09 )
INTERVERTEBRAL DISC COMPRESSION	MUSCULOSKELETAL AND CONNECTIVE TISSUE DISORDERS	3	0.62 ( 0.2 - 1.95 )	0.62 ( 0.68 )
METAMORPHOPSIA	EYE DISORDERS	3	2.08 ( 0.65 - 6.67 )	2.08 ( 1.6 )
SUPERFICIAL INJURY OF EYE	INJURY, POISONING AND PROCEDURAL COMPLICATIONS	3	1.8 ( 0.57 - 5.75 )	1.8 ( 1.02 )
NASAL ULCER	RESPIRATORY, THORACIC AND MEDIASTINAL DISORDERS	3	0.5 ( 0.16 - 1.56 )	0.5 ( 1.49 )
TONGUE ULCERATION	GASTROINTESTINAL DISORDERS	3	0.4 ( 0.13 - 1.24 )	0.4 ( 2.72 )
HAEMOCHROMATOSIS	METABOLISM AND NUTRITION DISORDERS	3	1.59 ( 0.5 - 5.06 )	1.59 ( 0.63 )
RETINAL DEGENERATION	EYE DISORDERS	3	2.46 ( 0.76 - 7.93 )	2.46 ( 2.44 )
PREMATURE DELIVERY	PREGNANCY, PUERPERIUM AND PERINATAL CONDITIONS	3	0.36 ( 0.12 - 1.14 )	0.36 ( 3.29 )
ANAEMIA OF CHRONIC DISEASE	BLOOD AND LYMPHATIC SYSTEM DISORDERS	3	1.69 ( 0.53 - 5.39 )	1.69 ( 0.81 )
ABDOMINAL SYMPTOM	GASTROINTESTINAL DISORDERS	3	4.01 ( 1.22 - 13.22 )	4.01 ( 6.1 )
AGGRESSION	PSYCHIATRIC DISORDERS	3	0.56 ( 0.18 - 1.75 )	0.56 ( 1.01 )
CRANIAL NERVE INJURY	INJURY, POISONING AND PROCEDURAL COMPLICATIONS	3	27.07 ( 6.06 - 120.95 )	27.07 ( 43.04 )
EXTRAPYRAMIDAL DISORDER	NERVOUS SYSTEM DISORDERS	3	6.02 ( 1.77 - 20.42 )	6.02 ( 10.75 )
HYPERLIPIDAEMIA	METABOLISM AND NUTRITION DISORDERS	3	0.3 ( 0.1 - 0.93 )	0.3 ( 4.94 )
STILLBIRTH	PREGNANCY, PUERPERIUM AND PERINATAL CONDITIONS	3	3.09 ( 0.95 - 10.06 )	3.09 ( 3.91 )
HYPERPLASIA	GENERAL DISORDERS AND ADMINISTRATION SITE CONDITIONS	3	2.41 ( 0.75 - 7.74 )	2.41 ( 2.31 )
LIP DISCOLOURATION	GASTROINTESTINAL DISORDERS	3	3.28 ( 1.01 - 10.7 )	3.28 ( 4.36 )
WEIGHT BEARING DIFFICULTY	MUSCULOSKELETAL AND CONNECTIVE TISSUE DISORDERS	3	0.33 ( 0.1 - 1.02 )	0.33 ( 4.12 )
NECK SURGERY	SURGICAL AND MEDICAL PROCEDURES	3	0.28 ( 0.09 - 0.86 )	0.28 ( 5.6 )
ACUTE GENERALISED EXANTHEMATOUS PUSTULOSIS	SKIN AND SUBCUTANEOUS TISSUE DISORDERS	3	1.75 ( 0.55 - 5.56 )	1.75 ( 0.91 )
CORNEAL SCAR	EYE DISORDERS	3	5.16 ( 1.54 - 17.29 )	5.16 ( 8.79 )
NASAL DISCOMFORT	RESPIRATORY, THORACIC AND MEDIASTINAL DISORDERS	3	0.35 ( 0.11 - 1.08 )	0.35 ( 3.68 )
FOAMING AT MOUTH	GENERAL DISORDERS AND ADMINISTRATION SITE CONDITIONS	3	4.16 ( 1.26 - 13.76 )	4.16 ( 6.47 )
BLOOD IMMUNOGLOBULIN G DECREASED	INVESTIGATIONS	3	1.05 ( 0.33 - 3.31 )	1.05 ( 0.01 )
ADENOCARCINOMA OF COLON	NEOPLASMS BENIGN, MALIGNANT AND UNSPECIFIED (INCL CYSTS AND POLYPS)	3	0.78 ( 0.25 - 2.44 )	0.78 ( 0.18 )
TRACHEOBRONCHITIS	INFECTIONS AND INFESTATIONS	3	1.87 ( 0.58 - 5.96 )	1.87 ( 1.15 )
LUNG CANCER METASTATIC	NEOPLASMS BENIGN, MALIGNANT AND UNSPECIFIED (INCL CYSTS AND POLYPS)	3	0.34 ( 0.11 - 1.07 )	0.34 ( 3.72 )
VARICELLA	INFECTIONS AND INFESTATIONS	3	0.64 ( 0.2 - 2.01 )	0.64 ( 0.59 )
METASTASES TO LUNG	NEOPLASMS BENIGN, MALIGNANT AND UNSPECIFIED (INCL CYSTS AND POLYPS)	3	0.43 ( 0.14 - 1.33 )	0.43 ( 2.29 )
INTRAOCULAR PRESSURE TEST ABNORMAL	INVESTIGATIONS	3	3.87 ( 1.18 - 12.72 )	3.87 ( 5.76 )
IMPAIRED QUALITY OF LIFE	SOCIAL CIRCUMSTANCES	3	0.49 ( 0.16 - 1.54 )	0.49 ( 1.55 )
FISTULA	MUSCULOSKELETAL AND CONNECTIVE TISSUE DISORDERS	3	0.35 ( 0.11 - 1.1 )	0.35 ( 3.55 )
HEPATIC HAEMATOMA	HEPATOBILIARY DISORDERS	3	3.73 ( 1.14 - 12.26 )	3.73 ( 5.44 )
BACTERIURIA	INFECTIONS AND INFESTATIONS	3	4.92 ( 1.47 - 16.44 )	4.92 ( 8.25 )
SKIN EROSION	SKIN AND SUBCUTANEOUS TISSUE DISORDERS	3	0.89 ( 0.28 - 2.81 )	0.89 ( 0.04 )
NEUTROPHILIA	BLOOD AND LYMPHATIC SYSTEM DISORDERS	3	2.12 ( 0.66 - 6.8 )	2.12 ( 1.68 )
HAEMOTHORAX	RESPIRATORY, THORACIC AND MEDIASTINAL DISORDERS	3	1.9 ( 0.59 - 6.07 )	1.9 ( 1.21 )
SMALL FOR DATES BABY	PREGNANCY, PUERPERIUM AND PERINATAL CONDITIONS	3	1.55 ( 0.49 - 4.91 )	1.55 ( 0.56 )
CERVICAL SPINAL STENOSIS	MUSCULOSKELETAL AND CONNECTIVE TISSUE DISORDERS	3	0.69 ( 0.22 - 2.15 )	0.69 ( 0.43 )
EXTRANODAL MARGINAL ZONE B-CELL LYMPHOMA (MALT TYPE)	NEOPLASMS BENIGN, MALIGNANT AND UNSPECIFIED (INCL CYSTS AND POLYPS)	3	0.87 ( 0.28 - 2.74 )	0.87 ( 0.05 )
INGUINAL HERNIA REPAIR	SURGICAL AND MEDICAL PROCEDURES	3	4.92 ( 1.47 - 16.44 )	4.92 ( 8.25 )
JOINT DISLOCATION REDUCTION	SURGICAL AND MEDICAL PROCEDURES	3	9.84 ( 2.75 - 35.28 )	9.84 ( 18.73 )
NASAL CRUSTING	RESPIRATORY, THORACIC AND MEDIASTINAL DISORDERS	3	4.33 ( 1.31 - 14.35 )	4.33 ( 6.86 )
PERINEAL DISORDER	REPRODUCTIVE SYSTEM AND BREAST DISORDERS	3	18.05 ( 4.51 - 72.16 )	18.05 ( 32.2 )
PARAPLEGIA	NERVOUS SYSTEM DISORDERS	3	1.24 ( 0.39 - 3.93 )	1.24 ( 0.14 )
LIP ULCERATION	GASTROINTESTINAL DISORDERS	3	0.98 ( 0.31 - 3.1 )	0.98 ( 0 )
BODY MASS INDEX INCREASED	INVESTIGATIONS	3	3.18 ( 0.98 - 10.37 )	3.18 ( 4.13 )
ENTEROBACTER INFECTION	INFECTIONS AND INFESTATIONS	3	1.93 ( 0.61 - 6.18 )	1.93 ( 1.28 )
ASPARTATE AMINOTRANSFERASE ABNORMAL	INVESTIGATIONS	3	2.52 ( 0.78 - 8.12 )	2.52 ( 2.57 )
INCREASED TENDENCY TO BRUISE	BLOOD AND LYMPHATIC SYSTEM DISORDERS	3	0.09 ( 0.03 - 0.28 )	0.09 ( 27.79 )
PALINDROMIC RHEUMATISM	MUSCULOSKELETAL AND CONNECTIVE TISSUE DISORDERS	3	1.8 ( 0.57 - 5.75 )	1.8 ( 1.02 )
IMMUNE RECONSTITUTION INFLAMMATORY SYNDROME	IMMUNE SYSTEM DISORDERS	3	0.74 ( 0.24 - 2.33 )	0.74 ( 0.26 )
ABDOMINAL ABSCESS	INFECTIONS AND INFESTATIONS	3	0.46 ( 0.15 - 1.44 )	0.46 ( 1.87 )
DIVERTICULAR PERFORATION	GASTROINTESTINAL DISORDERS	3	0.32 ( 0.1 - 1.01 )	0.32 ( 4.21 )
EPISCLERITIS	EYE DISORDERS	3	0.98 ( 0.31 - 3.1 )	0.98 ( 0 )
COLONIC ABSCESS	INFECTIONS AND INFESTATIONS	3	1.26 ( 0.4 - 3.98 )	1.26 ( 0.15 )
OPHTHALMIC HERPES ZOSTER	INFECTIONS AND INFESTATIONS	3	0.48 ( 0.15 - 1.49 )	0.48 ( 1.7 )
GENERALISED ANXIETY DISORDER	PSYCHIATRIC DISORDERS	3	6.37 ( 1.87 - 21.73 )	6.37 ( 11.54 )
EXPOSURE VIA BREAST MILK	INJURY, POISONING AND PROCEDURAL COMPLICATIONS	3	0.85 ( 0.27 - 2.66 )	0.85 ( 0.08 )
FOETAL GROWTH RESTRICTION	PREGNANCY, PUERPERIUM AND PERINATAL CONDITIONS	3	1.53 ( 0.48 - 4.84 )	1.52 ( 0.52 )
ULTRASOUND SCAN ABNORMAL	INVESTIGATIONS	3	6.37 ( 1.87 - 21.73 )	6.37 ( 11.54 )
HTLV-1 CARRIER	INFECTIONS AND INFESTATIONS	3	108.28 ( 11.26 - 1040.99 )	108.27 ( 79.71 )
ROTATOR CUFF REPAIR	SURGICAL AND MEDICAL PROCEDURES	3	0.37 ( 0.12 - 1.16 )	0.37 ( 3.17 )
WOUND DECOMPOSITION	INJURY, POISONING AND PROCEDURAL COMPLICATIONS	3	10.83 ( 2.98 - 39.34 )	10.83 ( 20.58 )
BASOPHIL COUNT INCREASED	INVESTIGATIONS	3	7.73 ( 2.22 - 26.91 )	7.73 ( 14.49 )
EYE ULCER	EYE DISORDERS	3	0.94 ( 0.3 - 2.96 )	0.94 ( 0.01 )
KERATITIS BACTERIAL	INFECTIONS AND INFESTATIONS	3	10.83 ( 2.98 - 39.34 )	10.83 ( 20.58 )
BLOOD ALKALINE PHOSPHATASE ABNORMAL	INVESTIGATIONS	3	12.03 ( 3.26 - 44.44 )	12.03 ( 22.76 )
HAEMOGLOBIN ABNORMAL	INVESTIGATIONS	3	0.72 ( 0.23 - 2.26 )	0.72 ( 0.32 )
PAROTID GLAND ENLARGEMENT	GASTROINTESTINAL DISORDERS	3	2.41 ( 0.75 - 7.74 )	2.41 ( 2.31 )
MILIARIA	SKIN AND SUBCUTANEOUS TISSUE DISORDERS	3	0.98 ( 0.31 - 3.1 )	0.98 ( 0 )
LISTERIOSIS	INFECTIONS AND INFESTATIONS	3	0.98 ( 0.31 - 3.1 )	0.98 ( 0 )
PHARYNGEAL ABSCESS	INFECTIONS AND INFESTATIONS	3	1.87 ( 0.58 - 5.96 )	1.87 ( 1.15 )
FOLATE DEFICIENCY	METABOLISM AND NUTRITION DISORDERS	3	0.83 ( 0.27 - 2.62 )	0.83 ( 0.1 )
PULMONARY SARCOIDOSIS	RESPIRATORY, THORACIC AND MEDIASTINAL DISORDERS	3	0.93 ( 0.29 - 2.91 )	0.93 ( 0.02 )
CRYPTITIS	GASTROINTESTINAL DISORDERS	3	54.14 ( 9.05 - 324.02 )	54.14 ( 62.59 )
ENTERITIS	GASTROINTESTINAL DISORDERS	3	0.69 ( 0.22 - 2.16 )	0.69 ( 0.41 )
BLOOD CREATININE DECREASED	INVESTIGATIONS	3	0.86 ( 0.27 - 2.7 )	0.86 ( 0.07 )
CONGENITAL CYSTIC KIDNEY DISEASE	CONGENITAL, FAMILIAL AND GENETIC DISORDERS	3	5.41 ( 1.61 - 18.22 )	5.41 ( 9.39 )
DEVICE ISSUE	PRODUCT ISSUES	3	0.01 ( 0 - 0.04 )	0.01 ( 205.14 )
ENTEROCOLITIS HAEMORRHAGIC	GASTROINTESTINAL DISORDERS	3	3.73 ( 1.14 - 12.26 )	3.73 ( 5.44 )
CENTRAL NERVOUS SYSTEM INFECTION	INFECTIONS AND INFESTATIONS	3	1.62 ( 0.51 - 5.14 )	1.62 ( 0.67 )
PRIMARY BILIARY CHOLANGITIS	HEPATOBILIARY DISORDERS	3	3.61 ( 1.1 - 11.83 )	3.61 ( 5.14 )
ABDOMINAL RIGIDITY	GASTROINTESTINAL DISORDERS	3	1.48 ( 0.47 - 4.71 )	1.48 ( 0.45 )
INTESTINAL ISCHAEMIA	GASTROINTESTINAL DISORDERS	3	0.54 ( 0.17 - 1.68 )	0.54 ( 1.19 )
ATYPICAL PNEUMONIA	INFECTIONS AND INFESTATIONS	3	0.43 ( 0.14 - 1.35 )	0.43 ( 2.22 )
AORTIC ANEURYSM	VASCULAR DISORDERS	3	0.2 ( 0.06 - 0.62 )	0.2 ( 9.62 )
BREAST PAIN	REPRODUCTIVE SYSTEM AND BREAST DISORDERS	3	0.26 ( 0.08 - 0.82 )	0.26 ( 6.11 )
HUMAN HERPESVIRUS 6 ENCEPHALITIS	INFECTIONS AND INFESTATIONS	3	18.05 ( 4.51 - 72.16 )	18.05 ( 32.2 )
FAECES PALE	GASTROINTESTINAL DISORDERS	3	1.64 ( 0.52 - 5.22 )	1.64 ( 0.72 )
PROSTATOMEGALY	REPRODUCTIVE SYSTEM AND BREAST DISORDERS	3	0.59 ( 0.19 - 1.85 )	0.59 ( 0.83 )
OBSTRUCTIVE PANCREATITIS	GASTROINTESTINAL DISORDERS	3	4.16 ( 1.26 - 13.76 )	4.16 ( 6.47 )
CRYSTAL ARTHROPATHY	MUSCULOSKELETAL AND CONNECTIVE TISSUE DISORDERS	3	3.01 ( 0.93 - 9.77 )	3.01 ( 3.71 )
INFECTIVE EXACERBATION OF BRONCHIECTASIS	INFECTIONS AND INFESTATIONS	3	2.78 ( 0.86 - 8.98 )	2.78 ( 3.17 )
MIDDLE LOBE SYNDROME	RESPIRATORY, THORACIC AND MEDIASTINAL DISORDERS	3	7.73 ( 2.22 - 26.91 )	7.73 ( 14.49 )
RHEUMATOID FACTOR	INVESTIGATIONS	3	2.12 ( 0.66 - 6.8 )	2.12 ( 1.68 )
HUMAN HERPESVIRUS 7 INFECTION	INFECTIONS AND INFESTATIONS	3	21.66 ( 5.18 - 90.62 )	21.65 ( 36.94 )
RECTAL PROLAPSE	GASTROINTESTINAL DISORDERS	3	0.87 ( 0.28 - 2.74 )	0.87 ( 0.05 )
GASTRITIS EROSIVE	GASTROINTESTINAL DISORDERS	3	0.57 ( 0.18 - 1.77 )	0.57 ( 0.98 )
HEAVY MENSTRUAL BLEEDING	REPRODUCTIVE SYSTEM AND BREAST DISORDERS	3	1.09 ( 0.35 - 3.45 )	1.09 ( 0.02 )
AGE-RELATED MACULAR DEGENERATION	EYE DISORDERS	3	1.64 ( 0.52 - 5.22 )	1.64 ( 0.72 )
GENITAL HERPES SIMPLEX	INFECTIONS AND INFESTATIONS	3	6.77 ( 1.97 - 23.23 )	6.77 ( 12.42 )
DIARRHOEA HAEMORRHAGIC	GASTROINTESTINAL DISORDERS	3	0.41 ( 0.13 - 1.29 )	0.41 ( 2.45 )
WEIGHT ABNORMAL	INVESTIGATIONS	3	0.82 ( 0.26 - 2.58 )	0.82 ( 0.12 )
CENTRAL NERVOUS SYSTEM VASCULITIS	NERVOUS SYSTEM DISORDERS	3	4.16 ( 1.26 - 13.76 )	4.16 ( 6.47 )
FEELING OF BODY TEMPERATURE CHANGE	GENERAL DISORDERS AND ADMINISTRATION SITE CONDITIONS	3	0.39 ( 0.13 - 1.22 )	0.39 ( 2.82 )
GINGIVAL RECESSION	GASTROINTESTINAL DISORDERS	3	0.95 ( 0.3 - 2.99 )	0.95 ( 0.01 )
DISABILITY ASSESSMENT SCALE SCORE INCREASED	INVESTIGATIONS	3	0.48 ( 0.15 - 1.51 )	0.48 ( 1.63 )
PUSTULE	INFECTIONS AND INFESTATIONS	3	1.46 ( 0.46 - 4.64 )	1.46 ( 0.42 )
PRODUCT PACKAGE ASSOCIATED INJURY	INJURY, POISONING AND PROCEDURAL COMPLICATIONS	3	36.09 ( 7.28 - 178.83 )	36.09 ( 51.18 )
ACTINOMYCOTIC PULMONARY INFECTION	INFECTIONS AND INFESTATIONS	3	13.53 ( 3.59 - 51.02 )	13.53 ( 25.33 )
TIBIA FRACTURE	INJURY, POISONING AND PROCEDURAL COMPLICATIONS	3	0.18 ( 0.06 - 0.57 )	0.18 ( 10.87 )
THROMBOTIC THROMBOCYTOPENIC PURPURA	BLOOD AND LYMPHATIC SYSTEM DISORDERS	3	2.17 ( 0.68 - 6.94 )	2.17 ( 1.78 )
ILEUS	GASTROINTESTINAL DISORDERS	3	0.48 ( 0.15 - 1.49 )	0.48 ( 1.7 )
TEETH BRITTLE	GASTROINTESTINAL DISORDERS	3	1.9 ( 0.59 - 6.07 )	1.9 ( 1.21 )
MENINGITIS ASEPTIC	INFECTIONS AND INFESTATIONS	3	0.95 ( 0.3 - 2.99 )	0.95 ( 0.01 )
MONOCYTE COUNT INCREASED	INVESTIGATIONS	3	0.56 ( 0.18 - 1.76 )	0.56 ( 1 )
TENOSYNOVITIS STENOSANS	MUSCULOSKELETAL AND CONNECTIVE TISSUE DISORDERS	3	0.8 ( 0.25 - 2.5 )	0.8 ( 0.15 )
SCLERITIS	EYE DISORDERS	3	0.29 ( 0.09 - 0.89 )	0.29 ( 5.29 )
MUSCLE ATROPHY	MUSCULOSKELETAL AND CONNECTIVE TISSUE DISORDERS	3	0.25 ( 0.08 - 0.77 )	0.25 ( 6.81 )
HYPERPHOSPHATAEMIA	METABOLISM AND NUTRITION DISORDERS	3	21.66 ( 5.18 - 90.62 )	21.65 ( 36.94 )
SINUS OPERATION	SURGICAL AND MEDICAL PROCEDURES	3	0.54 ( 0.17 - 1.68 )	0.54 ( 1.19 )
LEUKOENCEPHALOPATHY	NERVOUS SYSTEM DISORDERS	3	0.98 ( 0.31 - 3.1 )	0.98 ( 0 )
LIPIDS INCREASED	INVESTIGATIONS	3	0.9 ( 0.29 - 2.84 )	0.9 ( 0.03 )
BILE DUCT STONE	HEPATOBILIARY DISORDERS	3	0.56 ( 0.18 - 1.75 )	0.56 ( 1.01 )
HUMERUS FRACTURE	INJURY, POISONING AND PROCEDURAL COMPLICATIONS	3	0.22 ( 0.07 - 0.67 )	0.22 ( 8.53 )
CYSTITIS ESCHERICHIA	INFECTIONS AND INFESTATIONS	3	2.21 ( 0.69 - 7.09 )	2.21 ( 1.87 )
BLADDER IRRITATION	RENAL AND URINARY DISORDERS	3	7.22 ( 2.09 - 24.94 )	7.22 ( 13.39 )
HALLUCINATION, VISUAL	PSYCHIATRIC DISORDERS	3	0.77 ( 0.25 - 2.43 )	0.77 ( 0.2 )
BLOOD IMMUNOGLOBULIN A DECREASED	INVESTIGATIONS	3	2.17 ( 0.68 - 6.94 )	2.17 ( 1.78 )
NECROBIOSIS	GENERAL DISORDERS AND ADMINISTRATION SITE CONDITIONS	3	21.66 ( 5.18 - 90.62 )	21.65 ( 36.94 )
ABSCESS SOFT TISSUE	INFECTIONS AND INFESTATIONS	3	4.16 ( 1.26 - 13.76 )	4.16 ( 6.47 )
OESOPHAGEAL PAIN	GASTROINTESTINAL DISORDERS	3	1.09 ( 0.35 - 3.45 )	1.09 ( 0.02 )
ACUTE CORONARY SYNDROME	CARDIAC DISORDERS	3	0.42 ( 0.13 - 1.31 )	0.42 ( 2.36 )
DERMATOMYOSITIS	SKIN AND SUBCUTANEOUS TISSUE DISORDERS	3	0.59 ( 0.19 - 1.86 )	0.59 ( 0.81 )
DERMATITIS ATOPIC	SKIN AND SUBCUTANEOUS TISSUE DISORDERS	3	1.48 ( 0.47 - 4.71 )	1.48 ( 0.45 )
SUPERINFECTION	INFECTIONS AND INFESTATIONS	3	1.34 ( 0.42 - 4.23 )	1.34 ( 0.25 )
CARDIAC FAILURE ACUTE	CARDIAC DISORDERS	3	0.73 ( 0.23 - 2.29 )	0.73 ( 0.29 )
LIP EROSION	GASTROINTESTINAL DISORDERS	3	9.02 ( 2.55 - 31.98 )	9.02 ( 17.12 )
ANGULAR CHEILITIS	GASTROINTESTINAL DISORDERS	3	3.18 ( 0.98 - 10.37 )	3.18 ( 4.13 )
BLINDNESS UNILATERAL	EYE DISORDERS	3	0.18 ( 0.06 - 0.55 )	0.18 ( 11.49 )
SUPRAVENTRICULAR EXTRASYSTOLES	CARDIAC DISORDERS	3	1.39 ( 0.44 - 4.4 )	1.39 ( 0.31 )
CHOLECYSTITIS CHRONIC	HEPATOBILIARY DISORDERS	3	2.08 ( 0.65 - 6.67 )	2.08 ( 1.6 )
SUPRAVENTRICULAR TACHYCARDIA	CARDIAC DISORDERS	3	0.42 ( 0.13 - 1.3 )	0.42 ( 2.4 )
ELECTROCARDIOGRAM ST SEGMENT ABNORMAL	INVESTIGATIONS	3	9.02 ( 2.55 - 31.98 )	9.02 ( 17.12 )
PROTEIN TOTAL INCREASED	INVESTIGATIONS	3	1.22 ( 0.39 - 3.84 )	1.22 ( 0.11 )
VOMITING PROJECTILE	GASTROINTESTINAL DISORDERS	3	2.93 ( 0.9 - 9.49 )	2.93 ( 3.52 )
BLOOD PH DECREASED	INVESTIGATIONS	3	9.02 ( 2.55 - 31.98 )	9.02 ( 17.12 )
UPPER RESPIRATORY TRACT INFLAMMATION	RESPIRATORY, THORACIC AND MEDIASTINAL DISORDERS	3	1.32 ( 0.42 - 4.18 )	1.32 ( 0.23 )
HODGKIN'S DISEASE	NEOPLASMS BENIGN, MALIGNANT AND UNSPECIFIED (INCL CYSTS AND POLYPS)	3	0.23 ( 0.07 - 0.71 )	0.23 ( 7.85 )
HYPOTHERMIA	GENERAL DISORDERS AND ADMINISTRATION SITE CONDITIONS	3	1.44 ( 0.46 - 4.58 )	1.44 ( 0.39 )
HEPATITIS VIRAL	INFECTIONS AND INFESTATIONS	3	6.37 ( 1.87 - 21.73 )	6.37 ( 11.54 )
DYSAESTHESIA	NERVOUS SYSTEM DISORDERS	3	1.55 ( 0.49 - 4.91 )	1.55 ( 0.56 )
ANTINEUTROPHIL CYTOPLASMIC ANTIBODY POSITIVE	INVESTIGATIONS	3	2.78 ( 0.86 - 8.98 )	2.78 ( 3.17 )
HAEMOGLOBIN INCREASED	INVESTIGATIONS	3	1.29 ( 0.41 - 4.08 )	1.29 ( 0.19 )
KLEBSIELLA INFECTION	INFECTIONS AND INFESTATIONS	3	0.77 ( 0.24 - 2.41 )	0.77 ( 0.21 )
BIOPSY SKIN ABNORMAL	INVESTIGATIONS	3	9.02 ( 2.55 - 31.98 )	9.02 ( 17.12 )
HODGKIN'S DISEASE STAGE III	NEOPLASMS BENIGN, MALIGNANT AND UNSPECIFIED (INCL CYSTS AND POLYPS)	3	10.83 ( 2.98 - 39.34 )	10.83 ( 20.58 )
ACUTE PULMONARY OEDEMA	RESPIRATORY, THORACIC AND MEDIASTINAL DISORDERS	3	0.89 ( 0.28 - 2.79 )	0.89 ( 0.04 )
RESTLESSNESS	PSYCHIATRIC DISORDERS	3	0.26 ( 0.08 - 0.81 )	0.26 ( 6.31 )
HYPOVOLAEMIC SHOCK	VASCULAR DISORDERS	3	1.53 ( 0.48 - 4.84 )	1.52 ( 0.52 )
MYDRIASIS	EYE DISORDERS	3	2.12 ( 0.66 - 6.8 )	2.12 ( 1.68 )
DYSPNOEA AT REST	RESPIRATORY, THORACIC AND MEDIASTINAL DISORDERS	3	2.71 ( 0.84 - 8.75 )	2.71 ( 3 )
SUBCUTANEOUS EMPHYSEMA	SKIN AND SUBCUTANEOUS TISSUE DISORDERS	3	2.26 ( 0.7 - 7.24 )	2.26 ( 1.97 )
PNEUMONIA FUNGAL	INFECTIONS AND INFESTATIONS	3	0.89 ( 0.28 - 2.79 )	0.89 ( 0.04 )
TACHYARRHYTHMIA	CARDIAC DISORDERS	3	0.97 ( 0.31 - 3.04 )	0.97 ( 0 )
ORTHOPNOEA	RESPIRATORY, THORACIC AND MEDIASTINAL DISORDERS	3	1.59 ( 0.5 - 5.06 )	1.59 ( 0.63 )
SERUM FERRITIN INCREASED	INVESTIGATIONS	3	1.32 ( 0.42 - 4.18 )	1.32 ( 0.23 )
AMYLOIDOSIS	IMMUNE SYSTEM DISORDERS	3	1.08 ( 0.34 - 3.41 )	1.08 ( 0.02 )
HAEMORRHAGE INTRACRANIAL	NERVOUS SYSTEM DISORDERS	3	0.98 ( 0.31 - 3.1 )	0.98 ( 0 )
AMMONIA INCREASED	INVESTIGATIONS	3	3.49 ( 1.07 - 11.43 )	3.49 ( 4.87 )
BLADDER CANCER	NEOPLASMS BENIGN, MALIGNANT AND UNSPECIFIED (INCL CYSTS AND POLYPS)	3	0.16 ( 0.05 - 0.5 )	0.16 ( 13.1 )
CERVIX CARCINOMA	NEOPLASMS BENIGN, MALIGNANT AND UNSPECIFIED (INCL CYSTS AND POLYPS)	3	0.43 ( 0.14 - 1.34 )	0.43 ( 2.24 )
JUGULAR VEIN DISTENSION	VASCULAR DISORDERS	3	15.47 ( 4 - 59.82 )	15.47 ( 28.42 )
LEFT ATRIAL DILATATION	CARDIAC DISORDERS	3	3.61 ( 1.1 - 11.83 )	3.61 ( 5.14 )
NORMAL PRESSURE HYDROCEPHALUS	NERVOUS SYSTEM DISORDERS	3	4.01 ( 1.22 - 13.22 )	4.01 ( 6.1 )
DIABETIC FOOT	SKIN AND SUBCUTANEOUS TISSUE DISORDERS	3	0.95 ( 0.3 - 2.99 )	0.95 ( 0.01 )
AMYLASE INCREASED	INVESTIGATIONS	3	3.87 ( 1.18 - 12.72 )	3.87 ( 5.76 )
CARDIAC TAMPONADE	CARDIAC DISORDERS	2	0.62 ( 0.15 - 2.52 )	0.62 ( 0.45 )
EFFUSION	GENERAL DISORDERS AND ADMINISTRATION SITE CONDITIONS	2	0.67 ( 0.17 - 2.73 )	0.67 ( 0.31 )
HAEMODYNAMIC INSTABILITY	VASCULAR DISORDERS	2	1.05 ( 0.26 - 4.27 )	1.05 ( 0 )
HYPERGAMMAGLOBULINAEMIA	BLOOD AND LYMPHATIC SYSTEM DISORDERS	2	1.9 ( 0.46 - 7.87 )	1.9 ( 0.81 )
HAEMANGIOMA OF LIVER	NEOPLASMS BENIGN, MALIGNANT AND UNSPECIFIED (INCL CYSTS AND POLYPS)	2	1.31 ( 0.32 - 5.38 )	1.31 ( 0.14 )
FOETAL EXPOSURE TIMING UNSPECIFIED	INJURY, POISONING AND PROCEDURAL COMPLICATIONS	2	Inf ( NaN - Inf )	Inf ( 72.18 )
CEREBELLAR SYNDROME	NERVOUS SYSTEM DISORDERS	2	2.89 ( 0.68 - 12.19 )	2.89 ( 2.28 )
SACCADIC EYE MOVEMENT	NERVOUS SYSTEM DISORDERS	2	72.18 ( 6.55 - 796.11 )	72.18 ( 46.8 )
PNEUMOCYSTIS JIROVECII INFECTION	INFECTIONS AND INFESTATIONS	2	1.06 ( 0.26 - 4.33 )	1.06 ( 0.01 )
DECUBITUS ULCER	SKIN AND SUBCUTANEOUS TISSUE DISORDERS	2	0.16 ( 0.04 - 0.66 )	0.16 ( 8.48 )
BRAIN NATRIURETIC PEPTIDE INCREASED	INVESTIGATIONS	2	1.8 ( 0.44 - 7.47 )	1.8 ( 0.68 )
NIKOLSKY'S SIGN	SKIN AND SUBCUTANEOUS TISSUE DISORDERS	2	24.06 ( 4.02 - 144.01 )	24.06 ( 26.52 )
POST INFLAMMATORY PIGMENTATION CHANGE	SKIN AND SUBCUTANEOUS TISSUE DISORDERS	2	4.25 ( 0.98 - 18.38 )	4.25 ( 4.44 )
DEAFNESS UNILATERAL	EAR AND LABYRINTH DISORDERS	2	0.21 ( 0.05 - 0.84 )	0.21 ( 5.94 )
ARTERIAL STENOSIS	VASCULAR DISORDERS	2	2.01 ( 0.48 - 8.33 )	2.01 ( 0.95 )
NORMAL NEWBORN	PREGNANCY, PUERPERIUM AND PERINATAL CONDITIONS	2	0.82 ( 0.2 - 3.33 )	0.82 ( 0.08 )
VAGINAL INFECTION	INFECTIONS AND INFESTATIONS	2	0.17 ( 0.04 - 0.66 )	0.17 ( 8.4 )
MACROCYTOSIS	BLOOD AND LYMPHATIC SYSTEM DISORDERS	2	0.74 ( 0.18 - 3.02 )	0.74 ( 0.17 )
EYE DISCHARGE	EYE DISORDERS	2	0.19 ( 0.05 - 0.78 )	0.19 ( 6.66 )
GRANULOCYTOPENIA	BLOOD AND LYMPHATIC SYSTEM DISORDERS	2	1.54 ( 0.37 - 6.32 )	1.54 ( 0.36 )
SPONDYLOLISTHESIS	MUSCULOSKELETAL AND CONNECTIVE TISSUE DISORDERS	2	0.31 ( 0.08 - 1.25 )	0.31 ( 3.02 )
HEPATITIS A	INFECTIONS AND INFESTATIONS	2	1.27 ( 0.31 - 5.19 )	1.27 ( 0.11 )
LACRIMATION INCREASED	EYE DISORDERS	2	0.08 ( 0.02 - 0.3 )	0.08 ( 22.38 )
CONDUCTION DISORDER	CARDIAC DISORDERS	2	4.01 ( 0.93 - 17.28 )	4.01 ( 4.07 )
STATUS EPILEPTICUS	NERVOUS SYSTEM DISORDERS	2	2.19 ( 0.52 - 9.12 )	2.19 ( 1.22 )
PERIPHERAL ARTERIAL OCCLUSIVE DISEASE	VASCULAR DISORDERS	2	0.28 ( 0.07 - 1.13 )	0.28 ( 3.65 )
RENAL FUNCTION TEST ABNORMAL	INVESTIGATIONS	2	0.25 ( 0.06 - 1.01 )	0.25 ( 4.45 )
BLADDER NEOPLASM	NEOPLASMS BENIGN, MALIGNANT AND UNSPECIFIED (INCL CYSTS AND POLYPS)	2	0.38 ( 0.09 - 1.54 )	0.38 ( 1.98 )
ACUTE MOTOR-SENSORY AXONAL NEUROPATHY	NERVOUS SYSTEM DISORDERS	2	24.06 ( 4.02 - 144.01 )	24.06 ( 26.52 )
RENAL TUBULAR NECROSIS	RENAL AND URINARY DISORDERS	2	0.78 ( 0.19 - 3.15 )	0.78 ( 0.13 )
PULMONARY NECROSIS	RESPIRATORY, THORACIC AND MEDIASTINAL DISORDERS	2	6.02 ( 1.35 - 26.88 )	6.02 ( 7.17 )
PULMONARY VASCULITIS	RESPIRATORY, THORACIC AND MEDIASTINAL DISORDERS	2	5.55 ( 1.25 - 24.61 )	5.55 ( 6.47 )
PRE-ECLAMPSIA	PREGNANCY, PUERPERIUM AND PERINATAL CONDITIONS	2	0.5 ( 0.12 - 2.01 )	0.5 ( 1 )
SEBORRHOEIC KERATOSIS	NEOPLASMS BENIGN, MALIGNANT AND UNSPECIFIED (INCL CYSTS AND POLYPS)	2	0.93 ( 0.23 - 3.77 )	0.93 ( 0.01 )
PULMONARY VENO-OCCLUSIVE DISEASE	RESPIRATORY, THORACIC AND MEDIASTINAL DISORDERS	2	24.06 ( 4.02 - 144.01 )	24.06 ( 26.52 )
STREPTOCOCCAL INFECTION	INFECTIONS AND INFESTATIONS	2	0.18 ( 0.04 - 0.7 )	0.18 ( 7.7 )
ALLERGIC SINUSITIS	RESPIRATORY, THORACIC AND MEDIASTINAL DISORDERS	2	0.75 ( 0.19 - 3.05 )	0.75 ( 0.16 )
EYE ABSCESS	INFECTIONS AND INFESTATIONS	2	3.01 ( 0.71 - 12.73 )	3.01 ( 2.47 )
NON-CARDIAC CHEST PAIN	GENERAL DISORDERS AND ADMINISTRATION SITE CONDITIONS	2	0.53 ( 0.13 - 2.16 )	0.53 ( 0.8 )
THROMBOPHLEBITIS	VASCULAR DISORDERS	2	0.36 ( 0.09 - 1.45 )	0.36 ( 2.27 )
SKIN INJURY	INJURY, POISONING AND PROCEDURAL COMPLICATIONS	2	0.35 ( 0.09 - 1.41 )	0.35 ( 2.39 )
LIMB MASS	MUSCULOSKELETAL AND CONNECTIVE TISSUE DISORDERS	2	0.16 ( 0.04 - 0.64 )	0.16 ( 8.86 )
GASTROINTESTINAL EROSION	GASTROINTESTINAL DISORDERS	2	4.51 ( 1.04 - 19.62 )	4.51 ( 4.86 )
ORTHOSIS USER	SOCIAL CIRCUMSTANCES	2	1.57 ( 0.38 - 6.46 )	1.57 ( 0.4 )
ANTIPHOSPHOLIPID SYNDROME	BLOOD AND LYMPHATIC SYSTEM DISORDERS	2	0.78 ( 0.19 - 3.15 )	0.78 ( 0.13 )
CAUDAL REGRESSION SYNDROME	CONGENITAL, FAMILIAL AND GENETIC DISORDERS	2	18.05 ( 3.31 - 98.53 )	18.05 ( 21.47 )
JOINT INSTABILITY	MUSCULOSKELETAL AND CONNECTIVE TISSUE DISORDERS	2	0.24 ( 0.06 - 0.97 )	0.24 ( 4.74 )
EXTRADURAL ABSCESS	INFECTIONS AND INFESTATIONS	2	0.62 ( 0.15 - 2.52 )	0.62 ( 0.45 )
NAIL HYPERTROPHY	SKIN AND SUBCUTANEOUS TISSUE DISORDERS	2	6.56 ( 1.45 - 29.61 )	6.56 ( 7.98 )
XEROPHTHALMIA	EYE DISORDERS	2	3.61 ( 0.84 - 15.44 )	3.61 ( 3.43 )
MUSCLE TONE DISORDER	NERVOUS SYSTEM DISORDERS	2	36.09 ( 5.08 - 256.23 )	36.09 ( 34.12 )
GASTROINTESTINAL INFLAMMATION	GASTROINTESTINAL DISORDERS	2	0.23 ( 0.06 - 0.94 )	0.23 ( 4.97 )
TENDON PAIN	MUSCULOSKELETAL AND CONNECTIVE TISSUE DISORDERS	2	0.33 ( 0.08 - 1.34 )	0.33 ( 2.63 )
PHARYNGEAL SWELLING	RESPIRATORY, THORACIC AND MEDIASTINAL DISORDERS	2	0.26 ( 0.06 - 1.05 )	0.26 ( 4.17 )
WOUND DRAINAGE	SURGICAL AND MEDICAL PROCEDURES	2	0.7 ( 0.17 - 2.84 )	0.7 ( 0.25 )
MASTOID ABSCESS	INFECTIONS AND INFESTATIONS	2	Inf ( NaN - Inf )	Inf ( 72.18 )
BLASTOMYCOSIS	INFECTIONS AND INFESTATIONS	2	3.28 ( 0.77 - 13.95 )	3.28 ( 2.91 )
CORONARY ARTERY OCCLUSION	CARDIAC DISORDERS	2	0.06 ( 0.02 - 0.25 )	0.06 ( 27.78 )
ASPARTATE AMINOTRANSFERASE	INVESTIGATIONS	2	6.56 ( 1.45 - 29.61 )	6.56 ( 7.98 )
KYPHOSIS	MUSCULOSKELETAL AND CONNECTIVE TISSUE DISORDERS	2	0.74 ( 0.18 - 2.99 )	0.74 ( 0.18 )
MULTIPLE SCLEROSIS	NERVOUS SYSTEM DISORDERS	2	0.12 ( 0.03 - 0.49 )	0.12 ( 12.5 )
PULMONARY FUNCTION TEST DECREASED	INVESTIGATIONS	2	0.73 ( 0.18 - 2.96 )	0.73 ( 0.2 )
RETINAL DEPOSITS	EYE DISORDERS	2	1.76 ( 0.43 - 7.28 )	1.76 ( 0.63 )
UTERINE HAEMORRHAGE	REPRODUCTIVE SYSTEM AND BREAST DISORDERS	2	0.43 ( 0.11 - 1.74 )	0.43 ( 1.47 )
JOINT ANKYLOSIS	MUSCULOSKELETAL AND CONNECTIVE TISSUE DISORDERS	2	0.54 ( 0.13 - 2.18 )	0.54 ( 0.78 )
BIOPSY LUNG ABNORMAL	INVESTIGATIONS	2	10.31 ( 2.14 - 49.64 )	10.31 ( 13.08 )
RESPIRATORY RATE INCREASED	INVESTIGATIONS	2	0.14 ( 0.04 - 0.57 )	0.14 ( 10.24 )
INCORRECT DOSAGE ADMINISTERED	INJURY, POISONING AND PROCEDURAL COMPLICATIONS	2	0.51 ( 0.13 - 2.07 )	0.51 ( 0.92 )
EXPOSURE TO COMMUNICABLE DISEASE	INJURY, POISONING AND PROCEDURAL COMPLICATIONS	2	0.51 ( 0.13 - 2.07 )	0.51 ( 0.92 )
STOMA COMPLICATION	INJURY, POISONING AND PROCEDURAL COMPLICATIONS	2	5.55 ( 1.25 - 24.61 )	5.55 ( 6.47 )
BLADDER DISORDER	RENAL AND URINARY DISORDERS	2	0.16 ( 0.04 - 0.63 )	0.16 ( 8.99 )
LABYRINTHITIS	INFECTIONS AND INFESTATIONS	2	0.23 ( 0.06 - 0.93 )	0.23 ( 5.05 )
RENAL HAEMORRHAGE	RENAL AND URINARY DISORDERS	2	1.15 ( 0.28 - 4.68 )	1.15 ( 0.04 )
INTERVERTEBRAL DISC OPERATION	SURGICAL AND MEDICAL PROCEDURES	2	0.37 ( 0.09 - 1.49 )	0.37 ( 2.12 )
AORTIC BRUIT	INVESTIGATIONS	2	4.01 ( 0.93 - 17.28 )	4.01 ( 4.07 )
ELBOW OPERATION	SURGICAL AND MEDICAL PROCEDURES	2	0.38 ( 0.09 - 1.51 )	0.38 ( 2.05 )
TRANSFUSION	SURGICAL AND MEDICAL PROCEDURES	2	0.36 ( 0.09 - 1.44 )	0.36 ( 2.29 )
INGUINAL HERNIA	GASTROINTESTINAL DISORDERS	2	0.14 ( 0.03 - 0.56 )	0.14 ( 10.51 )
LOW DENSITY LIPOPROTEIN INCREASED	INVESTIGATIONS	2	0.34 ( 0.08 - 1.36 )	0.34 ( 2.56 )
ZINC DEFICIENCY	METABOLISM AND NUTRITION DISORDERS	2	72.18 ( 6.55 - 796.11 )	72.18 ( 46.8 )
BREECH PRESENTATION	PREGNANCY, PUERPERIUM AND PERINATAL CONDITIONS	2	2.41 ( 0.58 - 10.07 )	2.41 ( 1.54 )
JOINT SURGERY	SURGICAL AND MEDICAL PROCEDURES	2	0.49 ( 0.12 - 1.97 )	0.49 ( 1.06 )
CHRONIC SINUSITIS	INFECTIONS AND INFESTATIONS	2	0.19 ( 0.05 - 0.76 )	0.19 ( 6.93 )
TONGUE COATED	GASTROINTESTINAL DISORDERS	2	1.13 ( 0.28 - 4.61 )	1.13 ( 0.03 )
SPINAL DEFORMITY	MUSCULOSKELETAL AND CONNECTIVE TISSUE DISORDERS	2	0.4 ( 0.1 - 1.62 )	0.4 ( 1.75 )
HYPERFERRITINAEMIA	METABOLISM AND NUTRITION DISORDERS	2	7.22 ( 1.58 - 32.95 )	7.22 ( 8.93 )
IMMUNOGLOBULINS DECREASED	INVESTIGATIONS	2	1.03 ( 0.25 - 4.21 )	1.03 ( 0 )
COMPRESSION FRACTURE	INJURY, POISONING AND PROCEDURAL COMPLICATIONS	2	0.29 ( 0.07 - 1.17 )	0.29 ( 3.43 )
TACHYPHYLAXIS	GENERAL DISORDERS AND ADMINISTRATION SITE CONDITIONS	2	2.89 ( 0.68 - 12.19 )	2.89 ( 2.28 )
CRYPTOCOCCOSIS	INFECTIONS AND INFESTATIONS	2	0.83 ( 0.2 - 3.37 )	0.83 ( 0.07 )
JOINT FLUID DRAINAGE	SURGICAL AND MEDICAL PROCEDURES	2	0.56 ( 0.14 - 2.26 )	0.56 ( 0.68 )
LARGE INTESTINAL OBSTRUCTION	GASTROINTESTINAL DISORDERS	2	0.71 ( 0.18 - 2.9 )	0.71 ( 0.22 )
THROAT CANCER	NEOPLASMS BENIGN, MALIGNANT AND UNSPECIFIED (INCL CYSTS AND POLYPS)	2	0.44 ( 0.11 - 1.77 )	0.44 ( 1.41 )
BILIARY OBSTRUCTION	HEPATOBILIARY DISORDERS	2	1.64 ( 0.4 - 6.77 )	1.64 ( 0.48 )
ANTEROGRADE AMNESIA	NERVOUS SYSTEM DISORDERS	2	14.44 ( 2.8 - 74.42 )	14.44 ( 17.87 )
ATROPHIC VULVOVAGINITIS	REPRODUCTIVE SYSTEM AND BREAST DISORDERS	2	4.51 ( 1.04 - 19.62 )	4.51 ( 4.86 )
CAROTID ARTERY DISEASE	NERVOUS SYSTEM DISORDERS	2	0.95 ( 0.23 - 3.87 )	0.95 ( 0.01 )
CAROTID ARTERY OCCLUSION	NERVOUS SYSTEM DISORDERS	2	0.29 ( 0.07 - 1.17 )	0.29 ( 3.43 )
MYOPIA	EYE DISORDERS	2	1.05 ( 0.26 - 4.27 )	1.05 ( 0 )
PRESBYOPIA	EYE DISORDERS	2	3.61 ( 0.84 - 15.44 )	3.61 ( 3.43 )
URINARY HESITATION	RENAL AND URINARY DISORDERS	2	1.8 ( 0.44 - 7.47 )	1.8 ( 0.68 )
POSTPARTUM HAEMORRHAGE	PREGNANCY, PUERPERIUM AND PERINATAL CONDITIONS	2	2.67 ( 0.64 - 11.24 )	2.67 ( 1.95 )
GLUTEN SENSITIVITY	METABOLISM AND NUTRITION DISORDERS	2	1.57 ( 0.38 - 6.46 )	1.57 ( 0.4 )
BENIGN PROSTATIC HYPERPLASIA	REPRODUCTIVE SYSTEM AND BREAST DISORDERS	2	0.44 ( 0.11 - 1.76 )	0.44 ( 1.43 )
HLA-B*27 POSITIVE	INVESTIGATIONS	2	8.02 ( 1.73 - 37.12 )	8.02 ( 10.06 )
SEXUALLY TRANSMITTED DISEASE	INFECTIONS AND INFESTATIONS	2	4.81 ( 1.1 - 21.04 )	4.81 ( 5.33 )
HYPOPYON	INFECTIONS AND INFESTATIONS	2	4.81 ( 1.1 - 21.04 )	4.81 ( 5.33 )
MALIGNANT NEOPLASM OF CONJUNCTIVA	NEOPLASMS BENIGN, MALIGNANT AND UNSPECIFIED (INCL CYSTS AND POLYPS)	2	4.81 ( 1.1 - 21.04 )	4.81 ( 5.33 )
ECTROPION	EYE DISORDERS	2	14.44 ( 2.8 - 74.42 )	14.44 ( 17.87 )
CARDIAC FLUTTER	CARDIAC DISORDERS	2	0.36 ( 0.09 - 1.46 )	0.36 ( 2.22 )
PYOPNEUMOTHORAX	INFECTIONS AND INFESTATIONS	2	4.25 ( 0.98 - 18.38 )	4.25 ( 4.44 )
INTERNAL HAEMORRHAGE	VASCULAR DISORDERS	2	0.19 ( 0.05 - 0.78 )	0.19 ( 6.66 )
BLOOD LACTIC ACID INCREASED	INVESTIGATIONS	2	1.5 ( 0.37 - 6.19 )	1.5 ( 0.32 )
SPUTUM PURULENT	INFECTIONS AND INFESTATIONS	2	2.06 ( 0.5 - 8.58 )	2.06 ( 1.04 )
TENDON OPERATION	SURGICAL AND MEDICAL PROCEDURES	2	0.57 ( 0.14 - 2.32 )	0.57 ( 0.63 )
NEPHROPATHY TOXIC	RENAL AND URINARY DISORDERS	2	0.83 ( 0.2 - 3.37 )	0.83 ( 0.07 )
HERPES SIMPLEX OESOPHAGITIS	INFECTIONS AND INFESTATIONS	2	2.58 ( 0.61 - 10.82 )	2.58 ( 1.8 )
PLASMA CELL MYELOMA	NEOPLASMS BENIGN, MALIGNANT AND UNSPECIFIED (INCL CYSTS AND POLYPS)	2	0.23 ( 0.06 - 0.91 )	0.23 ( 5.23 )
DIFFUSE LARGE B-CELL LYMPHOMA STAGE II	NEOPLASMS BENIGN, MALIGNANT AND UNSPECIFIED (INCL CYSTS AND POLYPS)	2	5.16 ( 1.17 - 22.69 )	5.16 ( 5.86 )
BLOOD BILIRUBIN UNCONJUGATED INCREASED	INVESTIGATIONS	2	14.44 ( 2.8 - 74.42 )	14.44 ( 17.87 )
BLOOD POTASSIUM ABNORMAL	INVESTIGATIONS	2	0.98 ( 0.24 - 3.97 )	0.98 ( 0 )
PLATELET DISORDER	BLOOD AND LYMPHATIC SYSTEM DISORDERS	2	1.11 ( 0.27 - 4.54 )	1.11 ( 0.02 )
RECTAL ADENOCARCINOMA	NEOPLASMS BENIGN, MALIGNANT AND UNSPECIFIED (INCL CYSTS AND POLYPS)	2	1.36 ( 0.33 - 5.59 )	1.36 ( 0.19 )
AORTIC VALVE SCLEROSIS	CARDIAC DISORDERS	2	3.01 ( 0.71 - 12.73 )	3.01 ( 2.47 )
BREAST FEEDING	SOCIAL CIRCUMSTANCES	2	1.18 ( 0.29 - 4.84 )	1.18 ( 0.06 )
BILE DUCT STENOSIS	HEPATOBILIARY DISORDERS	2	2.78 ( 0.66 - 11.7 )	2.78 ( 2.11 )
HAEMODILUTION	INJURY, POISONING AND PROCEDURAL COMPLICATIONS	2	5.16 ( 1.17 - 22.69 )	5.16 ( 5.86 )
THALASSAEMIA	CONGENITAL, FAMILIAL AND GENETIC DISORDERS	2	4.01 ( 0.93 - 17.28 )	4.01 ( 4.07 )
TONGUE OEDEMA	GASTROINTESTINAL DISORDERS	2	1.42 ( 0.34 - 5.81 )	1.42 ( 0.23 )
FAECES SOFT	GASTROINTESTINAL DISORDERS	2	0.47 ( 0.12 - 1.92 )	0.47 ( 1.15 )
PRODUCT STORAGE ERROR	INJURY, POISONING AND PROCEDURAL COMPLICATIONS	2	0.03 ( 0.01 - 0.12 )	0.03 ( 60.55 )
COLON CANCER METASTATIC	NEOPLASMS BENIGN, MALIGNANT AND UNSPECIFIED (INCL CYSTS AND POLYPS)	2	0.72 ( 0.18 - 2.93 )	0.72 ( 0.21 )
EXPOSED BONE IN JAW	MUSCULOSKELETAL AND CONNECTIVE TISSUE DISORDERS	2	2.26 ( 0.54 - 9.41 )	2.26 ( 1.32 )
PERIPHERAL ARTERY OCCLUSION	VASCULAR DISORDERS	2	0.53 ( 0.13 - 2.16 )	0.53 ( 0.8 )
SINGLE FUNCTIONAL KIDNEY	RENAL AND URINARY DISORDERS	2	1.85 ( 0.45 - 7.67 )	1.85 ( 0.74 )
MICTURITION DISORDER	RENAL AND URINARY DISORDERS	2	0.6 ( 0.15 - 2.43 )	0.6 ( 0.52 )
NEONATAL RESPIRATORY DISTRESS SYNDROME	RESPIRATORY, THORACIC AND MEDIASTINAL DISORDERS	2	7.22 ( 1.58 - 32.95 )	7.22 ( 8.93 )
INJECTION SITE URTICARIA	GENERAL DISORDERS AND ADMINISTRATION SITE CONDITIONS	2	0.02 ( 0 - 0.07 )	0.02 ( 111.88 )
ADENOCARCINOMA GASTRIC	NEOPLASMS BENIGN, MALIGNANT AND UNSPECIFIED (INCL CYSTS AND POLYPS)	2	1.39 ( 0.34 - 5.7 )	1.39 ( 0.21 )
NEOVASCULARISATION	VASCULAR DISORDERS	2	12.03 ( 2.43 - 59.61 )	12.03 ( 15.17 )
BIOPSY LIVER ABNORMAL	INVESTIGATIONS	2	10.31 ( 2.14 - 49.64 )	10.31 ( 13.08 )
VOCAL CORD PARALYSIS	NERVOUS SYSTEM DISORDERS	2	0.82 ( 0.2 - 3.33 )	0.82 ( 0.08 )
BRONCHIOLITIS	INFECTIONS AND INFESTATIONS	2	0.58 ( 0.14 - 2.33 )	0.58 ( 0.61 )
CARDITIS	CARDIAC DISORDERS	2	1.76 ( 0.43 - 7.28 )	1.76 ( 0.63 )
HEPATITIS B CORE ANTIBODY POSITIVE	INVESTIGATIONS	2	1.72 ( 0.42 - 7.1 )	1.72 ( 0.57 )
FEMORAL NECK FRACTURE	INJURY, POISONING AND PROCEDURAL COMPLICATIONS	2	0.22 ( 0.05 - 0.89 )	0.22 ( 5.47 )
SINGLE UMBILICAL ARTERY	CONGENITAL, FAMILIAL AND GENETIC DISORDERS	2	36.09 ( 5.08 - 256.23 )	36.09 ( 34.12 )
OVERWORK	SOCIAL CIRCUMSTANCES	2	6.56 ( 1.45 - 29.61 )	6.56 ( 7.98 )
NEUROPATHIC ARTHROPATHY	MUSCULOSKELETAL AND CONNECTIVE TISSUE DISORDERS	2	2.01 ( 0.48 - 8.33 )	2.01 ( 0.95 )
ANTINUCLEAR ANTIBODY INCREASED	INVESTIGATIONS	2	0.81 ( 0.2 - 3.29 )	0.81 ( 0.09 )
SECONDARY IMMUNODEFICIENCY	IMMUNE SYSTEM DISORDERS	2	1.85 ( 0.45 - 7.67 )	1.85 ( 0.74 )
STENOSIS	GENERAL DISORDERS AND ADMINISTRATION SITE CONDITIONS	2	0.79 ( 0.2 - 3.22 )	0.79 ( 0.11 )
AXONAL NEUROPATHY	NERVOUS SYSTEM DISORDERS	2	1.95 ( 0.47 - 8.09 )	1.95 ( 0.88 )
SKIN ODOUR ABNORMAL	SKIN AND SUBCUTANEOUS TISSUE DISORDERS	2	0.69 ( 0.17 - 2.81 )	0.69 ( 0.26 )
SINUS PAIN	RESPIRATORY, THORACIC AND MEDIASTINAL DISORDERS	2	0.45 ( 0.11 - 1.82 )	0.45 ( 1.32 )
RETINOPATHY HYPERTENSIVE	EYE DISORDERS	2	9.02 ( 1.92 - 42.49 )	9.02 ( 11.41 )
CERVICAL VERTEBRAL FRACTURE	INJURY, POISONING AND PROCEDURAL COMPLICATIONS	2	0.27 ( 0.07 - 1.09 )	0.27 ( 3.88 )
ESCHERICHIA SEPSIS	INFECTIONS AND INFESTATIONS	2	0.5 ( 0.12 - 2.01 )	0.5 ( 1 )
HAEMATOCRIT ABNORMAL	INVESTIGATIONS	2	2.78 ( 0.66 - 11.7 )	2.78 ( 2.11 )
INFARCTION	VASCULAR DISORDERS	2	0.15 ( 0.04 - 0.59 )	0.15 ( 9.75 )
EYE INFECTION	INFECTIONS AND INFESTATIONS	2	0.05 ( 0.01 - 0.22 )	0.05 ( 33.23 )
DECREASED VIBRATORY SENSE	NERVOUS SYSTEM DISORDERS	2	72.18 ( 6.55 - 796.11 )	72.18 ( 46.8 )
DRUG SPECIFIC ANTIBODY	INVESTIGATIONS	2	0.8 ( 0.2 - 3.26 )	0.8 ( 0.1 )
LARYNGEAL SQUAMOUS CELL CARCINOMA	NEOPLASMS BENIGN, MALIGNANT AND UNSPECIFIED (INCL CYSTS AND POLYPS)	2	7.22 ( 1.58 - 32.95 )	7.22 ( 8.93 )
PERIODONTAL DISEASE	GASTROINTESTINAL DISORDERS	2	0.71 ( 0.18 - 2.9 )	0.71 ( 0.22 )
ABDOMINAL HERNIA	GASTROINTESTINAL DISORDERS	2	0.16 ( 0.04 - 0.62 )	0.16 ( 9.16 )
ACUTE HEPATITIS C	INFECTIONS AND INFESTATIONS	2	24.06 ( 4.02 - 144.01 )	24.06 ( 26.52 )
INFECTION MASKED	INFECTIONS AND INFESTATIONS	2	9.02 ( 1.92 - 42.49 )	9.02 ( 11.41 )
NOCARDIOSIS	INFECTIONS AND INFESTATIONS	2	0.71 ( 0.18 - 2.9 )	0.71 ( 0.22 )
PERICARDIAL MASS	CARDIAC DISORDERS	2	24.06 ( 4.02 - 144.01 )	24.06 ( 26.52 )
PRESYNCOPE	NERVOUS SYSTEM DISORDERS	2	0.15 ( 0.04 - 0.61 )	0.15 ( 9.4 )
THROMBOCYTOPENIC PURPURA	BLOOD AND LYMPHATIC SYSTEM DISORDERS	2	2.78 ( 0.66 - 11.7 )	2.78 ( 2.11 )
HEART BLOCK CONGENITAL	CONGENITAL, FAMILIAL AND GENETIC DISORDERS	2	72.18 ( 6.55 - 796.11 )	72.18 ( 46.8 )
SPINA BIFIDA OCCULTA	CONGENITAL, FAMILIAL AND GENETIC DISORDERS	2	Inf ( NaN - Inf )	Inf ( 72.18 )
APLASIA CUTIS CONGENITA	CONGENITAL, FAMILIAL AND GENETIC DISORDERS	2	72.18 ( 6.55 - 796.11 )	72.18 ( 46.8 )
ORAL FUNGAL INFECTION	INFECTIONS AND INFESTATIONS	2	0.28 ( 0.07 - 1.12 )	0.28 ( 3.71 )
OROPHARYNGEAL DISCOMFORT	RESPIRATORY, THORACIC AND MEDIASTINAL DISORDERS	2	0.23 ( 0.06 - 0.94 )	0.23 ( 4.97 )
CARDIOVERSION	SURGICAL AND MEDICAL PROCEDURES	2	2.41 ( 0.58 - 10.07 )	2.41 ( 1.54 )
GASTROENTERITIS SALMONELLA	INFECTIONS AND INFESTATIONS	2	1.18 ( 0.29 - 4.84 )	1.18 ( 0.06 )
CYTOMEGALOVIRUS COLITIS	INFECTIONS AND INFESTATIONS	2	1.6 ( 0.39 - 6.61 )	1.6 ( 0.44 )
SKIN HAEMORRHAGE	SKIN AND SUBCUTANEOUS TISSUE DISORDERS	2	0.12 ( 0.03 - 0.49 )	0.12 ( 12.42 )
NON-ALCOHOLIC FATTY LIVER	HEPATOBILIARY DISORDERS	2	2.19 ( 0.52 - 9.12 )	2.19 ( 1.22 )
METABOLIC ALKALOSIS	METABOLISM AND NUTRITION DISORDERS	2	4.51 ( 1.04 - 19.62 )	4.51 ( 4.86 )
RESPIRATORY ALKALOSIS	RESPIRATORY, THORACIC AND MEDIASTINAL DISORDERS	2	3.14 ( 0.74 - 13.31 )	3.14 ( 2.68 )
NEOPLASM OF APPENDIX	NEOPLASMS BENIGN, MALIGNANT AND UNSPECIFIED (INCL CYSTS AND POLYPS)	2	4.25 ( 0.98 - 18.38 )	4.25 ( 4.44 )
HYPERTENSIVE HEART DISEASE	CARDIAC DISORDERS	2	0.83 ( 0.2 - 3.37 )	0.83 ( 0.07 )
FREQUENT BOWEL MOVEMENTS	GASTROINTESTINAL DISORDERS	2	0.13 ( 0.03 - 0.52 )	0.13 ( 11.68 )
MYCOBACTERIUM MARINUM INFECTION	INFECTIONS AND INFESTATIONS	2	1.34 ( 0.33 - 5.48 )	1.34 ( 0.16 )
OSTEOMYELITIS BACTERIAL	INFECTIONS AND INFESTATIONS	2	3.28 ( 0.77 - 13.95 )	3.28 ( 2.91 )
STAPHYLOCOCCAL BACTERAEMIA	INFECTIONS AND INFESTATIONS	2	0.54 ( 0.13 - 2.19 )	0.54 ( 0.76 )
PROSTATIC DISORDER	REPRODUCTIVE SYSTEM AND BREAST DISORDERS	2	0.39 ( 0.1 - 1.57 )	0.39 ( 1.89 )
INFECTIVE TENOSYNOVITIS	INFECTIONS AND INFESTATIONS	2	1.47 ( 0.36 - 6.06 )	1.47 ( 0.29 )
ATRIOVENTRICULAR BLOCK COMPLETE	CARDIAC DISORDERS	2	0.47 ( 0.12 - 1.89 )	0.47 ( 1.19 )
MONOCYTE COUNT DECREASED	INVESTIGATIONS	2	2.78 ( 0.66 - 11.7 )	2.78 ( 2.11 )
SKIN ATROPHY	SKIN AND SUBCUTANEOUS TISSUE DISORDERS	2	0.17 ( 0.04 - 0.68 )	0.17 ( 8.08 )
ONYCHOLYSIS	SKIN AND SUBCUTANEOUS TISSUE DISORDERS	2	1.57 ( 0.38 - 6.46 )	1.57 ( 0.4 )
INJURY ASSOCIATED WITH DEVICE	GENERAL DISORDERS AND ADMINISTRATION SITE CONDITIONS	2	0.05 ( 0.01 - 0.21 )	0.05 ( 34.86 )
IMMUNOSUPPRESSANT DRUG LEVEL INCREASED	INVESTIGATIONS	2	3.8 ( 0.88 - 16.31 )	3.8 ( 3.73 )
DISSEMINATED STRONGYLOIDIASIS	INFECTIONS AND INFESTATIONS	2	3.61 ( 0.84 - 15.44 )	3.61 ( 3.43 )
ENZYME ABNORMALITY	METABOLISM AND NUTRITION DISORDERS	2	3.01 ( 0.71 - 12.73 )	3.01 ( 2.47 )
INJECTION SITE DISCOMFORT	GENERAL DISORDERS AND ADMINISTRATION SITE CONDITIONS	2	0.06 ( 0.02 - 0.25 )	0.06 ( 27.67 )
VAGINAL DISORDER	REPRODUCTIVE SYSTEM AND BREAST DISORDERS	2	1.31 ( 0.32 - 5.38 )	1.31 ( 0.14 )
HERPES ZOSTER OTICUS	INFECTIONS AND INFESTATIONS	2	1.27 ( 0.31 - 5.19 )	1.27 ( 0.11 )
COMPLICATION ASSOCIATED WITH DEVICE	GENERAL DISORDERS AND ADMINISTRATION SITE CONDITIONS	2	0.32 ( 0.08 - 1.27 )	0.32 ( 2.92 )
JOINT WARMTH	MUSCULOSKELETAL AND CONNECTIVE TISSUE DISORDERS	2	0.18 ( 0.04 - 0.72 )	0.18 ( 7.51 )
DYSCALCULIA	NERVOUS SYSTEM DISORDERS	2	9.02 ( 1.92 - 42.49 )	9.02 ( 11.41 )
LYMPHOCYTE MORPHOLOGY ABNORMAL	INVESTIGATIONS	2	3.01 ( 0.71 - 12.73 )	3.01 ( 2.47 )
GESTATIONAL DIABETES	PREGNANCY, PUERPERIUM AND PERINATAL CONDITIONS	2	0.44 ( 0.11 - 1.77 )	0.44 ( 1.41 )
PERINATAL DEPRESSION	PSYCHIATRIC DISORDERS	2	8.02 ( 1.73 - 37.12 )	8.02 ( 10.06 )
CORONAVIRUS INFECTION	INFECTIONS AND INFESTATIONS	2	0.26 ( 0.07 - 1.05 )	0.26 ( 4.11 )
WITHDRAWAL SYNDROME	GENERAL DISORDERS AND ADMINISTRATION SITE CONDITIONS	2	0.32 ( 0.08 - 1.28 )	0.32 ( 2.88 )
EYE INJURY	INJURY, POISONING AND PROCEDURAL COMPLICATIONS	2	0.3 ( 0.07 - 1.19 )	0.3 ( 3.3 )
VITILIGO	SKIN AND SUBCUTANEOUS TISSUE DISORDERS	2	1.05 ( 0.26 - 4.27 )	1.05 ( 0 )
INFUSION SITE EXTRAVASATION	GENERAL DISORDERS AND ADMINISTRATION SITE CONDITIONS	2	0.41 ( 0.1 - 1.66 )	0.41 ( 1.65 )
JAW FRACTURE	INJURY, POISONING AND PROCEDURAL COMPLICATIONS	2	0.52 ( 0.13 - 2.11 )	0.52 ( 0.86 )
ACQUIRED POROKERATOSIS	SKIN AND SUBCUTANEOUS TISSUE DISORDERS	2	14.44 ( 2.8 - 74.42 )	14.44 ( 17.87 )
BONE DEFORMITY	MUSCULOSKELETAL AND CONNECTIVE TISSUE DISORDERS	2	0.42 ( 0.1 - 1.7 )	0.42 ( 1.56 )
SPLEEN DISORDER	BLOOD AND LYMPHATIC SYSTEM DISORDERS	2	0.78 ( 0.19 - 3.15 )	0.78 ( 0.13 )
LUNG OPACITY	RESPIRATORY, THORACIC AND MEDIASTINAL DISORDERS	2	1.02 ( 0.25 - 4.14 )	1.02 ( 0 )
Q FEVER	INFECTIONS AND INFESTATIONS	2	4.01 ( 0.93 - 17.28 )	4.01 ( 4.07 )
TOOTH DISCOLOURATION	GASTROINTESTINAL DISORDERS	2	2.01 ( 0.48 - 8.33 )	2.01 ( 0.95 )
BLISTER INFECTED	INFECTIONS AND INFESTATIONS	2	0.65 ( 0.16 - 2.63 )	0.65 ( 0.37 )
NEUROLOGICAL DECOMPENSATION	NERVOUS SYSTEM DISORDERS	2	3.01 ( 0.71 - 12.73 )	3.01 ( 2.47 )
ORAL MUCOSAL ERUPTION	GASTROINTESTINAL DISORDERS	2	0.91 ( 0.22 - 3.72 )	0.91 ( 0.02 )
CREATININE RENAL CLEARANCE DECREASED	INVESTIGATIONS	2	1.57 ( 0.38 - 6.46 )	1.57 ( 0.4 )
PRODUCT DOSE OMISSION IN ERROR	INJURY, POISONING AND PROCEDURAL COMPLICATIONS	2	0.05 ( 0.01 - 0.18 )	0.05 ( 39.73 )
HEPATIC ISCHAEMIA	HEPATOBILIARY DISORDERS	2	2.67 ( 0.64 - 11.24 )	2.67 ( 1.95 )
MUSCLE RELAXANT THERAPY	SURGICAL AND MEDICAL PROCEDURES	2	7.22 ( 1.58 - 32.95 )	7.22 ( 8.93 )
IDIOPATHIC PULMONARY FIBROSIS	RESPIRATORY, THORACIC AND MEDIASTINAL DISORDERS	2	0.77 ( 0.19 - 3.12 )	0.77 ( 0.14 )
ENTHESOPHYTE	MUSCULOSKELETAL AND CONNECTIVE TISSUE DISORDERS	2	24.06 ( 4.02 - 144.01 )	24.06 ( 26.52 )
BURSA DISORDER	MUSCULOSKELETAL AND CONNECTIVE TISSUE DISORDERS	2	0.94 ( 0.23 - 3.82 )	0.94 ( 0.01 )
OPHTHALMOPLEGIA	EYE DISORDERS	2	1.72 ( 0.42 - 7.1 )	1.72 ( 0.57 )
FOURNIER'S GANGRENE	INFECTIONS AND INFESTATIONS	2	2.67 ( 0.64 - 11.24 )	2.67 ( 1.95 )
GROIN ABSCESS	INFECTIONS AND INFESTATIONS	2	0.74 ( 0.18 - 3.02 )	0.74 ( 0.17 )
TERATOGENICITY	CONGENITAL, FAMILIAL AND GENETIC DISORDERS	2	Inf ( NaN - Inf )	Inf ( 72.18 )
DEVICE MALFUNCTION	PRODUCT ISSUES	2	0.02 ( 0 - 0.07 )	0.02 ( 114.19 )
GINGIVAL ABSCESS	INFECTIONS AND INFESTATIONS	2	0.81 ( 0.2 - 3.29 )	0.81 ( 0.09 )
BONE LESION	MUSCULOSKELETAL AND CONNECTIVE TISSUE DISORDERS	2	0.85 ( 0.21 - 3.45 )	0.85 ( 0.05 )
MORTON'S NEURALGIA	NERVOUS SYSTEM DISORDERS	2	0.94 ( 0.23 - 3.82 )	0.94 ( 0.01 )
PULMONARY HAEMORRHAGE	RESPIRATORY, THORACIC AND MEDIASTINAL DISORDERS	2	0.58 ( 0.14 - 2.35 )	0.58 ( 0.59 )
MONOCYTOSIS	BLOOD AND LYMPHATIC SYSTEM DISORDERS	2	2.89 ( 0.68 - 12.19 )	2.89 ( 2.28 )
EMPHYSEMATOUS CYSTITIS	INFECTIONS AND INFESTATIONS	2	7.22 ( 1.58 - 32.95 )	7.22 ( 8.93 )
VACCINATION FAILURE	GENERAL DISORDERS AND ADMINISTRATION SITE CONDITIONS	2	1.16 ( 0.28 - 4.76 )	1.16 ( 0.04 )
CONTRAST MEDIA ALLERGY	IMMUNE SYSTEM DISORDERS	2	0.4 ( 0.1 - 1.62 )	0.4 ( 1.75 )
BREAST MASS	REPRODUCTIVE SYSTEM AND BREAST DISORDERS	2	0.11 ( 0.03 - 0.42 )	0.11 ( 15.09 )
TYMPANIC MEMBRANE PERFORATION	EAR AND LABYRINTH DISORDERS	2	0.33 ( 0.08 - 1.32 )	0.33 ( 2.73 )
CAROTID ARTERY STENOSIS	NERVOUS SYSTEM DISORDERS	2	0.43 ( 0.11 - 1.72 )	0.43 ( 1.52 )
SPLENIC ABSCESS	INFECTIONS AND INFESTATIONS	2	3.8 ( 0.88 - 16.31 )	3.8 ( 3.73 )
SPLENIC INFECTION BACTERIAL	INFECTIONS AND INFESTATIONS	2	Inf ( NaN - Inf )	Inf ( 72.18 )
CONJUNCTIVAL DISORDER	EYE DISORDERS	2	10.31 ( 2.14 - 49.64 )	10.31 ( 13.08 )
BLOOD LOSS ANAEMIA	BLOOD AND LYMPHATIC SYSTEM DISORDERS	2	1.95 ( 0.47 - 8.09 )	1.95 ( 0.88 )
SPINAL SUBARACHNOID HAEMORRHAGE	NERVOUS SYSTEM DISORDERS	2	24.06 ( 4.02 - 144.01 )	24.06 ( 26.52 )
ENZYME LEVEL ABNORMAL	INVESTIGATIONS	2	6.02 ( 1.35 - 26.88 )	6.02 ( 7.17 )
SARS-COV-2 TEST POSITIVE	INVESTIGATIONS	2	0.06 ( 0.02 - 0.24 )	0.06 ( 29.33 )
MEAN PLATELET VOLUME DECREASED	INVESTIGATIONS	2	1.16 ( 0.28 - 4.76 )	1.16 ( 0.04 )
FLANK PAIN	MUSCULOSKELETAL AND CONNECTIVE TISSUE DISORDERS	2	0.19 ( 0.05 - 0.77 )	0.19 ( 6.74 )
CUSHINGOID	ENDOCRINE DISORDERS	2	0.37 ( 0.09 - 1.48 )	0.37 ( 2.17 )
RENAL PAIN	RENAL AND URINARY DISORDERS	2	0.15 ( 0.04 - 0.61 )	0.15 ( 9.35 )
MINERAL SUPPLEMENTATION	SURGICAL AND MEDICAL PROCEDURES	2	3.14 ( 0.74 - 13.31 )	3.14 ( 2.68 )
PRODUCT PACKAGING DIFFICULT TO OPEN	PRODUCT ISSUES	2	10.31 ( 2.14 - 49.64 )	10.31 ( 13.08 )
UMBILICAL HERNIA	GASTROINTESTINAL DISORDERS	2	0.16 ( 0.04 - 0.66 )	0.16 ( 8.51 )
ACANTHOSIS	SKIN AND SUBCUTANEOUS TISSUE DISORDERS	2	6.56 ( 1.45 - 29.61 )	6.56 ( 7.98 )
SYNOVIAL DISORDER	MUSCULOSKELETAL AND CONNECTIVE TISSUE DISORDERS	2	0.39 ( 0.1 - 1.57 )	0.39 ( 1.89 )
BLEPHARITIS	EYE DISORDERS	2	0.56 ( 0.14 - 2.24 )	0.56 ( 0.7 )
VITAMIN B12 DECREASED	INVESTIGATIONS	2	0.45 ( 0.11 - 1.81 )	0.45 ( 1.34 )
DELUSION	PSYCHIATRIC DISORDERS	2	0.57 ( 0.14 - 2.3 )	0.57 ( 0.65 )
SUDDEN DEATH	GENERAL DISORDERS AND ADMINISTRATION SITE CONDITIONS	2	0.29 ( 0.07 - 1.16 )	0.29 ( 3.48 )
PRODUCT DISPENSING ERROR	INJURY, POISONING AND PROCEDURAL COMPLICATIONS	2	0.17 ( 0.04 - 0.67 )	0.17 ( 8.19 )
VENTRICULAR EXTRASYSTOLES	CARDIAC DISORDERS	2	0.32 ( 0.08 - 1.3 )	0.32 ( 2.83 )
TOXOPLASMOSIS	INFECTIONS AND INFESTATIONS	2	1.57 ( 0.38 - 6.46 )	1.57 ( 0.4 )
CEREBRAL TOXOPLASMOSIS	INFECTIONS AND INFESTATIONS	2	1.2 ( 0.29 - 4.92 )	1.2 ( 0.07 )
MALIGNANT NEOPLASM OF PLEURA	NEOPLASMS BENIGN, MALIGNANT AND UNSPECIFIED (INCL CYSTS AND POLYPS)	2	7.22 ( 1.58 - 32.95 )	7.22 ( 8.93 )
ESCHAR	INJURY, POISONING AND PROCEDURAL COMPLICATIONS	2	4.01 ( 0.93 - 17.28 )	4.01 ( 4.07 )
FAT NECROSIS	GENERAL DISORDERS AND ADMINISTRATION SITE CONDITIONS	2	2.33 ( 0.56 - 9.73 )	2.33 ( 1.42 )
LYMPHOCYTIC LEUKAEMIA	NEOPLASMS BENIGN, MALIGNANT AND UNSPECIFIED (INCL CYSTS AND POLYPS)	2	2.06 ( 0.5 - 8.58 )	2.06 ( 1.04 )
CORYNEBACTERIUM INFECTION	INFECTIONS AND INFESTATIONS	2	2.89 ( 0.68 - 12.19 )	2.89 ( 2.28 )
ANAL POLYP	GASTROINTESTINAL DISORDERS	2	7.22 ( 1.58 - 32.95 )	7.22 ( 8.93 )
WHITE BLOOD CELL DISORDER	BLOOD AND LYMPHATIC SYSTEM DISORDERS	2	0.61 ( 0.15 - 2.45 )	0.61 ( 0.5 )
BLINDNESS TRANSIENT	EYE DISORDERS	2	0.5 ( 0.12 - 2.02 )	0.5 ( 0.98 )
LIP EXFOLIATION	GASTROINTESTINAL DISORDERS	2	2.58 ( 0.61 - 10.82 )	2.58 ( 1.8 )
MUCOSAL HYPERAEMIA	GENERAL DISORDERS AND ADMINISTRATION SITE CONDITIONS	2	36.09 ( 5.08 - 256.23 )	36.09 ( 34.12 )
APOPTOSIS	METABOLISM AND NUTRITION DISORDERS	2	36.09 ( 5.08 - 256.23 )	36.09 ( 34.12 )
ACCIDENTAL EXPOSURE TO PRODUCT	INJURY, POISONING AND PROCEDURAL COMPLICATIONS	2	0.02 ( 0.01 - 0.08 )	0.02 ( 92.73 )
EXPOSURE VIA SKIN CONTACT	INJURY, POISONING AND PROCEDURAL COMPLICATIONS	2	0.33 ( 0.08 - 1.33 )	0.33 ( 2.68 )
RENAL SURGERY	SURGICAL AND MEDICAL PROCEDURES	2	1.8 ( 0.44 - 7.47 )	1.8 ( 0.68 )
IMMOBILISATION SYNDROME	MUSCULOSKELETAL AND CONNECTIVE TISSUE DISORDERS	2	2.89 ( 0.68 - 12.19 )	2.89 ( 2.28 )
GALLBLADDER EMPYEMA	INFECTIONS AND INFESTATIONS	2	8.02 ( 1.73 - 37.12 )	8.02 ( 10.06 )
PNEUMOTHORAX SPONTANEOUS	RESPIRATORY, THORACIC AND MEDIASTINAL DISORDERS	2	1.64 ( 0.4 - 6.77 )	1.64 ( 0.48 )
TINEA PEDIS	INFECTIONS AND INFESTATIONS	2	0.33 ( 0.08 - 1.33 )	0.33 ( 2.7 )
SUDDEN HEARING LOSS	EAR AND LABYRINTH DISORDERS	2	0.62 ( 0.15 - 2.5 )	0.62 ( 0.47 )
DYSMETRIA	NERVOUS SYSTEM DISORDERS	2	10.31 ( 2.14 - 49.64 )	10.31 ( 13.08 )
DERMATITIS EXFOLIATIVE GENERALISED	SKIN AND SUBCUTANEOUS TISSUE DISORDERS	2	1.85 ( 0.45 - 7.67 )	1.85 ( 0.74 )
FEEDING INTOLERANCE	METABOLISM AND NUTRITION DISORDERS	2	8.02 ( 1.73 - 37.12 )	8.02 ( 10.06 )
RECTAL FISSURE	GASTROINTESTINAL DISORDERS	2	2.67 ( 0.64 - 11.24 )	2.67 ( 1.95 )
HAEMORRHAGE SUBCUTANEOUS	SKIN AND SUBCUTANEOUS TISSUE DISORDERS	2	0.55 ( 0.14 - 2.23 )	0.55 ( 0.72 )
SYMBLEPHARON	EYE DISORDERS	2	8.02 ( 1.73 - 37.12 )	8.02 ( 10.06 )
HISTOPLASMOSIS DISSEMINATED	INFECTIONS AND INFESTATIONS	2	0.36 ( 0.09 - 1.45 )	0.36 ( 2.24 )
FOOT AMPUTATION	SURGICAL AND MEDICAL PROCEDURES	2	1.8 ( 0.44 - 7.47 )	1.8 ( 0.68 )
NEUROSARCOIDOSIS	NERVOUS SYSTEM DISORDERS	2	4.01 ( 0.93 - 17.28 )	4.01 ( 4.07 )
OESOPHAGEAL CARCINOMA	NEOPLASMS BENIGN, MALIGNANT AND UNSPECIFIED (INCL CYSTS AND POLYPS)	2	0.33 ( 0.08 - 1.32 )	0.33 ( 2.73 )
TENSION HEADACHE	NERVOUS SYSTEM DISORDERS	2	0.72 ( 0.18 - 2.93 )	0.72 ( 0.21 )
UTERINE LEIOMYOMA	NEOPLASMS BENIGN, MALIGNANT AND UNSPECIFIED (INCL CYSTS AND POLYPS)	2	0.12 ( 0.03 - 0.49 )	0.12 ( 12.69 )
PUNCTATE KERATITIS	EYE DISORDERS	2	5.55 ( 1.25 - 24.61 )	5.55 ( 6.47 )
EPIDERMOLYSIS	SKIN AND SUBCUTANEOUS TISSUE DISORDERS	2	14.44 ( 2.8 - 74.42 )	14.44 ( 17.87 )
DIGITAL PULPITIS	SKIN AND SUBCUTANEOUS TISSUE DISORDERS	2	Inf ( NaN - Inf )	Inf ( 72.18 )
STREPTOCOCCAL SEPSIS	INFECTIONS AND INFESTATIONS	2	0.84 ( 0.21 - 3.41 )	0.84 ( 0.06 )
HERPES SIMPLEX VIRAEMIA	INFECTIONS AND INFESTATIONS	2	6.56 ( 1.45 - 29.61 )	6.56 ( 7.98 )
DISSEMINATED BACILLUS CALMETTE-GUERIN INFECTION	INFECTIONS AND INFESTATIONS	2	14.44 ( 2.8 - 74.42 )	14.44 ( 17.87 )
MENINGITIS LISTERIA	INFECTIONS AND INFESTATIONS	2	1.34 ( 0.33 - 5.48 )	1.34 ( 0.16 )
OROPHARYNGEAL CANDIDIASIS	INFECTIONS AND INFESTATIONS	2	1.2 ( 0.29 - 4.92 )	1.2 ( 0.07 )
PARADOXICAL SKIN REACTION	SKIN AND SUBCUTANEOUS TISSUE DISORDERS	2	72.18 ( 6.55 - 796.11 )	72.18 ( 46.8 )
MYCOBACTERIUM CHELONAE INFECTION	INFECTIONS AND INFESTATIONS	2	2.01 ( 0.48 - 8.33 )	2.01 ( 0.95 )
TENSION	PSYCHIATRIC DISORDERS	2	0.73 ( 0.18 - 2.96 )	0.73 ( 0.2 )
HYPERVIGILANCE	PSYCHIATRIC DISORDERS	2	24.06 ( 4.02 - 144.01 )	24.06 ( 26.52 )
ABNORMAL DREAMS	PSYCHIATRIC DISORDERS	2	0.43 ( 0.11 - 1.73 )	0.43 ( 1.5 )
PARASOMNIA	PSYCHIATRIC DISORDERS	2	Inf ( NaN - Inf )	Inf ( 72.18 )
OPHTHALMIC VEIN THROMBOSIS	EYE DISORDERS	2	2.33 ( 0.56 - 9.73 )	2.33 ( 1.42 )
OESOPHAGEAL PAPILLOMA	NEOPLASMS BENIGN, MALIGNANT AND UNSPECIFIED (INCL CYSTS AND POLYPS)	2	10.31 ( 2.14 - 49.64 )	10.31 ( 13.08 )
MACROANGIOPATHY	VASCULAR DISORDERS	2	8.02 ( 1.73 - 37.12 )	8.02 ( 10.06 )
PANCREATIC DUCT DILATATION	GASTROINTESTINAL DISORDERS	2	3.8 ( 0.88 - 16.31 )	3.8 ( 3.73 )
VITAL CAPACITY DECREASED	INVESTIGATIONS	2	18.05 ( 3.31 - 98.53 )	18.05 ( 21.47 )
SUBCUTANEOUS DRUG ABSORPTION IMPAIRED	SKIN AND SUBCUTANEOUS TISSUE DISORDERS	2	1.02 ( 0.25 - 4.14 )	1.02 ( 0 )
GENERAL SYMPTOM	GENERAL DISORDERS AND ADMINISTRATION SITE CONDITIONS	2	0.25 ( 0.06 - 0.99 )	0.25 ( 4.55 )
MORAXELLA INFECTION	INFECTIONS AND INFESTATIONS	2	5.55 ( 1.25 - 24.61 )	5.55 ( 6.47 )
HERPES ZOSTER CUTANEOUS DISSEMINATED	INFECTIONS AND INFESTATIONS	2	2.78 ( 0.66 - 11.7 )	2.78 ( 2.11 )
EXCESSIVE GRANULATION TISSUE	SKIN AND SUBCUTANEOUS TISSUE DISORDERS	2	2.67 ( 0.64 - 11.24 )	2.67 ( 1.95 )
MICTURITION URGENCY	RENAL AND URINARY DISORDERS	2	0.23 ( 0.06 - 0.92 )	0.23 ( 5.13 )
ACINETOBACTER INFECTION	INFECTIONS AND INFESTATIONS	2	2.67 ( 0.64 - 11.24 )	2.67 ( 1.95 )
GOITRE	ENDOCRINE DISORDERS	2	0.22 ( 0.05 - 0.87 )	0.22 ( 5.63 )
METABOLIC DISORDER	METABOLISM AND NUTRITION DISORDERS	2	1.2 ( 0.29 - 4.92 )	1.2 ( 0.07 )
LABORATORY TEST INTERFERENCE	INVESTIGATIONS	2	14.44 ( 2.8 - 74.42 )	14.44 ( 17.87 )
DRUG LEVEL DECREASED	INVESTIGATIONS	2	0.69 ( 0.17 - 2.81 )	0.69 ( 0.26 )
RETCHING	GASTROINTESTINAL DISORDERS	2	0.16 ( 0.04 - 0.64 )	0.16 ( 8.72 )
THYROXINE INCREASED	INVESTIGATIONS	2	4.81 ( 1.1 - 21.04 )	4.81 ( 5.33 )
TOTAL LUNG CAPACITY DECREASED	INVESTIGATIONS	2	1 ( 0.25 - 4.09 )	1 ( 0 )
AMAUROSIS	EYE DISORDERS	2	6.02 ( 1.35 - 26.88 )	6.02 ( 7.17 )
MONOCYTE PERCENTAGE DECREASED	INVESTIGATIONS	2	9.02 ( 1.92 - 42.49 )	9.02 ( 11.41 )
SEROMA	INJURY, POISONING AND PROCEDURAL COMPLICATIONS	2	0.78 ( 0.19 - 3.18 )	0.78 ( 0.12 )
SYSTEMIC CANDIDA	INFECTIONS AND INFESTATIONS	2	1.72 ( 0.42 - 7.1 )	1.72 ( 0.57 )
CORONARY ARTERY STENOSIS	CARDIAC DISORDERS	2	0.3 ( 0.08 - 1.21 )	0.3 ( 3.2 )
CEREBELLAR INFARCTION	NERVOUS SYSTEM DISORDERS	2	0.8 ( 0.2 - 3.26 )	0.8 ( 0.1 )
ARTHROPOD BITE	INJURY, POISONING AND PROCEDURAL COMPLICATIONS	2	0.06 ( 0.02 - 0.25 )	0.06 ( 27.67 )
SKIN TEST POSITIVE	INVESTIGATIONS	2	8.02 ( 1.73 - 37.12 )	8.02 ( 10.06 )
CONGENITAL CORNEAL ANOMALY	CONGENITAL, FAMILIAL AND GENETIC DISORDERS	2	Inf ( NaN - Inf )	Inf ( 72.18 )
MATERNAL DRUGS AFFECTING FOETUS	INJURY, POISONING AND PROCEDURAL COMPLICATIONS	2	1.72 ( 0.42 - 7.1 )	1.72 ( 0.57 )
COLLAGEN DISORDER	MUSCULOSKELETAL AND CONNECTIVE TISSUE DISORDERS	2	3.44 ( 0.81 - 14.66 )	3.44 ( 3.16 )
HEPARIN-INDUCED THROMBOCYTOPENIA	BLOOD AND LYMPHATIC SYSTEM DISORDERS	2	5.55 ( 1.25 - 24.61 )	5.55 ( 6.47 )
PCO2 DECREASED	INVESTIGATIONS	2	6.56 ( 1.45 - 29.61 )	6.56 ( 7.98 )
PROCEDURAL COMPLICATION	INJURY, POISONING AND PROCEDURAL COMPLICATIONS	2	0.12 ( 0.03 - 0.48 )	0.12 ( 12.77 )
CHRONIC HEPATITIS	HEPATOBILIARY DISORDERS	2	2.78 ( 0.66 - 11.7 )	2.78 ( 2.11 )
NEURITIS	NERVOUS SYSTEM DISORDERS	2	0.81 ( 0.2 - 3.29 )	0.81 ( 0.09 )
PERIPHERAL SENSORIMOTOR NEUROPATHY	NERVOUS SYSTEM DISORDERS	2	1.27 ( 0.31 - 5.19 )	1.27 ( 0.11 )
PERIPHERAL MOTOR NEUROPATHY	NERVOUS SYSTEM DISORDERS	2	4.51 ( 1.04 - 19.62 )	4.51 ( 4.86 )
INTESTINAL HAEMORRHAGE	GASTROINTESTINAL DISORDERS	2	0.31 ( 0.08 - 1.26 )	0.31 ( 3 )
BRAIN NEOPLASM MALIGNANT	NEOPLASMS BENIGN, MALIGNANT AND UNSPECIFIED (INCL CYSTS AND POLYPS)	2	0.79 ( 0.2 - 3.22 )	0.79 ( 0.11 )
EOSINOPHIL COUNT ABNORMAL	INVESTIGATIONS	2	10.31 ( 2.14 - 49.64 )	10.31 ( 13.08 )
GASTRITIS HAEMORRHAGIC	GASTROINTESTINAL DISORDERS	2	1.76 ( 0.43 - 7.28 )	1.76 ( 0.63 )
BILIARY DILATATION	HEPATOBILIARY DISORDERS	2	2.01 ( 0.48 - 8.33 )	2.01 ( 0.95 )
SELF-MEDICATION	SURGICAL AND MEDICAL PROCEDURES	2	2.26 ( 0.54 - 9.41 )	2.26 ( 1.32 )
PNEUMONIA ASPIRATION	INFECTIONS AND INFESTATIONS	2	0.13 ( 0.03 - 0.53 )	0.13 ( 11.41 )
RESPIRATORY DEPRESSION	RESPIRATORY, THORACIC AND MEDIASTINAL DISORDERS	2	1.85 ( 0.45 - 7.67 )	1.85 ( 0.74 )
GLOMERULOSCLEROSIS	RENAL AND URINARY DISORDERS	2	7.22 ( 1.58 - 32.95 )	7.22 ( 8.93 )
CARCINOEMBRYONIC ANTIGEN INCREASED	INVESTIGATIONS	2	1.85 ( 0.45 - 7.67 )	1.85 ( 0.74 )
BAND NEUTROPHIL PERCENTAGE INCREASED	INVESTIGATIONS	2	18.05 ( 3.31 - 98.53 )	18.05 ( 21.47 )
BLOOD IMMUNOGLOBULIN A INCREASED	INVESTIGATIONS	2	3.01 ( 0.71 - 12.73 )	3.01 ( 2.47 )
COMPLEMENT FACTOR C4 DECREASED	INVESTIGATIONS	2	2.49 ( 0.59 - 10.43 )	2.49 ( 1.67 )
INDURATION	GENERAL DISORDERS AND ADMINISTRATION SITE CONDITIONS	2	0.47 ( 0.12 - 1.9 )	0.47 ( 1.17 )
BLOOD LACTATE DEHYDROGENASE DECREASED	INVESTIGATIONS	2	14.44 ( 2.8 - 74.42 )	14.44 ( 17.87 )
VENTRICULAR FIBRILLATION	CARDIAC DISORDERS	2	0.54 ( 0.13 - 2.18 )	0.54 ( 0.78 )
GASTRIC ULCER PERFORATION	GASTROINTESTINAL DISORDERS	2	0.6 ( 0.15 - 2.41 )	0.6 ( 0.54 )
BRAIN STEM INFARCTION	NERVOUS SYSTEM DISORDERS	2	1.27 ( 0.31 - 5.19 )	1.27 ( 0.11 )
LYMPHOCYTE STIMULATION TEST POSITIVE	INVESTIGATIONS	2	2.49 ( 0.59 - 10.43 )	2.49 ( 1.67 )
SPUTUM CULTURE POSITIVE	INVESTIGATIONS	2	1.57 ( 0.38 - 6.46 )	1.57 ( 0.4 )
HYPERCOAGULATION	BLOOD AND LYMPHATIC SYSTEM DISORDERS	2	1.27 ( 0.31 - 5.19 )	1.27 ( 0.11 )
HEART SOUNDS ABNORMAL	INVESTIGATIONS	2	4.51 ( 1.04 - 19.62 )	4.51 ( 4.86 )
PSYCHOTIC DISORDER	PSYCHIATRIC DISORDERS	2	0.39 ( 0.1 - 1.56 )	0.39 ( 1.91 )
URINE KETONE BODY PRESENT	INVESTIGATIONS	2	3.8 ( 0.88 - 16.31 )	3.8 ( 3.73 )
RIGHT VENTRICULAR SYSTOLIC PRESSURE INCREASED	INVESTIGATIONS	2	72.18 ( 6.55 - 796.11 )	72.18 ( 46.8 )
CARDIAC FAILURE CHRONIC	CARDIAC DISORDERS	2	0.83 ( 0.2 - 3.37 )	0.83 ( 0.07 )
DILATATION ATRIAL	CARDIAC DISORDERS	2	1.8 ( 0.44 - 7.47 )	1.8 ( 0.68 )
MONOCYTE PERCENTAGE INCREASED	INVESTIGATIONS	2	4.81 ( 1.1 - 21.04 )	4.81 ( 5.33 )
EYELID DISORDER	EYE DISORDERS	2	0.54 ( 0.13 - 2.19 )	0.54 ( 0.76 )
SINUS BRADYCARDIA	CARDIAC DISORDERS	2	1.36 ( 0.33 - 5.59 )	1.36 ( 0.19 )
GLOMERULONEPHRITIS PROLIFERATIVE	RENAL AND URINARY DISORDERS	2	3.28 ( 0.77 - 13.95 )	3.28 ( 2.91 )
VASCULITIS NECROTISING	VASCULAR DISORDERS	2	1.18 ( 0.29 - 4.84 )	1.18 ( 0.06 )
AORTIC STENOSIS	VASCULAR DISORDERS	2	0.41 ( 0.1 - 1.64 )	0.41 ( 1.7 )
QRS AXIS ABNORMAL	INVESTIGATIONS	2	4.51 ( 1.04 - 19.62 )	4.51 ( 4.86 )
DIFFUSE ALVEOLAR DAMAGE	RESPIRATORY, THORACIC AND MEDIASTINAL DISORDERS	2	1.34 ( 0.33 - 5.48 )	1.34 ( 0.16 )
BLOOD FIBRINOGEN INCREASED	INVESTIGATIONS	2	2.78 ( 0.66 - 11.7 )	2.78 ( 2.11 )
CULTURE URINE POSITIVE	INVESTIGATIONS	2	2.26 ( 0.54 - 9.41 )	2.26 ( 1.32 )
LIVER ABSCESS	INFECTIONS AND INFESTATIONS	2	0.47 ( 0.12 - 1.9 )	0.47 ( 1.17 )
PORTAL HYPERTENSION	HEPATOBILIARY DISORDERS	2	1.42 ( 0.34 - 5.81 )	1.42 ( 0.23 )
MELANOSIS	SKIN AND SUBCUTANEOUS TISSUE DISORDERS	2	72.18 ( 6.55 - 796.11 )	72.18 ( 46.8 )
EROSIVE OESOPHAGITIS	GASTROINTESTINAL DISORDERS	2	1.68 ( 0.41 - 6.93 )	1.68 ( 0.52 )
RETINAL DETACHMENT	EYE DISORDERS	2	0.14 ( 0.04 - 0.57 )	0.14 ( 10.43 )
HYPERAEMIA	VASCULAR DISORDERS	2	1.24 ( 0.3 - 5.1 )	1.24 ( 0.09 )
MULTI-ORGAN DISORDER	GENERAL DISORDERS AND ADMINISTRATION SITE CONDITIONS	2	1.9 ( 0.46 - 7.87 )	1.9 ( 0.81 )
HAEMOLYSIS	BLOOD AND LYMPHATIC SYSTEM DISORDERS	2	1.5 ( 0.37 - 6.19 )	1.5 ( 0.32 )
LIP NEOPLASM MALIGNANT STAGE UNSPECIFIED	NEOPLASMS BENIGN, MALIGNANT AND UNSPECIFIED (INCL CYSTS AND POLYPS)	2	3.01 ( 0.71 - 12.73 )	3.01 ( 2.47 )
UNINTENDED PREGNANCY	PREGNANCY, PUERPERIUM AND PERINATAL CONDITIONS	2	3.28 ( 0.77 - 13.95 )	3.28 ( 2.91 )
MIXED CONNECTIVE TISSUE DISEASE	MUSCULOSKELETAL AND CONNECTIVE TISSUE DISORDERS	2	1.13 ( 0.28 - 4.61 )	1.13 ( 0.03 )
PULMONARY EOSINOPHILIA	RESPIRATORY, THORACIC AND MEDIASTINAL DISORDERS	2	9.02 ( 1.92 - 42.49 )	9.02 ( 11.41 )
FLUID INTAKE REDUCED	METABOLISM AND NUTRITION DISORDERS	2	0.55 ( 0.14 - 2.21 )	0.55 ( 0.74 )
ALVEOLAR PROTEINOSIS	RESPIRATORY, THORACIC AND MEDIASTINAL DISORDERS	2	5.16 ( 1.17 - 22.69 )	5.16 ( 5.86 )
GASTROINTESTINAL MUCOSAL DISORDER	GASTROINTESTINAL DISORDERS	2	4.01 ( 0.93 - 17.28 )	4.01 ( 4.07 )
PANCREATITIS CHRONIC	GASTROINTESTINAL DISORDERS	2	1.02 ( 0.25 - 4.14 )	1.02 ( 0 )
ISCHAEMIC HEPATITIS	HEPATOBILIARY DISORDERS	2	3.8 ( 0.88 - 16.31 )	3.8 ( 3.73 )
TWIN PREGNANCY	PREGNANCY, PUERPERIUM AND PERINATAL CONDITIONS	2	1.95 ( 0.47 - 8.09 )	1.95 ( 0.88 )
INTERNATIONAL NORMALISED RATIO DECREASED	INVESTIGATIONS	2	1.06 ( 0.26 - 4.33 )	1.06 ( 0.01 )
BETA HAEMOLYTIC STREPTOCOCCAL INFECTION	INFECTIONS AND INFESTATIONS	2	0.66 ( 0.16 - 2.68 )	0.66 ( 0.34 )
[truncated: 1,070 more rows]

## Sheet: Sheet2
								Journal name:Naunyn-Schmiedeberg's Archives of Pharmacology
								Article title:Systematic analysis of adverse reaction signals induced by Leflunomide, Upadacitinib, and Baricitinib in the treatment of rheumatoid arthritis using the FAERS database
								Author names:Jizheng Danga,Li Shua*
								aDepartment of Pharmacy, University-Town Hospital of Chongqing Medical University, Chongqing, China
								E-mail addresses: 800321@hospital.cqmu.edu.cn (Jizheng Dang), shuli1986@hospital.cqmu.edu.cn (Li Shu).
								Corresponding Author:Li Shu
								E-mail addresses:shuli1986@hospital.cqmu.edu.cn
