# Supplementary material for: Systematic analysis of adverse reaction signals induced by Leflunomide, Upadacitinib, and Baricitinib in the treatment of rheumatoid arthritis using the FAERS database
Source: Research Square preprint supplement (doi:10.21203/rs.3.rs-7331453/v1), 2025-08-21
Supplement: Supplementary file 2 [file 2b63c03713f7c2c32b6e6ce9.xlsx]

## Sheet: Sheet 1
soc_name_en	ac	n	a	b	c	d	ROR	RORL	RORU	PRR	PRRL	PRRU	XX	EBGM	EBGM05	IC	GMAE	EIC	VIC	SD	BCPNN250	IC025	ROR(95%Cl)	PRR(Chi-square value)	EBGM(EBGM05)	IC(IC025)	Determine whether it is a positive signal according to the ROR algorithm(lower limit of 95% CI>1, a≥3)	Determine whether it is a positive signal according to the PRR algorithm(PRR≥2, χ2≥4, a≥3)	Determine whether it is a positive signal according to the MGPS algorithm(EBGM05>2)	Determine whether it is a positive signal according to the BCPNN algorithm(IC025>0)
INFECTIONS AND INFESTATIONS	325864	3359129	1097	4456	324767	3028809	2.3	2.15	2.45	2.04	1.99	2.09	641.88	2.04	1.93	1.03	6234.62	1.02442	0.00227488	0.0476957	0.929027	0.93	2.3 ( 2.15 - 2.45 )	2.04 ( 641.88 )	2.04 ( 1.93 )	1.03 ( 0.93 )	yes	yes	no	yes
NERVOUS SYSTEM DISORDERS	170078	3359129	386	5167	169692	3183884	1.4	1.26	1.55	1.37	1.28	1.47	41.25	1.37	1.26	0.46	11945.3	0.455569	0.00576334	0.0759167	0.303736	0.31	1.4 ( 1.26 - 1.55 )	1.37 ( 41.25 )	1.37 ( 1.26 )	0.46 ( 0.31 )	yes	no	no	yes
RESPIRATORY, THORACIC AND MEDIASTINAL DISORDERS	159768	3359129	407	5146	159361	3194215	1.59	1.43	1.75	1.54	1.45	1.64	81.3	1.54	1.42	0.62	12716.1	0.621692	0.00548731	0.0740764	0.473539	0.48	1.59 ( 1.43 - 1.75 )	1.54 ( 81.3 )	1.54 ( 1.42 )	0.62 ( 0.48 )	yes	no	no	yes
BLOOD AND LYMPHATIC SYSTEM DISORDERS	28505	3359129	131	5422	28374	3325202	2.83	2.38	3.37	2.79	2.62	2.96	150.83	2.78	2.4	1.48	71270.8	1.45547	0.0162139	0.127334	1.20081	1.22	2.83 ( 2.38 - 3.37 )	2.79 ( 150.83 )	2.78 ( 2.4 )	1.48 ( 1.22 )	yes	yes	yes	yes
INVESTIGATIONS	182429	3359129	286	5267	182143	3171433	0.95	0.84	1.07	0.95	0.84	1.06	0.85	0.95	0.86	-0.08	11136.6	-0.0765056	0.00763646	0.0873868	-0.251279	-0.25	0.95 ( 0.84 - 1.07 )	0.95 ( 0.85 )	0.95 ( 0.86 )	-0.08 ( -0.25 )	no	no	no	no
VASCULAR DISORDERS	52179	3359129	206	5347	51973	3301603	2.45	2.13	2.81	2.39	2.26	2.53	169.13	2.39	2.13	1.26	38935.3	1.246	0.0104677	0.102312	1.04137	1.05	2.45 ( 2.13 - 2.81 )	2.39 ( 169.13 )	2.39 ( 2.13 )	1.26 ( 1.05 )	yes	yes	yes	yes
RENAL AND URINARY DISORDERS	29096	3359129	90	5463	29006	3324570	1.89	1.53	2.33	1.87	1.67	2.08	36.88	1.87	1.57	0.9	69823.2	0.889877	0.0233166	0.152698	0.584482	0.6	1.89 ( 1.53 - 2.33 )	1.87 ( 36.88 )	1.87 ( 1.57 )	0.9 ( 0.6 )	yes	no	no	yes
GENERAL DISORDERS AND ADMINISTRATION SITE CONDITIONS	785303	3359129	586	4967	784717	2568859	0.39	0.35	0.42	0.45	0.37	0.53	510.76	0.45	0.42	-1.15	2587.08	-1.14644	0.00392132	0.0626204	-1.27168	-1.27	0.39 ( 0.35 - 0.42 )	0.45 ( 510.76 )	0.45 ( 0.42 )	-1.15 ( -1.27 )	no	no	no	no
INJURY, POISONING AND PROCEDURAL COMPLICATIONS	266501	3359129	256	5297	266245	3087331	0.56	0.49	0.64	0.58	0.46	0.7	84.11	0.58	0.52	-0.78	7623.38	-0.781087	0.00847941	0.0920837	-0.965254	-0.97	0.56 ( 0.49 - 0.64 )	0.58 ( 84.11 )	0.58 ( 0.52 )	-0.78 ( -0.97 )	no	no	no	no
MUSCULOSKELETAL AND CONNECTIVE TISSUE DISORDERS	494334	3359129	320	5233	494014	2859562	0.35	0.32	0.4	0.39	0.28	0.5	355.28	0.39	0.36	-1.35	4109.86	-1.35012	0.00686112	0.0828319	-1.51578	-1.52	0.35 ( 0.32 - 0.4 )	0.39 ( 355.28 )	0.39 ( 0.36 )	-1.35 ( -1.52 )	no	no	no	no
SKIN AND SUBCUTANEOUS TISSUE DISORDERS	166592	3359129	177	5376	166415	3187161	0.63	0.54	0.73	0.64	0.5	0.79	37.05	0.64	0.57	-0.64	12195.3	-0.635117	0.0120785	0.109902	-0.854921	-0.86	0.63 ( 0.54 - 0.73 )	0.64 ( 37.05 )	0.64 ( 0.57 )	-0.64 ( -0.86 )	no	no	no	no
HEPATOBILIARY DISORDERS	24495	3359129	79	5474	24416	3329160	1.97	1.58	2.46	1.95	1.73	2.17	36.95	1.95	1.62	0.96	82937.9	0.946828	0.026475	0.162711	0.621405	0.64	1.97 ( 1.58 - 2.46 )	1.95 ( 36.95 )	1.95 ( 1.62 )	0.96 ( 0.64 )	yes	no	no	yes
NEOPLASMS BENIGN, MALIGNANT AND UNSPECIFIED (INCL CYSTS AND POLYPS)	58326	3359129	396	5157	57930	3295646	4.37	3.94	4.84	4.13	4.03	4.22	948.83	4.11	3.77	2.04	34832	2.02658	0.00565132	0.0751753	1.87623	1.89	4.37 ( 3.94 - 4.84 )	4.13 ( 948.83 )	4.11 ( 3.77 )	2.04 ( 1.89 )	yes	yes	yes	yes
METABOLISM AND NUTRITION DISORDERS	36567	3359129	74	5479	36493	3317083	1.23	0.98	1.54	1.22	1	1.45	3.08	1.22	1.01	0.29	55558	0.287204	0.0281814	0.167873	-0.0485419	-0.04	1.23 ( 0.98 - 1.54 )	1.22 ( 3.08 )	1.22 ( 1.01 )	0.29 ( -0.04 )	no	no	no	no
CARDIAC DISORDERS	51085	3359129	161	5392	50924	3302652	1.94	1.66	2.27	1.91	1.76	2.06	70.58	1.91	1.67	0.93	39769.1	0.922576	0.0132616	0.115159	0.692258	0.7	1.94 ( 1.66 - 2.27 )	1.91 ( 70.58 )	1.91 ( 1.67 )	0.93 ( 0.7 )	yes	no	no	yes
EYE DISORDERS	45913	3359129	71	5482	45842	3307734	0.93	0.74	1.18	0.94	0.7	1.17	0.32	0.94	0.77	-0.1	44248.9	-0.0952556	0.0293261	0.171249	-0.437753	-0.44	0.93 ( 0.74 - 1.18 )	0.94 ( 0.32 )	0.94 ( 0.77 )	-0.1 ( -0.44 )	no	no	no	no
GASTROINTESTINAL DISORDERS	218894	3359129	419	5134	218475	3135101	1.17	1.06	1.29	1.16	1.07	1.25	9.67	1.16	1.07	0.21	9281.37	0.210731	0.00533804	0.0730619	0.0646076	0.07	1.17 ( 1.06 - 1.29 )	1.16 ( 9.67 )	1.16 ( 1.07 )	0.21 ( 0.07 )	yes	no	no	yes
PSYCHIATRIC DISORDERS	69732	3359129	93	5460	69639	3283937	0.8	0.65	0.99	0.81	0.6	1.01	4.4	0.81	0.68	-0.31	29134.6	-0.307078	0.022545	0.15015	-0.607378	-0.61	0.8 ( 0.65 - 0.99 )	0.81 ( 4.4 )	0.81 ( 0.68 )	-0.31 ( -0.61 )	no	no	no	no
REPRODUCTIVE SYSTEM AND BREAST DISORDERS	10830	3359129	20	5533	10810	3342766	1.12	0.72	1.73	1.12	0.68	1.56	0.25	1.12	0.77	0.16	187577	0.151392	0.0996779	0.315718	-0.480044	-0.47	1.12 ( 0.72 - 1.73 )	1.12 ( 0.25 )	1.12 ( 0.77 )	0.16 ( -0.47 )	no	no	no	no
EAR AND LABYRINTH DISORDERS	13889	3359129	25	5528	13864	3339712	1.09	0.74	1.61	1.09	0.7	1.48	0.18	1.09	0.78	0.12	146267	0.117537	0.0805754	0.283858	-0.450179	-0.44	1.09 ( 0.74 - 1.61 )	1.09 ( 0.18 )	1.09 ( 0.78 )	0.12 ( -0.44 )	no	no	no	no
SURGICAL AND MEDICAL PROCEDURES	68583	3359129	207	5346	68376	3285200	1.86	1.62	2.14	1.83	1.69	1.96	79.06	1.83	1.63	0.87	29622.7	0.862535	0.0104098	0.102029	0.658477	0.66	1.86 ( 1.62 - 2.14 )	1.83 ( 79.06 )	1.83 ( 1.63 )	0.87 ( 0.66 )	yes	no	no	yes
IMMUNE SYSTEM DISORDERS	46720	3359129	41	5512	46679	3306897	0.53	0.39	0.72	0.53	0.23	0.84	17.27	0.53	0.41	-0.91	43484.6	-0.897676	0.0499738	0.223548	-1.34477	-1.36	0.53 ( 0.39 - 0.72 )	0.53 ( 17.27 )	0.53 ( 0.41 )	-0.91 ( -1.36 )	no	no	no	no
SOCIAL CIRCUMSTANCES	16575	3359129	9	5544	16566	3337010	0.33	0.17	0.63	0.33	-0.32	0.98	12.44	0.33	0.19	-1.61	122566	-1.50624	0.208635	0.456766	-2.41977	-2.52	0.33 ( 0.17 - 0.63 )	0.33 ( 12.44 )	0.33 ( 0.19 )	-1.61 ( -2.52 )	no	no	no	no
PRODUCT ISSUES	23456	3359129	3	5550	23453	3330123	0.08	0.02	0.24	0.08	-1.05	1.21	33.29	0.08	0.03	-3.69	86611.5	-3.31411	0.520804	0.721667	-4.75745	-5.14	0.08 ( 0.02 - 0.24 )	0.08 ( 33.29 )	0.08 ( 0.03 )	-3.69 ( -5.14 )	no	no	no	no
CONGENITAL, FAMILIAL AND GENETIC DISORDERS	2078	3359129	6	5547	2072	3351504	1.75	0.78	3.9	1.75	0.95	2.55	1.92	1.75	0.89	0.8	977223	0.657632	0.298712	0.546546	-0.43546	-0.29	1.75 ( 0.78 - 3.9 )	1.75 ( 1.92 )	1.75 ( 0.89 )	0.8 ( -0.29 )	no	no	no	no
ENDOCRINE DISORDERS	4948	3359129	4	5549	4944	3348632	0.49	0.18	1.3	0.49	-0.49	1.47	2.14	0.49	0.22	-1.03	410516	-0.876989	0.417067	0.645807	-2.1686	-2.32	0.49 ( 0.18 - 1.3 )	0.49 ( 2.14 )	0.49 ( 0.22 )	-1.03 ( -2.32 )	no	no	no	no
PREGNANCY, PUERPERIUM AND PERINATAL CONDITIONS	6389	3359129	3	5550	6386	3347190	0.28	0.09	0.88	0.28	-0.85	1.42	5.43	0.28	0.11	-1.82	317941	-1.53172	0.521041	0.721832	-2.97539	-3.26	0.28 ( 0.09 - 0.88 )	0.28 ( 5.43 )	0.28 ( 0.11 )	-1.82 ( -3.26 )	no	no	no	no

## Sheet: Sheet2
soc_name	Case number	χ2	ROR(95%Cl)	PRR(95%Cl)	EBGM(EBGM05)	IC(IC025)	Determine whether it is a positive signal according to the ROR algorithm(lower limit of 95% CI>1, a≥3)	Determine whether it is a positive signal according to the PRR algorithm(PRR≥2, χ2≥4, a≥3)	Determine whether it is a positive signal according to the MGPS algorithm(EBGM05>2)	Determine whether it is a positive signal according to the BCPNN algorithm(IC025>0)
INFECTIONS AND INFESTATIONS	1097	641.88	2.3 ( 2.15 - 2.45 )	2.04 ( 641.88 )	2.04 ( 1.93 )	1.03 ( 0.93 )	yes	yes	no	yes
NERVOUS SYSTEM DISORDERS	386	41.25	1.4 ( 1.26 - 1.55 )	1.37 ( 41.25 )	1.37 ( 1.26 )	0.46 ( 0.31 )	yes	no	no	yes
RESPIRATORY, THORACIC AND MEDIASTINAL DISORDERS	407	81.3	1.59 ( 1.43 - 1.75 )	1.54 ( 81.3 )	1.54 ( 1.42 )	0.62 ( 0.48 )	yes	no	no	yes
BLOOD AND LYMPHATIC SYSTEM DISORDERS	131	150.83	2.83 ( 2.38 - 3.37 )	2.79 ( 150.83 )	2.78 ( 2.4 )	1.48 ( 1.22 )	yes	yes	yes	yes
INVESTIGATIONS	286	0.85	0.95 ( 0.84 - 1.07 )	0.95 ( 0.85 )	0.95 ( 0.86 )	-0.08 ( -0.25 )	no	no	no	no
VASCULAR DISORDERS	206	169.13	2.45 ( 2.13 - 2.81 )	2.39 ( 169.13 )	2.39 ( 2.13 )	1.26 ( 1.05 )	yes	yes	yes	yes
RENAL AND URINARY DISORDERS	90	36.88	1.89 ( 1.53 - 2.33 )	1.87 ( 36.88 )	1.87 ( 1.57 )	0.9 ( 0.6 )	yes	no	no	yes
GENERAL DISORDERS AND ADMINISTRATION SITE CONDITIONS	586	510.76	0.39 ( 0.35 - 0.42 )	0.45 ( 510.76 )	0.45 ( 0.42 )	-1.15 ( -1.27 )	no	no	no	no
INJURY, POISONING AND PROCEDURAL COMPLICATIONS	256	84.11	0.56 ( 0.49 - 0.64 )	0.58 ( 84.11 )	0.58 ( 0.52 )	-0.78 ( -0.97 )	no	no	no	no
MUSCULOSKELETAL AND CONNECTIVE TISSUE DISORDERS	320	355.28	0.35 ( 0.32 - 0.4 )	0.39 ( 355.28 )	0.39 ( 0.36 )	-1.35 ( -1.52 )	no	no	no	no
SKIN AND SUBCUTANEOUS TISSUE DISORDERS	177	37.05	0.63 ( 0.54 - 0.73 )	0.64 ( 37.05 )	0.64 ( 0.57 )	-0.64 ( -0.86 )	no	no	no	no
HEPATOBILIARY DISORDERS	79	36.95	1.97 ( 1.58 - 2.46 )	1.95 ( 36.95 )	1.95 ( 1.62 )	0.96 ( 0.64 )	yes	no	no	yes
NEOPLASMS BENIGN, MALIGNANT AND UNSPECIFIED (INCL CYSTS AND POLYPS)	396	948.83	4.37 ( 3.94 - 4.84 )	4.13 ( 948.83 )	4.11 ( 3.77 )	2.04 ( 1.89 )	yes	yes	yes	yes
METABOLISM AND NUTRITION DISORDERS	74	3.08	1.23 ( 0.98 - 1.54 )	1.22 ( 3.08 )	1.22 ( 1.01 )	0.29 ( -0.04 )	no	no	no	no
CARDIAC DISORDERS	161	70.58	1.94 ( 1.66 - 2.27 )	1.91 ( 70.58 )	1.91 ( 1.67 )	0.93 ( 0.7 )	yes	no	no	yes
EYE DISORDERS	71	0.32	0.93 ( 0.74 - 1.18 )	0.94 ( 0.32 )	0.94 ( 0.77 )	-0.1 ( -0.44 )	no	no	no	no
GASTROINTESTINAL DISORDERS	419	9.67	1.17 ( 1.06 - 1.29 )	1.16 ( 9.67 )	1.16 ( 1.07 )	0.21 ( 0.07 )	yes	no	no	yes
PSYCHIATRIC DISORDERS	93	4.4	0.8 ( 0.65 - 0.99 )	0.81 ( 4.4 )	0.81 ( 0.68 )	-0.31 ( -0.61 )	no	no	no	no
REPRODUCTIVE SYSTEM AND BREAST DISORDERS	20	0.25	1.12 ( 0.72 - 1.73 )	1.12 ( 0.25 )	1.12 ( 0.77 )	0.16 ( -0.47 )	no	no	no	no
EAR AND LABYRINTH DISORDERS	25	0.18	1.09 ( 0.74 - 1.61 )	1.09 ( 0.18 )	1.09 ( 0.78 )	0.12 ( -0.44 )	no	no	no	no
SURGICAL AND MEDICAL PROCEDURES	207	79.06	1.86 ( 1.62 - 2.14 )	1.83 ( 79.06 )	1.83 ( 1.63 )	0.87 ( 0.66 )	yes	no	no	yes
IMMUNE SYSTEM DISORDERS	41	17.27	0.53 ( 0.39 - 0.72 )	0.53 ( 17.27 )	0.53 ( 0.41 )	-0.91 ( -1.36 )	no	no	no	no
SOCIAL CIRCUMSTANCES	9	12.44	0.33 ( 0.17 - 0.63 )	0.33 ( 12.44 )	0.33 ( 0.19 )	-1.61 ( -2.52 )	no	no	no	no
PRODUCT ISSUES	3	33.29	0.08 ( 0.02 - 0.24 )	0.08 ( 33.29 )	0.08 ( 0.03 )	-3.69 ( -5.14 )	no	no	no	no
CONGENITAL, FAMILIAL AND GENETIC DISORDERS	6	1.92	1.75 ( 0.78 - 3.9 )	1.75 ( 1.92 )	1.75 ( 0.89 )	0.8 ( -0.29 )	no	no	no	no
ENDOCRINE DISORDERS	4	2.14	0.49 ( 0.18 - 1.3 )	0.49 ( 2.14 )	0.49 ( 0.22 )	-1.03 ( -2.32 )	no	no	no	no
PREGNANCY, PUERPERIUM AND PERINATAL CONDITIONS	3	5.43	0.28 ( 0.09 - 0.88 )	0.28 ( 5.43 )	0.28 ( 0.11 )	-1.82 ( -3.26 )	no	no	no	no

## Sheet: Sheet3
									Journal name:Naunyn-Schmiedeberg's Archives of Pharmacology
									Article title:Systematic analysis of adverse reaction signals induced by Leflunomide, Upadacitinib, and Baricitinib in the treatment of rheumatoid arthritis using the FAERS database
									Author names:Jizheng Danga,Li Shua*
									aDepartment of Pharmacy, University-Town Hospital of Chongqing Medical University, Chongqing, China
									E-mail addresses: 800321@hospital.cqmu.edu.cn (Jizheng Dang), shuli1986@hospital.cqmu.edu.cn (Li Shu).
									Corresponding Author:Li Shu
									E-mail addresses:shuli1986@hospital.cqmu.edu.cn
