# Supplementary material for: Systematic analysis of adverse reaction signals induced by Leflunomide, Upadacitinib, and Baricitinib in the treatment of rheumatoid arthritis using the FAERS database
Source: Research Square preprint supplement (doi:10.21203/rs.3.rs-7331453/v1), 2025-08-21
Supplement: Supplementary file 3 [file 462deb575ef274db42d35150.xlsx]

## Sheet: Sheet 1
soc_name_en	ac	n	a	b	c	d	ROR	RORL	RORU	PRR	PRRL	PRRU	XX	EBGM	EBGM05	IC	GMAE	EIC	VIC	SD	BCPNN250	IC025	ROR(95%Cl)	PRR(Chi-square value)	EBGM(EBGM05)	IC(IC025)	Determine whether it is a positive signal according to the ROR algorithm(lower limit of 95% CI>1, a≥3)	Determine whether it is a positive signal according to the PRR algorithm(PRR≥2, χ2≥4, a≥3)	Determine whether it is a positive signal according to the MGPS algorithm(EBGM05>2)	Determine whether it is a positive signal according to the BCPNN algorithm(IC025>0)
RESPIRATORY, THORACIC AND MEDIASTINAL DISORDERS	159768	3359129	3160	87403	156608	3111958	0.72	0.69	0.74	0.73	0.69	0.76	329.79	0.73	0.71	-0.45	779.84	-0.44679	0.000692604	0.0263174	-0.499425	-0.5	0.72 ( 0.69 - 0.74 )	0.73 ( 329.79 )	0.73 ( 0.71 )	-0.45 ( -0.5 )	no	no	no	no
NEOPLASMS BENIGN, MALIGNANT AND UNSPECIFIED (INCL CYSTS AND POLYPS)	58326	3359129	815	89748	57511	3211055	0.51	0.47	0.54	0.51	0.44	0.58	381.63	0.52	0.49	-0.95	2136.13	-0.947361	0.00260751	0.0510637	-1.04949	-1.05	0.51 ( 0.47 - 0.54 )	0.51 ( 381.63 )	0.52 ( 0.49 )	-0.95 ( -1.05 )	no	no	no	no
INJURY, POISONING AND PROCEDURAL COMPLICATIONS	266501	3359129	6764	83799	259737	3008829	0.94	0.91	0.96	0.94	0.92	0.96	27.53	0.94	0.92	-0.09	467.517	-0.087106	0.000336601	0.0183467	-0.123799	-0.12	0.94 ( 0.91 - 0.96 )	0.94 ( 27.53 )	0.94 ( 0.92 )	-0.09 ( -0.12 )	no	no	no	no
NERVOUS SYSTEM DISORDERS	170078	3359129	2928	87635	167150	3101416	0.62	0.6	0.64	0.63	0.6	0.67	648.47	0.64	0.62	-0.65	732.567	-0.64696	0.000743968	0.0272758	-0.701512	-0.7	0.62 ( 0.6 - 0.64 )	0.63 ( 648.47 )	0.64 ( 0.62 )	-0.65 ( -0.7 )	no	no	no	no
PSYCHIATRIC DISORDERS	69732	3359129	2017	88546	67715	3200851	1.08	1.03	1.13	1.08	1.03	1.12	10.48	1.07	1.03	0.1	1786.73	0.101397	0.00108237	0.0328994	0.0355979	0.04	1.08 ( 1.03 - 1.13 )	1.08 ( 10.48 )	1.07 ( 1.03 )	0.1 ( 0.04 )	yes	no	no	yes
GENERAL DISORDERS AND ADMINISTRATION SITE CONDITIONS	785303	3359129	20808	69755	764495	2504071	0.98	0.96	0.99	0.98	0.97	0.99	8.39	0.98	0.97	-0.03	158.657	-0.0250324	0.000123796	0.0111264	-0.0472852	-0.05	0.98 ( 0.96 - 0.99 )	0.98 ( 8.39 )	0.98 ( 0.97 )	-0.03 ( -0.05 )	no	no	no	no
SKIN AND SUBCUTANEOUS TISSUE DISORDERS	166592	3359129	6372	84191	160220	3108346	1.47	1.43	1.51	1.44	1.41	1.46	851.51	1.42	1.39	0.5	747.897	0.504475	0.000360209	0.0189792	0.466517	0.47	1.47 ( 1.43 - 1.51 )	1.44 ( 851.51 )	1.42 ( 1.39 )	0.5 ( 0.47 )	yes	no	no	yes
MUSCULOSKELETAL AND CONNECTIVE TISSUE DISORDERS	494334	3359129	14568	75995	479766	2788800	1.11	1.09	1.13	1.1	1.08	1.11	139.17	1.09	1.08	0.13	252.044	0.128384	0.000168197	0.0129691	0.102446	0.1	1.11 ( 1.09 - 1.13 )	1.1 ( 139.17 )	1.09 ( 1.08 )	0.13 ( 0.1 )	yes	no	no	yes
INVESTIGATIONS	182429	3359129	7856	82707	174573	3093993	1.68	1.64	1.72	1.62	1.6	1.65	1906.81	1.6	1.57	0.68	682.971	0.675494	0.000297439	0.0172464	0.641001	0.64	1.68 ( 1.64 - 1.72 )	1.62 ( 1906.81 )	1.6 ( 1.57 )	0.68 ( 0.64 )	yes	no	no	yes
INFECTIONS AND INFESTATIONS	325864	3359129	6083	84480	319781	2948785	0.66	0.65	0.68	0.69	0.66	0.71	946.06	0.69	0.68	-0.53	382.35	-0.530267	0.000369616	0.0192254	-0.568718	-0.57	0.66 ( 0.65 - 0.68 )	0.69 ( 946.06 )	0.69 ( 0.68 )	-0.53 ( -0.57 )	no	no	no	no
GASTROINTESTINAL DISORDERS	218894	3359129	8023	82540	210871	3057695	1.41	1.38	1.44	1.37	1.35	1.39	838.47	1.36	1.33	0.44	569.197	0.442989	0.000290025	0.0170301	0.408929	0.41	1.41 ( 1.38 - 1.44 )	1.37 ( 838.47 )	1.36 ( 1.33 )	0.44 ( 0.41 )	yes	no	no	yes
EYE DISORDERS	45913	3359129	748	89815	45165	3223401	0.59	0.55	0.64	0.6	0.53	0.67	201.96	0.6	0.57	-0.73	2713.65	-0.725982	0.00284532	0.0533415	-0.832665	-0.83	0.59 ( 0.55 - 0.64 )	0.6 ( 201.96 )	0.6 ( 0.57 )	-0.73 ( -0.83 )	no	no	no	no
BLOOD AND LYMPHATIC SYSTEM DISORDERS	28505	3359129	1048	89515	27457	3241109	1.38	1.3	1.47	1.38	1.32	1.44	105.36	1.36	1.29	0.45	4370.81	0.446952	0.00207828	0.0455882	0.355776	0.36	1.38 ( 1.3 - 1.47 )	1.38 ( 105.36 )	1.36 ( 1.29 )	0.45 ( 0.36 )	yes	no	no	yes
METABOLISM AND NUTRITION DISORDERS	36567	3359129	962	89601	35605	3232961	0.97	0.91	1.04	0.98	0.91	1.04	0.6	0.98	0.92	-0.04	3407.2	-0.0353573	0.00223938	0.0473221	-0.130001	-0.13	0.97 ( 0.91 - 1.04 )	0.98 ( 0.6 )	0.98 ( 0.92 )	-0.04 ( -0.13 )	no	no	no	no
RENAL AND URINARY DISORDERS	29096	3359129	561	90002	28535	3240031	0.71	0.65	0.77	0.71	0.63	0.79	65.98	0.72	0.67	-0.48	4282.03	-0.482987	0.00379616	0.061613	-0.606213	-0.61	0.71 ( 0.65 - 0.77 )	0.71 ( 65.98 )	0.72 ( 0.67 )	-0.48 ( -0.61 )	no	no	no	no
EAR AND LABYRINTH DISORDERS	13889	3359129	259	90304	13630	3254936	0.68	0.61	0.77	0.69	0.56	0.81	36.73	0.69	0.62	-0.53	8970.07	-0.530231	0.00817624	0.0904225	-0.711076	-0.71	0.68 ( 0.61 - 0.77 )	0.69 ( 36.73 )	0.69 ( 0.62 )	-0.53 ( -0.71 )	no	no	no	no
PREGNANCY, PUERPERIUM AND PERINATAL CONDITIONS	6389	3359129	248	90315	6141	3262425	1.46	1.28	1.66	1.46	1.33	1.58	34.3	1.44	1.29	0.53	19498.3	0.523059	0.00870576	0.0933047	0.33645	0.34	1.46 ( 1.28 - 1.66 )	1.46 ( 34.3 )	1.44 ( 1.29 )	0.53 ( 0.34 )	yes	no	no	yes
REPRODUCTIVE SYSTEM AND BREAST DISORDERS	10830	3359129	89	90474	10741	3257825	0.3	0.24	0.37	0.3	0.09	0.51	145.49	0.3	0.26	-1.71	11503.5	-1.70295	0.0233396	0.152773	-2.0085	-2.02	0.3 ( 0.24 - 0.37 )	0.3 ( 145.49 )	0.3 ( 0.26 )	-1.71 ( -2.02 )	no	no	no	no
SURGICAL AND MEDICAL PROCEDURES	68583	3359129	815	89748	67768	3200798	0.43	0.4	0.46	0.43	0.37	0.5	606.66	0.44	0.42	-1.18	1816.67	-1.18093	0.00260217	0.0510115	-1.28295	-1.28	0.43 ( 0.4 - 0.46 )	0.43 ( 606.66 )	0.44 ( 0.42 )	-1.18 ( -1.28 )	no	no	no	no
HEPATOBILIARY DISORDERS	24495	3359129	1463	89100	23032	3245534	2.31	2.19	2.44	2.29	2.24	2.34	1009.84	2.22	2.12	1.15	5086.31	1.14627	0.00152779	0.039087	1.06809	1.07	2.31 ( 2.19 - 2.44 )	2.29 ( 1009.84 )	2.22 ( 2.12 )	1.15 ( 1.07 )	yes	yes	yes	yes
VASCULAR DISORDERS	52179	3359129	984	89579	51195	3217371	0.69	0.65	0.74	0.69	0.63	0.76	132.63	0.7	0.66	-0.52	2387.78	-0.515247	0.00217408	0.046627	-0.608501	-0.61	0.69 ( 0.65 - 0.74 )	0.69 ( 132.63 )	0.7 ( 0.66 )	-0.52 ( -0.61 )	no	no	no	no
CARDIAC DISORDERS	51085	3359129	1056	89507	50029	3218537	0.76	0.71	0.81	0.76	0.7	0.82	78.2	0.77	0.73	-0.38	2438.91	-0.38292	0.00203099	0.0450666	-0.473053	-0.47	0.76 ( 0.71 - 0.81 )	0.76 ( 78.2 )	0.77 ( 0.73 )	-0.38 ( -0.47 )	no	no	no	no
IMMUNE SYSTEM DISORDERS	46720	3359129	1949	88614	44771	3223795	1.58	1.51	1.66	1.57	1.53	1.62	393.27	1.55	1.49	0.63	2666.77	0.629337	0.00113304	0.0336607	0.562016	0.56	1.58 ( 1.51 - 1.66 )	1.57 ( 393.27 )	1.55 ( 1.49 )	0.63 ( 0.56 )	yes	no	no	yes
SOCIAL CIRCUMSTANCES	16575	3359129	736	89827	15839	3252727	1.68	1.56	1.81	1.68	1.6	1.75	193.21	1.65	1.55	0.72	7516.55	0.718495	0.0029708	0.054505	0.609485	0.61	1.68 ( 1.56 - 1.81 )	1.68 ( 193.21 )	1.65 ( 1.55 )	0.72 ( 0.61 )	yes	no	no	yes
PRODUCT ISSUES	23456	3359129	40	90523	23416	3245150	0.06	0.04	0.08	0.06	-0.25	0.37	574.3	0.06	0.05	-3.98	5311.61	-3.94945	0.050875	0.225555	-4.40056	-4.43	0.06 ( 0.04 - 0.08 )	0.06 ( 574.3 )	0.06 ( 0.05 )	-3.98 ( -4.43 )	no	no	no	no
ENDOCRINE DISORDERS	4948	3359129	93	90470	4855	3263711	0.69	0.56	0.85	0.69	0.49	0.9	12.59	0.7	0.59	-0.52	25175.7	-0.516097	0.0225839	0.150279	-0.816656	-0.82	0.69 ( 0.56 - 0.85 )	0.69 ( 12.59 )	0.7 ( 0.59 )	-0.52 ( -0.82 )	no	no	no	no
CONGENITAL, FAMILIAL AND GENETIC DISORDERS	2078	3359129	118	90445	1960	3266606	2.17	1.81	2.62	2.17	1.99	2.36	70.51	2.11	1.8	1.07	59929.9	1.06064	0.0185128	0.136062	0.788516	0.8	2.17 ( 1.81 - 2.62 )	2.17 ( 70.51 )	2.11 ( 1.8 )	1.07 ( 0.8 )	yes	yes	no	yes

## Sheet: Sheet2
soc_name	Case number	χ2	ROR(95%Cl)	PRR(95%Cl)	EBGM(EBGM05)	IC(IC025)	Determine whether it is a positive signal according to the ROR algorithm(lower limit of 95% CI>1, a≥3)	Determine whether it is a positive signal according to the PRR algorith(PRR≥2, χ2≥4, a≥3)	Determine whether it is a positive signal according to the MGPS algorithm(EBGM05>2)	Determine whether it is a positive signal according to the BCPNN algorithm(IC025>0)
RESPIRATORY, THORACIC AND MEDIASTINAL DISORDERS	3160	329.79	0.72 ( 0.69 - 0.74 )	0.73 ( 329.79 )	0.73 ( 0.71 )	-0.45 ( -0.5 )	no	no	no	no
NEOPLASMS BENIGN, MALIGNANT AND UNSPECIFIED (INCL CYSTS AND POLYPS)	815	381.63	0.51 ( 0.47 - 0.54 )	0.51 ( 381.63 )	0.52 ( 0.49 )	-0.95 ( -1.05 )	no	no	no	no
INJURY, POISONING AND PROCEDURAL COMPLICATIONS	6764	27.53	0.94 ( 0.91 - 0.96 )	0.94 ( 27.53 )	0.94 ( 0.92 )	-0.09 ( -0.12 )	no	no	no	no
NERVOUS SYSTEM DISORDERS	2928	648.47	0.62 ( 0.6 - 0.64 )	0.63 ( 648.47 )	0.64 ( 0.62 )	-0.65 ( -0.7 )	no	no	no	no
PSYCHIATRIC DISORDERS	2017	10.48	1.08 ( 1.03 - 1.13 )	1.08 ( 10.48 )	1.07 ( 1.03 )	0.1 ( 0.04 )	yes	no	no	yes
GENERAL DISORDERS AND ADMINISTRATION SITE CONDITIONS	20808	8.39	0.98 ( 0.96 - 0.99 )	0.98 ( 8.39 )	0.98 ( 0.97 )	-0.03 ( -0.05 )	no	no	no	no
SKIN AND SUBCUTANEOUS TISSUE DISORDERS	6372	851.51	1.47 ( 1.43 - 1.51 )	1.44 ( 851.51 )	1.42 ( 1.39 )	0.5 ( 0.47 )	yes	no	no	yes
MUSCULOSKELETAL AND CONNECTIVE TISSUE DISORDERS	14568	139.17	1.11 ( 1.09 - 1.13 )	1.1 ( 139.17 )	1.09 ( 1.08 )	0.13 ( 0.1 )	yes	no	no	yes
INVESTIGATIONS	7856	1906.81	1.68 ( 1.64 - 1.72 )	1.62 ( 1906.81 )	1.6 ( 1.57 )	0.68 ( 0.64 )	yes	no	no	yes
INFECTIONS AND INFESTATIONS	6083	946.06	0.66 ( 0.65 - 0.68 )	0.69 ( 946.06 )	0.69 ( 0.68 )	-0.53 ( -0.57 )	no	no	no	no
GASTROINTESTINAL DISORDERS	8023	838.47	1.41 ( 1.38 - 1.44 )	1.37 ( 838.47 )	1.36 ( 1.33 )	0.44 ( 0.41 )	yes	no	no	yes
EYE DISORDERS	748	201.96	0.59 ( 0.55 - 0.64 )	0.6 ( 201.96 )	0.6 ( 0.57 )	-0.73 ( -0.83 )	no	no	no	no
BLOOD AND LYMPHATIC SYSTEM DISORDERS	1048	105.36	1.38 ( 1.3 - 1.47 )	1.38 ( 105.36 )	1.36 ( 1.29 )	0.45 ( 0.36 )	yes	no	no	yes
METABOLISM AND NUTRITION DISORDERS	962	0.6	0.97 ( 0.91 - 1.04 )	0.98 ( 0.6 )	0.98 ( 0.92 )	-0.04 ( -0.13 )	no	no	no	no
RENAL AND URINARY DISORDERS	561	65.98	0.71 ( 0.65 - 0.77 )	0.71 ( 65.98 )	0.72 ( 0.67 )	-0.48 ( -0.61 )	no	no	no	no
EAR AND LABYRINTH DISORDERS	259	36.73	0.68 ( 0.61 - 0.77 )	0.69 ( 36.73 )	0.69 ( 0.62 )	-0.53 ( -0.71 )	no	no	no	no
PREGNANCY, PUERPERIUM AND PERINATAL CONDITIONS	248	34.3	1.46 ( 1.28 - 1.66 )	1.46 ( 34.3 )	1.44 ( 1.29 )	0.53 ( 0.34 )	yes	no	no	yes
REPRODUCTIVE SYSTEM AND BREAST DISORDERS	89	145.49	0.3 ( 0.24 - 0.37 )	0.3 ( 145.49 )	0.3 ( 0.26 )	-1.71 ( -2.02 )	no	no	no	no
SURGICAL AND MEDICAL PROCEDURES	815	606.66	0.43 ( 0.4 - 0.46 )	0.43 ( 606.66 )	0.44 ( 0.42 )	-1.18 ( -1.28 )	no	no	no	no
HEPATOBILIARY DISORDERS	1463	1009.84	2.31 ( 2.19 - 2.44 )	2.29 ( 1009.84 )	2.22 ( 2.12 )	1.15 ( 1.07 )	yes	yes	yes	yes
VASCULAR DISORDERS	984	132.63	0.69 ( 0.65 - 0.74 )	0.69 ( 132.63 )	0.7 ( 0.66 )	-0.52 ( -0.61 )	no	no	no	no
CARDIAC DISORDERS	1056	78.2	0.76 ( 0.71 - 0.81 )	0.76 ( 78.2 )	0.77 ( 0.73 )	-0.38 ( -0.47 )	no	no	no	no
IMMUNE SYSTEM DISORDERS	1949	393.27	1.58 ( 1.51 - 1.66 )	1.57 ( 393.27 )	1.55 ( 1.49 )	0.63 ( 0.56 )	yes	no	no	yes
SOCIAL CIRCUMSTANCES	736	193.21	1.68 ( 1.56 - 1.81 )	1.68 ( 193.21 )	1.65 ( 1.55 )	0.72 ( 0.61 )	yes	no	no	yes
PRODUCT ISSUES	40	574.3	0.06 ( 0.04 - 0.08 )	0.06 ( 574.3 )	0.06 ( 0.05 )	-3.98 ( -4.43 )	no	no	no	no
ENDOCRINE DISORDERS	93	12.59	0.69 ( 0.56 - 0.85 )	0.69 ( 12.59 )	0.7 ( 0.59 )	-0.52 ( -0.82 )	no	no	no	no
CONGENITAL, FAMILIAL AND GENETIC DISORDERS	118	70.51	2.17 ( 1.81 - 2.62 )	2.17 ( 70.51 )	2.11 ( 1.8 )	1.07 ( 0.8 )	yes	yes	no	yes

## Sheet: Sheet3
									Journal name:Naunyn-Schmiedeberg's Archives of Pharmacology
									Article title:Systematic analysis of adverse reaction signals induced by Leflunomide, Upadacitinib, and Baricitinib in the treatment of rheumatoid arthritis using the FAERS database
									Author names:Jizheng Danga,Li Shua*
									aDepartment of Pharmacy, University-Town Hospital of Chongqing Medical University, Chongqing, China
									E-mail addresses: 800321@hospital.cqmu.edu.cn (Jizheng Dang), shuli1986@hospital.cqmu.edu.cn (Li Shu).
									Corresponding Author:Li Shu
									E-mail addresses:shuli1986@hospital.cqmu.edu.cn
