# Supplementary material for: Systematic analysis of adverse reaction signals induced by Leflunomide, Upadacitinib, and Baricitinib in the treatment of rheumatoid arthritis using the FAERS database
Source: Research Square preprint supplement (doi:10.21203/rs.3.rs-7331453/v1), 2025-08-21
Supplement: Supplementary file 4 [file 728669a93d10e82caf9c83b5.docx]

**Journal name:Naunyn-Schmiedeberg's Archives of Pharmacology**

**Article title:Systematic analysis of adverse reaction signals induced by Leflunomide, Upadacitinib, and Baricitinib in the treatment of rheumatoid arthritis using the FAERS database**

Author names:Jizheng Danga,Li Shua*

aDepartment of Pharmacy, University-Town Hospital of Chongqing Medical University, Chongqing, China

E-mail addresses: 800321@hospital.cqmu.edu.cn (Jizheng Dang), shuli1986@hospital.cqmu.edu.cn (Li Shu).

Corresponding Author:Li Shu

1. mail addresses:shuli1986@hospital.cqmu.edu.cn

**Online Resource 1:** computational formula

**Online Resource 2：**Strength of reported signals (SOC level) of Baricitinib and RA in the FAERS database

**Online Resource 3：**Strength of reported signals (SOC level) for Leflunomide and RA in the FAERS database

**Online Resource 4：**Strength of reported signals (SOC level) for Upadacitinib in relation to RA in the FAERS database

**Online Resource 5：**Strength of reported signals for Baricitinib and RA in the FAERS database (PT level)

**Online Resource 6：**Strength of reported signals for Leflunomide and RA in the FAERS database (PT level)

**Online Resource 7：**Strength of reported signals for Upadacitinib and RA in the FAERS database (PT level)
