# Supplementary material for: Systematic analysis of adverse reaction signals induced by Leflunomide, Upadacitinib, and Baricitinib in the treatment of rheumatoid arthritis using the FAERS database
Source: Research Square preprint supplement (doi:10.21203/rs.3.rs-7331453/v1), 2025-08-21
Supplement: Supplementary file 5 [file 7e4ca16bf7502511b18f2868.xlsx]

## Sheet: Sheet1
pt_name	soc_name	Case number	ROR(95%Cl)	PRR(χ2)
PAIN	GENERAL DISORDERS AND ADMINISTRATION SITE CONDITIONS	2634	1.59 ( 1.53 - 1.66 )	1.57 ( 539.66 )
ARTHRALGIA	MUSCULOSKELETAL AND CONNECTIVE TISSUE DISORDERS	2201	1.21 ( 1.16 - 1.26 )	1.2 ( 73.33 )
COVID-19	INFECTIONS AND INFESTATIONS	2037	6.9 ( 6.58 - 7.24 )	6.76 ( 8567.67 )
RHEUMATOID ARTHRITIS	MUSCULOSKELETAL AND CONNECTIVE TISSUE DISORDERS	1920	1 ( 0.95 - 1.04 )	1 ( 0.04 )
PAIN IN EXTREMITY	MUSCULOSKELETAL AND CONNECTIVE TISSUE DISORDERS	1490	1.57 ( 1.49 - 1.66 )	1.56 ( 293.52 )
THERAPY INTERRUPTED	SURGICAL AND MEDICAL PROCEDURES	1184	5.45 ( 5.13 - 5.8 )	5.39 ( 3734.22 )
FALL	INJURY, POISONING AND PROCEDURAL COMPLICATIONS	1181	2.24 ( 2.11 - 2.37 )	2.22 ( 754.39 )
DRUG INEFFECTIVE	GENERAL DISORDERS AND ADMINISTRATION SITE CONDITIONS	1081	0.4 ( 0.38 - 0.43 )	0.41 ( 945.98 )
FATIGUE	GENERAL DISORDERS AND ADMINISTRATION SITE CONDITIONS	909	0.83 ( 0.78 - 0.89 )	0.83 ( 29.48 )
MUSCULOSKELETAL STIFFNESS	MUSCULOSKELETAL AND CONNECTIVE TISSUE DISORDERS	870	1.87 ( 1.75 - 2.01 )	1.87 ( 335.54 )
PERIPHERAL SWELLING	GENERAL DISORDERS AND ADMINISTRATION SITE CONDITIONS	846	1.54 ( 1.44 - 1.65 )	1.54 ( 153.53 )
SURGERY	SURGICAL AND MEDICAL PROCEDURES	841	6.37 ( 5.92 - 6.86 )	6.32 ( 3252.43 )
URINARY TRACT INFECTION	INFECTIONS AND INFESTATIONS	823	2.07 ( 1.92 - 2.22 )	2.05 ( 425.69 )
PNEUMONIA	INFECTIONS AND INFESTATIONS	804	1.21 ( 1.13 - 1.3 )	1.21 ( 28.78 )
BACK PAIN	MUSCULOSKELETAL AND CONNECTIVE TISSUE DISORDERS	749	1.82 ( 1.69 - 1.96 )	1.81 ( 262.55 )
ILLNESS	GENERAL DISORDERS AND ADMINISTRATION SITE CONDITIONS	707	4.5 ( 4.16 - 4.87 )	4.47 ( 1714.27 )
DEATH	GENERAL DISORDERS AND ADMINISTRATION SITE CONDITIONS	652	1.78 ( 1.65 - 1.93 )	1.78 ( 213.7 )
MALAISE	GENERAL DISORDERS AND ADMINISTRATION SITE CONDITIONS	623	0.88 ( 0.81 - 0.95 )	0.88 ( 10.24 )
KNEE ARTHROPLASTY	SURGICAL AND MEDICAL PROCEDURES	618	4.22 ( 3.88 - 4.58 )	4.19 ( 1361.5 )
HEADACHE	NERVOUS SYSTEM DISORDERS	600	0.67 ( 0.62 - 0.73 )	0.67 ( 95.28 )
JOINT SWELLING	MUSCULOSKELETAL AND CONNECTIVE TISSUE DISORDERS	588	0.59 ( 0.55 - 0.64 )	0.6 ( 160.12 )
NASOPHARYNGITIS	INFECTIONS AND INFESTATIONS	570	0.81 ( 0.75 - 0.89 )	0.82 ( 23.3 )
DYSPNOEA	RESPIRATORY, THORACIC AND MEDIASTINAL DISORDERS	528	0.98 ( 0.9 - 1.07 )	0.98 ( 0.24 )
GAIT DISTURBANCE	GENERAL DISORDERS AND ADMINISTRATION SITE CONDITIONS	523	1.36 ( 1.25 - 1.48 )	1.36 ( 48.02 )
MOBILITY DECREASED	MUSCULOSKELETAL AND CONNECTIVE TISSUE DISORDERS	499	1.6 ( 1.47 - 1.75 )	1.6 ( 108.31 )
INFLUENZA	INFECTIONS AND INFESTATIONS	487	1.52 ( 1.38 - 1.66 )	1.51 ( 81.99 )
HERPES ZOSTER	INFECTIONS AND INFESTATIONS	486	2.03 ( 1.85 - 2.22 )	2.02 ( 239.31 )
NAUSEA	GASTROINTESTINAL DISORDERS	470	0.62 ( 0.56 - 0.68 )	0.62 ( 108.34 )
SINUSITIS	INFECTIONS AND INFESTATIONS	469	0.88 ( 0.81 - 0.97 )	0.88 ( 7.08 )
ARTHRITIS	MUSCULOSKELETAL AND CONNECTIVE TISSUE DISORDERS	466	1.5 ( 1.37 - 1.64 )	1.5 ( 73.93 )
CATARACT	EYE DISORDERS	466	3.24 ( 2.95 - 3.56 )	3.23 ( 664.27 )
COUGH	RESPIRATORY, THORACIC AND MEDIASTINAL DISORDERS	454	0.89 ( 0.81 - 0.97 )	0.89 ( 6.49 )
INFECTION	INFECTIONS AND INFESTATIONS	452	0.92 ( 0.84 - 1.01 )	0.92 ( 2.8 )
SPINAL OPERATION	SURGICAL AND MEDICAL PROCEDURES	432	11.71 ( 10.51 - 13.04 )	11.65 ( 3249.67 )
LOSS OF PERSONAL INDEPENDENCE IN DAILY ACTIVITIES	SOCIAL CIRCUMSTANCES	431	2.4 ( 2.17 - 2.64 )	2.39 ( 329.3 )
DIZZINESS	NERVOUS SYSTEM DISORDERS	430	1.01 ( 0.92 - 1.11 )	1.01 ( 0.06 )
OSTEOARTHRITIS	MUSCULOSKELETAL AND CONNECTIVE TISSUE DISORDERS	421	1.59 ( 1.44 - 1.76 )	1.59 ( 88.87 )
ASTHENIA	GENERAL DISORDERS AND ADMINISTRATION SITE CONDITIONS	410	1.11 ( 1.01 - 1.22 )	1.11 ( 4.32 )
DIARRHOEA	GASTROINTESTINAL DISORDERS	371	0.66 ( 0.59 - 0.73 )	0.66 ( 65.37 )
PYREXIA	GENERAL DISORDERS AND ADMINISTRATION SITE CONDITIONS	368	0.74 ( 0.67 - 0.83 )	0.75 ( 31.62 )
UNEVALUABLE EVENT	GENERAL DISORDERS AND ADMINISTRATION SITE CONDITIONS	354	3.8 ( 3.4 - 4.24 )	3.78 ( 662.68 )
ARTHROPATHY	MUSCULOSKELETAL AND CONNECTIVE TISSUE DISORDERS	344	0.77 ( 0.69 - 0.86 )	0.77 ( 22.77 )
INFLAMMATION	GENERAL DISORDERS AND ADMINISTRATION SITE CONDITIONS	339	1.49 ( 1.34 - 1.67 )	1.49 ( 53.15 )
VOMITING	GASTROINTESTINAL DISORDERS	335	0.8 ( 0.72 - 0.9 )	0.81 ( 15.52 )
HIP ARTHROPLASTY	SURGICAL AND MEDICAL PROCEDURES	316	3.41 ( 3.04 - 3.82 )	3.4 ( 493.15 )
CHEST PAIN	GENERAL DISORDERS AND ADMINISTRATION SITE CONDITIONS	308	1.39 ( 1.24 - 1.55 )	1.38 ( 31.85 )
SWELLING	GENERAL DISORDERS AND ADMINISTRATION SITE CONDITIONS	300	0.75 ( 0.67 - 0.84 )	0.75 ( 24.73 )
HYPERTENSION	VASCULAR DISORDERS	295	0.89 ( 0.79 - 0.99 )	0.89 ( 4.23 )
JOINT RANGE OF MOTION DECREASED	MUSCULOSKELETAL AND CONNECTIVE TISSUE DISORDERS	288	2.77 ( 2.46 - 3.12 )	2.76 ( 302.81 )
KNEE OPERATION	SURGICAL AND MEDICAL PROCEDURES	286	7.77 ( 6.84 - 8.82 )	7.74 ( 1405.22 )
HYPOAESTHESIA	NERVOUS SYSTEM DISORDERS	285	1.11 ( 0.99 - 1.25 )	1.11 ( 3.23 )
CEREBROVASCULAR ACCIDENT	NERVOUS SYSTEM DISORDERS	281	1.92 ( 1.7 - 2.17 )	1.92 ( 118.12 )
GAIT INABILITY	GENERAL DISORDERS AND ADMINISTRATION SITE CONDITIONS	275	2.63 ( 2.33 - 2.97 )	2.63 ( 260.19 )
MUSCULOSKELETAL DISORDER	MUSCULOSKELETAL AND CONNECTIVE TISSUE DISORDERS	267	3.37 ( 2.97 - 3.82 )	3.36 ( 408.86 )
WEIGHT INCREASED	INVESTIGATIONS	267	0.79 ( 0.7 - 0.9 )	0.79 ( 13.93 )
THERAPEUTIC PRODUCT EFFECT INCOMPLETE	GENERAL DISORDERS AND ADMINISTRATION SITE CONDITIONS	267	1.51 ( 1.34 - 1.71 )	1.51 ( 44.84 )
BLOOD CHOLESTEROL INCREASED	INVESTIGATIONS	260	1.72 ( 1.52 - 1.95 )	1.72 ( 74.83 )
WEIGHT DECREASED	INVESTIGATIONS	257	0.78 ( 0.69 - 0.88 )	0.78 ( 15.92 )
RASH	SKIN AND SUBCUTANEOUS TISSUE DISORDERS	256	0.37 ( 0.33 - 0.42 )	0.37 ( 273.72 )
BRONCHITIS	INFECTIONS AND INFESTATIONS	254	0.9 ( 0.8 - 1.02 )	0.9 ( 2.51 )
LOSS OF CONSCIOUSNESS	NERVOUS SYSTEM DISORDERS	249	2.39 ( 2.11 - 2.72 )	2.39 ( 189.89 )
MYOCARDIAL INFARCTION	CARDIAC DISORDERS	240	1.41 ( 1.24 - 1.61 )	1.41 ( 27.65 )
THROMBOSIS	VASCULAR DISORDERS	239	2.65 ( 2.33 - 3.03 )	2.65 ( 230.21 )
HOSPITALISATION	SURGICAL AND MEDICAL PROCEDURES	238	2.51 ( 2.2 - 2.86 )	2.51 ( 202.88 )
MUSCLE SPASMS	MUSCULOSKELETAL AND CONNECTIVE TISSUE DISORDERS	232	1.39 ( 1.22 - 1.58 )	1.39 ( 24.21 )
FEELING ABNORMAL	GENERAL DISORDERS AND ADMINISTRATION SITE CONDITIONS	230	1.04 ( 0.91 - 1.18 )	1.04 ( 0.3 )
THERAPEUTIC PRODUCT EFFECT DECREASED	GENERAL DISORDERS AND ADMINISTRATION SITE CONDITIONS	226	0.88 ( 0.77 - 1 )	0.88 ( 3.67 )
SEPSIS	INFECTIONS AND INFESTATIONS	222	1.53 ( 1.34 - 1.75 )	1.53 ( 39.24 )
ABDOMINAL PAIN UPPER	GASTROINTESTINAL DISORDERS	221	0.91 ( 0.79 - 1.04 )	0.91 ( 2.09 )
ANAEMIA	BLOOD AND LYMPHATIC SYSTEM DISORDERS	215	1.41 ( 1.23 - 1.62 )	1.41 ( 24.76 )
JOINT STIFFNESS	MUSCULOSKELETAL AND CONNECTIVE TISSUE DISORDERS	211	1.22 ( 1.07 - 1.4 )	1.22 ( 8.3 )
INTERVERTEBRAL DISC PROTRUSION	MUSCULOSKELETAL AND CONNECTIVE TISSUE DISORDERS	203	2.58 ( 2.24 - 2.98 )	2.58 ( 184.38 )
NEOPLASM MALIGNANT	NEOPLASMS BENIGN, MALIGNANT AND UNSPECIFIED (INCL CYSTS AND POLYPS)	203	2.31 ( 2 - 2.66 )	2.3 ( 141.59 )
NEPHROLITHIASIS	RENAL AND URINARY DISORDERS	201	2.25 ( 1.95 - 2.6 )	2.25 ( 132.12 )
ABDOMINAL PAIN	GASTROINTESTINAL DISORDERS	200	0.99 ( 0.86 - 1.14 )	0.99 ( 0.03 )
CONTUSION	INJURY, POISONING AND PROCEDURAL COMPLICATIONS	199	0.8 ( 0.7 - 0.92 )	0.8 ( 9.52 )
SYSTEMIC LUPUS ERYTHEMATOSUS	MUSCULOSKELETAL AND CONNECTIVE TISSUE DISORDERS	196	0.73 ( 0.63 - 0.84 )	0.73 ( 19.08 )
SKIN CANCER	NEOPLASMS BENIGN, MALIGNANT AND UNSPECIFIED (INCL CYSTS AND POLYPS)	194	3.63 ( 3.14 - 4.21 )	3.63 ( 338.53 )
ACNE	SKIN AND SUBCUTANEOUS TISSUE DISORDERS	192	4.39 ( 3.78 - 5.1 )	4.38 ( 451.34 )
SARS-COV-2 TEST POSITIVE	INVESTIGATIONS	191	7.47 ( 6.4 - 8.73 )	7.46 ( 898.88 )
INSOMNIA	PSYCHIATRIC DISORDERS	189	0.78 ( 0.68 - 0.9 )	0.78 ( 11.21 )
HEPATIC ENZYME INCREASED	INVESTIGATIONS	187	0.67 ( 0.58 - 0.78 )	0.67 ( 29.45 )
STRESS	PSYCHIATRIC DISORDERS	186	1.73 ( 1.49 - 2 )	1.73 ( 54.53 )
GRIP STRENGTH DECREASED	INVESTIGATIONS	178	2.68 ( 2.31 - 3.12 )	2.68 ( 175.74 )
PARAESTHESIA	NERVOUS SYSTEM DISORDERS	177	0.93 ( 0.8 - 1.08 )	0.93 ( 0.84 )
PROCEDURAL PAIN	INJURY, POISONING AND PROCEDURAL COMPLICATIONS	176	4.56 ( 3.9 - 5.33 )	4.55 ( 437.02 )
HIP FRACTURE	INJURY, POISONING AND PROCEDURAL COMPLICATIONS	176	3.21 ( 2.75 - 3.74 )	3.21 ( 247.16 )
ALOPECIA	SKIN AND SUBCUTANEOUS TISSUE DISORDERS	173	0.4 ( 0.34 - 0.46 )	0.4 ( 156.42 )
NECK PAIN	MUSCULOSKELETAL AND CONNECTIVE TISSUE DISORDERS	173	1.21 ( 1.04 - 1.41 )	1.21 ( 6.27 )
UPPER RESPIRATORY TRACT INFECTION	INFECTIONS AND INFESTATIONS	168	0.97 ( 0.84 - 1.13 )	0.97 ( 0.12 )
LOCALISED INFECTION	INFECTIONS AND INFESTATIONS	167	1.46 ( 1.25 - 1.71 )	1.46 ( 23.63 )
GENERAL PHYSICAL HEALTH DETERIORATION	GENERAL DISORDERS AND ADMINISTRATION SITE CONDITIONS	163	1.09 ( 0.93 - 1.27 )	1.09 ( 1.09 )
OROPHARYNGEAL PAIN	RESPIRATORY, THORACIC AND MEDIASTINAL DISORDERS	162	0.69 ( 0.59 - 0.81 )	0.69 ( 21.83 )
DIVERTICULITIS	INFECTIONS AND INFESTATIONS	161	1.52 ( 1.3 - 1.78 )	1.52 ( 27.46 )
ADVERSE DRUG REACTION	GENERAL DISORDERS AND ADMINISTRATION SITE CONDITIONS	161	1.48 ( 1.27 - 1.74 )	1.48 ( 24.4 )
ABDOMINAL DISCOMFORT	GASTROINTESTINAL DISORDERS	159	0.41 ( 0.35 - 0.48 )	0.41 ( 133.58 )
FOOT OPERATION	SURGICAL AND MEDICAL PROCEDURES	155	4.6 ( 3.9 - 5.43 )	4.59 ( 390.62 )
LUNG DISORDER	RESPIRATORY, THORACIC AND MEDIASTINAL DISORDERS	151	1.16 ( 0.98 - 1.36 )	1.16 ( 3.14 )
PRURITUS	SKIN AND SUBCUTANEOUS TISSUE DISORDERS	150	0.37 ( 0.31 - 0.43 )	0.37 ( 161.92 )
CARDIAC DISORDER	CARDIAC DISORDERS	149	1.65 ( 1.4 - 1.95 )	1.65 ( 36.93 )
VISUAL IMPAIRMENT	EYE DISORDERS	148	1.23 ( 1.05 - 1.45 )	1.23 ( 6.23 )
DEHYDRATION	METABOLISM AND NUTRITION DISORDERS	148	1.75 ( 1.48 - 2.06 )	1.74 ( 45.11 )
CARPAL TUNNEL SYNDROME	NERVOUS SYSTEM DISORDERS	144	2.29 ( 1.94 - 2.71 )	2.29 ( 99.16 )
PULMONARY EMBOLISM	RESPIRATORY, THORACIC AND MEDIASTINAL DISORDERS	143	1.75 ( 1.48 - 2.07 )	1.75 ( 44.32 )
DECREASED APPETITE	METABOLISM AND NUTRITION DISORDERS	142	0.82 ( 0.7 - 0.97 )	0.82 ( 5.33 )
HYPERHIDROSIS	SKIN AND SUBCUTANEOUS TISSUE DISORDERS	142	1.26 ( 1.06 - 1.48 )	1.25 ( 7.13 )
MEMORY IMPAIRMENT	NERVOUS SYSTEM DISORDERS	142	0.9 ( 0.77 - 1.07 )	0.9 ( 1.39 )
OSTEOPOROSIS	MUSCULOSKELETAL AND CONNECTIVE TISSUE DISORDERS	142	1.39 ( 1.17 - 1.64 )	1.38 ( 14.66 )
CHILLS	GENERAL DISORDERS AND ADMINISTRATION SITE CONDITIONS	140	1.04 ( 0.88 - 1.23 )	1.04 ( 0.18 )
IMPAIRED HEALING	GENERAL DISORDERS AND ADMINISTRATION SITE CONDITIONS	140	0.76 ( 0.65 - 0.9 )	0.76 ( 10.13 )
CONSTIPATION	GASTROINTESTINAL DISORDERS	139	1.44 ( 1.22 - 1.71 )	1.44 ( 18.03 )
LIMB INJURY	INJURY, POISONING AND PROCEDURAL COMPLICATIONS	139	1.96 ( 1.65 - 2.32 )	1.95 ( 61.72 )
ATRIAL FIBRILLATION	CARDIAC DISORDERS	136	1.43 ( 1.21 - 1.7 )	1.43 ( 17.02 )
ERYTHEMA	SKIN AND SUBCUTANEOUS TISSUE DISORDERS	136	0.57 ( 0.48 - 0.67 )	0.57 ( 44.28 )
LIMB OPERATION	SURGICAL AND MEDICAL PROCEDURES	135	6.33 ( 5.28 - 7.59 )	6.32 ( 521.59 )
CONDITION AGGRAVATED	GENERAL DISORDERS AND ADMINISTRATION SITE CONDITIONS	135	0.2 ( 0.17 - 0.24 )	0.21 ( 417.23 )
MUSCULAR WEAKNESS	MUSCULOSKELETAL AND CONNECTIVE TISSUE DISORDERS	133	0.93 ( 0.79 - 1.11 )	0.93 ( 0.59 )
INTENTIONAL DOSE OMISSION	INJURY, POISONING AND PROCEDURAL COMPLICATIONS	133	2.37 ( 1.99 - 2.82 )	2.36 ( 98.76 )
DEPRESSION	PSYCHIATRIC DISORDERS	132	0.63 ( 0.53 - 0.75 )	0.63 ( 28.14 )
POST PROCEDURAL COMPLICATION	INJURY, POISONING AND PROCEDURAL COMPLICATIONS	130	3.36 ( 2.81 - 4.02 )	3.36 ( 198.37 )
THERAPY CESSATION	SURGICAL AND MEDICAL PROCEDURES	128	1.6 ( 1.34 - 1.91 )	1.6 ( 27.58 )
EAR INFECTION	INFECTIONS AND INFESTATIONS	128	1.29 ( 1.08 - 1.54 )	1.29 ( 8.17 )
CYSTITIS	INFECTIONS AND INFESTATIONS	128	1.29 ( 1.08 - 1.54 )	1.29 ( 7.97 )
CHRONIC OBSTRUCTIVE PULMONARY DISEASE	RESPIRATORY, THORACIC AND MEDIASTINAL DISORDERS	126	1.57 ( 1.32 - 1.88 )	1.57 ( 25.16 )
SHOULDER ARTHROPLASTY	SURGICAL AND MEDICAL PROCEDURES	122	6.62 ( 5.47 - 8.03 )	6.62 ( 498.31 )
BACK DISORDER	MUSCULOSKELETAL AND CONNECTIVE TISSUE DISORDERS	121	3.29 ( 2.73 - 3.96 )	3.29 ( 177.92 )
BLOOD PRESSURE INCREASED	INVESTIGATIONS	120	0.55 ( 0.46 - 0.66 )	0.55 ( 43.77 )
SHOULDER OPERATION	SURGICAL AND MEDICAL PROCEDURES	120	8.26 ( 6.79 - 10.06 )	8.25 ( 632.9 )
GASTROINTESTINAL DISORDER	GASTROINTESTINAL DISORDERS	120	0.66 ( 0.55 - 0.79 )	0.66 ( 20.35 )
ROTATOR CUFF SYNDROME	MUSCULOSKELETAL AND CONNECTIVE TISSUE DISORDERS	119	2.37 ( 1.97 - 2.85 )	2.37 ( 88.58 )
BASAL CELL CARCINOMA	NEOPLASMS BENIGN, MALIGNANT AND UNSPECIFIED (INCL CYSTS AND POLYPS)	119	1.86 ( 1.55 - 2.24 )	1.86 ( 45.46 )
KIDNEY INFECTION	INFECTIONS AND INFESTATIONS	119	1.87 ( 1.56 - 2.25 )	1.87 ( 46.12 )
SPINAL FRACTURE	INJURY, POISONING AND PROCEDURAL COMPLICATIONS	118	2.9 ( 2.41 - 3.5 )	2.9 ( 137 )
BALANCE DISORDER	NERVOUS SYSTEM DISORDERS	118	2 ( 1.66 - 2.41 )	2 ( 56.23 )
ANXIETY	PSYCHIATRIC DISORDERS	117	0.67 ( 0.56 - 0.8 )	0.67 ( 19.02 )
FOOT DEFORMITY	MUSCULOSKELETAL AND CONNECTIVE TISSUE DISORDERS	117	1.06 ( 0.88 - 1.27 )	1.06 ( 0.37 )
ROAD TRAFFIC ACCIDENT	INJURY, POISONING AND PROCEDURAL COMPLICATIONS	113	1.45 ( 1.2 - 1.75 )	1.45 ( 15.08 )
HIP SURGERY	SURGICAL AND MEDICAL PROCEDURES	113	6 ( 4.93 - 7.32 )	6 ( 408.55 )
ASTHMA	RESPIRATORY, THORACIC AND MEDIASTINAL DISORDERS	111	0.89 ( 0.74 - 1.08 )	0.89 ( 1.35 )
DIABETES MELLITUS	METABOLISM AND NUTRITION DISORDERS	111	1.01 ( 0.83 - 1.22 )	1.01 ( 0 )
DYSSTASIA	NERVOUS SYSTEM DISORDERS	109	2.6 ( 2.14 - 3.16 )	2.6 ( 100.78 )
OXYGEN SATURATION DECREASED	INVESTIGATIONS	109	1.17 ( 0.97 - 1.41 )	1.17 ( 2.57 )
COVID-19 PNEUMONIA	INFECTIONS AND INFESTATIONS	109	6.15 ( 5.02 - 7.52 )	6.14 ( 405.93 )
HAEMOGLOBIN DECREASED	INVESTIGATIONS	108	1.47 ( 1.21 - 1.78 )	1.47 ( 15.57 )
SEIZURE	NERVOUS SYSTEM DISORDERS	108	2.75 ( 2.26 - 3.34 )	2.75 ( 112.14 )
SCIATICA	NERVOUS SYSTEM DISORDERS	108	1.55 ( 1.28 - 1.88 )	1.55 ( 20.1 )
FEMUR FRACTURE	INJURY, POISONING AND PROCEDURAL COMPLICATIONS	108	1.92 ( 1.59 - 2.33 )	1.92 ( 45.69 )
MYALGIA	MUSCULOSKELETAL AND CONNECTIVE TISSUE DISORDERS	108	0.84 ( 0.69 - 1.02 )	0.84 ( 3.26 )
UPPER LIMB FRACTURE	INJURY, POISONING AND PROCEDURAL COMPLICATIONS	107	1.99 ( 1.64 - 2.42 )	1.99 ( 50.06 )
HYPERSENSITIVITY	IMMUNE SYSTEM DISORDERS	107	0.27 ( 0.22 - 0.32 )	0.27 ( 212.67 )
JOINT INJURY	INJURY, POISONING AND PROCEDURAL COMPLICATIONS	107	1.48 ( 1.22 - 1.79 )	1.48 ( 16 )
SKIN DISCOLOURATION	SKIN AND SUBCUTANEOUS TISSUE DISORDERS	105	1.61 ( 1.33 - 1.96 )	1.61 ( 23.41 )
SOMNOLENCE	NERVOUS SYSTEM DISORDERS	104	1.1 ( 0.9 - 1.33 )	1.1 ( 0.84 )
VISION BLURRED	EYE DISORDERS	104	1.19 ( 0.98 - 1.44 )	1.19 ( 2.99 )
FIBROMYALGIA	MUSCULOSKELETAL AND CONNECTIVE TISSUE DISORDERS	104	0.76 ( 0.62 - 0.92 )	0.76 ( 8.02 )
PULMONARY THROMBOSIS	RESPIRATORY, THORACIC AND MEDIASTINAL DISORDERS	103	4.32 ( 3.53 - 5.3 )	4.32 ( 236.72 )
CHEST DISCOMFORT	GENERAL DISORDERS AND ADMINISTRATION SITE CONDITIONS	101	1.08 ( 0.89 - 1.32 )	1.08 ( 0.58 )
CELLULITIS	INFECTIONS AND INFESTATIONS	100	0.79 ( 0.65 - 0.96 )	0.79 ( 5.63 )
ANKLE FRACTURE	INJURY, POISONING AND PROCEDURAL COMPLICATIONS	100	2.98 ( 2.43 - 3.65 )	2.98 ( 122.37 )
TENDON RUPTURE	INJURY, POISONING AND PROCEDURAL COMPLICATIONS	99	2.74 ( 2.24 - 3.36 )	2.74 ( 102.43 )
TREMOR	NERVOUS SYSTEM DISORDERS	99	1.1 ( 0.9 - 1.34 )	1.1 ( 0.82 )
HERNIA	GENERAL DISORDERS AND ADMINISTRATION SITE CONDITIONS	98	2.23 ( 1.82 - 2.73 )	2.23 ( 62.61 )
INTERSTITIAL LUNG DISEASE	RESPIRATORY, THORACIC AND MEDIASTINAL DISORDERS	98	0.83 ( 0.68 - 1.02 )	0.84 ( 3.13 )
LOWER LIMB FRACTURE	INJURY, POISONING AND PROCEDURAL COMPLICATIONS	98	1.75 ( 1.43 - 2.15 )	1.75 ( 30.29 )
SYNCOPE	NERVOUS SYSTEM DISORDERS	97	1.5 ( 1.22 - 1.84 )	1.5 ( 15.56 )
IMMUNODEFICIENCY	IMMUNE SYSTEM DISORDERS	96	1.44 ( 1.18 - 1.77 )	1.44 ( 12.47 )
RESPIRATORY TRACT INFECTION	INFECTIONS AND INFESTATIONS	95	1.46 ( 1.19 - 1.79 )	1.46 ( 13.26 )
STAPHYLOCOCCAL INFECTION	INFECTIONS AND INFESTATIONS	94	1.12 ( 0.91 - 1.38 )	1.12 ( 1.22 )
DYSPEPSIA	GASTROINTESTINAL DISORDERS	93	0.84 ( 0.69 - 1.03 )	0.84 ( 2.7 )
POST PROCEDURAL INFECTION	INFECTIONS AND INFESTATIONS	93	2.65 ( 2.15 - 3.27 )	2.65 ( 89.66 )
WHITE BLOOD CELL COUNT DECREASED	INVESTIGATIONS	92	0.97 ( 0.79 - 1.19 )	0.97 ( 0.11 )
SKIN DISORDER	SKIN AND SUBCUTANEOUS TISSUE DISORDERS	92	2.22 ( 1.8 - 2.74 )	2.22 ( 58.36 )
RENAL FAILURE	RENAL AND URINARY DISORDERS	91	0.99 ( 0.8 - 1.21 )	0.99 ( 0.02 )
FOOT FRACTURE	INJURY, POISONING AND PROCEDURAL COMPLICATIONS	91	1.81 ( 1.47 - 2.24 )	1.81 ( 31.78 )
PULMONARY FIBROSIS	RESPIRATORY, THORACIC AND MEDIASTINAL DISORDERS	91	0.89 ( 0.73 - 1.1 )	0.89 ( 1.11 )
HYPOTENSION	VASCULAR DISORDERS	90	0.8 ( 0.65 - 0.99 )	0.8 ( 4.2 )
RIB FRACTURE	INJURY, POISONING AND PROCEDURAL COMPLICATIONS	90	2.26 ( 1.82 - 2.79 )	2.25 ( 59.48 )
LUNG NEOPLASM MALIGNANT	NEOPLASMS BENIGN, MALIGNANT AND UNSPECIFIED (INCL CYSTS AND POLYPS)	90	1.46 ( 1.18 - 1.8 )	1.46 ( 12.61 )
BLISTER	SKIN AND SUBCUTANEOUS TISSUE DISORDERS	90	0.57 ( 0.46 - 0.7 )	0.57 ( 28.78 )
NERVE COMPRESSION	NERVOUS SYSTEM DISORDERS	90	2.65 ( 2.14 - 3.28 )	2.64 ( 86.26 )
DRUG HYPERSENSITIVITY	IMMUNE SYSTEM DISORDERS	90	0.23 ( 0.19 - 0.29 )	0.23 ( 226.41 )
JOINT DISLOCATION	INJURY, POISONING AND PROCEDURAL COMPLICATIONS	90	1.79 ( 1.45 - 2.21 )	1.79 ( 30.05 )
SQUAMOUS CELL CARCINOMA OF SKIN	NEOPLASMS BENIGN, MALIGNANT AND UNSPECIFIED (INCL CYSTS AND POLYPS)	89	8.39 ( 6.68 - 10.55 )	8.39 ( 477.65 )
VIRAL INFECTION	INFECTIONS AND INFESTATIONS	88	1.28 ( 1.03 - 1.58 )	1.28 ( 5.11 )
MIGRAINE	NERVOUS SYSTEM DISORDERS	88	0.73 ( 0.59 - 0.9 )	0.73 ( 8.44 )
NEUROPATHY PERIPHERAL	NERVOUS SYSTEM DISORDERS	88	1.38 ( 1.12 - 1.71 )	1.38 ( 8.99 )
RESPIRATORY DISORDER	RESPIRATORY, THORACIC AND MEDIASTINAL DISORDERS	87	1.48 ( 1.2 - 1.84 )	1.48 ( 13.12 )
RENAL DISORDER	RENAL AND URINARY DISORDERS	85	1.6 ( 1.29 - 1.99 )	1.6 ( 18.49 )
TOOTH INFECTION	INFECTIONS AND INFESTATIONS	84	1.38 ( 1.11 - 1.71 )	1.38 ( 8.46 )
SPINAL FUSION SURGERY	SURGICAL AND MEDICAL PROCEDURES	82	4.81 ( 3.82 - 6.05 )	4.8 ( 220.23 )
MENISCUS INJURY	INJURY, POISONING AND PROCEDURAL COMPLICATIONS	82	2.63 ( 2.1 - 3.28 )	2.62 ( 77.29 )
PALPITATIONS	CARDIAC DISORDERS	81	1 ( 0.8 - 1.25 )	1 ( 0 )
FUNGAL INFECTION	INFECTIONS AND INFESTATIONS	81	1.14 ( 0.91 - 1.42 )	1.14 ( 1.36 )
SPINAL STENOSIS	MUSCULOSKELETAL AND CONNECTIVE TISSUE DISORDERS	80	4.22 ( 3.35 - 5.32 )	4.22 ( 177.44 )
BREAST CANCER	NEOPLASMS BENIGN, MALIGNANT AND UNSPECIFIED (INCL CYSTS AND POLYPS)	80	0.88 ( 0.71 - 1.1 )	0.88 ( 1.18 )
BREAST CANCER FEMALE	NEOPLASMS BENIGN, MALIGNANT AND UNSPECIFIED (INCL CYSTS AND POLYPS)	80	5.03 ( 3.99 - 6.35 )	5.03 ( 229.15 )
TRANSIENT ISCHAEMIC ATTACK	NERVOUS SYSTEM DISORDERS	79	2.26 ( 1.8 - 2.83 )	2.26 ( 52.34 )
BONE PAIN	MUSCULOSKELETAL AND CONNECTIVE TISSUE DISORDERS	79	1.4 ( 1.12 - 1.76 )	1.4 ( 8.87 )
CHOLELITHIASIS	HEPATOBILIARY DISORDERS	78	1.61 ( 1.29 - 2.02 )	1.61 ( 17.44 )
RHINORRHOEA	RESPIRATORY, THORACIC AND MEDIASTINAL DISORDERS	77	0.56 ( 0.44 - 0.7 )	0.56 ( 26.79 )
BLOOD POTASSIUM DECREASED	INVESTIGATIONS	76	2.52 ( 2 - 3.17 )	2.52 ( 65.25 )
GASTROOESOPHAGEAL REFLUX DISEASE	GASTROINTESTINAL DISORDERS	76	0.93 ( 0.74 - 1.16 )	0.93 ( 0.45 )
NODULE	GENERAL DISORDERS AND ADMINISTRATION SITE CONDITIONS	76	0.86 ( 0.69 - 1.08 )	0.86 ( 1.63 )
INTENTIONAL PRODUCT MISUSE	INJURY, POISONING AND PROCEDURAL COMPLICATIONS	76	0.75 ( 0.6 - 0.94 )	0.75 ( 6.32 )
OFF LABEL USE	INJURY, POISONING AND PROCEDURAL COMPLICATIONS	75	0.11 ( 0.09 - 0.14 )	0.11 ( 516.63 )
HEAD INJURY	INJURY, POISONING AND PROCEDURAL COMPLICATIONS	74	2.14 ( 1.69 - 2.7 )	2.14 ( 42.42 )
BURNING SENSATION	NERVOUS SYSTEM DISORDERS	74	0.89 ( 0.71 - 1.12 )	0.89 ( 0.93 )
HYPOPHAGIA	METABOLISM AND NUTRITION DISORDERS	74	3.01 ( 2.38 - 3.81 )	3.01 ( 92.26 )
BLOOD GLUCOSE INCREASED	INVESTIGATIONS	74	1.12 ( 0.89 - 1.41 )	1.12 ( 0.92 )
EYE OPERATION	SURGICAL AND MEDICAL PROCEDURES	74	7.27 ( 5.68 - 9.32 )	7.27 ( 337.88 )
POSTOPERATIVE WOUND INFECTION	INFECTIONS AND INFESTATIONS	72	2.56 ( 2.01 - 3.24 )	2.55 ( 63.97 )
EXOSTOSIS	MUSCULOSKELETAL AND CONNECTIVE TISSUE DISORDERS	72	1.54 ( 1.22 - 1.95 )	1.54 ( 13.26 )
HEART RATE INCREASED	INVESTIGATIONS	71	0.8 ( 0.63 - 1.01 )	0.8 ( 3.56 )
VERTIGO	EAR AND LABYRINTH DISORDERS	71	1.31 ( 1.03 - 1.66 )	1.31 ( 5.04 )
EPISTAXIS	RESPIRATORY, THORACIC AND MEDIASTINAL DISORDERS	71	1.28 ( 1.01 - 1.62 )	1.28 ( 4.25 )
URTICARIA	SKIN AND SUBCUTANEOUS TISSUE DISORDERS	71	0.32 ( 0.25 - 0.4 )	0.32 ( 103.51 )
BACTERIAL INFECTION	INFECTIONS AND INFESTATIONS	71	2.09 ( 1.64 - 2.65 )	2.09 ( 38.21 )
HAEMORRHAGE	VASCULAR DISORDERS	71	1.18 ( 0.93 - 1.49 )	1.18 ( 1.85 )
PULMONARY OEDEMA	RESPIRATORY, THORACIC AND MEDIASTINAL DISORDERS	71	1.47 ( 1.16 - 1.86 )	1.47 ( 10.12 )
ORAL HERPES	INFECTIONS AND INFESTATIONS	71	1.35 ( 1.07 - 1.71 )	1.35 ( 6.3 )
CARDIAC FAILURE CONGESTIVE	CARDIAC DISORDERS	70	1.19 ( 0.94 - 1.51 )	1.19 ( 2.09 )
NASAL CONGESTION	RESPIRATORY, THORACIC AND MEDIASTINAL DISORDERS	70	0.58 ( 0.46 - 0.73 )	0.58 ( 21.28 )
SINUS DISORDER	RESPIRATORY, THORACIC AND MEDIASTINAL DISORDERS	69	1.42 ( 1.12 - 1.81 )	1.42 ( 8.39 )
GASTROENTERITIS VIRAL	INFECTIONS AND INFESTATIONS	69	1.6 ( 1.26 - 2.03 )	1.6 ( 14.88 )
INFLAMMATORY MARKER INCREASED	INVESTIGATIONS	68	3.3 ( 2.58 - 4.23 )	3.3 ( 100.76 )
PANCREATITIS	GASTROINTESTINAL DISORDERS	68	1.82 ( 1.43 - 2.32 )	1.82 ( 23.98 )
INTERVERTEBRAL DISC DEGENERATION	MUSCULOSKELETAL AND CONNECTIVE TISSUE DISORDERS	68	2.3 ( 1.8 - 2.94 )	2.3 ( 47.16 )
DISCOMFORT	GENERAL DISORDERS AND ADMINISTRATION SITE CONDITIONS	68	0.4 ( 0.32 - 0.51 )	0.4 ( 59.22 )
WHITE BLOOD CELL COUNT INCREASED	INVESTIGATIONS	67	1.44 ( 1.13 - 1.84 )	1.44 ( 8.62 )
PSORIASIS	SKIN AND SUBCUTANEOUS TISSUE DISORDERS	67	0.44 ( 0.35 - 0.56 )	0.44 ( 46.43 )
BEDRIDDEN	SOCIAL CIRCUMSTANCES	67	2.35 ( 1.84 - 3.01 )	2.35 ( 48.92 )
SKIN ULCER	SKIN AND SUBCUTANEOUS TISSUE DISORDERS	66	0.73 ( 0.57 - 0.93 )	0.73 ( 6.6 )
WRIST FRACTURE	INJURY, POISONING AND PROCEDURAL COMPLICATIONS	66	2.4 ( 1.87 - 3.07 )	2.4 ( 50.58 )
INFLUENZA LIKE ILLNESS	GENERAL DISORDERS AND ADMINISTRATION SITE CONDITIONS	66	0.59 ( 0.46 - 0.76 )	0.59 ( 18.26 )
CONFUSIONAL STATE	PSYCHIATRIC DISORDERS	65	0.45 ( 0.35 - 0.58 )	0.45 ( 42.73 )
CHOLECYSTECTOMY	SURGICAL AND MEDICAL PROCEDURES	65	3.64 ( 2.82 - 4.69 )	3.64 ( 113.72 )
LIVER DISORDER	HEPATOBILIARY DISORDERS	65	0.68 ( 0.53 - 0.87 )	0.68 ( 9.82 )
PHARYNGITIS STREPTOCOCCAL	INFECTIONS AND INFESTATIONS	65	2.02 ( 1.58 - 2.6 )	2.02 ( 32.04 )
DEEP VEIN THROMBOSIS	VASCULAR DISORDERS	64	1.27 ( 0.99 - 1.63 )	1.27 ( 3.54 )
CYST	GENERAL DISORDERS AND ADMINISTRATION SITE CONDITIONS	64	1.43 ( 1.12 - 1.84 )	1.43 ( 8.09 )
ABDOMINAL DISTENSION	GASTROINTESTINAL DISORDERS	64	0.86 ( 0.67 - 1.1 )	0.86 ( 1.38 )
FINGER DEFORMITY	MUSCULOSKELETAL AND CONNECTIVE TISSUE DISORDERS	64	1.15 ( 0.9 - 1.48 )	1.15 ( 1.23 )
LIMB DISCOMFORT	MUSCULOSKELETAL AND CONNECTIVE TISSUE DISORDERS	64	1.03 ( 0.8 - 1.32 )	1.03 ( 0.04 )
NECK SURGERY	SURGICAL AND MEDICAL PROCEDURES	63	7.54 ( 5.76 - 9.88 )	7.54 ( 300 )
COLITIS	GASTROINTESTINAL DISORDERS	63	1.69 ( 1.31 - 2.17 )	1.69 ( 16.93 )
WALKING AID USER	SOCIAL CIRCUMSTANCES	63	2.52 ( 1.96 - 3.26 )	2.52 ( 54.45 )
TRIGGER FINGER	MUSCULOSKELETAL AND CONNECTIVE TISSUE DISORDERS	63	3.78 ( 2.92 - 4.89 )	3.77 ( 117.3 )
STOMATITIS	GASTROINTESTINAL DISORDERS	62	0.38 ( 0.3 - 0.49 )	0.38 ( 62.41 )
TOOTH EXTRACTION	SURGICAL AND MEDICAL PROCEDURES	62	2.3 ( 1.78 - 2.97 )	2.3 ( 43 )
LIGAMENT SPRAIN	INJURY, POISONING AND PROCEDURAL COMPLICATIONS	62	2.29 ( 1.77 - 2.96 )	2.29 ( 42.7 )
FEELING HOT	GENERAL DISORDERS AND ADMINISTRATION SITE CONDITIONS	61	0.76 ( 0.59 - 0.98 )	0.76 ( 4.6 )
HYSTERECTOMY	SURGICAL AND MEDICAL PROCEDURES	61	3.79 ( 2.92 - 4.94 )	3.79 ( 114.48 )
DRY MOUTH	GASTROINTESTINAL DISORDERS	61	0.62 ( 0.48 - 0.79 )	0.62 ( 14.38 )
SPEECH DISORDER	NERVOUS SYSTEM DISORDERS	61	2.01 ( 1.55 - 2.6 )	2.01 ( 29.34 )
NEURALGIA	NERVOUS SYSTEM DISORDERS	60	1.71 ( 1.32 - 2.21 )	1.71 ( 16.89 )
DYSPHONIA	RESPIRATORY, THORACIC AND MEDIASTINAL DISORDERS	60	0.83 ( 0.64 - 1.07 )	0.83 ( 2.08 )
SPINAL PAIN	MUSCULOSKELETAL AND CONNECTIVE TISSUE DISORDERS	60	2.03 ( 1.57 - 2.63 )	2.03 ( 29.76 )
LOWER RESPIRATORY TRACT INFECTION	INFECTIONS AND INFESTATIONS	59	0.25 ( 0.2 - 0.33 )	0.25 ( 129.67 )
PELVIC FRACTURE	INJURY, POISONING AND PROCEDURAL COMPLICATIONS	59	2.72 ( 2.09 - 3.54 )	2.72 ( 59.82 )
CARDIAC FAILURE	CARDIAC DISORDERS	59	0.9 ( 0.69 - 1.16 )	0.9 ( 0.65 )
ACUTE KIDNEY INJURY	RENAL AND URINARY DISORDERS	58	1.29 ( 1 - 1.68 )	1.29 ( 3.77 )
MALIGNANT MELANOMA	NEOPLASMS BENIGN, MALIGNANT AND UNSPECIFIED (INCL CYSTS AND POLYPS)	58	1.65 ( 1.27 - 2.15 )	1.65 ( 14.38 )
WOUND	INJURY, POISONING AND PROCEDURAL COMPLICATIONS	58	0.3 ( 0.23 - 0.39 )	0.3 ( 92.15 )
BLOOD PRESSURE ABNORMAL	INVESTIGATIONS	58	2.18 ( 1.67 - 2.84 )	2.18 ( 34.98 )
LIVER FUNCTION TEST INCREASED	INVESTIGATIONS	57	0.82 ( 0.63 - 1.07 )	0.82 ( 2.18 )
OEDEMA PERIPHERAL	GENERAL DISORDERS AND ADMINISTRATION SITE CONDITIONS	57	0.28 ( 0.22 - 0.37 )	0.28 ( 101.81 )
HAEMATOCHEZIA	GASTROINTESTINAL DISORDERS	56	1.47 ( 1.12 - 1.92 )	1.47 ( 8.06 )
JOINT EFFUSION	MUSCULOSKELETAL AND CONNECTIVE TISSUE DISORDERS	56	1.06 ( 0.81 - 1.38 )	1.06 ( 0.16 )
MEDICAL DEVICE IMPLANTATION	SURGICAL AND MEDICAL PROCEDURES	55	14.58 ( 10.7 - 19.87 )	14.57 ( 507.92 )
JOINT ARTHROPLASTY	SURGICAL AND MEDICAL PROCEDURES	54	2.78 ( 2.11 - 3.66 )	2.78 ( 57.35 )
EYE INFECTION	INFECTIONS AND INFESTATIONS	54	1.65 ( 1.26 - 2.17 )	1.65 ( 13.41 )
MUSCLE STRAIN	INJURY, POISONING AND PROCEDURAL COMPLICATIONS	53	3.32 ( 2.51 - 4.39 )	3.32 ( 79.12 )
SKIN LACERATION	INJURY, POISONING AND PROCEDURAL COMPLICATIONS	53	1.87 ( 1.42 - 2.46 )	1.87 ( 20.43 )
EYE DISORDER	EYE DISORDERS	53	0.98 ( 0.74 - 1.28 )	0.98 ( 0.03 )
PROSTATE CANCER	NEOPLASMS BENIGN, MALIGNANT AND UNSPECIFIED (INCL CYSTS AND POLYPS)	53	1.86 ( 1.41 - 2.44 )	1.86 ( 19.96 )
PRODUCTIVE COUGH	RESPIRATORY, THORACIC AND MEDIASTINAL DISORDERS	52	0.54 ( 0.41 - 0.7 )	0.54 ( 20.66 )
SWELLING FACE	GENERAL DISORDERS AND ADMINISTRATION SITE CONDITIONS	52	0.77 ( 0.58 - 1.01 )	0.77 ( 3.58 )
TACHYCARDIA	CARDIAC DISORDERS	51	1.13 ( 0.86 - 1.5 )	1.13 ( 0.78 )
ORAL SURGERY	SURGICAL AND MEDICAL PROCEDURES	51	9.12 ( 6.72 - 12.36 )	9.11 ( 299.25 )
AMNESIA	NERVOUS SYSTEM DISORDERS	51	0.77 ( 0.59 - 1.02 )	0.77 ( 3.37 )
NIGHT SWEATS	SKIN AND SUBCUTANEOUS TISSUE DISORDERS	50	0.69 ( 0.53 - 0.92 )	0.69 ( 6.6 )
C-REACTIVE PROTEIN INCREASED	INVESTIGATIONS	50	0.35 ( 0.26 - 0.46 )	0.35 ( 60.94 )
FRACTURE	INJURY, POISONING AND PROCEDURAL COMPLICATIONS	50	1.58 ( 1.19 - 2.1 )	1.58 ( 10.22 )
FLUID RETENTION	METABOLISM AND NUTRITION DISORDERS	49	1.07 ( 0.81 - 1.42 )	1.07 ( 0.23 )
PULMONARY MASS	RESPIRATORY, THORACIC AND MEDIASTINAL DISORDERS	49	0.94 ( 0.71 - 1.24 )	0.94 ( 0.2 )
JOINT LOCK	MUSCULOSKELETAL AND CONNECTIVE TISSUE DISORDERS	49	2.7 ( 2.02 - 3.6 )	2.69 ( 48.89 )
BURSITIS	MUSCULOSKELETAL AND CONNECTIVE TISSUE DISORDERS	49	0.65 ( 0.49 - 0.86 )	0.65 ( 9.17 )
BONE DISORDER	MUSCULOSKELETAL AND CONNECTIVE TISSUE DISORDERS	49	1.2 ( 0.9 - 1.6 )	1.2 ( 1.6 )
GLAUCOMA	EYE DISORDERS	49	1.33 ( 1 - 1.76 )	1.33 ( 3.82 )
BLOOD SODIUM DECREASED	INVESTIGATIONS	48	3.15 ( 2.35 - 4.23 )	3.15 ( 65.18 )
INTESTINAL OBSTRUCTION	GASTROINTESTINAL DISORDERS	48	1.77 ( 1.33 - 2.36 )	1.77 ( 15.38 )
GASTRITIS	GASTROINTESTINAL DISORDERS	48	1.3 ( 0.98 - 1.73 )	1.3 ( 3.23 )
GASTROINTESTINAL HAEMORRHAGE	GASTROINTESTINAL DISORDERS	47	1.35 ( 1.01 - 1.8 )	1.35 ( 4.1 )
RESPIRATORY TRACT CONGESTION	RESPIRATORY, THORACIC AND MEDIASTINAL DISORDERS	47	0.71 ( 0.53 - 0.94 )	0.71 ( 5.64 )
GENERAL PHYSICAL CONDITION ABNORMAL	INVESTIGATIONS	47	9.38 ( 6.82 - 12.89 )	9.37 ( 284.1 )
DENTAL OPERATION	SURGICAL AND MEDICAL PROCEDURES	47	8.68 ( 6.33 - 11.9 )	8.67 ( 261.56 )
REHABILITATION THERAPY	SURGICAL AND MEDICAL PROCEDURES	47	8.68 ( 6.33 - 11.9 )	8.67 ( 261.56 )
ACCIDENT	INJURY, POISONING AND PROCEDURAL COMPLICATIONS	47	1.97 ( 1.47 - 2.64 )	1.97 ( 21.45 )
BACK INJURY	INJURY, POISONING AND PROCEDURAL COMPLICATIONS	46	1.8 ( 1.34 - 2.42 )	1.8 ( 15.7 )
DEAFNESS	EAR AND LABYRINTH DISORDERS	46	1.29 ( 0.96 - 1.73 )	1.29 ( 2.94 )
ANKLE OPERATION	SURGICAL AND MEDICAL PROCEDURES	46	5.54 ( 4.07 - 7.54 )	5.54 ( 150 )
ARRHYTHMIA	CARDIAC DISORDERS	46	1.33 ( 0.99 - 1.79 )	1.33 ( 3.69 )
BLINDNESS	EYE DISORDERS	46	1.2 ( 0.89 - 1.6 )	1.2 ( 1.44 )
COLON CANCER	NEOPLASMS BENIGN, MALIGNANT AND UNSPECIFIED (INCL CYSTS AND POLYPS)	46	1.75 ( 1.3 - 2.35 )	1.75 ( 14.11 )
DYSPHAGIA	GASTROINTESTINAL DISORDERS	45	0.86 ( 0.64 - 1.15 )	0.86 ( 1.04 )
RED BLOOD CELL COUNT DECREASED	INVESTIGATIONS	45	1.69 ( 1.25 - 2.28 )	1.69 ( 12.13 )
MUSCULOSKELETAL DISCOMFORT	MUSCULOSKELETAL AND CONNECTIVE TISSUE DISORDERS	45	1.14 ( 0.85 - 1.54 )	1.14 ( 0.76 )
PLEURAL EFFUSION	RESPIRATORY, THORACIC AND MEDIASTINAL DISORDERS	45	0.65 ( 0.48 - 0.87 )	0.65 ( 8.56 )
RENAL IMPAIRMENT	RENAL AND URINARY DISORDERS	45	0.72 ( 0.54 - 0.97 )	0.72 ( 4.81 )
DRY EYE	EYE DISORDERS	45	0.65 ( 0.48 - 0.87 )	0.65 ( 8.43 )
JOINT NOISE	MUSCULOSKELETAL AND CONNECTIVE TISSUE DISORDERS	45	5.57 ( 4.08 - 7.61 )	5.57 ( 147.88 )
TENDONITIS	MUSCULOSKELETAL AND CONNECTIVE TISSUE DISORDERS	45	1.46 ( 1.08 - 1.96 )	1.46 ( 6.18 )
HYPOACUSIS	EAR AND LABYRINTH DISORDERS	45	0.93 ( 0.69 - 1.24 )	0.93 ( 0.26 )
MUSCULOSKELETAL CHEST PAIN	MUSCULOSKELETAL AND CONNECTIVE TISSUE DISORDERS	44	1.83 ( 1.36 - 2.48 )	1.83 ( 15.97 )
POLLAKIURIA	RENAL AND URINARY DISORDERS	44	1.3 ( 0.96 - 1.75 )	1.3 ( 2.91 )
ACUTE RESPIRATORY FAILURE	RESPIRATORY, THORACIC AND MEDIASTINAL DISORDERS	44	3.38 ( 2.48 - 4.6 )	3.38 ( 67.93 )
CORONARY ARTERY OCCLUSION	CARDIAC DISORDERS	44	1.58 ( 1.17 - 2.13 )	1.58 ( 8.92 )
CARDIAC ARREST	CARDIAC DISORDERS	44	1.41 ( 1.05 - 1.91 )	1.41 ( 5.12 )
LYMPHADENOPATHY	BLOOD AND LYMPHATIC SYSTEM DISORDERS	44	0.72 ( 0.53 - 0.97 )	0.72 ( 4.78 )
SKIN INFECTION	INFECTIONS AND INFESTATIONS	43	1.49 ( 1.1 - 2.02 )	1.49 ( 6.6 )
OSTEOMYELITIS	INFECTIONS AND INFESTATIONS	43	0.94 ( 0.69 - 1.27 )	0.94 ( 0.17 )
SPINAL COMPRESSION FRACTURE	INJURY, POISONING AND PROCEDURAL COMPLICATIONS	43	2.1 ( 1.55 - 2.86 )	2.1 ( 23.65 )
FEELING COLD	GENERAL DISORDERS AND ADMINISTRATION SITE CONDITIONS	42	1.43 ( 1.05 - 1.95 )	1.43 ( 5.28 )
SKIN EXFOLIATION	SKIN AND SUBCUTANEOUS TISSUE DISORDERS	42	0.93 ( 0.68 - 1.26 )	0.93 ( 0.23 )
SUICIDAL IDEATION	PSYCHIATRIC DISORDERS	42	2 ( 1.46 - 2.72 )	2 ( 19.86 )
FEEDING DISORDER	METABOLISM AND NUTRITION DISORDERS	42	2.28 ( 1.67 - 3.11 )	2.27 ( 28.38 )
LABORATORY TEST ABNORMAL	INVESTIGATIONS	42	1.35 ( 0.99 - 1.84 )	1.35 ( 3.71 )
POOR QUALITY SLEEP	PSYCHIATRIC DISORDERS	42	2.12 ( 1.56 - 2.9 )	2.12 ( 23.69 )
HAND DEFORMITY	MUSCULOSKELETAL AND CONNECTIVE TISSUE DISORDERS	42	0.2 ( 0.15 - 0.27 )	0.2 ( 136.09 )
HIATUS HERNIA	GASTROINTESTINAL DISORDERS	42	1.66 ( 1.22 - 2.27 )	1.66 ( 10.66 )
THYROID DISORDER	ENDOCRINE DISORDERS	42	1.66 ( 1.22 - 2.25 )	1.65 ( 10.45 )
ARTHRITIS INFECTIVE	INFECTIONS AND INFESTATIONS	42	1.37 ( 1.01 - 1.86 )	1.37 ( 4.02 )
PNEUMONIA BACTERIAL	INFECTIONS AND INFESTATIONS	41	2.61 ( 1.9 - 3.58 )	2.61 ( 38.23 )
ACUTE MYOCARDIAL INFARCTION	CARDIAC DISORDERS	41	1.62 ( 1.19 - 2.22 )	1.62 ( 9.44 )
RETINAL DETACHMENT	EYE DISORDERS	41	3.42 ( 2.49 - 4.71 )	3.42 ( 64.7 )
CARDIAC OPERATION	SURGICAL AND MEDICAL PROCEDURES	41	3.93 ( 2.85 - 5.42 )	3.93 ( 81.44 )
MASS	GENERAL DISORDERS AND ADMINISTRATION SITE CONDITIONS	41	1.1 ( 0.8 - 1.49 )	1.1 ( 0.34 )
INJURY	INJURY, POISONING AND PROCEDURAL COMPLICATIONS	41	0.58 ( 0.43 - 0.79 )	0.58 ( 12.25 )
SPINAL DISORDER	MUSCULOSKELETAL AND CONNECTIVE TISSUE DISORDERS	41	1.35 ( 0.99 - 1.85 )	1.35 ( 3.66 )
TINNITUS	EAR AND LABYRINTH DISORDERS	40	1.15 ( 0.84 - 1.58 )	1.15 ( 0.78 )
MATERNAL EXPOSURE DURING PREGNANCY	INJURY, POISONING AND PROCEDURAL COMPLICATIONS	40	0.23 ( 0.17 - 0.32 )	0.23 ( 99.88 )
TIBIA FRACTURE	INJURY, POISONING AND PROCEDURAL COMPLICATIONS	40	2.85 ( 2.07 - 3.93 )	2.85 ( 44.83 )
BLOOD TEST ABNORMAL	INVESTIGATIONS	40	1.58 ( 1.15 - 2.16 )	1.58 ( 8.14 )
BLOOD URINE PRESENT	INVESTIGATIONS	39	1.84 ( 1.33 - 2.53 )	1.84 ( 14.23 )
ULCER	GENERAL DISORDERS AND ADMINISTRATION SITE CONDITIONS	39	0.99 ( 0.72 - 1.36 )	0.99 ( 0.01 )
DISABILITY	SOCIAL CIRCUMSTANCES	39	1.08 ( 0.79 - 1.49 )	1.08 ( 0.25 )
PRODUCT DOSE OMISSION ISSUE	INJURY, POISONING AND PROCEDURAL COMPLICATIONS	39	0.19 ( 0.14 - 0.27 )	0.19 ( 129.33 )
PLATELET COUNT DECREASED	INVESTIGATIONS	38	0.75 ( 0.54 - 1.03 )	0.75 ( 3.24 )
DYSURIA	RENAL AND URINARY DISORDERS	38	1.1 ( 0.8 - 1.52 )	1.1 ( 0.32 )
CORONAVIRUS INFECTION	INFECTIONS AND INFESTATIONS	38	6.28 ( 4.46 - 8.84 )	6.28 ( 145.49 )
BLOOD CREATININE INCREASED	INVESTIGATIONS	38	1.04 ( 0.75 - 1.43 )	1.04 ( 0.05 )
CEREBRAL HAEMORRHAGE	NERVOUS SYSTEM DISORDERS	38	2.17 ( 1.57 - 3.02 )	2.17 ( 22.85 )
LIGAMENT RUPTURE	INJURY, POISONING AND PROCEDURAL COMPLICATIONS	38	2.34 ( 1.69 - 3.25 )	2.34 ( 27.55 )
TOOTH FRACTURE	INJURY, POISONING AND PROCEDURAL COMPLICATIONS	37	1.23 ( 0.88 - 1.7 )	1.23 ( 1.49 )
WOUND INFECTION	INFECTIONS AND INFESTATIONS	37	0.73 ( 0.52 - 1.01 )	0.73 ( 3.74 )
THERAPEUTIC RESPONSE UNEXPECTED	GENERAL DISORDERS AND ADMINISTRATION SITE CONDITIONS	37	1.02 ( 0.74 - 1.41 )	1.02 ( 0.01 )
SPINAL OSTEOARTHRITIS	MUSCULOSKELETAL AND CONNECTIVE TISSUE DISORDERS	37	1.47 ( 1.06 - 2.04 )	1.47 ( 5.33 )
NERVE INJURY	INJURY, POISONING AND PROCEDURAL COMPLICATIONS	37	1.7 ( 1.23 - 2.37 )	1.7 ( 10.33 )
PNEUMOCYSTIS JIROVECII PNEUMONIA	INFECTIONS AND INFESTATIONS	37	1.41 ( 1.01 - 1.96 )	1.41 ( 4.24 )
SQUAMOUS CELL CARCINOMA	NEOPLASMS BENIGN, MALIGNANT AND UNSPECIFIED (INCL CYSTS AND POLYPS)	37	1.63 ( 1.17 - 2.26 )	1.63 ( 8.58 )
ROTATOR CUFF REPAIR	SURGICAL AND MEDICAL PROCEDURES	37	5.66 ( 4.01 - 8 )	5.66 ( 124.24 )
EAR PAIN	EAR AND LABYRINTH DISORDERS	36	0.59 ( 0.43 - 0.83 )	0.59 ( 9.8 )
GASTRIC ULCER	GASTROINTESTINAL DISORDERS	36	1.09 ( 0.78 - 1.51 )	1.09 ( 0.25 )
WRIST SURGERY	SURGICAL AND MEDICAL PROCEDURES	36	5.8 ( 4.09 - 8.24 )	5.8 ( 124.75 )
ALANINE AMINOTRANSFERASE INCREASED	INVESTIGATIONS	36	0.57 ( 0.41 - 0.79 )	0.57 ( 11.53 )
CHRONIC KIDNEY DISEASE	RENAL AND URINARY DISORDERS	36	1.8 ( 1.29 - 2.52 )	1.8 ( 12.33 )
LYMPHOMA	NEOPLASMS BENIGN, MALIGNANT AND UNSPECIFIED (INCL CYSTS AND POLYPS)	36	0.75 ( 0.54 - 1.04 )	0.75 ( 2.94 )
PERICARDIAL EFFUSION	CARDIAC DISORDERS	36	1.63 ( 1.17 - 2.27 )	1.63 ( 8.38 )
SEPTIC SHOCK	INFECTIONS AND INFESTATIONS	36	0.76 ( 0.54 - 1.05 )	0.76 ( 2.77 )
OSTEONECROSIS	MUSCULOSKELETAL AND CONNECTIVE TISSUE DISORDERS	36	2.44 ( 1.74 - 3.42 )	2.44 ( 28.88 )
ABSCESS	INFECTIONS AND INFESTATIONS	36	1.34 ( 0.96 - 1.87 )	1.34 ( 3.02 )
HOT FLUSH	VASCULAR DISORDERS	36	0.68 ( 0.49 - 0.94 )	0.68 ( 5.42 )
BLOOD PRESSURE DECREASED	INVESTIGATIONS	36	0.89 ( 0.64 - 1.24 )	0.89 ( 0.47 )
INTERVERTEBRAL DISC OPERATION	SURGICAL AND MEDICAL PROCEDURES	36	8.83 ( 6.15 - 12.68 )	8.83 ( 204.25 )
RESPIRATORY FAILURE	RESPIRATORY, THORACIC AND MEDIASTINAL DISORDERS	35	0.57 ( 0.41 - 0.8 )	0.57 ( 11.06 )
IMPAIRED WORK ABILITY	SOCIAL CIRCUMSTANCES	35	1.14 ( 0.82 - 1.6 )	1.14 ( 0.6 )
BLOOD IRON DECREASED	INVESTIGATIONS	35	1.7 ( 1.21 - 2.39 )	1.7 ( 9.71 )
SINUS CONGESTION	RESPIRATORY, THORACIC AND MEDIASTINAL DISORDERS	35	0.65 ( 0.47 - 0.91 )	0.65 ( 6.29 )
GALLBLADDER DISORDER	HEPATOBILIARY DISORDERS	34	1.23 ( 0.88 - 1.74 )	1.23 ( 1.46 )
MUSCULOSKELETAL PAIN	MUSCULOSKELETAL AND CONNECTIVE TISSUE DISORDERS	34	0.14 ( 0.1 - 0.19 )	0.14 ( 180.33 )
RASH PRURITIC	SKIN AND SUBCUTANEOUS TISSUE DISORDERS	34	0.33 ( 0.23 - 0.46 )	0.33 ( 46.78 )
EYE PAIN	EYE DISORDERS	34	0.89 ( 0.64 - 1.25 )	0.89 ( 0.43 )
URINARY INCONTINENCE	RENAL AND URINARY DISORDERS	34	1.7 ( 1.21 - 2.4 )	1.7 ( 9.38 )
THROAT IRRITATION	RESPIRATORY, THORACIC AND MEDIASTINAL DISORDERS	34	0.54 ( 0.39 - 0.76 )	0.54 ( 13.03 )
DRY SKIN	SKIN AND SUBCUTANEOUS TISSUE DISORDERS	33	0.54 ( 0.38 - 0.76 )	0.54 ( 12.63 )
FLATULENCE	GASTROINTESTINAL DISORDERS	33	1.16 ( 0.82 - 1.65 )	1.16 ( 0.74 )
CANDIDA INFECTION	INFECTIONS AND INFESTATIONS	33	1.44 ( 1.02 - 2.04 )	1.44 ( 4.28 )
ASPARTATE AMINOTRANSFERASE INCREASED	INVESTIGATIONS	33	0.64 ( 0.46 - 0.91 )	0.64 ( 6.36 )
SPONDYLITIS	MUSCULOSKELETAL AND CONNECTIVE TISSUE DISORDERS	33	2.84 ( 1.99 - 4.04 )	2.84 ( 36.67 )
HEPATIC STEATOSIS	HEPATOBILIARY DISORDERS	33	0.84 ( 0.59 - 1.18 )	0.84 ( 1.04 )
GALLBLADDER OPERATION	SURGICAL AND MEDICAL PROCEDURES	33	3.61 ( 2.53 - 5.16 )	3.61 ( 57.04 )
NEUTROPENIA	BLOOD AND LYMPHATIC SYSTEM DISORDERS	32	0.63 ( 0.44 - 0.89 )	0.63 ( 6.96 )
HAEMATOMA	VASCULAR DISORDERS	32	1.32 ( 0.93 - 1.87 )	1.32 ( 2.35 )
CARDIAC PACEMAKER INSERTION	SURGICAL AND MEDICAL PROCEDURES	32	5.2 ( 3.6 - 7.52 )	5.2 ( 95.91 )
WHEEZING	RESPIRATORY, THORACIC AND MEDIASTINAL DISORDERS	32	0.45 ( 0.32 - 0.64 )	0.45 ( 21.35 )
BLINDNESS UNILATERAL	EYE DISORDERS	31	2.09 ( 1.46 - 3 )	2.09 ( 16.71 )
PYELONEPHRITIS	INFECTIONS AND INFESTATIONS	31	1.83 ( 1.28 - 2.63 )	1.83 ( 11.2 )
IMMUNE SYSTEM DISORDER	IMMUNE SYSTEM DISORDERS	31	0.82 ( 0.58 - 1.17 )	0.82 ( 1.15 )
INTESTINAL PERFORATION	GASTROINTESTINAL DISORDERS	31	1.93 ( 1.35 - 2.77 )	1.93 ( 13.32 )
TOOTHACHE	GASTROINTESTINAL DISORDERS	31	0.77 ( 0.54 - 1.1 )	0.77 ( 2.02 )
RESPIRATORY SYNCYTIAL VIRUS INFECTION	INFECTIONS AND INFESTATIONS	31	7.16 ( 4.88 - 10.5 )	7.16 ( 139.03 )
ARTHROPOD BITE	INJURY, POISONING AND PROCEDURAL COMPLICATIONS	31	1.1 ( 0.77 - 1.57 )	1.1 ( 0.28 )
CARTILAGE INJURY	INJURY, POISONING AND PROCEDURAL COMPLICATIONS	31	2.51 ( 1.74 - 3.61 )	2.51 ( 26.44 )
UROSEPSIS	INFECTIONS AND INFESTATIONS	30	1.97 ( 1.36 - 2.84 )	1.97 ( 13.6 )
MACULAR DEGENERATION	EYE DISORDERS	30	1.73 ( 1.2 - 2.5 )	1.73 ( 8.94 )
HUMERUS FRACTURE	INJURY, POISONING AND PROCEDURAL COMPLICATIONS	30	2.49 ( 1.72 - 3.6 )	2.49 ( 25.13 )
THERAPEUTIC RESPONSE SHORTENED	GENERAL DISORDERS AND ADMINISTRATION SITE CONDITIONS	30	0.67 ( 0.47 - 0.96 )	0.67 ( 4.83 )
DENTAL IMPLANTATION	SURGICAL AND MEDICAL PROCEDURES	30	6.47 ( 4.4 - 9.53 )	6.47 ( 119.27 )
THERAPY NON-RESPONDER	GENERAL DISORDERS AND ADMINISTRATION SITE CONDITIONS	30	0.38 ( 0.26 - 0.54 )	0.38 ( 30.78 )
SCOLIOSIS	MUSCULOSKELETAL AND CONNECTIVE TISSUE DISORDERS	29	2.36 ( 1.62 - 3.43 )	2.36 ( 21.36 )
GASTROINTESTINAL INFECTION	INFECTIONS AND INFESTATIONS	29	1.32 ( 0.91 - 1.91 )	1.32 ( 2.15 )
SYNOVIAL CYST	MUSCULOSKELETAL AND CONNECTIVE TISSUE DISORDERS	29	0.82 ( 0.57 - 1.18 )	0.82 ( 1.13 )
GROIN PAIN	MUSCULOSKELETAL AND CONNECTIVE TISSUE DISORDERS	29	1.61 ( 1.11 - 2.33 )	1.61 ( 6.41 )
ARTERIAL OCCLUSIVE DISEASE	VASCULAR DISORDERS	29	1.75 ( 1.21 - 2.54 )	1.75 ( 8.99 )
PNEUMONITIS	RESPIRATORY, THORACIC AND MEDIASTINAL DISORDERS	28	0.84 ( 0.57 - 1.21 )	0.84 ( 0.89 )
EYE SWELLING	EYE DISORDERS	28	0.89 ( 0.61 - 1.29 )	0.89 ( 0.4 )
THERAPEUTIC PRODUCT EFFECT DELAYED	GENERAL DISORDERS AND ADMINISTRATION SITE CONDITIONS	28	4.53 ( 3.06 - 6.7 )	4.53 ( 69.12 )
PHARYNGITIS	INFECTIONS AND INFESTATIONS	28	0.55 ( 0.38 - 0.79 )	0.55 ( 10.37 )
PSORIATIC ARTHROPATHY	MUSCULOSKELETAL AND CONNECTIVE TISSUE DISORDERS	28	0.27 ( 0.19 - 0.4 )	0.27 ( 53.98 )
PAIN OF SKIN	SKIN AND SUBCUTANEOUS TISSUE DISORDERS	28	1.88 ( 1.28 - 2.74 )	1.88 ( 10.95 )
MEDICAL PROCEDURE	SURGICAL AND MEDICAL PROCEDURES	28	14.75 ( 9.55 - 22.76 )	14.74 ( 261.15 )
MUSCLE RUPTURE	INJURY, POISONING AND PROCEDURAL COMPLICATIONS	28	3.21 ( 2.19 - 4.73 )	3.21 ( 39.49 )
TENDON DISORDER	MUSCULOSKELETAL AND CONNECTIVE TISSUE DISORDERS	28	1.97 ( 1.35 - 2.88 )	1.97 ( 12.75 )
ANGINA PECTORIS	CARDIAC DISORDERS	28	0.95 ( 0.65 - 1.38 )	0.95 ( 0.08 )
HAEMORRHOIDS	GASTROINTESTINAL DISORDERS	28	1.3 ( 0.89 - 1.9 )	1.3 ( 1.9 )
INTERNAL HAEMORRHAGE	VASCULAR DISORDERS	28	3.2 ( 2.17 - 4.7 )	3.2 ( 39.07 )
BLOOD CREATINE PHOSPHOKINASE INCREASED	INVESTIGATIONS	28	3 ( 2.05 - 4.41 )	3 ( 34.79 )
BLOOD TRIGLYCERIDES INCREASED	INVESTIGATIONS	28	2.37 ( 1.62 - 3.47 )	2.37 ( 20.86 )
RHEUMATIC DISORDER	MUSCULOSKELETAL AND CONNECTIVE TISSUE DISORDERS	28	3.37 ( 2.29 - 4.96 )	3.37 ( 43.01 )
APPENDICITIS	INFECTIONS AND INFESTATIONS	27	2.3 ( 1.56 - 3.39 )	2.3 ( 18.8 )
TOOTH ABSCESS	INFECTIONS AND INFESTATIONS	27	0.7 ( 0.48 - 1.02 )	0.7 ( 3.45 )
URINARY RETENTION	RENAL AND URINARY DISORDERS	27	1.85 ( 1.26 - 2.72 )	1.85 ( 10.03 )
ARTHRODESIS	SURGICAL AND MEDICAL PROCEDURES	27	2.03 ( 1.38 - 2.98 )	2.03 ( 13.36 )
STENT PLACEMENT	SURGICAL AND MEDICAL PROCEDURES	27	3.19 ( 2.16 - 4.73 )	3.19 ( 37.6 )
LUMBAR VERTEBRAL FRACTURE	INJURY, POISONING AND PROCEDURAL COMPLICATIONS	27	2.73 ( 1.85 - 4.04 )	2.73 ( 27.76 )
RASH PAPULAR	SKIN AND SUBCUTANEOUS TISSUE DISORDERS	27	0.74 ( 0.51 - 1.08 )	0.74 ( 2.43 )
CORONARY ARTERIAL STENT INSERTION	SURGICAL AND MEDICAL PROCEDURES	27	4.8 ( 3.22 - 7.16 )	4.8 ( 72.47 )
SKIN BURNING SENSATION	SKIN AND SUBCUTANEOUS TISSUE DISORDERS	27	1.63 ( 1.11 - 2.4 )	1.63 ( 6.36 )
GOUT	METABOLISM AND NUTRITION DISORDERS	27	1.3 ( 0.89 - 1.91 )	1.3 ( 1.83 )
SLEEP APNOEA SYNDROME	RESPIRATORY, THORACIC AND MEDIASTINAL DISORDERS	27	1.18 ( 0.81 - 1.74 )	1.18 ( 0.74 )
POST PROCEDURAL SWELLING	INJURY, POISONING AND PROCEDURAL COMPLICATIONS	27	5.73 ( 3.83 - 8.58 )	5.73 ( 92.1 )
INCREASED TENDENCY TO BRUISE	BLOOD AND LYMPHATIC SYSTEM DISORDERS	27	0.9 ( 0.61 - 1.31 )	0.9 ( 0.31 )
LETHARGY	NERVOUS SYSTEM DISORDERS	27	0.85 ( 0.58 - 1.25 )	0.85 ( 0.66 )
SJOGREN'S SYNDROME	MUSCULOSKELETAL AND CONNECTIVE TISSUE DISORDERS	27	0.97 ( 0.66 - 1.42 )	0.97 ( 0.02 )
OSTEOPENIA	MUSCULOSKELETAL AND CONNECTIVE TISSUE DISORDERS	27	1.15 ( 0.78 - 1.68 )	1.15 ( 0.48 )
WHEELCHAIR USER	SOCIAL CIRCUMSTANCES	27	2.14 ( 1.45 - 3.15 )	2.14 ( 15.48 )
ARTHRITIS BACTERIAL	INFECTIONS AND INFESTATIONS	26	1.09 ( 0.74 - 1.6 )	1.09 ( 0.17 )
IMMUNOSUPPRESSION	IMMUNE SYSTEM DISORDERS	26	0.83 ( 0.56 - 1.22 )	0.83 ( 0.9 )
PNEUMONIA ASPIRATION	INFECTIONS AND INFESTATIONS	26	1.96 ( 1.32 - 2.91 )	1.96 ( 11.63 )
ECZEMA	SKIN AND SUBCUTANEOUS TISSUE DISORDERS	26	0.89 ( 0.6 - 1.31 )	0.89 ( 0.36 )
OEDEMA	GENERAL DISORDERS AND ADMINISTRATION SITE CONDITIONS	26	0.41 ( 0.28 - 0.61 )	0.41 ( 21.6 )
EMOTIONAL DISTRESS	PSYCHIATRIC DISORDERS	26	2.13 ( 1.43 - 3.15 )	2.13 ( 14.7 )
HAND FRACTURE	INJURY, POISONING AND PROCEDURAL COMPLICATIONS	26	1.56 ( 1.05 - 2.31 )	1.56 ( 5.03 )
MIDDLE INSOMNIA	PSYCHIATRIC DISORDERS	26	2.83 ( 1.9 - 4.21 )	2.83 ( 28.67 )
MOUTH ULCERATION	GASTROINTESTINAL DISORDERS	26	0.49 ( 0.33 - 0.72 )	0.49 ( 13.56 )
SINUS OPERATION	SURGICAL AND MEDICAL PROCEDURES	26	5.74 ( 3.8 - 8.66 )	5.73 ( 88.76 )
CLOSTRIDIUM DIFFICILE INFECTION	INFECTIONS AND INFESTATIONS	26	1.11 ( 0.75 - 1.64 )	1.11 ( 0.27 )
FIBULA FRACTURE	INJURY, POISONING AND PROCEDURAL COMPLICATIONS	26	3.68 ( 2.46 - 5.5 )	3.68 ( 46.41 )
HEPATIC CIRRHOSIS	HEPATOBILIARY DISORDERS	26	0.68 ( 0.46 - 1 )	0.68 ( 3.94 )
MULTIPLE SCLEROSIS	NERVOUS SYSTEM DISORDERS	26	1.82 ( 1.23 - 2.7 )	1.82 ( 9.19 )
TOOTH DISORDER	GASTROINTESTINAL DISORDERS	26	0.49 ( 0.33 - 0.72 )	0.49 ( 13.87 )
AGEUSIA	NERVOUS SYSTEM DISORDERS	26	2.42 ( 1.63 - 3.6 )	2.42 ( 20.44 )
GASTROENTERITIS	INFECTIONS AND INFESTATIONS	26	0.95 ( 0.65 - 1.41 )	0.95 ( 0.06 )
VACCINATION SITE PAIN	GENERAL DISORDERS AND ADMINISTRATION SITE CONDITIONS	26	13.51 ( 8.66 - 21.09 )	13.51 ( 224.37 )
PULMONARY HYPERTENSION	RESPIRATORY, THORACIC AND MEDIASTINAL DISORDERS	26	1.8 ( 1.22 - 2.67 )	1.8 ( 8.86 )
APHONIA	RESPIRATORY, THORACIC AND MEDIASTINAL DISORDERS	26	1.11 ( 0.75 - 1.63 )	1.11 ( 0.25 )
HAEMOPTYSIS	RESPIRATORY, THORACIC AND MEDIASTINAL DISORDERS	25	1.24 ( 0.83 - 1.84 )	1.24 ( 1.09 )
PAIN IN JAW	MUSCULOSKELETAL AND CONNECTIVE TISSUE DISORDERS	25	0.67 ( 0.45 - 1 )	0.67 ( 3.93 )
HAEMOGLOBIN ABNORMAL	INVESTIGATIONS	25	7.71 ( 5.02 - 11.84 )	7.71 ( 122.18 )
HYPERSOMNIA	NERVOUS SYSTEM DISORDERS	25	1.37 ( 0.92 - 2.03 )	1.37 ( 2.36 )
CATHETERISATION CARDIAC	INVESTIGATIONS	25	5.55 ( 3.65 - 8.43 )	5.55 ( 81.68 )
SEASONAL ALLERGY	IMMUNE SYSTEM DISORDERS	25	1.12 ( 0.75 - 1.66 )	1.12 ( 0.29 )
CARDIOVASCULAR DISORDER	CARDIAC DISORDERS	25	1.27 ( 0.85 - 1.89 )	1.27 ( 1.39 )
RENAL CANCER	NEOPLASMS BENIGN, MALIGNANT AND UNSPECIFIED (INCL CYSTS AND POLYPS)	25	2.4 ( 1.6 - 3.6 )	2.4 ( 19.28 )
PAPULE	SKIN AND SUBCUTANEOUS TISSUE DISORDERS	25	2.68 ( 1.78 - 4.01 )	2.68 ( 24.56 )
MEDICAL DEVICE REMOVAL	SURGICAL AND MEDICAL PROCEDURES	25	7.96 ( 5.18 - 12.24 )	7.96 ( 126.63 )
RECTAL HAEMORRHAGE	GASTROINTESTINAL DISORDERS	25	0.82 ( 0.55 - 1.21 )	0.82 ( 1.03 )
MENTAL DISORDER	PSYCHIATRIC DISORDERS	25	1.35 ( 0.91 - 2.01 )	1.35 ( 2.2 )
CORONARY ARTERY DISEASE	CARDIAC DISORDERS	25	0.87 ( 0.59 - 1.3 )	0.87 ( 0.44 )
MOVEMENT DISORDER	NERVOUS SYSTEM DISORDERS	25	0.68 ( 0.45 - 1 )	0.68 ( 3.84 )
SCAR	INJURY, POISONING AND PROCEDURAL COMPLICATIONS	25	1.19 ( 0.8 - 1.77 )	1.19 ( 0.71 )
FURUNCLE	INFECTIONS AND INFESTATIONS	25	0.98 ( 0.66 - 1.46 )	0.98 ( 0.01 )
MULTIPLE FRACTURES	INJURY, POISONING AND PROCEDURAL COMPLICATIONS	25	2.35 ( 1.57 - 3.51 )	2.34 ( 18.2 )
PRODUCT STORAGE ERROR	INJURY, POISONING AND PROCEDURAL COMPLICATIONS	24	0.41 ( 0.27 - 0.61 )	0.41 ( 20.07 )
GASTRIC BYPASS	SURGICAL AND MEDICAL PROCEDURES	24	7.77 ( 5.02 - 12.04 )	7.77 ( 118.25 )
COLITIS ULCERATIVE	GASTROINTESTINAL DISORDERS	24	0.99 ( 0.66 - 1.49 )	0.99 ( 0 )
BLOOD GLUCOSE DECREASED	INVESTIGATIONS	24	1.37 ( 0.91 - 2.06 )	1.37 ( 2.35 )
APPENDICECTOMY	SURGICAL AND MEDICAL PROCEDURES	24	4.74 ( 3.1 - 7.24 )	4.74 ( 63.2 )
PANIC ATTACK	PSYCHIATRIC DISORDERS	24	1.35 ( 0.9 - 2.02 )	1.35 ( 2.06 )
GASTRIC INFECTION	INFECTIONS AND INFESTATIONS	24	1.92 ( 1.28 - 2.9 )	1.92 ( 10.13 )
LOW DENSITY LIPOPROTEIN INCREASED	INVESTIGATIONS	24	4.96 ( 3.25 - 7.59 )	4.96 ( 67.44 )
DEPRESSED MOOD	PSYCHIATRIC DISORDERS	24	0.44 ( 0.29 - 0.65 )	0.44 ( 17.4 )
ORAL CANDIDIASIS	INFECTIONS AND INFESTATIONS	24	1.2 ( 0.8 - 1.81 )	1.2 ( 0.79 )
GENERAL SYMPTOM	GENERAL DISORDERS AND ADMINISTRATION SITE CONDITIONS	24	3.51 ( 2.31 - 5.33 )	3.51 ( 39.56 )
BLADDER CANCER	NEOPLASMS BENIGN, MALIGNANT AND UNSPECIFIED (INCL CYSTS AND POLYPS)	24	1.45 ( 0.97 - 2.18 )	1.45 ( 3.25 )
RED BLOOD CELL SEDIMENTATION RATE INCREASED	INVESTIGATIONS	24	0.25 ( 0.17 - 0.37 )	0.25 ( 53.85 )
HERPES VIRUS INFECTION	INFECTIONS AND INFESTATIONS	24	1.44 ( 0.96 - 2.16 )	1.44 ( 3.12 )
PROCEDURAL COMPLICATION	INJURY, POISONING AND PROCEDURAL COMPLICATIONS	24	1.65 ( 1.09 - 2.48 )	1.65 ( 5.83 )
SKIN LESION	SKIN AND SUBCUTANEOUS TISSUE DISORDERS	24	0.56 ( 0.37 - 0.84 )	0.56 ( 8.13 )
SLEEP DISORDER	PSYCHIATRIC DISORDERS	24	0.22 ( 0.15 - 0.33 )	0.22 ( 65.05 )
INCORRECT DOSE ADMINISTERED	INJURY, POISONING AND PROCEDURAL COMPLICATIONS	23	0.1 ( 0.07 - 0.15 )	0.1 ( 180.74 )
LYMPHOCYTE COUNT DECREASED	INVESTIGATIONS	23	2.83 ( 1.85 - 4.32 )	2.83 ( 25.38 )
DIVERTICULUM	GASTROINTESTINAL DISORDERS	23	1.52 ( 1 - 2.31 )	1.52 ( 3.95 )
VITAMIN D DECREASED	INVESTIGATIONS	23	1.46 ( 0.96 - 2.21 )	1.46 ( 3.22 )
INFARCTION	VASCULAR DISORDERS	23	1.95 ( 1.28 - 2.96 )	1.95 ( 10.13 )
HEART RATE DECREASED	INVESTIGATIONS	23	0.34 ( 0.23 - 0.52 )	0.34 ( 28.64 )
GASTRIC HAEMORRHAGE	GASTROINTESTINAL DISORDERS	23	2.47 ( 1.62 - 3.76 )	2.47 ( 18.9 )
SURGICAL FAILURE	GENERAL DISORDERS AND ADMINISTRATION SITE CONDITIONS	23	3.12 ( 2.04 - 4.77 )	3.12 ( 30.72 )
RASH MACULAR	SKIN AND SUBCUTANEOUS TISSUE DISORDERS	23	0.5 ( 0.33 - 0.75 )	0.5 ( 11.43 )
DEVICE DISLOCATION	PRODUCT ISSUES	23	1.83 ( 1.21 - 2.79 )	1.83 ( 8.35 )
ANTIBIOTIC THERAPY	SURGICAL AND MEDICAL PROCEDURES	23	2.77 ( 1.81 - 4.23 )	2.77 ( 24.29 )
WEIGHT BEARING DIFFICULTY	MUSCULOSKELETAL AND CONNECTIVE TISSUE DISORDERS	23	2.92 ( 1.91 - 4.46 )	2.92 ( 27.04 )
MUSCLE ATROPHY	MUSCULOSKELETAL AND CONNECTIVE TISSUE DISORDERS	23	2.18 ( 1.43 - 3.31 )	2.18 ( 13.89 )
APHASIA	NERVOUS SYSTEM DISORDERS	22	1.25 ( 0.82 - 1.91 )	1.25 ( 1.04 )
LARGE INTESTINE PERFORATION	GASTROINTESTINAL DISORDERS	22	2.26 ( 1.47 - 3.48 )	2.26 ( 14.65 )
FUNGAL SKIN INFECTION	INFECTIONS AND INFESTATIONS	22	1.76 ( 1.15 - 2.7 )	1.76 ( 6.94 )
ABSCESS LIMB	INFECTIONS AND INFESTATIONS	22	1.79 ( 1.17 - 2.75 )	1.79 ( 7.41 )
UTERINE LEIOMYOMA	NEOPLASMS BENIGN, MALIGNANT AND UNSPECIFIED (INCL CYSTS AND POLYPS)	22	1.51 ( 0.99 - 2.31 )	1.51 ( 3.66 )
EPILEPSY	NERVOUS SYSTEM DISORDERS	22	1.13 ( 0.74 - 1.72 )	1.13 ( 0.3 )
BLOOD CHOLESTEROL ABNORMAL	INVESTIGATIONS	22	2.33 ( 1.51 - 3.58 )	2.33 ( 15.75 )
SKIN MASS	SKIN AND SUBCUTANEOUS TISSUE DISORDERS	22	1.37 ( 0.9 - 2.1 )	1.37 ( 2.15 )
OCULAR DISCOMFORT	EYE DISORDERS	22	3.83 ( 2.47 - 5.93 )	3.83 ( 41.88 )
DEVICE LOOSENING	PRODUCT ISSUES	22	5.72 ( 3.66 - 8.94 )	5.71 ( 74.76 )
PNEUMOTHORAX	RESPIRATORY, THORACIC AND MEDIASTINAL DISORDERS	22	1.03 ( 0.68 - 1.58 )	1.03 ( 0.02 )
CARTILAGE ATROPHY	MUSCULOSKELETAL AND CONNECTIVE TISSUE DISORDERS	22	2.54 ( 1.65 - 3.91 )	2.54 ( 19.3 )
MUSCLE TIGHTNESS	MUSCULOSKELETAL AND CONNECTIVE TISSUE DISORDERS	22	1.61 ( 1.05 - 2.47 )	1.61 ( 4.91 )
VITREOUS FLOATERS	EYE DISORDERS	22	3.18 ( 2.06 - 4.91 )	3.18 ( 30.46 )
BLOOD PRESSURE FLUCTUATION	VASCULAR DISORDERS	22	0.28 ( 0.18 - 0.42 )	0.28 ( 41.13 )
SPINAL CORD COMPRESSION	NERVOUS SYSTEM DISORDERS	22	3.28 ( 2.12 - 5.06 )	3.28 ( 32.16 )
DYSPNOEA EXERTIONAL	RESPIRATORY, THORACIC AND MEDIASTINAL DISORDERS	22	0.84 ( 0.55 - 1.29 )	0.84 ( 0.62 )
PRODUCT USE ISSUE	INJURY, POISONING AND PROCEDURAL COMPLICATIONS	22	0.09 ( 0.06 - 0.14 )	0.09 ( 191.48 )
ELBOW OPERATION	SURGICAL AND MEDICAL PROCEDURES	22	5.05 ( 3.24 - 7.87 )	5.05 ( 63.36 )
DEAFNESS UNILATERAL	EAR AND LABYRINTH DISORDERS	21	2.54 ( 1.64 - 3.95 )	2.54 ( 18.48 )
THORACIC VERTEBRAL FRACTURE	INJURY, POISONING AND PROCEDURAL COMPLICATIONS	21	3.79 ( 2.42 - 5.93 )	3.79 ( 39.29 )
HEAD DISCOMFORT	NERVOUS SYSTEM DISORDERS	21	1.26 ( 0.82 - 1.95 )	1.26 ( 1.12 )
ORAL PAIN	GASTROINTESTINAL DISORDERS	21	0.77 ( 0.5 - 1.18 )	0.77 ( 1.44 )
STRESS FRACTURE	INJURY, POISONING AND PROCEDURAL COMPLICATIONS	21	1.76 ( 1.14 - 2.73 )	1.76 ( 6.6 )
POLYP	GENERAL DISORDERS AND ADMINISTRATION SITE CONDITIONS	21	1.69 ( 1.09 - 2.61 )	1.69 ( 5.61 )
NERVOUSNESS	PSYCHIATRIC DISORDERS	21	0.47 ( 0.31 - 0.73 )	0.47 ( 12.27 )
SUSPECTED COVID-19	INFECTIONS AND INFESTATIONS	21	2.92 ( 1.87 - 4.55 )	2.92 ( 24.68 )
ABDOMINAL PAIN LOWER	GASTROINTESTINAL DISORDERS	21	1.36 ( 0.88 - 2.1 )	1.36 ( 1.95 )
HALLUCINATION	PSYCHIATRIC DISORDERS	21	1.48 ( 0.95 - 2.28 )	1.48 ( 3.1 )
LYMPHOEDEMA	VASCULAR DISORDERS	21	2.29 ( 1.48 - 3.56 )	2.29 ( 14.43 )
PNEUMONIA VIRAL	INFECTIONS AND INFESTATIONS	20	2.15 ( 1.37 - 3.37 )	2.15 ( 11.61 )
LUMBAR SPINAL STENOSIS	MUSCULOSKELETAL AND CONNECTIVE TISSUE DISORDERS	20	2.06 ( 1.32 - 3.23 )	2.06 ( 10.39 )
ULCER HAEMORRHAGE	GENERAL DISORDERS AND ADMINISTRATION SITE CONDITIONS	20	1.55 ( 0.99 - 2.42 )	1.55 ( 3.7 )
CARDIOMEGALY	CARDIAC DISORDERS	20	1.49 ( 0.95 - 2.32 )	1.49 ( 3.08 )
FAECES DISCOLOURED	GASTROINTESTINAL DISORDERS	20	1.41 ( 0.9 - 2.2 )	1.41 ( 2.28 )
ABORTION SPONTANEOUS	PREGNANCY, PUERPERIUM AND PERINATAL CONDITIONS	20	0.61 ( 0.39 - 0.94 )	0.61 ( 5.05 )
OVARIAN CYST	REPRODUCTIVE SYSTEM AND BREAST DISORDERS	20	1.02 ( 0.65 - 1.59 )	1.02 ( 0.01 )
DEVICE RELATED INFECTION	INFECTIONS AND INFESTATIONS	20	1.07 ( 0.69 - 1.68 )	1.07 ( 0.1 )
SPINAL NERVE STIMULATOR IMPLANTATION	SURGICAL AND MEDICAL PROCEDURES	20	20.79 ( 12.09 - 35.72 )	20.78 ( 246.73 )
COMA	NERVOUS SYSTEM DISORDERS	20	1.05 ( 0.68 - 1.64 )	1.05 ( 0.05 )
MENINGITIS	INFECTIONS AND INFESTATIONS	20	1.76 ( 1.12 - 2.75 )	1.76 ( 6.27 )
OBSTRUCTION	GENERAL DISORDERS AND ADMINISTRATION SITE CONDITIONS	20	7.9 ( 4.89 - 12.77 )	7.9 ( 100.39 )
VEIN RUPTURE	VASCULAR DISORDERS	20	6.08 ( 3.79 - 9.73 )	6.07 ( 73.48 )
COMPLICATION ASSOCIATED WITH DEVICE	GENERAL DISORDERS AND ADMINISTRATION SITE CONDITIONS	20	3.76 ( 2.38 - 5.95 )	3.76 ( 37 )
DENGUE FEVER	INFECTIONS AND INFESTATIONS	20	2.07 ( 1.32 - 3.24 )	2.07 ( 10.47 )
ANAPHYLACTIC REACTION	IMMUNE SYSTEM DISORDERS	19	0.41 ( 0.26 - 0.65 )	0.41 ( 15.75 )
DELIRIUM	PSYCHIATRIC DISORDERS	19	0.75 ( 0.47 - 1.18 )	0.75 ( 1.6 )
OCULAR HYPERAEMIA	EYE DISORDERS	19	0.6 ( 0.38 - 0.94 )	0.6 ( 5.1 )
BREAST MASS	REPRODUCTIVE SYSTEM AND BREAST DISORDERS	19	1.13 ( 0.71 - 1.78 )	1.13 ( 0.26 )
SUBCUTANEOUS ABSCESS	INFECTIONS AND INFESTATIONS	19	1.68 ( 1.06 - 2.66 )	1.68 ( 5.04 )
INAPPROPRIATE SCHEDULE OF PRODUCT ADMINISTRATION	INJURY, POISONING AND PROCEDURAL COMPLICATIONS	19	0.2 ( 0.12 - 0.31 )	0.2 ( 62.49 )
DRUG INTERACTION	GENERAL DISORDERS AND ADMINISTRATION SITE CONDITIONS	19	0.29 ( 0.19 - 0.46 )	0.29 ( 32.1 )
TYPE 2 DIABETES MELLITUS	METABOLISM AND NUTRITION DISORDERS	19	0.25 ( 0.16 - 0.39 )	0.25 ( 42.45 )
PLANTAR FASCIITIS	MUSCULOSKELETAL AND CONNECTIVE TISSUE DISORDERS	19	2.72 ( 1.71 - 4.33 )	2.72 ( 19.31 )
HYPOXIA	RESPIRATORY, THORACIC AND MEDIASTINAL DISORDERS	19	1.29 ( 0.82 - 2.04 )	1.29 ( 1.19 )
SCRATCH	INJURY, POISONING AND PROCEDURAL COMPLICATIONS	19	1.16 ( 0.73 - 1.83 )	1.16 ( 0.4 )
LARYNGITIS	INFECTIONS AND INFESTATIONS	19	0.48 ( 0.31 - 0.76 )	0.48 ( 10.31 )
PANCREATIC CARCINOMA	NEOPLASMS BENIGN, MALIGNANT AND UNSPECIFIED (INCL CYSTS AND POLYPS)	19	1.51 ( 0.95 - 2.39 )	1.51 ( 3.15 )
DERMAL CYST	SKIN AND SUBCUTANEOUS TISSUE DISORDERS	19	2.87 ( 1.8 - 4.58 )	2.87 ( 21.65 )
NERVOUS SYSTEM DISORDER	NERVOUS SYSTEM DISORDERS	19	0.92 ( 0.59 - 1.45 )	0.92 ( 0.12 )
HYPONATRAEMIA	METABOLISM AND NUTRITION DISORDERS	19	1.14 ( 0.72 - 1.8 )	1.14 ( 0.33 )
HAEMATEMESIS	GASTROINTESTINAL DISORDERS	19	1.22 ( 0.78 - 1.93 )	1.22 ( 0.75 )
TUBERCULOSIS	INFECTIONS AND INFESTATIONS	19	0.31 ( 0.2 - 0.49 )	0.31 ( 28.31 )
METABOLIC SURGERY	SURGICAL AND MEDICAL PROCEDURES	19	7.5 ( 4.59 - 12.25 )	7.5 ( 89.98 )
DRY THROAT	RESPIRATORY, THORACIC AND MEDIASTINAL DISORDERS	19	1.43 ( 0.9 - 2.25 )	1.43 ( 2.34 )
GASTRIC CANCER	NEOPLASMS BENIGN, MALIGNANT AND UNSPECIFIED (INCL CYSTS AND POLYPS)	19	1.67 ( 1.06 - 2.64 )	1.67 ( 4.91 )
LUNG OPACITY	RESPIRATORY, THORACIC AND MEDIASTINAL DISORDERS	19	13.9 ( 8.24 - 23.44 )	13.89 ( 168.16 )
DEVICE BREAKAGE	PRODUCT ISSUES	19	1.77 ( 1.12 - 2.81 )	1.77 ( 6.13 )
DYSARTHRIA	NERVOUS SYSTEM DISORDERS	18	1.15 ( 0.72 - 1.83 )	1.15 ( 0.33 )
UPPER-AIRWAY COUGH SYNDROME	RESPIRATORY, THORACIC AND MEDIASTINAL DISORDERS	18	1.17 ( 0.73 - 1.87 )	1.17 ( 0.44 )
GASTROINTESTINAL PERFORATION	GASTROINTESTINAL DISORDERS	18	3.55 ( 2.19 - 5.76 )	3.55 ( 30.3 )
RHEUMATOID NODULE	MUSCULOSKELETAL AND CONNECTIVE TISSUE DISORDERS	18	0.31 ( 0.2 - 0.5 )	0.31 ( 26.89 )
CEREBRAL INFARCTION	NERVOUS SYSTEM DISORDERS	18	1 ( 0.63 - 1.6 )	1 ( 0 )
PRE-EXISTING CONDITION IMPROVED	GENERAL DISORDERS AND ADMINISTRATION SITE CONDITIONS	18	2.35 ( 1.46 - 3.79 )	2.35 ( 13.22 )
RENAL PAIN	RENAL AND URINARY DISORDERS	18	1.56 ( 0.97 - 2.5 )	1.56 ( 3.47 )
GASTRECTOMY	SURGICAL AND MEDICAL PROCEDURES	18	12.92 ( 7.59 - 22.01 )	12.92 ( 149.17 )
DISORIENTATION	PSYCHIATRIC DISORDERS	18	1.12 ( 0.7 - 1.8 )	1.12 ( 0.24 )
HOSPICE CARE	SURGICAL AND MEDICAL PROCEDURES	18	10.15 ( 6.05 - 17.05 )	10.15 ( 118.15 )
ORAL INFECTION	INFECTIONS AND INFESTATIONS	18	1.38 ( 0.86 - 2.2 )	1.38 ( 1.8 )
LIMB MASS	MUSCULOSKELETAL AND CONNECTIVE TISSUE DISORDERS	18	1.62 ( 1.01 - 2.6 )	1.62 ( 4.13 )
CHONDROPATHY	MUSCULOSKELETAL AND CONNECTIVE TISSUE DISORDERS	18	0.89 ( 0.56 - 1.42 )	0.89 ( 0.24 )
FOOD POISONING	GASTROINTESTINAL DISORDERS	18	1.96 ( 1.22 - 3.15 )	1.96 ( 8.1 )
INTERVERTEBRAL DISC DISORDER	MUSCULOSKELETAL AND CONNECTIVE TISSUE DISORDERS	18	1.37 ( 0.86 - 2.19 )	1.37 ( 1.73 )
SCAB	SKIN AND SUBCUTANEOUS TISSUE DISORDERS	18	1.09 ( 0.68 - 1.75 )	1.09 ( 0.14 )
MELANOCYTIC NAEVUS	NEOPLASMS BENIGN, MALIGNANT AND UNSPECIFIED (INCL CYSTS AND POLYPS)	18	1.73 ( 1.08 - 2.77 )	1.73 ( 5.3 )
GASTRIC PERFORATION	GASTROINTESTINAL DISORDERS	18	5.78 ( 3.52 - 9.48 )	5.78 ( 62.04 )
DRUG-INDUCED LIVER INJURY	HEPATOBILIARY DISORDERS	18	0.58 ( 0.36 - 0.92 )	0.58 ( 5.49 )
HEPATIC FUNCTION ABNORMAL	HEPATOBILIARY DISORDERS	18	0.81 ( 0.51 - 1.29 )	0.81 ( 0.81 )
CRYING	GENERAL DISORDERS AND ADMINISTRATION SITE CONDITIONS	18	0.87 ( 0.54 - 1.38 )	0.87 ( 0.36 )
CROHN'S DISEASE	GASTROINTESTINAL DISORDERS	18	0.39 ( 0.25 - 0.62 )	0.39 ( 16.86 )
SHOULDER FRACTURE	INJURY, POISONING AND PROCEDURAL COMPLICATIONS	18	9.23 ( 5.53 - 15.42 )	9.23 ( 107.06 )
PARALYSIS	NERVOUS SYSTEM DISORDERS	17	1.42 ( 0.87 - 2.3 )	1.42 ( 2.03 )
FACIAL PAIN	GENERAL DISORDERS AND ADMINISTRATION SITE CONDITIONS	17	1.5 ( 0.93 - 2.44 )	1.5 ( 2.74 )
CONJUNCTIVITIS	INFECTIONS AND INFESTATIONS	17	0.77 ( 0.48 - 1.24 )	0.77 ( 1.16 )
HAEMATOCRIT DECREASED	INVESTIGATIONS	17	1 ( 0.62 - 1.61 )	1 ( 0 )
ABDOMINAL HERNIA	GASTROINTESTINAL DISORDERS	17	1.49 ( 0.92 - 2.42 )	1.49 ( 2.65 )
DERMATITIS	SKIN AND SUBCUTANEOUS TISSUE DISORDERS	17	0.93 ( 0.58 - 1.51 )	0.93 ( 0.09 )
PATELLA FRACTURE	INJURY, POISONING AND PROCEDURAL COMPLICATIONS	17	3.14 ( 1.91 - 5.14 )	3.14 ( 22.92 )
BRAIN NEOPLASM	NEOPLASMS BENIGN, MALIGNANT AND UNSPECIFIED (INCL CYSTS AND POLYPS)	17	1.35 ( 0.83 - 2.19 )	1.35 ( 1.5 )
NEOPLASM	NEOPLASMS BENIGN, MALIGNANT AND UNSPECIFIED (INCL CYSTS AND POLYPS)	17	0.93 ( 0.57 - 1.5 )	0.93 ( 0.09 )
PLEURISY	RESPIRATORY, THORACIC AND MEDIASTINAL DISORDERS	17	0.69 ( 0.43 - 1.12 )	0.69 ( 2.27 )
TRANSFUSION	SURGICAL AND MEDICAL PROCEDURES	17	3.59 ( 2.18 - 5.9 )	3.59 ( 29.11 )
INGROWING NAIL	SKIN AND SUBCUTANEOUS TISSUE DISORDERS	17	2.25 ( 1.38 - 3.67 )	2.25 ( 11.2 )
EXPOSURE TO SARS-COV-2	INJURY, POISONING AND PROCEDURAL COMPLICATIONS	17	3.79 ( 2.31 - 6.24 )	3.79 ( 31.89 )
C-REACTIVE PROTEIN ABNORMAL	INVESTIGATIONS	17	0.19 ( 0.12 - 0.3 )	0.19 ( 60.03 )
DRUG INTOLERANCE	GENERAL DISORDERS AND ADMINISTRATION SITE CONDITIONS	17	0.04 ( 0.02 - 0.06 )	0.04 ( 433.96 )
TENDON INJURY	INJURY, POISONING AND PROCEDURAL COMPLICATIONS	17	2.19 ( 1.35 - 3.58 )	2.19 ( 10.46 )
PERICARDITIS	CARDIAC DISORDERS	17	0.13 ( 0.08 - 0.21 )	0.13 ( 99.2 )
SKIN PAPILLOMA	NEOPLASMS BENIGN, MALIGNANT AND UNSPECIFIED (INCL CYSTS AND POLYPS)	17	1.34 ( 0.83 - 2.18 )	1.34 ( 1.44 )
DECUBITUS ULCER	SKIN AND SUBCUTANEOUS TISSUE DISORDERS	17	1.58 ( 0.97 - 2.56 )	1.58 ( 3.47 )
PLASMA CELL MYELOMA	NEOPLASMS BENIGN, MALIGNANT AND UNSPECIFIED (INCL CYSTS AND POLYPS)	17	2.22 ( 1.36 - 3.61 )	2.22 ( 10.73 )
PANCREATITIS ACUTE	GASTROINTESTINAL DISORDERS	17	1.71 ( 1.05 - 2.78 )	1.71 ( 4.78 )
GINGIVITIS	INFECTIONS AND INFESTATIONS	17	1.33 ( 0.82 - 2.16 )	1.33 ( 1.34 )
DENTAL CARIES	GASTROINTESTINAL DISORDERS	17	0.77 ( 0.48 - 1.24 )	0.77 ( 1.15 )
BACTERAEMIA	INFECTIONS AND INFESTATIONS	17	2.02 ( 1.24 - 3.28 )	2.02 ( 8.28 )
BONE OPERATION	SURGICAL AND MEDICAL PROCEDURES	17	10.17 ( 5.97 - 17.34 )	10.17 ( 111.77 )
ESCHERICHIA INFECTION	INFECTIONS AND INFESTATIONS	17	1.4 ( 0.86 - 2.27 )	1.4 ( 1.86 )
FULL BLOOD COUNT ABNORMAL	INVESTIGATIONS	17	3.9 ( 2.37 - 6.42 )	3.9 ( 33.4 )
LIVER INJURY	HEPATOBILIARY DISORDERS	17	0.27 ( 0.17 - 0.44 )	0.27 ( 32.91 )
TOXICITY TO VARIOUS AGENTS	INJURY, POISONING AND PROCEDURAL COMPLICATIONS	16	0.37 ( 0.23 - 0.61 )	0.37 ( 16.94 )
THROAT TIGHTNESS	RESPIRATORY, THORACIC AND MEDIASTINAL DISORDERS	16	0.72 ( 0.44 - 1.18 )	0.72 ( 1.71 )
SWOLLEN TONGUE	GASTROINTESTINAL DISORDERS	16	0.76 ( 0.46 - 1.24 )	0.76 ( 1.23 )
PERIPHERAL COLDNESS	VASCULAR DISORDERS	16	1.11 ( 0.68 - 1.83 )	1.11 ( 0.18 )
SNEEZING	RESPIRATORY, THORACIC AND MEDIASTINAL DISORDERS	16	0.4 ( 0.25 - 0.66 )	0.4 ( 13.9 )
ANIMAL BITE	INJURY, POISONING AND PROCEDURAL COMPLICATIONS	16	1.45 ( 0.88 - 2.39 )	1.45 ( 2.15 )
PERIPHERAL VENOUS DISEASE	VASCULAR DISORDERS	16	0.68 ( 0.41 - 1.11 )	0.68 ( 2.41 )
FREQUENT BOWEL MOVEMENTS	GASTROINTESTINAL DISORDERS	16	1.16 ( 0.71 - 1.91 )	1.16 ( 0.35 )
HEART RATE IRREGULAR	INVESTIGATIONS	16	0.64 ( 0.39 - 1.04 )	0.64 ( 3.25 )
GASTROINTESTINAL PAIN	GASTROINTESTINAL DISORDERS	16	1.06 ( 0.65 - 1.75 )	1.06 ( 0.06 )
RETCHING	GASTROINTESTINAL DISORDERS	16	1.45 ( 0.88 - 2.39 )	1.45 ( 2.17 )
ANOSMIA	NERVOUS SYSTEM DISORDERS	16	2.42 ( 1.46 - 4.01 )	2.42 ( 12.57 )
CERVICAL VERTEBRAL FRACTURE	INJURY, POISONING AND PROCEDURAL COMPLICATIONS	16	2.51 ( 1.51 - 4.16 )	2.51 ( 13.63 )
DEMENTIA	NERVOUS SYSTEM DISORDERS	16	0.72 ( 0.44 - 1.19 )	0.72 ( 1.66 )
SECRETION DISCHARGE	GENERAL DISORDERS AND ADMINISTRATION SITE CONDITIONS	16	0.75 ( 0.46 - 1.24 )	0.75 ( 1.26 )
TASTE DISORDER	NERVOUS SYSTEM DISORDERS	16	1.6 ( 0.97 - 2.63 )	1.6 ( 3.42 )
BLOOD CALCIUM INCREASED	INVESTIGATIONS	16	2.88 ( 1.74 - 4.79 )	2.88 ( 18.36 )
EYE HAEMORRHAGE	EYE DISORDERS	16	1.17 ( 0.71 - 1.92 )	1.17 ( 0.38 )
LUNG NEOPLASM	NEOPLASMS BENIGN, MALIGNANT AND UNSPECIFIED (INCL CYSTS AND POLYPS)	16	1.08 ( 0.66 - 1.78 )	1.08 ( 0.1 )
CHEMOTHERAPY	SURGICAL AND MEDICAL PROCEDURES	16	3.53 ( 2.12 - 5.89 )	3.53 ( 26.62 )
PRODUCT RESIDUE PRESENT	INVESTIGATIONS	16	10.19 ( 5.88 - 17.66 )	10.19 ( 105.4 )
MULTIPLE ALLERGIES	IMMUNE SYSTEM DISORDERS	16	1.45 ( 0.88 - 2.39 )	1.45 ( 2.15 )
DISCOURAGEMENT	PSYCHIATRIC DISORDERS	16	0.83 ( 0.51 - 1.36 )	0.83 ( 0.55 )
LEUKOPENIA	BLOOD AND LYMPHATIC SYSTEM DISORDERS	16	0.31 ( 0.19 - 0.51 )	0.31 ( 24.38 )
OVARIAN CANCER	NEOPLASMS BENIGN, MALIGNANT AND UNSPECIFIED (INCL CYSTS AND POLYPS)	16	1.32 ( 0.8 - 2.18 )	1.32 ( 1.21 )
FACIAL PARALYSIS	NERVOUS SYSTEM DISORDERS	15	1.66 ( 0.99 - 2.79 )	1.66 ( 3.81 )
OPHTHALMIC HERPES ZOSTER	INFECTIONS AND INFESTATIONS	15	2.75 ( 1.63 - 4.65 )	2.75 ( 15.67 )
LACRIMATION INCREASED	EYE DISORDERS	15	0.63 ( 0.38 - 1.05 )	0.63 ( 3.13 )
TOE OPERATION	SURGICAL AND MEDICAL PROCEDURES	15	2.86 ( 1.69 - 4.83 )	2.86 ( 16.93 )
EMBOLISM VENOUS	VASCULAR DISORDERS	15	12.88 ( 7.19 - 23.06 )	12.87 ( 123.89 )
UMBILICAL HERNIA	GASTROINTESTINAL DISORDERS	15	1.38 ( 0.83 - 2.32 )	1.38 ( 1.54 )
HYPOGLYCAEMIA	METABOLISM AND NUTRITION DISORDERS	15	1.01 ( 0.61 - 1.69 )	1.01 ( 0 )
SKIN HAEMORRHAGE	SKIN AND SUBCUTANEOUS TISSUE DISORDERS	15	1.04 ( 0.62 - 1.73 )	1.04 ( 0.02 )
CONCUSSION	INJURY, POISONING AND PROCEDURAL COMPLICATIONS	15	1.23 ( 0.74 - 2.06 )	1.23 ( 0.64 )
BLADDER OPERATION	SURGICAL AND MEDICAL PROCEDURES	15	4.49 ( 2.63 - 7.65 )	4.49 ( 36.5 )
WOUND HAEMORRHAGE	INJURY, POISONING AND PROCEDURAL COMPLICATIONS	15	2.64 ( 1.57 - 4.46 )	2.64 ( 14.37 )
ROSACEA	SKIN AND SUBCUTANEOUS TISSUE DISORDERS	15	2.04 ( 1.22 - 3.43 )	2.04 ( 7.59 )
NEUTROPHIL COUNT INCREASED	INVESTIGATIONS	15	2.48 ( 1.47 - 4.18 )	2.48 ( 12.44 )
OXYGEN SATURATION ABNORMAL	INVESTIGATIONS	15	4.23 ( 2.48 - 7.21 )	4.23 ( 33.42 )
INFECTION SUSCEPTIBILITY INCREASED	INFECTIONS AND INFESTATIONS	15	2.46 ( 1.46 - 4.14 )	2.46 ( 12.21 )
FOLLICULITIS	INFECTIONS AND INFESTATIONS	15	0.17 ( 0.1 - 0.28 )	0.17 ( 62.46 )
INTRACRANIAL ANEURYSM	NERVOUS SYSTEM DISORDERS	15	1.74 ( 1.04 - 2.92 )	1.74 ( 4.54 )
OVERWEIGHT	METABOLISM AND NUTRITION DISORDERS	15	2.36 ( 1.4 - 3.97 )	2.36 ( 11.09 )
DIPLOPIA	EYE DISORDERS	15	0.89 ( 0.53 - 1.48 )	0.89 ( 0.22 )
AUTOIMMUNE DISORDER	IMMUNE SYSTEM DISORDERS	15	0.51 ( 0.31 - 0.85 )	0.51 ( 6.95 )
ARTERIOSCLEROSIS	VASCULAR DISORDERS	15	1.89 ( 1.12 - 3.17 )	1.89 ( 5.96 )
AORTIC ANEURYSM	VASCULAR DISORDERS	15	1.11 ( 0.67 - 1.86 )	1.11 ( 0.17 )
SKIN FISSURES	SKIN AND SUBCUTANEOUS TISSUE DISORDERS	15	1.14 ( 0.68 - 1.9 )	1.14 ( 0.25 )
COGNITIVE DISORDER	NERVOUS SYSTEM DISORDERS	15	1.03 ( 0.62 - 1.73 )	1.03 ( 0.02 )
CLAVICLE FRACTURE	INJURY, POISONING AND PROCEDURAL COMPLICATIONS	15	2.13 ( 1.27 - 3.58 )	2.13 ( 8.54 )
OBESITY	METABOLISM AND NUTRITION DISORDERS	15	0.46 ( 0.28 - 0.77 )	0.46 ( 9.21 )
INTRAOCULAR PRESSURE INCREASED	INVESTIGATIONS	15	1.9 ( 1.13 - 3.2 )	1.9 ( 6.15 )
BLADDER DISORDER	RENAL AND URINARY DISORDERS	15	1.33 ( 0.79 - 2.22 )	1.33 ( 1.18 )
EAR DISCOMFORT	EAR AND LABYRINTH DISORDERS	15	0.96 ( 0.58 - 1.61 )	0.96 ( 0.02 )
BREAST PAIN	REPRODUCTIVE SYSTEM AND BREAST DISORDERS	15	1.49 ( 0.89 - 2.49 )	1.49 ( 2.31 )
POLYARTHRITIS	MUSCULOSKELETAL AND CONNECTIVE TISSUE DISORDERS	15	0.76 ( 0.45 - 1.26 )	0.76 ( 1.16 )
EMBOLISM	VASCULAR DISORDERS	15	2.7 ( 1.6 - 4.56 )	2.7 ( 15.08 )
ASPHYXIA	RESPIRATORY, THORACIC AND MEDIASTINAL DISORDERS	15	3.18 ( 1.88 - 5.39 )	3.18 ( 20.8 )
ENDODONTIC PROCEDURE	SURGICAL AND MEDICAL PROCEDURES	15	1.85 ( 1.1 - 3.11 )	1.85 ( 5.6 )
GENERALISED OEDEMA	GENERAL DISORDERS AND ADMINISTRATION SITE CONDITIONS	15	1.24 ( 0.74 - 2.08 )	1.24 ( 0.68 )
LIPIDS INCREASED	INVESTIGATIONS	14	5.07 ( 2.91 - 8.85 )	5.07 ( 40.55 )
PLATELET COUNT INCREASED	INVESTIGATIONS	14	1.26 ( 0.74 - 2.14 )	1.26 ( 0.71 )
INGUINAL HERNIA	GASTROINTESTINAL DISORDERS	14	1.1 ( 0.65 - 1.87 )	1.1 ( 0.12 )
PRESYNCOPE	NERVOUS SYSTEM DISORDERS	14	1.2 ( 0.7 - 2.04 )	1.2 ( 0.44 )
APHTHOUS ULCER	GASTROINTESTINAL DISORDERS	14	0.92 ( 0.54 - 1.57 )	0.92 ( 0.09 )
COLD SWEAT	SKIN AND SUBCUTANEOUS TISSUE DISORDERS	14	1.08 ( 0.64 - 1.84 )	1.08 ( 0.09 )
SINUS HEADACHE	NERVOUS SYSTEM DISORDERS	14	0.67 ( 0.4 - 1.14 )	0.67 ( 2.21 )
SYNOVITIS	MUSCULOSKELETAL AND CONNECTIVE TISSUE DISORDERS	14	0.05 ( 0.03 - 0.09 )	0.05 ( 246.47 )
CHOKING	RESPIRATORY, THORACIC AND MEDIASTINAL DISORDERS	14	1.29 ( 0.75 - 2.19 )	1.29 ( 0.86 )
FIBRIN D DIMER INCREASED	INVESTIGATIONS	14	4.32 ( 2.49 - 7.5 )	4.32 ( 32.18 )
DENTAL CARE	SURGICAL AND MEDICAL PROCEDURES	14	3.74 ( 2.16 - 6.46 )	3.73 ( 25.62 )
INCISION SITE PAIN	INJURY, POISONING AND PROCEDURAL COMPLICATIONS	14	4.32 ( 2.49 - 7.5 )	4.32 ( 32.18 )
HORDEOLUM	INFECTIONS AND INFESTATIONS	14	2.36 ( 1.38 - 4.05 )	2.36 ( 10.38 )
DYSGRAPHIA	NERVOUS SYSTEM DISORDERS	14	2.6 ( 1.51 - 4.46 )	2.6 ( 12.88 )
IRRITABLE BOWEL SYNDROME	GASTROINTESTINAL DISORDERS	14	0.14 ( 0.08 - 0.24 )	0.14 ( 74.08 )
FLUID INTAKE REDUCED	METABOLISM AND NUTRITION DISORDERS	14	4.61 ( 2.65 - 8.01 )	4.61 ( 35.4 )
TOOTH LOSS	GASTROINTESTINAL DISORDERS	14	1.15 ( 0.68 - 1.96 )	1.15 ( 0.28 )
SKIN IRRITATION	SKIN AND SUBCUTANEOUS TISSUE DISORDERS	14	1.15 ( 0.67 - 1.95 )	1.15 ( 0.26 )
SKIN ABRASION	INJURY, POISONING AND PROCEDURAL COMPLICATIONS	14	1.57 ( 0.92 - 2.67 )	1.57 ( 2.75 )
ISCHAEMIC STROKE	NERVOUS SYSTEM DISORDERS	14	1.34 ( 0.78 - 2.27 )	1.34 ( 1.14 )
PROCEDURAL HAEMORRHAGE	INJURY, POISONING AND PROCEDURAL COMPLICATIONS	13	4.01 ( 2.27 - 7.1 )	4.01 ( 26.67 )
LIP SWELLING	GASTROINTESTINAL DISORDERS	13	0.58 ( 0.33 - 1 )	0.58 ( 3.91 )
HEPATIC CANCER	NEOPLASMS BENIGN, MALIGNANT AND UNSPECIFIED (INCL CYSTS AND POLYPS)	13	1.81 ( 1.04 - 3.15 )	1.81 ( 4.48 )
HEPATITIS	HEPATOBILIARY DISORDERS	13	0.31 ( 0.18 - 0.53 )	0.31 ( 20.19 )
BODY HEIGHT DECREASED	INVESTIGATIONS	13	0.8 ( 0.46 - 1.39 )	0.8 ( 0.61 )
DIARRHOEA HAEMORRHAGIC	GASTROINTESTINAL DISORDERS	13	2.05 ( 1.17 - 3.57 )	2.04 ( 6.6 )
DISTURBANCE IN ATTENTION	NERVOUS SYSTEM DISORDERS	13	0.77 ( 0.45 - 1.34 )	0.77 ( 0.85 )
COLITIS ISCHAEMIC	GASTROINTESTINAL DISORDERS	13	1.94 ( 1.11 - 3.38 )	1.94 ( 5.62 )
ERUCTATION	GASTROINTESTINAL DISORDERS	13	1.66 ( 0.95 - 2.89 )	1.66 ( 3.28 )
BONE LOSS	MUSCULOSKELETAL AND CONNECTIVE TISSUE DISORDERS	13	1.76 ( 1.01 - 3.06 )	1.76 ( 4.07 )
LEUKAEMIA	NEOPLASMS BENIGN, MALIGNANT AND UNSPECIFIED (INCL CYSTS AND POLYPS)	13	1.47 ( 0.85 - 2.56 )	1.47 ( 1.89 )
BLOOD MAGNESIUM DECREASED	INVESTIGATIONS	13	2.49 ( 1.42 - 4.36 )	2.49 ( 10.92 )
IMPAIRED DRIVING ABILITY	SOCIAL CIRCUMSTANCES	13	2.25 ( 1.29 - 3.94 )	2.25 ( 8.55 )
CHROMATURIA	RENAL AND URINARY DISORDERS	13	1.05 ( 0.61 - 1.82 )	1.05 ( 0.03 )
SPUTUM DISCOLOURED	RESPIRATORY, THORACIC AND MEDIASTINAL DISORDERS	13	0.59 ( 0.34 - 1.03 )	0.59 ( 3.54 )
NEUTROPHIL COUNT DECREASED	INVESTIGATIONS	13	0.94 ( 0.54 - 1.64 )	0.94 ( 0.04 )
KNEE DEFORMITY	MUSCULOSKELETAL AND CONNECTIVE TISSUE DISORDERS	13	1.8 ( 1.03 - 3.14 )	1.8 ( 4.43 )
HYPOTHYROIDISM	ENDOCRINE DISORDERS	13	0.47 ( 0.27 - 0.82 )	0.47 ( 7.56 )
VASCULAR RUPTURE	VASCULAR DISORDERS	13	2.81 ( 1.6 - 4.92 )	2.8 ( 14.1 )
TROPONIN INCREASED	INVESTIGATIONS	13	4.62 ( 2.6 - 8.22 )	4.62 ( 33.06 )
PALLOR	VASCULAR DISORDERS	13	0.76 ( 0.44 - 1.32 )	0.76 ( 0.92 )
HAEMATURIA	RENAL AND URINARY DISORDERS	13	0.81 ( 0.47 - 1.4 )	0.81 ( 0.57 )
PULMONARY PAIN	RESPIRATORY, THORACIC AND MEDIASTINAL DISORDERS	13	1.89 ( 1.08 - 3.29 )	1.89 ( 5.17 )
DIZZINESS POSTURAL	NERVOUS SYSTEM DISORDERS	13	2.63 ( 1.5 - 4.62 )	2.63 ( 12.34 )
COLECTOMY	SURGICAL AND MEDICAL PROCEDURES	13	3.8 ( 2.15 - 6.72 )	3.8 ( 24.49 )
LARGE INTESTINE POLYP	GASTROINTESTINAL DISORDERS	13	1.28 ( 0.74 - 2.22 )	1.28 ( 0.77 )
FEMORAL NECK FRACTURE	INJURY, POISONING AND PROCEDURAL COMPLICATIONS	13	1.62 ( 0.93 - 2.83 )	1.62 ( 3 )
EPIDURAL INJECTION	SURGICAL AND MEDICAL PROCEDURES	13	17.7 ( 9.2 - 34.05 )	17.7 ( 141.43 )
SKIN WARM	SKIN AND SUBCUTANEOUS TISSUE DISORDERS	13	1.45 ( 0.84 - 2.53 )	1.45 ( 1.78 )
CAROTID ARTERY OCCLUSION	NERVOUS SYSTEM DISORDERS	13	2.17 ( 1.24 - 3.79 )	2.17 ( 7.73 )
EMPHYSEMA	RESPIRATORY, THORACIC AND MEDIASTINAL DISORDERS	13	0.63 ( 0.36 - 1.09 )	0.63 ( 2.76 )
THROMBOCYTOPENIA	BLOOD AND LYMPHATIC SYSTEM DISORDERS	13	0.24 ( 0.14 - 0.41 )	0.24 ( 31.17 )
VARICOSE VEIN	VASCULAR DISORDERS	13	1.01 ( 0.58 - 1.75 )	1.01 ( 0 )
IMPAIRED QUALITY OF LIFE	SOCIAL CIRCUMSTANCES	13	2.44 ( 1.4 - 4.28 )	2.44 ( 10.45 )
ORAL DISORDER	GASTROINTESTINAL DISORDERS	13	1.1 ( 0.63 - 1.9 )	1.1 ( 0.11 )
INCREASED APPETITE	METABOLISM AND NUTRITION DISORDERS	13	1.21 ( 0.7 - 2.1 )	1.21 ( 0.45 )
MYCOBACTERIUM TUBERCULOSIS COMPLEX TEST POSITIVE	INVESTIGATIONS	13	1.03 ( 0.59 - 1.78 )	1.03 ( 0.01 )
LIVER FUNCTION TEST ABNORMAL	INVESTIGATIONS	13	0.24 ( 0.14 - 0.42 )	0.24 ( 30.32 )
PRODUCT DOSE OMISSION IN ERROR	INJURY, POISONING AND PROCEDURAL COMPLICATIONS	13	0.33 ( 0.19 - 0.57 )	0.33 ( 17.76 )
TENDERNESS	GENERAL DISORDERS AND ADMINISTRATION SITE CONDITIONS	13	0.48 ( 0.28 - 0.83 )	0.48 ( 7.25 )
ONYCHOMYCOSIS	INFECTIONS AND INFESTATIONS	13	0.57 ( 0.33 - 0.98 )	0.57 ( 4.25 )
FULL BLOOD COUNT DECREASED	INVESTIGATIONS	13	1.92 ( 1.1 - 3.35 )	1.92 ( 5.49 )
EYE INFLAMMATION	EYE DISORDERS	12	0.83 ( 0.47 - 1.46 )	0.83 ( 0.43 )
PHARYNGEAL SWELLING	RESPIRATORY, THORACIC AND MEDIASTINAL DISORDERS	12	1.77 ( 1 - 3.16 )	1.77 ( 3.88 )
GINGIVAL PAIN	GASTROINTESTINAL DISORDERS	12	1.12 ( 0.63 - 1.98 )	1.12 ( 0.14 )
BLOOD GLUCOSE ABNORMAL	INVESTIGATIONS	12	1.11 ( 0.63 - 1.97 )	1.11 ( 0.13 )
RASH ERYTHEMATOUS	SKIN AND SUBCUTANEOUS TISSUE DISORDERS	12	0.16 ( 0.09 - 0.29 )	0.16 ( 51.64 )
UVEITIS	EYE DISORDERS	12	0.56 ( 0.32 - 0.99 )	0.56 ( 4.09 )
PURULENCE	INFECTIONS AND INFESTATIONS	12	2.55 ( 1.42 - 4.57 )	2.55 ( 10.6 )
BODY TEMPERATURE INCREASED	INVESTIGATIONS	12	0.33 ( 0.19 - 0.58 )	0.33 ( 16.2 )
LIPOMA	NEOPLASMS BENIGN, MALIGNANT AND UNSPECIFIED (INCL CYSTS AND POLYPS)	12	1.65 ( 0.92 - 2.93 )	1.65 ( 2.91 )
INTESTINAL HAEMORRHAGE	GASTROINTESTINAL DISORDERS	12	2.14 ( 1.2 - 3.83 )	2.14 ( 6.95 )
AGITATION	PSYCHIATRIC DISORDERS	12	0.82 ( 0.46 - 1.45 )	0.82 ( 0.46 )
FEAR	PSYCHIATRIC DISORDERS	12	0.87 ( 0.49 - 1.54 )	0.87 ( 0.22 )
SLUGGISHNESS	GENERAL DISORDERS AND ADMINISTRATION SITE CONDITIONS	12	1.51 ( 0.85 - 2.69 )	1.51 ( 2.02 )
DYSGEUSIA	NERVOUS SYSTEM DISORDERS	12	0.36 ( 0.2 - 0.64 )	0.36 ( 13.42 )
POOR PERIPHERAL CIRCULATION	VASCULAR DISORDERS	12	1.68 ( 0.94 - 2.99 )	1.68 ( 3.17 )
BONE DENSITY ABNORMAL	INVESTIGATIONS	12	1.96 ( 1.1 - 3.5 )	1.96 ( 5.36 )
MUSCLE INJURY	INJURY, POISONING AND PROCEDURAL COMPLICATIONS	12	0.15 ( 0.09 - 0.27 )	0.16 ( 55.09 )
THYROID MASS	ENDOCRINE DISORDERS	12	1.31 ( 0.74 - 2.33 )	1.31 ( 0.85 )
SPINAL COLUMN INJURY	INJURY, POISONING AND PROCEDURAL COMPLICATIONS	12	1.61 ( 0.9 - 2.86 )	1.61 ( 2.64 )
JOINT INSTABILITY	MUSCULOSKELETAL AND CONNECTIVE TISSUE DISORDERS	12	1.64 ( 0.92 - 2.92 )	1.64 ( 2.87 )
SKIN ATROPHY	SKIN AND SUBCUTANEOUS TISSUE DISORDERS	12	1.14 ( 0.64 - 2.03 )	1.14 ( 0.21 )
HEPATOTOXICITY	HEPATOBILIARY DISORDERS	12	0.4 ( 0.23 - 0.71 )	0.4 ( 10.69 )
BREAKTHROUGH PAIN	GENERAL DISORDERS AND ADMINISTRATION SITE CONDITIONS	12	2.84 ( 1.58 - 5.1 )	2.84 ( 13.32 )
DIALYSIS	SURGICAL AND MEDICAL PROCEDURES	12	2.14 ( 1.2 - 3.83 )	2.14 ( 6.95 )
HYPOAESTHESIA ORAL	GASTROINTESTINAL DISORDERS	12	1.13 ( 0.63 - 2 )	1.13 ( 0.16 )
OVERDOSE	INJURY, POISONING AND PROCEDURAL COMPLICATIONS	12	0.29 ( 0.16 - 0.51 )	0.29 ( 20.88 )
RENAL CYST	RENAL AND URINARY DISORDERS	12	0.91 ( 0.51 - 1.61 )	0.91 ( 0.11 )
BONE CANCER	NEOPLASMS BENIGN, MALIGNANT AND UNSPECIFIED (INCL CYSTS AND POLYPS)	12	4.05 ( 2.24 - 7.34 )	4.05 ( 25 )
TONGUE NEOPLASM MALIGNANT STAGE UNSPECIFIED	NEOPLASMS BENIGN, MALIGNANT AND UNSPECIFIED (INCL CYSTS AND POLYPS)	12	3.95 ( 2.18 - 7.15 )	3.95 ( 24.02 )
RHEUMATOID FACTOR INCREASED	INVESTIGATIONS	12	0.91 ( 0.51 - 1.61 )	0.91 ( 0.11 )
PULMONARY CONGESTION	RESPIRATORY, THORACIC AND MEDIASTINAL DISORDERS	12	0.56 ( 0.32 - 1 )	0.56 ( 3.99 )
NEPHRITIS	RENAL AND URINARY DISORDERS	12	2.89 ( 1.61 - 5.19 )	2.89 ( 13.81 )
UPPER GASTROINTESTINAL HAEMORRHAGE	GASTROINTESTINAL DISORDERS	12	1.75 ( 0.98 - 3.13 )	1.75 ( 3.73 )
LIMB DEFORMITY	MUSCULOSKELETAL AND CONNECTIVE TISSUE DISORDERS	12	1 ( 0.56 - 1.77 )	1 ( 0 )
RENAL NEOPLASM	NEOPLASMS BENIGN, MALIGNANT AND UNSPECIFIED (INCL CYSTS AND POLYPS)	12	2.62 ( 1.46 - 4.7 )	2.62 ( 11.25 )
THERMAL BURN	INJURY, POISONING AND PROCEDURAL COMPLICATIONS	12	1 ( 0.57 - 1.78 )	1 ( 0 )
WHITE BLOOD CELL COUNT ABNORMAL	INVESTIGATIONS	12	1.21 ( 0.68 - 2.15 )	1.21 ( 0.42 )
PARKINSON'S DISEASE	NERVOUS SYSTEM DISORDERS	12	1.13 ( 0.64 - 2 )	1.13 ( 0.17 )
DERMATITIS ALLERGIC	SKIN AND SUBCUTANEOUS TISSUE DISORDERS	12	0.49 ( 0.28 - 0.87 )	0.49 ( 6.24 )
ANEURYSM	VASCULAR DISORDERS	12	1.4 ( 0.79 - 2.49 )	1.4 ( 1.31 )
ORAL MUCOSAL BLISTERING	GASTROINTESTINAL DISORDERS	12	1.27 ( 0.71 - 2.25 )	1.27 ( 0.65 )
DISEASE RISK FACTOR	SOCIAL CIRCUMSTANCES	12	18.23 ( 9.2 - 36.12 )	18.22 ( 133.65 )
BRAIN FOG	NERVOUS SYSTEM DISORDERS	12	3.16 ( 1.75 - 5.69 )	3.16 ( 16.39 )
PARANASAL SINUS HYPERSECRETION	RESPIRATORY, THORACIC AND MEDIASTINAL DISORDERS	11	0.54 ( 0.3 - 0.98 )	0.54 ( 4.23 )
CHOLECYSTITIS	HEPATOBILIARY DISORDERS	11	0.84 ( 0.46 - 1.52 )	0.84 ( 0.34 )
BENIGN NEOPLASM	NEOPLASMS BENIGN, MALIGNANT AND UNSPECIFIED (INCL CYSTS AND POLYPS)	11	2.66 ( 1.45 - 4.91 )	2.66 ( 10.72 )
THYROID CANCER	NEOPLASMS BENIGN, MALIGNANT AND UNSPECIFIED (INCL CYSTS AND POLYPS)	11	1 ( 0.55 - 1.82 )	1 ( 0 )
MUSCLE DISORDER	MUSCULOSKELETAL AND CONNECTIVE TISSUE DISORDERS	11	1.5 ( 0.82 - 2.74 )	1.5 ( 1.78 )
SPINAL LAMINECTOMY	SURGICAL AND MEDICAL PROCEDURES	11	4.14 ( 2.22 - 7.7 )	4.14 ( 23.68 )
RASH VESICULAR	SKIN AND SUBCUTANEOUS TISSUE DISORDERS	11	1.22 ( 0.67 - 2.22 )	1.22 ( 0.42 )
ABDOMINAL OPERATION	SURGICAL AND MEDICAL PROCEDURES	11	5.64 ( 3 - 10.61 )	5.64 ( 36.75 )
BRADYCARDIA	CARDIAC DISORDERS	11	0.92 ( 0.5 - 1.67 )	0.92 ( 0.08 )
INVASIVE DUCTAL BREAST CARCINOMA	NEOPLASMS BENIGN, MALIGNANT AND UNSPECIFIED (INCL CYSTS AND POLYPS)	11	1.8 ( 0.98 - 3.3 )	1.8 ( 3.76 )
RADICULOPATHY	NERVOUS SYSTEM DISORDERS	11	2.09 ( 1.14 - 3.83 )	2.09 ( 5.92 )
PARANASAL SINUS DISCOMFORT	RESPIRATORY, THORACIC AND MEDIASTINAL DISORDERS	11	1.34 ( 0.73 - 2.44 )	1.34 ( 0.92 )
CARDIAC VALVE DISEASE	CARDIAC DISORDERS	11	1.4 ( 0.77 - 2.56 )	1.4 ( 1.22 )
ADVERSE FOOD REACTION	GENERAL DISORDERS AND ADMINISTRATION SITE CONDITIONS	11	6.03 ( 3.2 - 11.38 )	6.03 ( 40.06 )
EYE IRRITATION	EYE DISORDERS	11	0.51 ( 0.28 - 0.92 )	0.51 ( 5.12 )
RENAL FUNCTION TEST ABNORMAL	INVESTIGATIONS	11	1.56 ( 0.85 - 2.84 )	1.56 ( 2.11 )
HYPERTENSIVE CRISIS	VASCULAR DISORDERS	11	0.85 ( 0.47 - 1.55 )	0.85 ( 0.27 )
EYE DISCHARGE	EYE DISORDERS	11	1.2 ( 0.66 - 2.18 )	1.2 ( 0.34 )
ADVERSE EVENT	GENERAL DISORDERS AND ADMINISTRATION SITE CONDITIONS	11	0.1 ( 0.06 - 0.18 )	0.1 ( 89.29 )
WOUND SECRETION	INJURY, POISONING AND PROCEDURAL COMPLICATIONS	11	1.3 ( 0.71 - 2.37 )	1.3 ( 0.74 )
MUSCLE FATIGUE	MUSCULOSKELETAL AND CONNECTIVE TISSUE DISORDERS	11	2.16 ( 1.18 - 3.96 )	2.16 ( 6.5 )
INVESTIGATION ABNORMAL	INVESTIGATIONS	11	1.99 ( 1.09 - 3.65 )	1.99 ( 5.18 )
DISEASE COMPLICATION	GENERAL DISORDERS AND ADMINISTRATION SITE CONDITIONS	11	5.23 ( 2.79 - 9.82 )	5.23 ( 33.26 )
PANCYTOPENIA	BLOOD AND LYMPHATIC SYSTEM DISORDERS	11	0.14 ( 0.08 - 0.26 )	0.14 ( 56.31 )
MENOPAUSE	SOCIAL CIRCUMSTANCES	11	2.13 ( 1.16 - 3.91 )	2.13 ( 6.25 )
IRON DEFICIENCY ANAEMIA	BLOOD AND LYMPHATIC SYSTEM DISORDERS	11	0.88 ( 0.49 - 1.61 )	0.88 ( 0.16 )
EYE PRURITUS	EYE DISORDERS	11	0.51 ( 0.28 - 0.92 )	0.51 ( 5.25 )
RESTLESS LEGS SYNDROME	NERVOUS SYSTEM DISORDERS	11	0.82 ( 0.45 - 1.49 )	0.82 ( 0.43 )
LARGE INTESTINE INFECTION	INFECTIONS AND INFESTATIONS	11	6.12 ( 3.24 - 11.55 )	6.12 ( 40.77 )
INJECTION SITE PAIN	GENERAL DISORDERS AND ADMINISTRATION SITE CONDITIONS	11	0.01 ( 0 - 0.02 )	0.01 ( 1220.98 )
OESOPHAGITIS	GASTROINTESTINAL DISORDERS	11	1.34 ( 0.73 - 2.44 )	1.34 ( 0.92 )
EMOTIONAL DISORDER	PSYCHIATRIC DISORDERS	11	0.66 ( 0.36 - 1.19 )	0.66 ( 1.97 )
FRACTURED COCCYX	INJURY, POISONING AND PROCEDURAL COMPLICATIONS	11	3.91 ( 2.11 - 7.27 )	3.91 ( 21.7 )
EYELID PTOSIS	EYE DISORDERS	11	1.87 ( 1.02 - 3.43 )	1.87 ( 4.27 )
BONE CONTUSION	INJURY, POISONING AND PROCEDURAL COMPLICATIONS	10	5.64 ( 2.91 - 10.94 )	5.64 ( 33.41 )
VASCULITIS	VASCULAR DISORDERS	10	0.38 ( 0.2 - 0.71 )	0.38 ( 10 )
SCLERITIS	EYE DISORDERS	10	1.06 ( 0.57 - 1.99 )	1.06 ( 0.04 )
CARDIOMYOPATHY	CARDIAC DISORDERS	10	0.9 ( 0.48 - 1.68 )	0.9 ( 0.11 )
RENAL INJURY	RENAL AND URINARY DISORDERS	10	3.11 ( 1.63 - 5.92 )	3.11 ( 13.26 )
CEREBRAL DISORDER	NERVOUS SYSTEM DISORDERS	10	1.53 ( 0.81 - 2.88 )	1.53 ( 1.77 )
BREATH SOUNDS ABNORMAL	INVESTIGATIONS	10	1.65 ( 0.87 - 3.1 )	1.65 ( 2.43 )
CHRONIC SINUSITIS	INFECTIONS AND INFESTATIONS	10	1.06 ( 0.56 - 1.98 )	1.06 ( 0.03 )
VENTRICULAR TACHYCARDIA	CARDIAC DISORDERS	10	2.24 ( 1.19 - 4.24 )	2.24 ( 6.52 )
LATENT TUBERCULOSIS	INFECTIONS AND INFESTATIONS	10	1.09 ( 0.58 - 2.04 )	1.09 ( 0.07 )
COMPRESSION FRACTURE	INJURY, POISONING AND PROCEDURAL COMPLICATIONS	10	1.65 ( 0.87 - 3.1 )	1.65 ( 2.43 )
HERPES SIMPLEX	INFECTIONS AND INFESTATIONS	10	1.02 ( 0.55 - 1.92 )	1.02 ( 0 )
BACTERIAL TEST POSITIVE	INVESTIGATIONS	10	3.56 ( 1.86 - 6.79 )	3.56 ( 16.86 )
ANAL INCONTINENCE	GASTROINTESTINAL DISORDERS	10	2.65 ( 1.4 - 5.03 )	2.65 ( 9.63 )
MAMMOPLASTY	SURGICAL AND MEDICAL PROCEDURES	10	4.54 ( 2.36 - 8.73 )	4.54 ( 24.74 )
HYPERAESTHESIA	NERVOUS SYSTEM DISORDERS	10	0.88 ( 0.47 - 1.65 )	0.88 ( 0.16 )
BONE GRAFT	SURGICAL AND MEDICAL PROCEDURES	10	2.8 ( 1.47 - 5.32 )	2.8 ( 10.81 )
TEMPERATURE INTOLERANCE	GENERAL DISORDERS AND ADMINISTRATION SITE CONDITIONS	10	1.57 ( 0.84 - 2.96 )	1.57 ( 2.01 )
GLYCOSYLATED HAEMOGLOBIN INCREASED	INVESTIGATIONS	10	1.36 ( 0.72 - 2.56 )	1.36 ( 0.93 )
BLOOD CALCIUM DECREASED	INVESTIGATIONS	10	1.86 ( 0.99 - 3.51 )	1.86 ( 3.81 )
PELVIC PAIN	REPRODUCTIVE SYSTEM AND BREAST DISORDERS	10	1.23 ( 0.65 - 2.3 )	1.23 ( 0.4 )
THIRST	GENERAL DISORDERS AND ADMINISTRATION SITE CONDITIONS	10	1.11 ( 0.59 - 2.08 )	1.11 ( 0.1 )
IMPLANTABLE DEFIBRILLATOR INSERTION	SURGICAL AND MEDICAL PROCEDURES	10	8.77 ( 4.42 - 17.41 )	8.77 ( 56.36 )
HYPOKALAEMIA	METABOLISM AND NUTRITION DISORDERS	10	0.52 ( 0.28 - 0.97 )	0.52 ( 4.35 )
ANKYLOSING SPONDYLITIS	MUSCULOSKELETAL AND CONNECTIVE TISSUE DISORDERS	10	0.69 ( 0.37 - 1.29 )	0.69 ( 1.38 )
POST PROCEDURAL HAEMORRHAGE	INJURY, POISONING AND PROCEDURAL COMPLICATIONS	10	1.13 ( 0.6 - 2.12 )	1.13 ( 0.14 )
THERAPEUTIC PROCEDURE	SURGICAL AND MEDICAL PROCEDURES	10	5.64 ( 2.91 - 10.94 )	5.64 ( 33.41 )
CORONARY ARTERY BYPASS	SURGICAL AND MEDICAL PROCEDURES	10	1.8 ( 0.96 - 3.4 )	1.8 ( 3.42 )
BURSITIS INFECTIVE	INFECTIONS AND INFESTATIONS	10	2.27 ( 1.2 - 4.29 )	2.27 ( 6.71 )
GASTRIC OPERATION	SURGICAL AND MEDICAL PROCEDURES	10	5.48 ( 2.83 - 10.63 )	5.48 ( 32.19 )
PLEURITIC PAIN	RESPIRATORY, THORACIC AND MEDIASTINAL DISORDERS	10	1.56 ( 0.83 - 2.94 )	1.56 ( 1.94 )
SITTING DISABILITY	SOCIAL CIRCUMSTANCES	10	9.18 ( 4.61 - 18.27 )	9.18 ( 59.15 )
RETINAL TEAR	EYE DISORDERS	10	2.53 ( 1.34 - 4.8 )	2.53 ( 8.7 )
DIFFUSE LARGE B-CELL LYMPHOMA	NEOPLASMS BENIGN, MALIGNANT AND UNSPECIFIED (INCL CYSTS AND POLYPS)	10	0.49 ( 0.26 - 0.92 )	0.49 ( 5.13 )
RHINITIS	INFECTIONS AND INFESTATIONS	10	0.58 ( 0.31 - 1.08 )	0.58 ( 3.04 )
INFUSION	SURGICAL AND MEDICAL PROCEDURES	10	11.28 ( 5.59 - 22.78 )	11.28 ( 72.88 )
ELECTRIC SHOCK SENSATION	NERVOUS SYSTEM DISORDERS	10	13.16 ( 6.43 - 26.93 )	13.16 ( 84.28 )
THYROID OPERATION	SURGICAL AND MEDICAL PROCEDURES	10	7.05 ( 3.6 - 13.82 )	7.05 ( 44.06 )
SCIATIC NERVE NEUROPATHY	NERVOUS SYSTEM DISORDERS	10	3.01 ( 1.58 - 5.73 )	3.01 ( 12.5 )
LIMB RECONSTRUCTIVE SURGERY	SURGICAL AND MEDICAL PROCEDURES	10	16.45 ( 7.87 - 34.41 )	16.45 ( 102.44 )
VACCINATION COMPLICATION	INJURY, POISONING AND PROCEDURAL COMPLICATIONS	10	3.8 ( 1.98 - 7.27 )	3.8 ( 18.79 )
NERVE BLOCK	SURGICAL AND MEDICAL PROCEDURES	10	3.69 ( 1.93 - 7.06 )	3.69 ( 17.93 )
TOE AMPUTATION	SURGICAL AND MEDICAL PROCEDURES	10	1.6 ( 0.85 - 3.01 )	1.6 ( 2.15 )
STREPTOCOCCAL INFECTION	INFECTIONS AND INFESTATIONS	10	0.98 ( 0.52 - 1.83 )	0.98 ( 0 )
MIDDLE EAR EFFUSION	EAR AND LABYRINTH DISORDERS	10	1.72 ( 0.92 - 3.25 )	1.72 ( 2.91 )
CEREBRAL THROMBOSIS	NERVOUS SYSTEM DISORDERS	10	2.92 ( 1.54 - 5.56 )	2.92 ( 11.79 )
INCISION SITE IMPAIRED HEALING	INJURY, POISONING AND PROCEDURAL COMPLICATIONS	10	8.4 ( 4.25 - 16.63 )	8.4 ( 53.76 )
UTERINE CANCER	NEOPLASMS BENIGN, MALIGNANT AND UNSPECIFIED (INCL CYSTS AND POLYPS)	10	1.14 ( 0.61 - 2.13 )	1.14 ( 0.16 )
POST-ACUTE COVID-19 SYNDROME	INFECTIONS AND INFESTATIONS	10	4.76 ( 2.47 - 9.17 )	4.76 ( 26.48 )
RETINAL VEIN OCCLUSION	EYE DISORDERS	10	4.87 ( 2.53 - 9.4 )	4.87 ( 27.41 )
GLUCOSE TOLERANCE IMPAIRED	METABOLISM AND NUTRITION DISORDERS	10	1.57 ( 0.83 - 2.95 )	1.57 ( 1.97 )
ATRIOVENTRICULAR BLOCK	CARDIAC DISORDERS	10	2.26 ( 1.19 - 4.27 )	2.26 ( 6.62 )
TONSILLITIS	INFECTIONS AND INFESTATIONS	10	0.75 ( 0.4 - 1.41 )	0.75 ( 0.78 )
PERONEAL NERVE PALSY	NERVOUS SYSTEM DISORDERS	10	2.13 ( 1.13 - 4.03 )	2.13 ( 5.72 )
DERMATITIS CONTACT	SKIN AND SUBCUTANEOUS TISSUE DISORDERS	10	0.9 ( 0.48 - 1.69 )	0.9 ( 0.1 )
ERYSIPELAS	INFECTIONS AND INFESTATIONS	9	0.61 ( 0.32 - 1.18 )	0.61 ( 2.17 )
MULTIPLE ORGAN DYSFUNCTION SYNDROME	GENERAL DISORDERS AND ADMINISTRATION SITE CONDITIONS	9	0.63 ( 0.33 - 1.23 )	0.63 ( 1.86 )
EAR DISORDER	EAR AND LABYRINTH DISORDERS	9	1.04 ( 0.54 - 2.01 )	1.04 ( 0.01 )
PAINFUL RESPIRATION	RESPIRATORY, THORACIC AND MEDIASTINAL DISORDERS	9	1.58 ( 0.81 - 3.08 )	1.58 ( 1.84 )
TRAUMATIC LUNG INJURY	INJURY, POISONING AND PROCEDURAL COMPLICATIONS	9	2.58 ( 1.31 - 5.05 )	2.57 ( 8.14 )
ACUTE RESPIRATORY DISTRESS SYNDROME	RESPIRATORY, THORACIC AND MEDIASTINAL DISORDERS	9	0.55 ( 0.28 - 1.06 )	0.55 ( 3.27 )
MELAENA	GASTROINTESTINAL DISORDERS	9	0.85 ( 0.44 - 1.65 )	0.85 ( 0.22 )
OXYGEN THERAPY	SURGICAL AND MEDICAL PROCEDURES	9	10.45 ( 5.01 - 21.79 )	10.45 ( 60.82 )
ATYPICAL PNEUMONIA	INFECTIONS AND INFESTATIONS	9	1.45 ( 0.75 - 2.82 )	1.45 ( 1.21 )
BLOOD THYROID STIMULATING HORMONE INCREASED	INVESTIGATIONS	9	3.23 ( 1.64 - 6.37 )	3.23 ( 12.81 )
ELECTROCARDIOGRAM ABNORMAL	INVESTIGATIONS	9	1.78 ( 0.91 - 3.47 )	1.78 ( 2.92 )
FRACTURED SACRUM	INJURY, POISONING AND PROCEDURAL COMPLICATIONS	9	3.04 ( 1.54 - 5.98 )	3.04 ( 11.42 )
FLUSHING	VASCULAR DISORDERS	9	0.2 ( 0.1 - 0.39 )	0.2 ( 28.31 )
FLANK PAIN	MUSCULOSKELETAL AND CONNECTIVE TISSUE DISORDERS	9	0.97 ( 0.5 - 1.87 )	0.97 ( 0.01 )
CARDIAC MURMUR	INVESTIGATIONS	9	0.9 ( 0.47 - 1.75 )	0.9 ( 0.09 )
GASTRIC ULCER HAEMORRHAGE	GASTROINTESTINAL DISORDERS	9	1.5 ( 0.77 - 2.92 )	1.5 ( 1.44 )
PATHOLOGICAL FRACTURE	MUSCULOSKELETAL AND CONNECTIVE TISSUE DISORDERS	9	1.95 ( 1 - 3.81 )	1.95 ( 3.98 )
FOOD ALLERGY	IMMUNE SYSTEM DISORDERS	9	0.53 ( 0.28 - 1.03 )	0.53 ( 3.66 )
CHEST INJURY	INJURY, POISONING AND PROCEDURAL COMPLICATIONS	9	2.08 ( 1.06 - 4.06 )	2.08 ( 4.78 )
BLOOD UREA INCREASED	INVESTIGATIONS	9	1.12 ( 0.58 - 2.18 )	1.12 ( 0.12 )
DERMATITIS ATOPIC	SKIN AND SUBCUTANEOUS TISSUE DISORDERS	9	5.3 ( 2.64 - 10.64 )	5.3 ( 27.71 )
DEVICE ISSUE	PRODUCT ISSUES	9	0.05 ( 0.02 - 0.09 )	0.05 ( 175.07 )
VAGINAL HAEMORRHAGE	REPRODUCTIVE SYSTEM AND BREAST DISORDERS	9	0.48 ( 0.25 - 0.92 )	0.48 ( 5.08 )
HYPERKERATOSIS	SKIN AND SUBCUTANEOUS TISSUE DISORDERS	9	0.57 ( 0.3 - 1.11 )	0.57 ( 2.82 )
PRECANCEROUS SKIN LESION	SKIN AND SUBCUTANEOUS TISSUE DISORDERS	9	1.59 ( 0.82 - 3.1 )	1.59 ( 1.91 )
DIVERTICULITIS INTESTINAL PERFORATED	INFECTIONS AND INFESTATIONS	9	12.25 ( 5.8 - 25.89 )	12.25 ( 70.99 )
ARTERIOSCLEROSIS CORONARY ARTERY	CARDIAC DISORDERS	9	1.21 ( 0.62 - 2.35 )	1.21 ( 0.33 )
RED CELL DISTRIBUTION WIDTH INCREASED	INVESTIGATIONS	9	1.74 ( 0.89 - 3.4 )	1.74 ( 2.72 )
RESPIRATORY DISTRESS	RESPIRATORY, THORACIC AND MEDIASTINAL DISORDERS	9	0.65 ( 0.34 - 1.25 )	0.65 ( 1.69 )
IMPAIRED GASTRIC EMPTYING	GASTROINTESTINAL DISORDERS	9	1 ( 0.52 - 1.94 )	1 ( 0 )
NECK MASS	MUSCULOSKELETAL AND CONNECTIVE TISSUE DISORDERS	9	1.02 ( 0.53 - 1.98 )	1.02 ( 0 )
PHARYNGEAL OPERATION	SURGICAL AND MEDICAL PROCEDURES	9	18.7 ( 8.46 - 41.34 )	18.7 ( 102.33 )
CORNEAL DISORDER	EYE DISORDERS	9	3.35 ( 1.7 - 6.62 )	3.35 ( 13.69 )
PERIPHERAL ARTERY OCCLUSION	VASCULAR DISORDERS	9	2.78 ( 1.41 - 5.46 )	2.78 ( 9.56 )
HEPATOMEGALY	HEPATOBILIARY DISORDERS	9	1.02 ( 0.52 - 1.97 )	1.02 ( 0 )
RHABDOMYOLYSIS	MUSCULOSKELETAL AND CONNECTIVE TISSUE DISORDERS	9	1.8 ( 0.92 - 3.52 )	1.8 ( 3.08 )
TENOPLASTY	SURGICAL AND MEDICAL PROCEDURES	9	6.23 ( 3.09 - 12.59 )	6.23 ( 34.16 )
VEIN DISORDER	VASCULAR DISORDERS	9	0.96 ( 0.5 - 1.86 )	0.96 ( 0.01 )
THROMBOPHLEBITIS	VASCULAR DISORDERS	9	1.83 ( 0.94 - 3.57 )	1.83 ( 3.25 )
PERIARTHRITIS	MUSCULOSKELETAL AND CONNECTIVE TISSUE DISORDERS	9	1.87 ( 0.96 - 3.65 )	1.87 ( 3.48 )
HEPATIC ENZYME ABNORMAL	INVESTIGATIONS	9	0.71 ( 0.37 - 1.38 )	0.71 ( 1.03 )
CAROTID ARTERY STENOSIS	NERVOUS SYSTEM DISORDERS	9	2.19 ( 1.12 - 4.29 )	2.19 ( 5.54 )
CHOLECYSTITIS ACUTE	HEPATOBILIARY DISORDERS	9	1.94 ( 0.99 - 3.79 )	1.94 ( 3.92 )
DENTAL RESTORATION FAILURE	INJURY, POISONING AND PROCEDURAL COMPLICATIONS	9	3.63 ( 1.83 - 7.18 )	3.63 ( 15.68 )
INITIAL INSOMNIA	PSYCHIATRIC DISORDERS	9	2.24 ( 1.14 - 4.37 )	2.23 ( 5.81 )
LYMPHOPENIA	BLOOD AND LYMPHATIC SYSTEM DISORDERS	9	1.1 ( 0.57 - 2.13 )	1.1 ( 0.07 )
SPINAL CORD INJURY	INJURY, POISONING AND PROCEDURAL COMPLICATIONS	9	4.44 ( 2.23 - 8.85 )	4.44 ( 21.58 )
EXPIRED PRODUCT ADMINISTERED	INJURY, POISONING AND PROCEDURAL COMPLICATIONS	9	1.26 ( 0.65 - 2.46 )	1.26 ( 0.48 )
JOINT FLUID DRAINAGE	SURGICAL AND MEDICAL PROCEDURES	9	2.91 ( 1.48 - 5.73 )	2.91 ( 10.53 )
GLOSSODYNIA	GASTROINTESTINAL DISORDERS	9	0.05 ( 0.03 - 0.09 )	0.05 ( 167.16 )
MYOSITIS	MUSCULOSKELETAL AND CONNECTIVE TISSUE DISORDERS	9	1.1 ( 0.57 - 2.14 )	1.1 ( 0.09 )
METASTASES TO LIVER	NEOPLASMS BENIGN, MALIGNANT AND UNSPECIFIED (INCL CYSTS AND POLYPS)	9	0.77 ( 0.4 - 1.49 )	0.77 ( 0.6 )
HEPATIC PAIN	HEPATOBILIARY DISORDERS	9	2.5 ( 1.28 - 4.91 )	2.5 ( 7.64 )
LUNG ADENOCARCINOMA	NEOPLASMS BENIGN, MALIGNANT AND UNSPECIFIED (INCL CYSTS AND POLYPS)	9	0.9 ( 0.46 - 1.74 )	0.9 ( 0.1 )
THINKING ABNORMAL	PSYCHIATRIC DISORDERS	9	1.25 ( 0.64 - 2.42 )	1.25 ( 0.43 )
JOINT SURGERY	SURGICAL AND MEDICAL PROCEDURES	9	2.52 ( 1.28 - 4.94 )	2.52 ( 7.76 )
NONSPECIFIC REACTION	GENERAL DISORDERS AND ADMINISTRATION SITE CONDITIONS	9	2.34 ( 1.19 - 4.58 )	2.34 ( 6.51 )
INFECTIOUS PLEURAL EFFUSION	INFECTIONS AND INFESTATIONS	8	1.88 ( 0.93 - 3.82 )	1.88 ( 3.15 )
GENITAL HERPES	INFECTIONS AND INFESTATIONS	8	2.38 ( 1.16 - 4.85 )	2.37 ( 6.01 )
HEMIPARESIS	NERVOUS SYSTEM DISORDERS	8	0.66 ( 0.33 - 1.33 )	0.66 ( 1.34 )
HYPERCHOLESTEROLAEMIA	METABOLISM AND NUTRITION DISORDERS	8	0.27 ( 0.13 - 0.53 )	0.27 ( 16.04 )
FOOD INTOLERANCE	METABOLISM AND NUTRITION DISORDERS	8	1.46 ( 0.72 - 2.96 )	1.46 ( 1.13 )
BLOOD POTASSIUM INCREASED	INVESTIGATIONS	8	0.94 ( 0.46 - 1.89 )	0.94 ( 0.03 )
BILE DUCT STONE	HEPATOBILIARY DISORDERS	8	1.68 ( 0.83 - 3.41 )	1.68 ( 2.11 )
UNRESPONSIVE TO STIMULI	NERVOUS SYSTEM DISORDERS	8	1.79 ( 0.88 - 3.65 )	1.79 ( 2.69 )
VOLVULUS	GASTROINTESTINAL DISORDERS	8	2.82 ( 1.38 - 5.78 )	2.82 ( 8.77 )
WOUND COMPLICATION	INJURY, POISONING AND PROCEDURAL COMPLICATIONS	8	1.03 ( 0.51 - 2.08 )	1.03 ( 0.01 )
ADVERSE REACTION	GENERAL DISORDERS AND ADMINISTRATION SITE CONDITIONS	8	0.29 ( 0.14 - 0.58 )	0.29 ( 14.06 )
POSTOPERATIVE WOUND COMPLICATION	INJURY, POISONING AND PROCEDURAL COMPLICATIONS	8	1.89 ( 0.93 - 3.84 )	1.89 ( 3.21 )
PROTEIN URINE PRESENT	INVESTIGATIONS	8	2.06 ( 1.01 - 4.2 )	2.06 ( 4.17 )
VENOUS OCCLUSION	VASCULAR DISORDERS	8	1.7 ( 0.84 - 3.45 )	1.7 ( 2.2 )
LIMB ASYMMETRY	MUSCULOSKELETAL AND CONNECTIVE TISSUE DISORDERS	8	4 ( 1.93 - 8.27 )	4 ( 16.33 )
MEDICATION ERROR	INJURY, POISONING AND PROCEDURAL COMPLICATIONS	8	0.22 ( 0.11 - 0.43 )	0.22 ( 22.59 )
MACULAR HOLE	EYE DISORDERS	8	3.16 ( 1.54 - 6.49 )	3.16 ( 10.93 )
RADIUS FRACTURE	INJURY, POISONING AND PROCEDURAL COMPLICATIONS	8	1.66 ( 0.82 - 3.37 )	1.66 ( 2.03 )
INFECTED BITE	INFECTIONS AND INFESTATIONS	8	1.79 ( 0.88 - 3.65 )	1.79 ( 2.69 )
ENDOMETRIOSIS	REPRODUCTIVE SYSTEM AND BREAST DISORDERS	8	1.31 ( 0.65 - 2.64 )	1.31 ( 0.55 )
MYOCARDITIS	CARDIAC DISORDERS	8	2.01 ( 0.99 - 4.09 )	2.01 ( 3.87 )
HEMIPLEGIA	NERVOUS SYSTEM DISORDERS	8	1.09 ( 0.54 - 2.21 )	1.09 ( 0.06 )
NEPHRECTOMY	SURGICAL AND MEDICAL PROCEDURES	8	6.19 ( 2.94 - 13.05 )	6.19 ( 30.12 )
RENAL MASS	RENAL AND URINARY DISORDERS	8	2.59 ( 1.27 - 5.29 )	2.59 ( 7.32 )
MOOD ALTERED	PSYCHIATRIC DISORDERS	8	0.72 ( 0.36 - 1.45 )	0.72 ( 0.84 )
RED BLOOD CELL COUNT INCREASED	INVESTIGATIONS	8	2.39 ( 1.17 - 4.89 )	2.39 ( 6.12 )
BRAIN OPERATION	SURGICAL AND MEDICAL PROCEDURES	8	5.45 ( 2.6 - 11.41 )	5.45 ( 25.52 )
BLOOD PRESSURE MEASUREMENT	INVESTIGATIONS	8	9.03 ( 4.19 - 19.46 )	9.02 ( 46.46 )
POSTOPERATIVE THROMBOSIS	INJURY, POISONING AND PROCEDURAL COMPLICATIONS	8	4.16 ( 2.01 - 8.61 )	4.16 ( 17.35 )
DYSKINESIA	NERVOUS SYSTEM DISORDERS	8	0.79 ( 0.39 - 1.6 )	0.79 ( 0.42 )
THYROIDECTOMY	SURGICAL AND MEDICAL PROCEDURES	8	2.8 ( 1.36 - 5.73 )	2.8 ( 8.61 )
FRACTURE PAIN	MUSCULOSKELETAL AND CONNECTIVE TISSUE DISORDERS	8	5.26 ( 2.52 - 11.01 )	5.26 ( 24.38 )
MALABSORPTION	GASTROINTESTINAL DISORDERS	8	3.1 ( 1.51 - 6.36 )	3.1 ( 10.53 )
MONOPLEGIA	NERVOUS SYSTEM DISORDERS	8	2 ( 0.98 - 4.07 )	2 ( 3.8 )
DIVERTICULAR PERFORATION	GASTROINTESTINAL DISORDERS	8	0.96 ( 0.47 - 1.93 )	0.96 ( 0.01 )
ISCHAEMIA	VASCULAR DISORDERS	8	2.77 ( 1.35 - 5.68 )	2.77 ( 8.46 )
WOUND DEHISCENCE	INJURY, POISONING AND PROCEDURAL COMPLICATIONS	8	1.05 ( 0.52 - 2.11 )	1.05 ( 0.02 )
NAIL OPERATION	SURGICAL AND MEDICAL PROCEDURES	8	2.82 ( 1.38 - 5.78 )	2.82 ( 8.77 )
THERAPEUTIC NERVE ABLATION	SURGICAL AND MEDICAL PROCEDURES	8	16.63 ( 7.28 - 37.98 )	16.62 ( 82.67 )
CYTOMEGALOVIRUS INFECTION	INFECTIONS AND INFESTATIONS	8	1.02 ( 0.51 - 2.06 )	1.02 ( 0 )
GAMMA-GLUTAMYLTRANSFERASE INCREASED	INVESTIGATIONS	8	0.51 ( 0.25 - 1.02 )	0.51 ( 3.82 )
SUBARACHNOID HAEMORRHAGE	NERVOUS SYSTEM DISORDERS	8	1.14 ( 0.56 - 2.3 )	1.14 ( 0.13 )
OSTEOPOROTIC FRACTURE	MUSCULOSKELETAL AND CONNECTIVE TISSUE DISORDERS	8	1.16 ( 0.57 - 2.34 )	1.16 ( 0.17 )
MUSCLE OPERATION	SURGICAL AND MEDICAL PROCEDURES	8	35.1 ( 13.54 - 90.98 )	35.1 ( 140.29 )
MOUTH HAEMORRHAGE	GASTROINTESTINAL DISORDERS	8	1.17 ( 0.58 - 2.35 )	1.17 ( 0.18 )
MOUTH SWELLING	GASTROINTESTINAL DISORDERS	8	1.24 ( 0.61 - 2.5 )	1.24 ( 0.36 )
OROPHARYNGEAL DISCOMFORT	RESPIRATORY, THORACIC AND MEDIASTINAL DISORDERS	8	1.05 ( 0.52 - 2.11 )	1.05 ( 0.02 )
HYPERKALAEMIA	METABOLISM AND NUTRITION DISORDERS	8	1.43 ( 0.71 - 2.89 )	1.43 ( 1 )
HEPATIC FAILURE	HEPATOBILIARY DISORDERS	8	0.52 ( 0.26 - 1.04 )	0.52 ( 3.53 )
PAROSMIA	NERVOUS SYSTEM DISORDERS	8	1.81 ( 0.89 - 3.67 )	1.8 ( 2.75 )
FRUSTRATION TOLERANCE DECREASED	PSYCHIATRIC DISORDERS	8	0.77 ( 0.38 - 1.55 )	0.77 ( 0.53 )
IRRITABILITY	PSYCHIATRIC DISORDERS	8	0.45 ( 0.22 - 0.9 )	0.45 ( 5.38 )
GASTROINTESTINAL INFLAMMATION	GASTROINTESTINAL DISORDERS	8	1.05 ( 0.52 - 2.11 )	1.05 ( 0.02 )
WEIGHT ABNORMAL	INVESTIGATIONS	8	2.49 ( 1.22 - 5.08 )	2.49 ( 6.69 )
ATELECTASIS	RESPIRATORY, THORACIC AND MEDIASTINAL DISORDERS	8	0.81 ( 0.4 - 1.62 )	0.81 ( 0.37 )
ATRIAL FLUTTER	CARDIAC DISORDERS	8	1.56 ( 0.77 - 3.15 )	1.56 ( 1.53 )
HEPATIC MASS	HEPATOBILIARY DISORDERS	8	3.16 ( 1.54 - 6.49 )	3.16 ( 10.93 )
POST PROCEDURAL SEPSIS	INFECTIONS AND INFESTATIONS	8	5.45 ( 2.6 - 11.41 )	5.45 ( 25.52 )
DIVERTICULUM INTESTINAL	GASTROINTESTINAL DISORDERS	8	1.22 ( 0.6 - 2.46 )	1.22 ( 0.31 )
SPONDYLOLISTHESIS	MUSCULOSKELETAL AND CONNECTIVE TISSUE DISORDERS	8	1.4 ( 0.69 - 2.83 )	1.4 ( 0.87 )
SENSORY DISTURBANCE	NERVOUS SYSTEM DISORDERS	8	0.65 ( 0.32 - 1.3 )	0.65 ( 1.53 )
VENOUS THROMBOSIS LIMB	VASCULAR DISORDERS	8	2.31 ( 1.13 - 4.7 )	2.31 ( 5.59 )
ASTHMATIC CRISIS	RESPIRATORY, THORACIC AND MEDIASTINAL DISORDERS	8	3.81 ( 1.84 - 7.86 )	3.81 ( 15.09 )
PNEUMONIA FUNGAL	INFECTIONS AND INFESTATIONS	8	2.7 ( 1.32 - 5.53 )	2.7 ( 8.01 )
CRANIOFACIAL FRACTURE	INJURY, POISONING AND PROCEDURAL COMPLICATIONS	8	26.32 ( 10.76 - 64.4 )	26.32 ( 116.93 )
RECTAL CANCER	NEOPLASMS BENIGN, MALIGNANT AND UNSPECIFIED (INCL CYSTS AND POLYPS)	8	1.26 ( 0.62 - 2.55 )	1.26 ( 0.43 )
MUSCLE TWITCHING	MUSCULOSKELETAL AND CONNECTIVE TISSUE DISORDERS	8	0.77 ( 0.38 - 1.54 )	0.77 ( 0.56 )
LIVER ABSCESS	INFECTIONS AND INFESTATIONS	8	2.15 ( 1.05 - 4.38 )	2.15 ( 4.66 )
INCISION SITE DISCHARGE	INJURY, POISONING AND PROCEDURAL COMPLICATIONS	8	24.3 ( 10.07 - 58.63 )	24.3 ( 110.63 )
SCAPULA FRACTURE	INJURY, POISONING AND PROCEDURAL COMPLICATIONS	8	9.29 ( 4.3 - 20.07 )	9.29 ( 47.91 )
COAGULOPATHY	BLOOD AND LYMPHATIC SYSTEM DISORDERS	8	0.87 ( 0.43 - 1.75 )	0.87 ( 0.16 )
ENCEPHALITIS	INFECTIONS AND INFESTATIONS	8	0.83 ( 0.41 - 1.68 )	0.83 ( 0.26 )
HYPERTRANSAMINASAEMIA	HEPATOBILIARY DISORDERS	8	2.61 ( 1.28 - 5.34 )	2.61 ( 7.46 )
LYME DISEASE	INFECTIONS AND INFESTATIONS	8	0.91 ( 0.45 - 1.83 )	0.91 ( 0.07 )
THERAPEUTIC PRODUCT EFFECT VARIABLE	GENERAL DISORDERS AND ADMINISTRATION SITE CONDITIONS	8	4.39 ( 2.11 - 9.11 )	4.39 ( 18.83 )
UPPER RESPIRATORY TRACT CONGESTION	RESPIRATORY, THORACIC AND MEDIASTINAL DISORDERS	8	0.82 ( 0.41 - 1.64 )	0.82 ( 0.32 )
TRISMUS	MUSCULOSKELETAL AND CONNECTIVE TISSUE DISORDERS	7	2.05 ( 0.96 - 4.38 )	2.05 ( 3.57 )
TREATMENT FAILURE	GENERAL DISORDERS AND ADMINISTRATION SITE CONDITIONS	7	0.02 ( 0.01 - 0.05 )	0.02 ( 306.05 )
TONGUE ULCERATION	GASTROINTESTINAL DISORDERS	7	1.03 ( 0.49 - 2.18 )	1.03 ( 0.01 )
ACROCHORDON	NEOPLASMS BENIGN, MALIGNANT AND UNSPECIFIED (INCL CYSTS AND POLYPS)	7	4.13 ( 1.89 - 8.99 )	4.13 ( 15.01 )
ADHESION	GENERAL DISORDERS AND ADMINISTRATION SITE CONDITIONS	7	2.25 ( 1.05 - 4.81 )	2.25 ( 4.58 )
RHEUMATOID LUNG	RESPIRATORY, THORACIC AND MEDIASTINAL DISORDERS	7	0.36 ( 0.17 - 0.76 )	0.36 ( 7.94 )
PANCREATIC DISORDER	GASTROINTESTINAL DISORDERS	7	1.18 ( 0.55 - 2.49 )	1.18 ( 0.18 )
OBSTRUCTION GASTRIC	GASTROINTESTINAL DISORDERS	7	6.58 ( 2.96 - 14.65 )	6.58 ( 28.4 )
FEELING JITTERY	GENERAL DISORDERS AND ADMINISTRATION SITE CONDITIONS	7	0.67 ( 0.32 - 1.41 )	0.67 ( 1.13 )
HELICOBACTER INFECTION	INFECTIONS AND INFESTATIONS	7	0.07 ( 0.03 - 0.15 )	0.07 ( 85.47 )
RED BLOOD CELL SEDIMENTATION RATE ABNORMAL	INVESTIGATIONS	7	0.16 ( 0.08 - 0.34 )	0.16 ( 30.58 )
BONE DEFORMITY	MUSCULOSKELETAL AND CONNECTIVE TISSUE DISORDERS	7	1.67 ( 0.78 - 3.55 )	1.66 ( 1.78 )
PROSTATIC DISORDER	REPRODUCTIVE SYSTEM AND BREAST DISORDERS	7	1.54 ( 0.72 - 3.27 )	1.54 ( 1.26 )
NECK INJURY	INJURY, POISONING AND PROCEDURAL COMPLICATIONS	7	1.49 ( 0.7 - 3.18 )	1.49 ( 1.1 )
CALCINOSIS	GENERAL DISORDERS AND ADMINISTRATION SITE CONDITIONS	7	1.64 ( 0.77 - 3.48 )	1.64 ( 1.66 )
INCREASED UPPER AIRWAY SECRETION	RESPIRATORY, THORACIC AND MEDIASTINAL DISORDERS	7	0.5 ( 0.24 - 1.05 )	0.5 ( 3.5 )
LEFT VENTRICULAR HYPERTROPHY	CARDIAC DISORDERS	7	3.21 ( 1.49 - 6.94 )	3.21 ( 9.87 )
POST PROCEDURAL INFLAMMATION	INJURY, POISONING AND PROCEDURAL COMPLICATIONS	7	3.79 ( 1.74 - 8.22 )	3.79 ( 13.1 )
APNOEA	RESPIRATORY, THORACIC AND MEDIASTINAL DISORDERS	7	1.97 ( 0.92 - 4.22 )	1.97 ( 3.2 )
MITRAL VALVE INCOMPETENCE	CARDIAC DISORDERS	7	0.67 ( 0.32 - 1.41 )	0.67 ( 1.13 )
COLONIC ABSCESS	INFECTIONS AND INFESTATIONS	7	3.37 ( 1.56 - 7.29 )	3.37 ( 10.75 )
NASAL ULCER	RESPIRATORY, THORACIC AND MEDIASTINAL DISORDERS	7	1.3 ( 0.61 - 2.76 )	1.3 ( 0.46 )
VISUAL ACUITY REDUCED	EYE DISORDERS	7	0.28 ( 0.13 - 0.59 )	0.28 ( 12.64 )
ESCHERICHIA URINARY TRACT INFECTION	INFECTIONS AND INFESTATIONS	7	0.72 ( 0.34 - 1.52 )	0.72 ( 0.76 )
EXPOSURE TO COMMUNICABLE DISEASE	INJURY, POISONING AND PROCEDURAL COMPLICATIONS	7	2.03 ( 0.95 - 4.34 )	2.03 ( 3.49 )
STENOSIS	GENERAL DISORDERS AND ADMINISTRATION SITE CONDITIONS	7	3.21 ( 1.49 - 6.94 )	3.21 ( 9.87 )
EXTRASYSTOLES	CARDIAC DISORDERS	7	1.83 ( 0.86 - 3.91 )	1.83 ( 2.52 )
ONYCHOCLASIS	SKIN AND SUBCUTANEOUS TISSUE DISORDERS	7	0.69 ( 0.33 - 1.46 )	0.69 ( 0.95 )
SENSITIVE SKIN	SKIN AND SUBCUTANEOUS TISSUE DISORDERS	7	4.94 ( 2.25 - 10.83 )	4.94 ( 19.53 )
NAIL INFECTION	INFECTIONS AND INFESTATIONS	7	1.22 ( 0.58 - 2.59 )	1.22 ( 0.28 )
GASTROINTESTINAL SOUNDS ABNORMAL	GASTROINTESTINAL DISORDERS	7	3.95 ( 1.82 - 8.59 )	3.95 ( 14.01 )
CARPAL TUNNEL DECOMPRESSION	SURGICAL AND MEDICAL PROCEDURES	7	1.75 ( 0.82 - 3.73 )	1.75 ( 2.15 )
B-CELL LYMPHOMA	NEOPLASMS BENIGN, MALIGNANT AND UNSPECIFIED (INCL CYSTS AND POLYPS)	7	0.6 ( 0.29 - 1.27 )	0.6 ( 1.8 )
NEPHROPATHY	RENAL AND URINARY DISORDERS	7	1.5 ( 0.71 - 3.2 )	1.5 ( 1.13 )
OESOPHAGEAL CARCINOMA	NEOPLASMS BENIGN, MALIGNANT AND UNSPECIFIED (INCL CYSTS AND POLYPS)	7	1.29 ( 0.61 - 2.73 )	1.29 ( 0.43 )
SKIN INDURATION	SKIN AND SUBCUTANEOUS TISSUE DISORDERS	7	1.77 ( 0.83 - 3.78 )	1.77 ( 2.25 )
ONYCHOMADESIS	SKIN AND SUBCUTANEOUS TISSUE DISORDERS	7	0.49 ( 0.23 - 1.04 )	0.49 ( 3.61 )
EPIGASTRIC DISCOMFORT	GASTROINTESTINAL DISORDERS	7	0.92 ( 0.43 - 1.94 )	0.92 ( 0.05 )
HAEMARTHROSIS	MUSCULOSKELETAL AND CONNECTIVE TISSUE DISORDERS	7	2.14 ( 1 - 4.58 )	2.14 ( 4.05 )
LUMBAR RADICULOPATHY	NERVOUS SYSTEM DISORDERS	7	3.69 ( 1.7 - 8 )	3.69 ( 12.53 )
INTRADUCTAL PROLIFERATIVE BREAST LESION	NEOPLASMS BENIGN, MALIGNANT AND UNSPECIFIED (INCL CYSTS AND POLYPS)	7	2.16 ( 1.01 - 4.62 )	2.16 ( 4.13 )
ARTIFICIAL CROWN PROCEDURE	SURGICAL AND MEDICAL PROCEDURES	7	4.32 ( 1.98 - 9.42 )	4.32 ( 16.09 )
POSTURE ABNORMAL	MUSCULOSKELETAL AND CONNECTIVE TISSUE DISORDERS	7	5.42 ( 2.46 - 11.94 )	5.42 ( 22.18 )
MENISCUS OPERATION	SURGICAL AND MEDICAL PROCEDURES	7	5.22 ( 2.37 - 11.47 )	5.21 ( 21.06 )
BLOOD BILIRUBIN INCREASED	INVESTIGATIONS	7	0.83 ( 0.39 - 1.74 )	0.83 ( 0.25 )
HEART VALVE INCOMPETENCE	CARDIAC DISORDERS	7	1.21 ( 0.57 - 2.57 )	1.21 ( 0.25 )
SEBORRHOEA	SKIN AND SUBCUTANEOUS TISSUE DISORDERS	7	5.22 ( 2.37 - 11.47 )	5.21 ( 21.06 )
LEG AMPUTATION	SURGICAL AND MEDICAL PROCEDURES	7	1.64 ( 0.77 - 3.48 )	1.64 ( 1.66 )
ALTERED STATE OF CONSCIOUSNESS	NERVOUS SYSTEM DISORDERS	7	1.14 ( 0.54 - 2.41 )	1.14 ( 0.11 )
BONE EROSION	MUSCULOSKELETAL AND CONNECTIVE TISSUE DISORDERS	7	0.16 ( 0.07 - 0.33 )	0.16 ( 31.54 )
NECROTISING FASCIITIS	INFECTIONS AND INFESTATIONS	7	1.17 ( 0.55 - 2.48 )	1.17 ( 0.17 )
ACCIDENT AT WORK	INJURY, POISONING AND PROCEDURAL COMPLICATIONS	7	1.6 ( 0.75 - 3.4 )	1.6 ( 1.5 )
BLOOD LACTATE DEHYDROGENASE INCREASED	INVESTIGATIONS	7	0.64 ( 0.31 - 1.36 )	0.64 ( 1.35 )
ULCERATIVE KERATITIS	EYE DISORDERS	7	0.83 ( 0.39 - 1.77 )	0.83 ( 0.22 )
PURPURA	SKIN AND SUBCUTANEOUS TISSUE DISORDERS	7	0.98 ( 0.46 - 2.07 )	0.98 ( 0 )
BONE DENSITY DECREASED	INVESTIGATIONS	7	0.45 ( 0.21 - 0.95 )	0.45 ( 4.59 )
HYDROCEPHALUS	NERVOUS SYSTEM DISORDERS	7	2.02 ( 0.94 - 4.31 )	2.02 ( 3.42 )
TONSILLECTOMY	SURGICAL AND MEDICAL PROCEDURES	7	4.06 ( 1.87 - 8.85 )	4.06 ( 14.66 )
BREAST ABSCESS	INFECTIONS AND INFESTATIONS	7	1.87 ( 0.87 - 3.99 )	1.87 ( 2.69 )
MEDICAL DEVICE SITE JOINT INFECTION	INFECTIONS AND INFESTATIONS	7	4.13 ( 1.89 - 8.99 )	4.13 ( 15.01 )
STAPHYLOCOCCAL BACTERAEMIA	INFECTIONS AND INFESTATIONS	7	2.16 ( 1.01 - 4.62 )	2.16 ( 4.13 )
HYPERGLYCAEMIA	METABOLISM AND NUTRITION DISORDERS	7	0.74 ( 0.35 - 1.56 )	0.74 ( 0.64 )
LIGAMENT DISORDER	MUSCULOSKELETAL AND CONNECTIVE TISSUE DISORDERS	7	2.42 ( 1.13 - 5.2 )	2.42 ( 5.52 )
OVARIAN MASS	REPRODUCTIVE SYSTEM AND BREAST DISORDERS	7	3.41 ( 1.58 - 7.39 )	3.41 ( 10.99 )
POST HERPETIC NEURALGIA	NERVOUS SYSTEM DISORDERS	7	1.73 ( 0.81 - 3.68 )	1.73 ( 2.05 )
BILIARY COLIC	HEPATOBILIARY DISORDERS	7	2.14 ( 1 - 4.58 )	2.14 ( 4.05 )
ENDOTRACHEAL INTUBATION	SURGICAL AND MEDICAL PROCEDURES	7	9.53 ( 4.18 - 21.76 )	9.53 ( 43.06 )
HUNGER	GENERAL DISORDERS AND ADMINISTRATION SITE CONDITIONS	7	1.04 ( 0.49 - 2.2 )	1.04 ( 0.01 )
MEDICAL DEVICE PAIN	GENERAL DISORDERS AND ADMINISTRATION SITE CONDITIONS	7	5.76 ( 2.61 - 12.73 )	5.76 ( 24.02 )
BLADDER PAIN	RENAL AND URINARY DISORDERS	7	1.89 ( 0.89 - 4.04 )	1.89 ( 2.81 )
SPLENOMEGALY	BLOOD AND LYMPHATIC SYSTEM DISORDERS	7	0.83 ( 0.39 - 1.75 )	0.83 ( 0.25 )
TENDON PAIN	MUSCULOSKELETAL AND CONNECTIVE TISSUE DISORDERS	7	1.31 ( 0.62 - 2.78 )	1.31 ( 0.5 )
SPINAL DEFORMITY	MUSCULOSKELETAL AND CONNECTIVE TISSUE DISORDERS	7	1.59 ( 0.75 - 3.38 )	1.59 ( 1.47 )
IRON DEFICIENCY	METABOLISM AND NUTRITION DISORDERS	7	1.14 ( 0.54 - 2.41 )	1.14 ( 0.11 )
BELL'S PALSY	NERVOUS SYSTEM DISORDERS	7	5.42 ( 2.46 - 11.94 )	5.42 ( 22.18 )
IMMUNISATION REACTION	INJURY, POISONING AND PROCEDURAL COMPLICATIONS	7	4.77 ( 2.18 - 10.44 )	4.77 ( 18.58 )
SKIN NEOPLASM EXCISION	SURGICAL AND MEDICAL PROCEDURES	7	2.28 ( 1.07 - 4.89 )	2.28 ( 4.78 )
STAPHYLOCOCCAL SEPSIS	INFECTIONS AND INFESTATIONS	7	0.77 ( 0.36 - 1.62 )	0.77 ( 0.49 )
BONE SWELLING	MUSCULOSKELETAL AND CONNECTIVE TISSUE DISORDERS	7	1.4 ( 0.66 - 2.97 )	1.4 ( 0.76 )
CEREBROSPINAL FLUID LEAKAGE	NERVOUS SYSTEM DISORDERS	7	5.53 ( 2.51 - 12.19 )	5.53 ( 22.77 )
HYPERTONIC BLADDER	RENAL AND URINARY DISORDERS	7	2.36 ( 1.1 - 5.06 )	2.36 ( 5.19 )
NEOPLASM SKIN	NEOPLASMS BENIGN, MALIGNANT AND UNSPECIFIED (INCL CYSTS AND POLYPS)	7	1.45 ( 0.68 - 3.08 )	1.45 ( 0.93 )
SUPERFICIAL VEIN THROMBOSIS	VASCULAR DISORDERS	7	18.43 ( 7.51 - 45.2 )	18.43 ( 78.65 )
APPENDICITIS PERFORATED	INFECTIONS AND INFESTATIONS	7	1.55 ( 0.73 - 3.3 )	1.55 ( 1.33 )
ANKLE ARTHROPLASTY	SURGICAL AND MEDICAL PROCEDURES	7	1.61 ( 0.75 - 3.42 )	1.61 ( 1.54 )
HEART RATE ABNORMAL	INVESTIGATIONS	7	1.47 ( 0.69 - 3.13 )	1.47 ( 1.01 )
JOINT WARMTH	MUSCULOSKELETAL AND CONNECTIVE TISSUE DISORDERS	7	0.69 ( 0.33 - 1.46 )	0.69 ( 0.94 )
LUNG INFILTRATION	RESPIRATORY, THORACIC AND MEDIASTINAL DISORDERS	7	0.65 ( 0.31 - 1.37 )	0.65 ( 1.32 )
LUNG CANCER METASTATIC	NEOPLASMS BENIGN, MALIGNANT AND UNSPECIFIED (INCL CYSTS AND POLYPS)	7	0.89 ( 0.42 - 1.88 )	0.89 ( 0.1 )
POLYNEUROPATHY	NERVOUS SYSTEM DISORDERS	7	0.66 ( 0.31 - 1.39 )	0.66 ( 1.24 )
LARGE INTESTINAL HAEMORRHAGE	GASTROINTESTINAL DISORDERS	7	3.59 ( 1.66 - 7.78 )	3.59 ( 11.99 )
COMPLEX REGIONAL PAIN SYNDROME	NERVOUS SYSTEM DISORDERS	7	3.59 ( 1.66 - 7.78 )	3.59 ( 11.99 )
INFECTED CYST	INFECTIONS AND INFESTATIONS	7	1.45 ( 0.68 - 3.08 )	1.45 ( 0.93 )
INTERMITTENT CLAUDICATION	VASCULAR DISORDERS	7	4.32 ( 1.98 - 9.42 )	4.32 ( 16.09 )
BLOOD DISORDER	BLOOD AND LYMPHATIC SYSTEM DISORDERS	7	0.61 ( 0.29 - 1.28 )	0.61 ( 1.77 )
MENTAL IMPAIRMENT	NERVOUS SYSTEM DISORDERS	7	0.72 ( 0.34 - 1.52 )	0.72 ( 0.76 )
SUPRAVENTRICULAR TACHYCARDIA	CARDIAC DISORDERS	7	1.08 ( 0.51 - 2.3 )	1.08 ( 0.04 )
ORGANISING PNEUMONIA	RESPIRATORY, THORACIC AND MEDIASTINAL DISORDERS	7	0.71 ( 0.34 - 1.5 )	0.71 ( 0.8 )
HEPATIC FIBROSIS	HEPATOBILIARY DISORDERS	7	1.16 ( 0.55 - 2.45 )	1.16 ( 0.14 )
TYPE 1 DIABETES MELLITUS	METABOLISM AND NUTRITION DISORDERS	7	1.58 ( 0.74 - 3.36 )	1.58 ( 1.43 )
BLOOD ALKALINE PHOSPHATASE INCREASED	INVESTIGATIONS	7	0.44 ( 0.21 - 0.92 )	0.44 ( 5.05 )
SLEEVE GASTRECTOMY	SURGICAL AND MEDICAL PROCEDURES	7	19.74 ( 7.97 - 48.92 )	19.74 ( 83.03 )
BLOOD LOSS ANAEMIA	BLOOD AND LYMPHATIC SYSTEM DISORDERS	7	8.64 ( 3.81 - 19.57 )	8.64 ( 38.79 )
CARDIO-RESPIRATORY ARREST	CARDIAC DISORDERS	6	0.46 ( 0.21 - 1.04 )	0.46 ( 3.68 )
HERPES ZOSTER CUTANEOUS DISSEMINATED	INFECTIONS AND INFESTATIONS	6	10.77 ( 4.37 - 26.56 )	10.77 ( 41.77 )
RESPIRATORY TRACT INFECTION VIRAL	INFECTIONS AND INFESTATIONS	6	1.46 ( 0.65 - 3.3 )	1.46 ( 0.85 )
DISSEMINATED TUBERCULOSIS	INFECTIONS AND INFESTATIONS	6	0.54 ( 0.24 - 1.21 )	0.54 ( 2.33 )
CYST RUPTURE	GENERAL DISORDERS AND ADMINISTRATION SITE CONDITIONS	6	2.85 ( 1.25 - 6.54 )	2.85 ( 6.74 )
WOUND SEPSIS	INFECTIONS AND INFESTATIONS	6	13.16 ( 5.22 - 33.16 )	13.16 ( 50.57 )
RESTLESSNESS	PSYCHIATRIC DISORDERS	6	0.57 ( 0.25 - 1.28 )	0.57 ( 1.91 )
AGE-RELATED MACULAR DEGENERATION	EYE DISORDERS	6	3.76 ( 1.63 - 8.69 )	3.76 ( 11.1 )
VENOUS THROMBOSIS	VASCULAR DISORDERS	6	2.32 ( 1.02 - 5.29 )	2.32 ( 4.27 )
PRODUCT DISPENSING ERROR	INJURY, POISONING AND PROCEDURAL COMPLICATIONS	6	0.56 ( 0.25 - 1.25 )	0.56 ( 2.08 )
SKIN WRINKLING	SKIN AND SUBCUTANEOUS TISSUE DISORDERS	6	2.85 ( 1.25 - 6.54 )	2.85 ( 6.74 )
TERMINAL STATE	GENERAL DISORDERS AND ADMINISTRATION SITE CONDITIONS	6	1 ( 0.44 - 2.25 )	1 ( 0 )
ENERGY INCREASED	GENERAL DISORDERS AND ADMINISTRATION SITE CONDITIONS	6	1.42 ( 0.63 - 3.2 )	1.42 ( 0.72 )
LIP BLISTER	GASTROINTESTINAL DISORDERS	6	1.28 ( 0.57 - 2.89 )	1.28 ( 0.36 )
PRECANCEROUS CELLS PRESENT	INVESTIGATIONS	6	1.09 ( 0.49 - 2.46 )	1.09 ( 0.04 )
PHOTOPHOBIA	EYE DISORDERS	6	0.41 ( 0.18 - 0.92 )	0.41 ( 4.98 )
TOTAL LUNG CAPACITY DECREASED	INVESTIGATIONS	6	3.48 ( 1.51 - 8.03 )	3.48 ( 9.76 )
RESPIRATORY ARREST	RESPIRATORY, THORACIC AND MEDIASTINAL DISORDERS	6	0.6 ( 0.27 - 1.34 )	0.6 ( 1.6 )
ENDOMETRIAL CANCER	NEOPLASMS BENIGN, MALIGNANT AND UNSPECIFIED (INCL CYSTS AND POLYPS)	6	1.51 ( 0.67 - 3.41 )	1.51 ( 0.99 )
PERIPHERAL VASCULAR DISORDER	VASCULAR DISORDERS	6	0.75 ( 0.34 - 1.69 )	0.75 ( 0.48 )
PSEUDOMONAS INFECTION	INFECTIONS AND INFESTATIONS	6	0.73 ( 0.33 - 1.64 )	0.73 ( 0.58 )
PUSTULE	INFECTIONS AND INFESTATIONS	6	3.34 ( 1.45 - 7.68 )	3.34 ( 9.05 )
PRURITUS ALLERGIC	SKIN AND SUBCUTANEOUS TISSUE DISORDERS	6	1.06 ( 0.47 - 2.38 )	1.06 ( 0.02 )
NEAR DEATH EXPERIENCE	PSYCHIATRIC DISORDERS	6	2.96 ( 1.29 - 6.79 )	2.96 ( 7.25 )
TONGUE DISORDER	GASTROINTESTINAL DISORDERS	6	0.46 ( 0.21 - 1.04 )	0.46 ( 3.68 )
ABDOMINAL ABSCESS	INFECTIONS AND INFESTATIONS	6	1.02 ( 0.45 - 2.3 )	1.02 ( 0 )
INTESTINAL RESECTION	SURGICAL AND MEDICAL PROCEDURES	6	2.06 ( 0.91 - 4.68 )	2.06 ( 3.11 )
MENTAL FATIGUE	PSYCHIATRIC DISORDERS	6	4.23 ( 1.82 - 9.82 )	4.23 ( 13.37 )
ALLERGIC SINUSITIS	RESPIRATORY, THORACIC AND MEDIASTINAL DISORDERS	6	2.58 ( 1.13 - 5.88 )	2.57 ( 5.43 )
JOINT NEOPLASM	NEOPLASMS BENIGN, MALIGNANT AND UNSPECIFIED (INCL CYSTS AND POLYPS)	6	23.69 ( 8.61 - 65.19 )	23.69 ( 81.5 )
HYPERTHYROIDISM	ENDOCRINE DISORDERS	6	0.86 ( 0.38 - 1.93 )	0.86 ( 0.14 )
PULMONARY TUBERCULOSIS	INFECTIONS AND INFESTATIONS	6	0.3 ( 0.14 - 0.67 )	0.3 ( 9.6 )
PANCREATIC FAILURE	GASTROINTESTINAL DISORDERS	6	4.56 ( 1.96 - 10.61 )	4.56 ( 14.93 )
RHINALGIA	RESPIRATORY, THORACIC AND MEDIASTINAL DISORDERS	6	1.66 ( 0.73 - 3.75 )	1.66 ( 1.5 )
INTESTINAL MASS	GASTROINTESTINAL DISORDERS	6	2.63 ( 1.15 - 6.02 )	2.63 ( 5.69 )
CARDIAC PACEMAKER REPLACEMENT	SURGICAL AND MEDICAL PROCEDURES	6	9.48 ( 3.89 - 23.1 )	9.48 ( 36.68 )
PARONYCHIA	INFECTIONS AND INFESTATIONS	6	1.35 ( 0.6 - 3.05 )	1.35 ( 0.54 )
FACE INJURY	INJURY, POISONING AND PROCEDURAL COMPLICATIONS	6	1.17 ( 0.52 - 2.63 )	1.17 ( 0.14 )
CENTRAL VENOUS CATHETERISATION	SURGICAL AND MEDICAL PROCEDURES	6	5.92 ( 2.51 - 13.97 )	5.92 ( 21.35 )
LUNG ABSCESS	INFECTIONS AND INFESTATIONS	6	1.25 ( 0.55 - 2.81 )	1.25 ( 0.28 )
ASPIRATION	RESPIRATORY, THORACIC AND MEDIASTINAL DISORDERS	6	1.28 ( 0.57 - 2.89 )	1.28 ( 0.36 )
BONE NEOPLASM	NEOPLASMS BENIGN, MALIGNANT AND UNSPECIFIED (INCL CYSTS AND POLYPS)	6	3.29 ( 1.43 - 7.57 )	3.29 ( 8.83 )
KIDNEY ENLARGEMENT	RENAL AND URINARY DISORDERS	6	6.23 ( 2.64 - 14.75 )	6.23 ( 22.77 )
HAEMORRHAGIC STROKE	NERVOUS SYSTEM DISORDERS	6	1.57 ( 0.69 - 3.55 )	1.57 ( 1.19 )
GASTROINTESTINAL BACTERIAL INFECTION	INFECTIONS AND INFESTATIONS	6	2.58 ( 1.13 - 5.88 )	2.57 ( 5.43 )
THROAT CANCER	NEOPLASMS BENIGN, MALIGNANT AND UNSPECIFIED (INCL CYSTS AND POLYPS)	6	1.48 ( 0.66 - 3.35 )	1.48 ( 0.9 )
DEAFNESS NEUROSENSORY	EAR AND LABYRINTH DISORDERS	6	0.96 ( 0.43 - 2.16 )	0.96 ( 0.01 )
LYMPHADENECTOMY	SURGICAL AND MEDICAL PROCEDURES	6	2.63 ( 1.15 - 6.02 )	2.63 ( 5.69 )
DEVICE FASTENER ISSUE	PRODUCT ISSUES	6	7.18 ( 3.01 - 17.13 )	7.18 ( 27 )
PRODUCT USE COMPLAINT	INJURY, POISONING AND PROCEDURAL COMPLICATIONS	6	2.55 ( 1.12 - 5.82 )	2.55 ( 5.3 )
GUILLAIN-BARRE SYNDROME	NERVOUS SYSTEM DISORDERS	6	1.16 ( 0.52 - 2.62 )	1.16 ( 0.13 )
MICTURITION URGENCY	RENAL AND URINARY DISORDERS	6	0.76 ( 0.34 - 1.71 )	0.76 ( 0.43 )
ANGER	PSYCHIATRIC DISORDERS	6	0.64 ( 0.29 - 1.43 )	0.64 ( 1.19 )
MUSCLE RIGIDITY	MUSCULOSKELETAL AND CONNECTIVE TISSUE DISORDERS	6	1.58 ( 0.7 - 3.57 )	1.58 ( 1.23 )
BOWEL MOVEMENT IRREGULARITY	GASTROINTESTINAL DISORDERS	6	1.23 ( 0.55 - 2.78 )	1.23 ( 0.26 )
HEPATIC LESION	HEPATOBILIARY DISORDERS	6	1.87 ( 0.82 - 4.23 )	1.87 ( 2.3 )
GASTROINTESTINAL OEDEMA	GASTROINTESTINAL DISORDERS	6	4.94 ( 2.11 - 11.53 )	4.94 ( 16.74 )
SMALL INTESTINAL OBSTRUCTION	GASTROINTESTINAL DISORDERS	6	0.92 ( 0.41 - 2.07 )	0.92 ( 0.04 )
TENDON OPERATION	SURGICAL AND MEDICAL PROCEDURES	6	1.94 ( 0.86 - 4.41 )	1.94 ( 2.61 )
DEMENTIA ALZHEIMER'S TYPE	NERVOUS SYSTEM DISORDERS	6	0.57 ( 0.26 - 1.28 )	0.57 ( 1.87 )
INTESTINAL OPERATION	SURGICAL AND MEDICAL PROCEDURES	6	3.2 ( 1.39 - 7.36 )	3.2 ( 8.4 )
MASTECTOMY	SURGICAL AND MEDICAL PROCEDURES	6	3.2 ( 1.39 - 7.36 )	3.2 ( 8.4 )
SENSATION OF FOREIGN BODY	GENERAL DISORDERS AND ADMINISTRATION SITE CONDITIONS	6	0.97 ( 0.43 - 2.19 )	0.97 ( 0 )
HYPERLIPIDAEMIA	METABOLISM AND NUTRITION DISORDERS	6	0.66 ( 0.29 - 1.47 )	0.66 ( 1.06 )
OSTEOCHONDROSIS	MUSCULOSKELETAL AND CONNECTIVE TISSUE DISORDERS	6	2.12 ( 0.93 - 4.81 )	2.12 ( 3.35 )
GOITRE	ENDOCRINE DISORDERS	6	0.72 ( 0.32 - 1.61 )	0.72 ( 0.64 )
HYPOVITAMINOSIS	METABOLISM AND NUTRITION DISORDERS	6	4.23 ( 1.82 - 9.82 )	4.23 ( 13.37 )
MENINGIOMA	NEOPLASMS BENIGN, MALIGNANT AND UNSPECIFIED (INCL CYSTS AND POLYPS)	6	1.35 ( 0.6 - 3.05 )	1.35 ( 0.54 )
ILEOSTOMY	SURGICAL AND MEDICAL PROCEDURES	6	3.7 ( 1.6 - 8.55 )	3.7 ( 10.82 )
WRONG TECHNIQUE IN PRODUCT USAGE PROCESS	INJURY, POISONING AND PROCEDURAL COMPLICATIONS	6	0.03 ( 0.01 - 0.06 )	0.03 ( 225.52 )
VAGINAL PROLAPSE	REPRODUCTIVE SYSTEM AND BREAST DISORDERS	6	4.31 ( 1.85 - 10 )	4.31 ( 13.74 )
PHOTOSENSITIVITY REACTION	SKIN AND SUBCUTANEOUS TISSUE DISORDERS	6	0.27 ( 0.12 - 0.6 )	0.27 ( 11.9 )
BACTERIAL SEPSIS	INFECTIONS AND INFESTATIONS	6	2.19 ( 0.96 - 4.99 )	2.19 ( 3.69 )
NECROSIS	GENERAL DISORDERS AND ADMINISTRATION SITE CONDITIONS	6	0.94 ( 0.42 - 2.1 )	0.94 ( 0.03 )
IMMOBILE	SOCIAL CIRCUMSTANCES	6	0.52 ( 0.23 - 1.17 )	0.52 ( 2.61 )
DEMYELINATION	NERVOUS SYSTEM DISORDERS	6	0.45 ( 0.2 - 1 )	0.45 ( 4.08 )
BLINDNESS TRANSIENT	EYE DISORDERS	6	1.69 ( 0.75 - 3.83 )	1.69 ( 1.63 )
ACNE CYSTIC	SKIN AND SUBCUTANEOUS TISSUE DISORDERS	6	2.13 ( 0.94 - 4.85 )	2.13 ( 3.43 )
DIVERTICULUM INTESTINAL HAEMORRHAGIC	GASTROINTESTINAL DISORDERS	6	3.7 ( 1.6 - 8.55 )	3.7 ( 10.82 )
PERIPHERAL ARTERIAL OCCLUSIVE DISEASE	VASCULAR DISORDERS	6	0.94 ( 0.42 - 2.1 )	0.94 ( 0.03 )
SINUS NODE DYSFUNCTION	CARDIAC DISORDERS	6	4.83 ( 2.07 - 11.29 )	4.83 ( 16.26 )
CERVIX CARCINOMA	NEOPLASMS BENIGN, MALIGNANT AND UNSPECIFIED (INCL CYSTS AND POLYPS)	6	0.95 ( 0.42 - 2.14 )	0.95 ( 0.01 )
INTERVERTEBRAL DISC COMPRESSION	MUSCULOSKELETAL AND CONNECTIVE TISSUE DISORDERS	6	1.39 ( 0.61 - 3.13 )	1.39 ( 0.62 )
CALCULUS BLADDER	RENAL AND URINARY DISORDERS	6	3.25 ( 1.41 - 7.46 )	3.25 ( 8.61 )
AMENORRHOEA	REPRODUCTIVE SYSTEM AND BREAST DISORDERS	6	1.54 ( 0.68 - 3.48 )	1.54 ( 1.09 )
RAYNAUD'S PHENOMENON	VASCULAR DISORDERS	6	0.58 ( 0.26 - 1.29 )	0.58 ( 1.84 )
LABYRINTHITIS	INFECTIONS AND INFESTATIONS	6	0.77 ( 0.34 - 1.73 )	0.77 ( 0.4 )
EJECTION FRACTION DECREASED	INVESTIGATIONS	6	1.29 ( 0.57 - 2.9 )	1.29 ( 0.37 )
OSTEITIS	MUSCULOSKELETAL AND CONNECTIVE TISSUE DISORDERS	6	0.87 ( 0.39 - 1.96 )	0.87 ( 0.11 )
SKIN SWELLING	SKIN AND SUBCUTANEOUS TISSUE DISORDERS	6	0.92 ( 0.41 - 2.07 )	0.92 ( 0.04 )
CHOKING SENSATION	RESPIRATORY, THORACIC AND MEDIASTINAL DISORDERS	6	1.9 ( 0.84 - 4.3 )	1.9 ( 2.42 )
BONE MARROW OEDEMA	BLOOD AND LYMPHATIC SYSTEM DISORDERS	6	3.88 ( 1.68 - 8.98 )	3.88 ( 11.7 )
SKIN WOUND	INJURY, POISONING AND PROCEDURAL COMPLICATIONS	6	2.06 ( 0.91 - 4.68 )	2.06 ( 3.11 )
TYMPANIC MEMBRANE PERFORATION	EAR AND LABYRINTH DISORDERS	6	1.1 ( 0.49 - 2.47 )	1.1 ( 0.05 )
MOOD SWINGS	PSYCHIATRIC DISORDERS	6	0.5 ( 0.22 - 1.12 )	0.5 ( 2.93 )
TINEA PEDIS	INFECTIONS AND INFESTATIONS	6	1.1 ( 0.49 - 2.48 )	1.1 ( 0.05 )
SUICIDE ATTEMPT	PSYCHIATRIC DISORDERS	6	0.94 ( 0.42 - 2.11 )	0.94 ( 0.02 )
HORMONE LEVEL ABNORMAL	INVESTIGATIONS	6	2.01 ( 0.88 - 4.56 )	2.01 ( 2.89 )
SUTURE RUPTURE	INJURY, POISONING AND PROCEDURAL COMPLICATIONS	6	2.75 ( 1.2 - 6.3 )	2.75 ( 6.27 )
PEPTIC ULCER	GASTROINTESTINAL DISORDERS	6	1.58 ( 0.7 - 3.57 )	1.58 ( 1.23 )
GASTROINTESTINAL CARCINOMA	NEOPLASMS BENIGN, MALIGNANT AND UNSPECIFIED (INCL CYSTS AND POLYPS)	6	1.06 ( 0.47 - 2.38 )	1.06 ( 0.02 )
HERPES OPHTHALMIC	INFECTIONS AND INFESTATIONS	6	1.77 ( 0.78 - 4.01 )	1.77 ( 1.92 )
TONGUE DISCOMFORT	GASTROINTESTINAL DISORDERS	6	2.92 ( 1.28 - 6.7 )	2.92 ( 7.08 )
VISUAL FIELD DEFECT	EYE DISORDERS	6	1.17 ( 0.52 - 2.64 )	1.17 ( 0.15 )
STERNAL FRACTURE	INJURY, POISONING AND PROCEDURAL COMPLICATIONS	6	3.38 ( 1.47 - 7.79 )	3.38 ( 9.28 )
METASTASES TO LYMPH NODES	NEOPLASMS BENIGN, MALIGNANT AND UNSPECIFIED (INCL CYSTS AND POLYPS)	6	1.25 ( 0.56 - 2.83 )	1.25 ( 0.3 )
SUDDEN HEARING LOSS	EAR AND LABYRINTH DISORDERS	6	2.1 ( 0.92 - 4.77 )	2.1 ( 3.27 )
ORAL DISCOMFORT	GASTROINTESTINAL DISORDERS	6	0.48 ( 0.22 - 1.08 )	0.48 ( 3.27 )
DENTAL PROSTHESIS PLACEMENT	SURGICAL AND MEDICAL PROCEDURES	6	6.23 ( 2.64 - 14.75 )	6.23 ( 22.77 )
AORTIC DISSECTION	VASCULAR DISORDERS	6	2.06 ( 0.91 - 4.68 )	2.06 ( 3.11 )
CATHETER PLACEMENT	SURGICAL AND MEDICAL PROCEDURES	6	5.78 ( 2.45 - 13.61 )	5.78 ( 20.68 )
BLOOD URIC ACID INCREASED	INVESTIGATIONS	6	1.36 ( 0.6 - 3.07 )	1.36 ( 0.56 )
MYCOBACTERIUM AVIUM COMPLEX INFECTION	INFECTIONS AND INFESTATIONS	6	0.94 ( 0.42 - 2.1 )	0.94 ( 0.03 )
COLOSTOMY	SURGICAL AND MEDICAL PROCEDURES	6	2.55 ( 1.12 - 5.82 )	2.55 ( 5.3 )
GASTROINTESTINAL SURGERY	SURGICAL AND MEDICAL PROCEDURES	6	10.3 ( 4.19 - 25.3 )	10.3 ( 39.96 )
INSURANCE ISSUE	SOCIAL CIRCUMSTANCES	6	0.49 ( 0.22 - 1.09 )	0.49 ( 3.21 )
PROSTHESIS IMPLANTATION	SURGICAL AND MEDICAL PROCEDURES	6	4.08 ( 1.76 - 9.47 )	4.08 ( 12.67 )
PROTEIN TOTAL INCREASED	INVESTIGATIONS	6	2.75 ( 1.2 - 6.3 )	2.75 ( 6.27 )
INCISION SITE ERYTHEMA	INJURY, POISONING AND PROCEDURAL COMPLICATIONS	6	3.12 ( 1.36 - 7.16 )	3.12 ( 8 )
HEPATITIS B	INFECTIONS AND INFESTATIONS	6	0.63 ( 0.28 - 1.4 )	0.63 ( 1.33 )
PHLEBITIS	VASCULAR DISORDERS	6	0.71 ( 0.32 - 1.59 )	0.71 ( 0.71 )
ULNA FRACTURE	INJURY, POISONING AND PROCEDURAL COMPLICATIONS	6	2.49 ( 1.09 - 5.69 )	2.49 ( 5.05 )
DERMATITIS ACNEIFORM	SKIN AND SUBCUTANEOUS TISSUE DISORDERS	6	2.26 ( 0.99 - 5.14 )	2.26 ( 3.97 )
URINARY TRACT INFECTION BACTERIAL	INFECTIONS AND INFESTATIONS	6	1.14 ( 0.51 - 2.58 )	1.14 ( 0.11 )
CERVICAL DYSPLASIA	REPRODUCTIVE SYSTEM AND BREAST DISORDERS	6	1.67 ( 0.74 - 3.78 )	1.67 ( 1.54 )
CHONDROCALCINOSIS	MUSCULOSKELETAL AND CONNECTIVE TISSUE DISORDERS	6	3.12 ( 1.36 - 7.16 )	3.12 ( 8 )
ANGINA UNSTABLE	CARDIAC DISORDERS	6	0.96 ( 0.43 - 2.16 )	0.96 ( 0.01 )
OOPHORECTOMY	SURGICAL AND MEDICAL PROCEDURES	6	3.76 ( 1.63 - 8.69 )	3.76 ( 11.1 )
HERPES ZOSTER DISSEMINATED	INFECTIONS AND INFESTATIONS	6	3.38 ( 1.47 - 7.79 )	3.38 ( 9.28 )
BRAIN NEOPLASM MALIGNANT	NEOPLASMS BENIGN, MALIGNANT AND UNSPECIFIED (INCL CYSTS AND POLYPS)	6	2.72 ( 1.19 - 6.23 )	2.72 ( 6.12 )
ABNORMAL DREAMS	PSYCHIATRIC DISORDERS	6	1.44 ( 0.64 - 3.26 )	1.44 ( 0.79 )
PERIORBITAL SWELLING	EYE DISORDERS	6	3.48 ( 1.51 - 8.03 )	3.48 ( 9.76 )
NEUROENDOCRINE CARCINOMA OF THE SKIN	NEOPLASMS BENIGN, MALIGNANT AND UNSPECIFIED (INCL CYSTS AND POLYPS)	6	1.53 ( 0.68 - 3.45 )	1.53 ( 1.06 )
PHOTOPSIA	EYE DISORDERS	6	1.51 ( 0.67 - 3.41 )	1.51 ( 0.99 )
OSTOMY BAG PLACEMENT	SURGICAL AND MEDICAL PROCEDURES	6	33.85 ( 11.37 - 100.71 )	33.84 ( 102.97 )
MOTOR DYSFUNCTION	NERVOUS SYSTEM DISORDERS	5	0.51 ( 0.21 - 1.24 )	0.51 ( 2.3 )
PAPILLOEDEMA	EYE DISORDERS	5	2.38 ( 0.96 - 5.87 )	2.38 ( 3.77 )
MENTAL STATUS CHANGES	PSYCHIATRIC DISORDERS	5	0.61 ( 0.25 - 1.47 )	0.61 ( 1.25 )
PHARYNGEAL DISORDER	RESPIRATORY, THORACIC AND MEDIASTINAL DISORDERS	5	0.84 ( 0.34 - 2.03 )	0.84 ( 0.16 )
VASCULAR GRAFT	SURGICAL AND MEDICAL PROCEDURES	5	1.95 ( 0.8 - 4.8 )	1.95 ( 2.22 )
INTESTINAL POLYP	GASTROINTESTINAL DISORDERS	5	0.85 ( 0.35 - 2.07 )	0.85 ( 0.12 )
METASTATIC MALIGNANT MELANOMA	NEOPLASMS BENIGN, MALIGNANT AND UNSPECIFIED (INCL CYSTS AND POLYPS)	5	2.74 ( 1.11 - 6.79 )	2.74 ( 5.17 )
BUNION OPERATION	SURGICAL AND MEDICAL PROCEDURES	5	1.22 ( 0.5 - 2.97 )	1.22 ( 0.19 )
BREAST CANCER STAGE I	NEOPLASMS BENIGN, MALIGNANT AND UNSPECIFIED (INCL CYSTS AND POLYPS)	5	2.22 ( 0.9 - 5.46 )	2.22 ( 3.17 )
SUDDEN DEATH	GENERAL DISORDERS AND ADMINISTRATION SITE CONDITIONS	5	0.8 ( 0.33 - 1.94 )	0.8 ( 0.25 )
SENSITIVITY TO WEATHER CHANGE	GENERAL DISORDERS AND ADMINISTRATION SITE CONDITIONS	5	0.12 ( 0.05 - 0.28 )	0.12 ( 32.88 )
INCISION SITE SWELLING	INJURY, POISONING AND PROCEDURAL COMPLICATIONS	5	7.59 ( 2.92 - 19.77 )	7.59 ( 24.01 )
EYE CONTUSION	INJURY, POISONING AND PROCEDURAL COMPLICATIONS	5	1.59 ( 0.65 - 3.89 )	1.59 ( 1.06 )
CARDIAC ABLATION	SURGICAL AND MEDICAL PROCEDURES	5	2.6 ( 1.05 - 6.42 )	2.6 ( 4.61 )
PRODUCT ADMINISTRATION ERROR	INJURY, POISONING AND PROCEDURAL COMPLICATIONS	5	0.5 ( 0.21 - 1.2 )	0.5 ( 2.49 )
NEPHROPATHY TOXIC	RENAL AND URINARY DISORDERS	5	2.35 ( 0.95 - 5.79 )	2.35 ( 3.66 )
OSTEOTOMY	SURGICAL AND MEDICAL PROCEDURES	5	6.81 ( 2.64 - 17.59 )	6.81 ( 21.13 )
CARDIAC DYSFUNCTION	CARDIAC DISORDERS	5	2.95 ( 1.19 - 7.31 )	2.95 ( 5.98 )
SUTURE INSERTION	SURGICAL AND MEDICAL PROCEDURES	5	5.81 ( 2.27 - 14.85 )	5.81 ( 17.34 )
URINARY BLADDER SUSPENSION	SURGICAL AND MEDICAL PROCEDURES	5	10.39 ( 3.88 - 27.83 )	10.39 ( 33.59 )
VENTRICULAR EXTRASYSTOLES	CARDIAC DISORDERS	5	0.89 ( 0.37 - 2.17 )	0.89 ( 0.06 )
HEAVY EXPOSURE TO ULTRAVIOLET LIGHT	INJURY, POISONING AND PROCEDURAL COMPLICATIONS	5	8.97 ( 3.4 - 23.7 )	8.97 ( 28.86 )
STRESS CARDIOMYOPATHY	CARDIAC DISORDERS	5	1.46 ( 0.6 - 3.57 )	1.46 ( 0.7 )
EATING DISORDER	PSYCHIATRIC DISORDERS	5	0.28 ( 0.11 - 0.66 )	0.28 ( 9.47 )
OVARIAN CYST RUPTURED	REPRODUCTIVE SYSTEM AND BREAST DISORDERS	5	2.99 ( 1.21 - 7.43 )	2.99 ( 6.16 )
ACNE PUSTULAR	INFECTIONS AND INFESTATIONS	5	7.59 ( 2.92 - 19.77 )	7.59 ( 24.01 )
GLOMERULAR FILTRATION RATE DECREASED	INVESTIGATIONS	5	0.92 ( 0.38 - 2.24 )	0.92 ( 0.03 )
TRICUSPID VALVE INCOMPETENCE	CARDIAC DISORDERS	5	0.94 ( 0.39 - 2.28 )	0.94 ( 0.02 )
PULMONARY FUNCTION TEST DECREASED	INVESTIGATIONS	5	2.06 ( 0.84 - 5.05 )	2.06 ( 2.58 )
FAECALOMA	GASTROINTESTINAL DISORDERS	5	1.5 ( 0.61 - 3.65 )	1.5 ( 0.79 )
BRONCHIOLITIS	INFECTIONS AND INFESTATIONS	5	1.62 ( 0.66 - 3.96 )	1.62 ( 1.13 )
HIDRADENITIS	SKIN AND SUBCUTANEOUS TISSUE DISORDERS	5	0.88 ( 0.36 - 2.13 )	0.88 ( 0.08 )
NIGHTMARE	PSYCHIATRIC DISORDERS	5	0.7 ( 0.29 - 1.69 )	0.7 ( 0.64 )
WEIGHT FLUCTUATION	METABOLISM AND NUTRITION DISORDERS	5	0.45 ( 0.19 - 1.1 )	0.45 ( 3.23 )
PYODERMA GANGRENOSUM	SKIN AND SUBCUTANEOUS TISSUE DISORDERS	5	0.73 ( 0.3 - 1.77 )	0.73 ( 0.49 )
HAEMOCHROMATOSIS	METABOLISM AND NUTRITION DISORDERS	5	2.99 ( 1.21 - 7.43 )	2.99 ( 6.16 )
LARGE INTESTINAL OBSTRUCTION	GASTROINTESTINAL DISORDERS	5	2.01 ( 0.82 - 4.95 )	2.01 ( 2.43 )
ORTHOSTATIC HYPOTENSION	VASCULAR DISORDERS	5	1.15 ( 0.47 - 2.79 )	1.15 ( 0.09 )
NASAL DISCOMFORT	RESPIRATORY, THORACIC AND MEDIASTINAL DISORDERS	5	0.63 ( 0.26 - 1.54 )	0.63 ( 1.03 )
BLADDER NEOPLASM	NEOPLASMS BENIGN, MALIGNANT AND UNSPECIFIED (INCL CYSTS AND POLYPS)	5	1.06 ( 0.44 - 2.58 )	1.06 ( 0.02 )
VULVAL CANCER	NEOPLASMS BENIGN, MALIGNANT AND UNSPECIFIED (INCL CYSTS AND POLYPS)	5	2.7 ( 1.09 - 6.69 )	2.7 ( 5.03 )
HEART VALVE REPLACEMENT	SURGICAL AND MEDICAL PROCEDURES	5	2.38 ( 0.96 - 5.87 )	2.38 ( 3.77 )
FACE OEDEMA	GENERAL DISORDERS AND ADMINISTRATION SITE CONDITIONS	5	0.62 ( 0.26 - 1.51 )	0.62 ( 1.12 )
TUMOUR MARKER INCREASED	INVESTIGATIONS	5	3.87 ( 1.54 - 9.7 )	3.87 ( 9.7 )
PANCREATIC CYST	GASTROINTESTINAL DISORDERS	5	1.66 ( 0.68 - 4.06 )	1.66 ( 1.26 )
LIGAMENT INJURY	INJURY, POISONING AND PROCEDURAL COMPLICATIONS	5	1.58 ( 0.65 - 3.86 )	1.58 ( 1.02 )
SINGLE FUNCTIONAL KIDNEY	RENAL AND URINARY DISORDERS	5	5.48 ( 2.15 - 13.98 )	5.48 ( 16.1 )
ONYCHALGIA	SKIN AND SUBCUTANEOUS TISSUE DISORDERS	5	3.72 ( 1.49 - 9.32 )	3.72 ( 9.11 )
BLOOD CREATININE ABNORMAL	INVESTIGATIONS	5	2.41 ( 0.98 - 5.94 )	2.41 ( 3.88 )
PAPILLARY THYROID CANCER	NEOPLASMS BENIGN, MALIGNANT AND UNSPECIFIED (INCL CYSTS AND POLYPS)	5	1.92 ( 0.78 - 4.7 )	1.92 ( 2.09 )
RECURRENT CANCER	NEOPLASMS BENIGN, MALIGNANT AND UNSPECIFIED (INCL CYSTS AND POLYPS)	5	3.95 ( 1.57 - 9.9 )	3.95 ( 10.01 )
DELUSION	PSYCHIATRIC DISORDERS	5	1.59 ( 0.65 - 3.89 )	1.59 ( 1.06 )
DEGENERATIVE BONE DISEASE	MUSCULOSKELETAL AND CONNECTIVE TISSUE DISORDERS	5	4.7 ( 1.86 - 11.88 )	4.7 ( 13.02 )
ESCHERICHIA SEPSIS	INFECTIONS AND INFESTATIONS	5	1.39 ( 0.57 - 3.39 )	1.39 ( 0.53 )
BLOOD BLISTER	SKIN AND SUBCUTANEOUS TISSUE DISORDERS	5	0.87 ( 0.36 - 2.1 )	0.87 ( 0.1 )
BILIARY OBSTRUCTION	HEPATOBILIARY DISORDERS	5	4.82 ( 1.9 - 12.19 )	4.82 ( 13.47 )
LIMB CRUSHING INJURY	INJURY, POISONING AND PROCEDURAL COMPLICATIONS	5	2.7 ( 1.09 - 6.69 )	2.7 ( 5.03 )
DEPRESSED LEVEL OF CONSCIOUSNESS	NERVOUS SYSTEM DISORDERS	5	0.59 ( 0.24 - 1.42 )	0.59 ( 1.43 )
GASTROINTESTINAL MOTILITY DISORDER	GASTROINTESTINAL DISORDERS	5	1.83 ( 0.75 - 4.48 )	1.83 ( 1.79 )
SYSTEMIC LUPUS ERYTHEMATOSUS RASH	SKIN AND SUBCUTANEOUS TISSUE DISORDERS	5	0.81 ( 0.33 - 1.96 )	0.81 ( 0.22 )
PROSTATIC OPERATION	SURGICAL AND MEDICAL PROCEDURES	5	4.7 ( 1.86 - 11.88 )	4.7 ( 13.02 )
POST PROCEDURAL DISCHARGE	INJURY, POISONING AND PROCEDURAL COMPLICATIONS	5	1.81 ( 0.74 - 4.44 )	1.81 ( 1.74 )
UTERINE HAEMORRHAGE	REPRODUCTIVE SYSTEM AND BREAST DISORDERS	5	1.2 ( 0.49 - 2.93 )	1.2 ( 0.17 )
PRECANCEROUS CONDITION	GENERAL DISORDERS AND ADMINISTRATION SITE CONDITIONS	5	5.06 ( 2 - 12.84 )	5.06 ( 14.45 )
PALLIATIVE CARE	SURGICAL AND MEDICAL PROCEDURES	5	10.97 ( 4.07 - 29.54 )	10.97 ( 35.45 )
PSEUDARTHROSIS	MUSCULOSKELETAL AND CONNECTIVE TISSUE DISORDERS	5	3.95 ( 1.57 - 9.9 )	3.95 ( 10.01 )
BODY TEMPERATURE DECREASED	INVESTIGATIONS	5	0.19 ( 0.08 - 0.46 )	0.19 ( 17.16 )
ORAL FUNGAL INFECTION	INFECTIONS AND INFESTATIONS	5	0.77 ( 0.32 - 1.87 )	0.77 ( 0.33 )
OCULAR PROCEDURAL COMPLICATION	INJURY, POISONING AND PROCEDURAL COMPLICATIONS	5	7.05 ( 2.72 - 18.26 )	7.05 ( 22.03 )
PYELONEPHRITIS ACUTE	INFECTIONS AND INFESTATIONS	5	1.22 ( 0.5 - 2.97 )	1.22 ( 0.19 )
SKIN DISCHARGE	SKIN AND SUBCUTANEOUS TISSUE DISORDERS	5	17.95 ( 6.24 - 51.66 )	17.95 ( 55.01 )
SPINAL SYNOVIAL CYST	MUSCULOSKELETAL AND CONNECTIVE TISSUE DISORDERS	5	12.34 ( 4.52 - 33.68 )	12.34 ( 39.69 )
EYE MOVEMENT DISORDER	EYE DISORDERS	5	2.86 ( 1.15 - 7.09 )	2.86 ( 5.64 )
ABNORMAL FAECES	GASTROINTESTINAL DISORDERS	5	1.36 ( 0.56 - 3.32 )	1.36 ( 0.46 )
INCISIONAL HERNIA	INJURY, POISONING AND PROCEDURAL COMPLICATIONS	5	1.66 ( 0.68 - 4.06 )	1.66 ( 1.26 )
STOMACH MASS	GASTROINTESTINAL DISORDERS	5	3.29 ( 1.32 - 8.19 )	3.29 ( 7.36 )
REACTIVE GASTROPATHY	INJURY, POISONING AND PROCEDURAL COMPLICATIONS	5	4.03 ( 1.61 - 10.11 )	4.03 ( 10.33 )
IMPLANT SITE INFECTION	INFECTIONS AND INFESTATIONS	5	3.35 ( 1.34 - 8.34 )	3.35 ( 7.58 )
DIABETIC KETOACIDOSIS	METABOLISM AND NUTRITION DISORDERS	5	1.35 ( 0.55 - 3.3 )	1.35 ( 0.44 )
SOLAR LENTIGO	SKIN AND SUBCUTANEOUS TISSUE DISORDERS	5	3.4 ( 1.37 - 8.49 )	3.4 ( 7.81 )
TENOSYNOVITIS	MUSCULOSKELETAL AND CONNECTIVE TISSUE DISORDERS	5	0.23 ( 0.1 - 0.56 )	0.23 ( 12.52 )
VARICELLA	INFECTIONS AND INFESTATIONS	5	1.18 ( 0.49 - 2.88 )	1.18 ( 0.14 )
MINERAL SUPPLEMENTATION	SURGICAL AND MEDICAL PROCEDURES	5	9.87 ( 3.7 - 26.3 )	9.87 ( 31.89 )
CREPITATIONS	GENERAL DISORDERS AND ADMINISTRATION SITE CONDITIONS	5	0.55 ( 0.23 - 1.33 )	0.55 ( 1.8 )
COCCIDIOIDOMYCOSIS	INFECTIONS AND INFESTATIONS	5	1.13 ( 0.47 - 2.76 )	1.13 ( 0.08 )
LIVING IN RESIDENTIAL INSTITUTION	SOCIAL CIRCUMSTANCES	5	4.7 ( 1.86 - 11.88 )	4.7 ( 13.02 )
RHINITIS ALLERGIC	RESPIRATORY, THORACIC AND MEDIASTINAL DISORDERS	5	1.06 ( 0.43 - 2.57 )	1.06 ( 0.01 )
RETINAL HAEMORRHAGE	EYE DISORDERS	5	1.54 ( 0.63 - 3.77 )	1.54 ( 0.92 )
SPINAL FUSION ACQUIRED	MUSCULOSKELETAL AND CONNECTIVE TISSUE DISORDERS	5	4.82 ( 1.9 - 12.19 )	4.82 ( 13.47 )
MULTIPLE SCLEROSIS RELAPSE	NERVOUS SYSTEM DISORDERS	5	2.82 ( 1.14 - 6.99 )	2.82 ( 5.48 )
PORTAL VEIN THROMBOSIS	HEPATOBILIARY DISORDERS	5	3.35 ( 1.34 - 8.34 )	3.35 ( 7.58 )
MYOCARDIAL INJURY	CARDIAC DISORDERS	5	21.94 ( 7.35 - 65.46 )	21.94 ( 64.22 )
NON-HODGKIN'S LYMPHOMA	NEOPLASMS BENIGN, MALIGNANT AND UNSPECIFIED (INCL CYSTS AND POLYPS)	5	0.26 ( 0.11 - 0.63 )	0.26 ( 10.48 )
NOSOCOMIAL INFECTION	INFECTIONS AND INFESTATIONS	5	1.11 ( 0.46 - 2.7 )	1.11 ( 0.05 )
DACRYOSTENOSIS ACQUIRED	EYE DISORDERS	5	2.86 ( 1.15 - 7.09 )	2.86 ( 5.64 )
RENAL CELL CARCINOMA	NEOPLASMS BENIGN, MALIGNANT AND UNSPECIFIED (INCL CYSTS AND POLYPS)	5	1.07 ( 0.44 - 2.61 )	1.07 ( 0.02 )
NEUROPATHIC ARTHROPATHY	MUSCULOSKELETAL AND CONNECTIVE TISSUE DISORDERS	5	5.98 ( 2.34 - 15.32 )	5.98 ( 18.02 )
GASTROINTESTINAL WALL THICKENING	GASTROINTESTINAL DISORDERS	5	7.05 ( 2.72 - 18.26 )	7.05 ( 22.03 )
EYE ULCER	EYE DISORDERS	5	1.75 ( 0.71 - 4.28 )	1.75 ( 1.53 )
SACROILIAC JOINT DYSFUNCTION	MUSCULOSKELETAL AND CONNECTIVE TISSUE DISORDERS	5	197.43 ( 23.06 - 1689.95 )	197.42 ( 162.85 )
MALIGNANT NEOPLASM PROGRESSION	NEOPLASMS BENIGN, MALIGNANT AND UNSPECIFIED (INCL CYSTS AND POLYPS)	5	0.82 ( 0.34 - 1.98 )	0.82 ( 0.2 )
WISDOM TEETH REMOVAL	SURGICAL AND MEDICAL PROCEDURES	5	2.63 ( 1.06 - 6.51 )	2.63 ( 4.74 )
ENZYME LEVEL INCREASED	INVESTIGATIONS	5	2.99 ( 1.21 - 7.43 )	2.99 ( 6.16 )
GANGRENE	INFECTIONS AND INFESTATIONS	5	0.71 ( 0.29 - 1.71 )	0.71 ( 0.59 )
PERIPHERAL NERVE INJURY	INJURY, POISONING AND PROCEDURAL COMPLICATIONS	5	4.11 ( 1.64 - 10.33 )	4.11 ( 10.67 )
PROSTATIC SPECIFIC ANTIGEN INCREASED	INVESTIGATIONS	5	1.42 ( 0.58 - 3.47 )	1.42 ( 0.6 )
PROSTATITIS	REPRODUCTIVE SYSTEM AND BREAST DISORDERS	5	1.36 ( 0.56 - 3.32 )	1.36 ( 0.46 )
ADRENAL INSUFFICIENCY	ENDOCRINE DISORDERS	5	0.41 ( 0.17 - 0.98 )	0.41 ( 4.32 )
EAR SWELLING	EAR AND LABYRINTH DISORDERS	5	1.97 ( 0.8 - 4.85 )	1.97 ( 2.29 )
DUODENAL ULCER	GASTROINTESTINAL DISORDERS	5	0.74 ( 0.31 - 1.8 )	0.74 ( 0.44 )
HEPATITIS B REACTIVATION	INFECTIONS AND INFESTATIONS	5	0.78 ( 0.32 - 1.88 )	0.78 ( 0.31 )
HALLUCINATION, VISUAL	PSYCHIATRIC DISORDERS	5	1.43 ( 0.59 - 3.49 )	1.43 ( 0.63 )
DEVICE PHYSICAL PROPERTY ISSUE	PRODUCT ISSUES	5	2.32 ( 0.94 - 5.72 )	2.32 ( 3.56 )
COCCYDYNIA	MUSCULOSKELETAL AND CONNECTIVE TISSUE DISORDERS	5	1.58 ( 0.65 - 3.86 )	1.58 ( 1.02 )
RED BLOOD CELL COUNT ABNORMAL	INVESTIGATIONS	5	2.78 ( 1.12 - 6.89 )	2.78 ( 5.33 )
MYELOPATHY	NERVOUS SYSTEM DISORDERS	5	1.66 ( 0.68 - 4.06 )	1.66 ( 1.26 )
EAR OPERATION	SURGICAL AND MEDICAL PROCEDURES	5	6.81 ( 2.64 - 17.59 )	6.81 ( 21.13 )
INCONTINENCE	RENAL AND URINARY DISORDERS	5	1.02 ( 0.42 - 2.47 )	1.02 ( 0 )
NASAL DRYNESS	RESPIRATORY, THORACIC AND MEDIASTINAL DISORDERS	5	0.7 ( 0.29 - 1.68 )	0.7 ( 0.66 )
BRONCHOSPASM	RESPIRATORY, THORACIC AND MEDIASTINAL DISORDERS	5	0.52 ( 0.21 - 1.26 )	0.52 ( 2.19 )
SARS-COV-2 ANTIBODY TEST NEGATIVE	INVESTIGATIONS	5	13.16 ( 4.78 - 36.22 )	13.16 ( 42.14 )
ATYPICAL MYCOBACTERIAL INFECTION	INFECTIONS AND INFESTATIONS	5	0.84 ( 0.34 - 2.03 )	0.84 ( 0.16 )
SACRAL PAIN	MUSCULOSKELETAL AND CONNECTIVE TISSUE DISORDERS	5	9.87 ( 3.7 - 26.3 )	9.87 ( 31.89 )
METASTATIC NEOPLASM	NEOPLASMS BENIGN, MALIGNANT AND UNSPECIFIED (INCL CYSTS AND POLYPS)	5	0.86 ( 0.35 - 2.08 )	0.86 ( 0.11 )
METASTASES TO LUNG	NEOPLASMS BENIGN, MALIGNANT AND UNSPECIFIED (INCL CYSTS AND POLYPS)	5	0.78 ( 0.32 - 1.9 )	0.78 ( 0.29 )
GINGIVAL BLEEDING	GASTROINTESTINAL DISORDERS	5	0.41 ( 0.17 - 1 )	0.41 ( 4.13 )
MYELODYSPLASTIC SYNDROME	NEOPLASMS BENIGN, MALIGNANT AND UNSPECIFIED (INCL CYSTS AND POLYPS)	5	0.42 ( 0.17 - 1.02 )	0.42 ( 3.92 )
INFLAMMATORY MARKER DECREASED	INVESTIGATIONS	5	9.87 ( 3.7 - 26.3 )	9.87 ( 31.89 )
SQUAMOUS CELL CARCINOMA OF LUNG	NEOPLASMS BENIGN, MALIGNANT AND UNSPECIFIED (INCL CYSTS AND POLYPS)	5	1.37 ( 0.56 - 3.34 )	1.37 ( 0.49 )
NASAL OBSTRUCTION	RESPIRATORY, THORACIC AND MEDIASTINAL DISORDERS	5	3.95 ( 1.57 - 9.9 )	3.95 ( 10.01 )
PURULENT DISCHARGE	INFECTIONS AND INFESTATIONS	5	0.57 ( 0.24 - 1.38 )	0.57 ( 1.59 )
RHEUMATOID ARTHRITIS-ASSOCIATED INTERSTITIAL LUNG DISEASE	RESPIRATORY, THORACIC AND MEDIASTINAL DISORDERS	5	4.11 ( 1.64 - 10.33 )	4.11 ( 10.67 )
VIRAL UPPER RESPIRATORY TRACT INFECTION	INFECTIONS AND INFESTATIONS	5	0.28 ( 0.11 - 0.66 )	0.28 ( 9.45 )
CEREBRAL ISCHAEMIA	NERVOUS SYSTEM DISORDERS	5	1.26 ( 0.52 - 3.06 )	1.26 ( 0.26 )
HYDRONEPHROSIS	RENAL AND URINARY DISORDERS	5	0.83 ( 0.34 - 2.02 )	0.83 ( 0.16 )
SYNOVECTOMY	SURGICAL AND MEDICAL PROCEDURES	5	1.99 ( 0.81 - 4.9 )	1.99 ( 2.36 )
NASAL SEPTUM DEVIATION	RESPIRATORY, THORACIC AND MEDIASTINAL DISORDERS	5	1.01 ( 0.41 - 2.45 )	1.01 ( 0 )
URINARY TRACT DISORDER	RENAL AND URINARY DISORDERS	5	0.95 ( 0.39 - 2.3 )	0.95 ( 0.01 )
BLEPHAROSPASM	EYE DISORDERS	5	0.46 ( 0.19 - 1.12 )	0.46 ( 3.09 )
THERAPY CHANGE	SURGICAL AND MEDICAL PROCEDURES	5	1.21 ( 0.5 - 2.95 )	1.21 ( 0.18 )
BLOOD IRON INCREASED	INVESTIGATIONS	5	5.48 ( 2.15 - 13.98 )	5.48 ( 16.1 )
ARTERIAL THERAPEUTIC PROCEDURE	SURGICAL AND MEDICAL PROCEDURES	5	14.1 ( 5.08 - 39.15 )	14.1 ( 44.84 )
HEAVY MENSTRUAL BLEEDING	REPRODUCTIVE SYSTEM AND BREAST DISORDERS	5	2.04 ( 0.83 - 5 )	2.04 ( 2.5 )
ABDOMINAL WALL ABSCESS	INFECTIONS AND INFESTATIONS	5	5.98 ( 2.34 - 15.32 )	5.98 ( 18.02 )
DISLOCATION OF VERTEBRA	INJURY, POISONING AND PROCEDURAL COMPLICATIONS	5	0.25 ( 0.11 - 0.61 )	0.25 ( 10.95 )
INCISION SITE COMPLICATION	INJURY, POISONING AND PROCEDURAL COMPLICATIONS	5	2.67 ( 1.08 - 6.6 )	2.67 ( 4.88 )
EAR CONGESTION	EAR AND LABYRINTH DISORDERS	5	0.73 ( 0.3 - 1.76 )	0.73 ( 0.51 )
SUBDURAL HAEMATOMA	INJURY, POISONING AND PROCEDURAL COMPLICATIONS	5	1.21 ( 0.5 - 2.95 )	1.21 ( 0.18 )
BRADYKINESIA	NERVOUS SYSTEM DISORDERS	5	2.7 ( 1.09 - 6.69 )	2.7 ( 5.03 )
PHYSIOTHERAPY	SURGICAL AND MEDICAL PROCEDURES	5	6.58 ( 2.55 - 16.96 )	6.58 ( 20.28 )
VAGINAL INFECTION	INFECTIONS AND INFESTATIONS	5	0.45 ( 0.19 - 1.1 )	0.45 ( 3.23 )
NASAL DISORDER	RESPIRATORY, THORACIC AND MEDIASTINAL DISORDERS	5	1.19 ( 0.49 - 2.9 )	1.19 ( 0.15 )
ARTERIAL DISORDER	VASCULAR DISORDERS	5	1.79 ( 0.73 - 4.4 )	1.79 ( 1.68 )
BUTTERFLY RASH	SKIN AND SUBCUTANEOUS TISSUE DISORDERS	5	1.39 ( 0.57 - 3.39 )	1.39 ( 0.53 )
SARCOIDOSIS	IMMUNE SYSTEM DISORDERS	5	0.35 ( 0.15 - 0.84 )	0.35 ( 5.98 )
ROOT CANAL INFECTION	INFECTIONS AND INFESTATIONS	5	2.95 ( 1.19 - 7.31 )	2.95 ( 5.98 )
ADENOCARCINOMA OF COLON	NEOPLASMS BENIGN, MALIGNANT AND UNSPECIFIED (INCL CYSTS AND POLYPS)	5	1.44 ( 0.59 - 3.52 )	1.44 ( 0.65 )
PERITONITIS	INFECTIONS AND INFESTATIONS	5	0.33 ( 0.14 - 0.81 )	0.33 ( 6.56 )
ATRIOVENTRICULAR BLOCK COMPLETE	CARDIAC DISORDERS	4	1.04 ( 0.38 - 2.8 )	1.04 ( 0.01 )
EXTRADURAL ABSCESS	INFECTIONS AND INFESTATIONS	4	1.39 ( 0.51 - 3.75 )	1.39 ( 0.41 )
ANGIOEDEMA	SKIN AND SUBCUTANEOUS TISSUE DISORDERS	4	0.26 ( 0.1 - 0.7 )	0.26 ( 8.2 )
MYOPIA	EYE DISORDERS	4	2.36 ( 0.86 - 6.46 )	2.36 ( 2.95 )
AXILLARY PAIN	GENERAL DISORDERS AND ADMINISTRATION SITE CONDITIONS	4	2.11 ( 0.77 - 5.76 )	2.11 ( 2.21 )
FORMICATION	NERVOUS SYSTEM DISORDERS	4	0.72 ( 0.27 - 1.95 )	0.72 ( 0.41 )
ORAL MUCOSAL ERYTHEMA	GASTROINTESTINAL DISORDERS	4	2.39 ( 0.87 - 6.57 )	2.39 ( 3.06 )
ORAL MUCOSAL EXFOLIATION	GASTROINTESTINAL DISORDERS	4	1.28 ( 0.47 - 3.48 )	1.28 ( 0.24 )
GENERALISED TONIC-CLONIC SEIZURE	NERVOUS SYSTEM DISORDERS	4	1.19 ( 0.44 - 3.21 )	1.19 ( 0.11 )
OPHTHALMIC HERPES SIMPLEX	INFECTIONS AND INFESTATIONS	4	4.16 ( 1.48 - 11.65 )	4.16 ( 8.67 )
LYMPHOCYTE COUNT INCREASED	INVESTIGATIONS	4	1.1 ( 0.41 - 2.96 )	1.1 ( 0.03 )
POLYMYALGIA RHEUMATICA	MUSCULOSKELETAL AND CONNECTIVE TISSUE DISORDERS	4	1.24 ( 0.46 - 3.36 )	1.24 ( 0.18 )
CARDIAC FAILURE CHRONIC	CARDIAC DISORDERS	4	1.86 ( 0.68 - 5.07 )	1.86 ( 1.51 )
END STAGE RENAL DISEASE	RENAL AND URINARY DISORDERS	4	1.66 ( 0.61 - 4.52 )	1.66 ( 1.01 )
CYST REMOVAL	SURGICAL AND MEDICAL PROCEDURES	4	2.39 ( 0.87 - 6.57 )	2.39 ( 3.06 )
CARDIAC FLUTTER	CARDIAC DISORDERS	4	0.8 ( 0.3 - 2.16 )	0.8 ( 0.19 )
TONGUE DISCOLOURATION	GASTROINTESTINAL DISORDERS	4	1.2 ( 0.44 - 3.24 )	1.2 ( 0.13 )
HICCUPS	RESPIRATORY, THORACIC AND MEDIASTINAL DISORDERS	4	1.66 ( 0.61 - 4.52 )	1.66 ( 1.01 )
ELECTROLYTE IMBALANCE	METABOLISM AND NUTRITION DISORDERS	4	0.86 ( 0.32 - 2.31 )	0.86 ( 0.09 )
SUTURE RELATED COMPLICATION	INJURY, POISONING AND PROCEDURAL COMPLICATIONS	4	1.9 ( 0.7 - 5.19 )	1.9 ( 1.63 )
VASCULAR OCCLUSION	VASCULAR DISORDERS	4	1.37 ( 0.51 - 3.72 )	1.37 ( 0.39 )
PETECHIAE	SKIN AND SUBCUTANEOUS TISSUE DISORDERS	4	0.52 ( 0.2 - 1.41 )	0.52 ( 1.7 )
APATHY	PSYCHIATRIC DISORDERS	4	0.94 ( 0.35 - 2.53 )	0.94 ( 0.01 )
OESOPHAGEAL PAIN	GASTROINTESTINAL DISORDERS	4	1.61 ( 0.59 - 4.38 )	1.61 ( 0.89 )
OESOPHAGEAL CANDIDIASIS	INFECTIONS AND INFESTATIONS	4	0.92 ( 0.34 - 2.47 )	0.92 ( 0.03 )
RECTAL PROLAPSE	GASTROINTESTINAL DISORDERS	4	1.28 ( 0.47 - 3.48 )	1.28 ( 0.24 )
INDURATION	GENERAL DISORDERS AND ADMINISTRATION SITE CONDITIONS	4	1.05 ( 0.39 - 2.82 )	1.05 ( 0.01 )
JAW FRACTURE	INJURY, POISONING AND PROCEDURAL COMPLICATIONS	4	1.16 ( 0.43 - 3.14 )	1.16 ( 0.09 )
PROCEDURAL FAILURE	GENERAL DISORDERS AND ADMINISTRATION SITE CONDITIONS	4	19.74 ( 5.94 - 65.57 )	19.74 ( 47.45 )
GINGIVAL RECESSION	GASTROINTESTINAL DISORDERS	4	1.4 ( 0.52 - 3.79 )	1.4 ( 0.44 )
BRONCHIAL DISORDER	RESPIRATORY, THORACIC AND MEDIASTINAL DISORDERS	4	0.9 ( 0.33 - 2.43 )	0.9 ( 0.04 )
UTERINE PROLAPSE	REPRODUCTIVE SYSTEM AND BREAST DISORDERS	4	0.99 ( 0.37 - 2.66 )	0.99 ( 0 )
EYE LASER SURGERY	SURGICAL AND MEDICAL PROCEDURES	4	5.64 ( 1.98 - 16.08 )	5.64 ( 13.36 )
THYROID FUNCTION TEST ABNORMAL	INVESTIGATIONS	4	0.84 ( 0.31 - 2.25 )	0.84 ( 0.13 )
FEAR OF DISEASE	PSYCHIATRIC DISORDERS	4	1.79 ( 0.66 - 4.89 )	1.79 ( 1.35 )
RETINAL VASCULAR OCCLUSION	EYE DISORDERS	4	6.32 ( 2.2 - 18.15 )	6.32 ( 15.43 )
ILEUS	GASTROINTESTINAL DISORDERS	4	0.7 ( 0.26 - 1.88 )	0.7 ( 0.51 )
AORTIC VALVE REPLACEMENT	SURGICAL AND MEDICAL PROCEDURES	4	2.11 ( 0.77 - 5.76 )	2.11 ( 2.21 )
VENOUS OPERATION	SURGICAL AND MEDICAL PROCEDURES	4	4.94 ( 1.75 - 13.96 )	4.94 ( 11.16 )
PANCREATIC MASS	GASTROINTESTINAL DISORDERS	4	2.68 ( 0.97 - 7.37 )	2.68 ( 3.93 )
WHITE BLOOD CELL DISORDER	BLOOD AND LYMPHATIC SYSTEM DISORDERS	4	1.35 ( 0.5 - 3.66 )	1.35 ( 0.35 )
TONGUE BLISTERING	GASTROINTESTINAL DISORDERS	4	1.63 ( 0.6 - 4.43 )	1.63 ( 0.93 )
FOREARM FRACTURE	INJURY, POISONING AND PROCEDURAL COMPLICATIONS	4	2.55 ( 0.93 - 7 )	2.55 ( 3.53 )
ALLERGIC COUGH	RESPIRATORY, THORACIC AND MEDIASTINAL DISORDERS	4	1.42 ( 0.52 - 3.86 )	1.42 ( 0.49 )
DYSPHEMIA	PSYCHIATRIC DISORDERS	4	2.55 ( 0.93 - 7 )	2.55 ( 3.53 )
EXFOLIATIVE RASH	SKIN AND SUBCUTANEOUS TISSUE DISORDERS	4	1.03 ( 0.38 - 2.77 )	1.03 ( 0 )
DIABETES MELLITUS INADEQUATE CONTROL	METABOLISM AND NUTRITION DISORDERS	4	0.41 ( 0.15 - 1.1 )	0.41 ( 3.38 )
ANAL ABSCESS	INFECTIONS AND INFESTATIONS	4	0.69 ( 0.26 - 1.86 )	0.69 ( 0.54 )
PROCTALGIA	GASTROINTESTINAL DISORDERS	4	1.58 ( 0.58 - 4.29 )	1.58 ( 0.82 )
PSYCHIATRIC SYMPTOM	PSYCHIATRIC DISORDERS	4	0.94 ( 0.35 - 2.53 )	0.94 ( 0.01 )
REFLUX GASTRITIS	GASTROINTESTINAL DISORDERS	4	2.87 ( 1.04 - 7.92 )	2.87 ( 4.55 )
POISONING	INJURY, POISONING AND PROCEDURAL COMPLICATIONS	4	1.31 ( 0.48 - 3.53 )	1.31 ( 0.28 )
BLOOD POTASSIUM ABNORMAL	INVESTIGATIONS	4	2.19 ( 0.8 - 6 )	2.19 ( 2.46 )
ASTHENOPIA	EYE DISORDERS	4	1.1 ( 0.41 - 2.98 )	1.1 ( 0.04 )
POSTOPERATIVE ADHESION	INJURY, POISONING AND PROCEDURAL COMPLICATIONS	4	2.29 ( 0.84 - 6.27 )	2.29 ( 2.74 )
UPPER RESPIRATORY TRACT INFLAMMATION	RESPIRATORY, THORACIC AND MEDIASTINAL DISORDERS	4	1.95 ( 0.71 - 5.32 )	1.95 ( 1.76 )
EMERGENCY CARE	SURGICAL AND MEDICAL PROCEDURES	4	4.16 ( 1.48 - 11.65 )	4.16 ( 8.67 )
PERIPHERAL NERVE DECOMPRESSION	SURGICAL AND MEDICAL PROCEDURES	4	8.77 ( 2.97 - 25.93 )	8.77 ( 22.54 )
EOSINOPHIL COUNT DECREASED	INVESTIGATIONS	4	6.32 ( 2.2 - 18.15 )	6.32 ( 15.43 )
LEFT VENTRICULAR DYSFUNCTION	CARDIAC DISORDERS	4	1.04 ( 0.38 - 2.8 )	1.04 ( 0.01 )
MONOCYTE COUNT INCREASED	INVESTIGATIONS	4	0.83 ( 0.31 - 2.23 )	0.83 ( 0.14 )
NOCTURIA	RENAL AND URINARY DISORDERS	4	0.81 ( 0.3 - 2.19 )	0.81 ( 0.17 )
DRUG RESISTANCE	GENERAL DISORDERS AND ADMINISTRATION SITE CONDITIONS	4	0.5 ( 0.18 - 1.33 )	0.5 ( 2.03 )
PHARYNGEAL MASS	RESPIRATORY, THORACIC AND MEDIASTINAL DISORDERS	4	1.97 ( 0.72 - 5.39 )	1.97 ( 1.83 )
WEIGHT GAIN POOR	METABOLISM AND NUTRITION DISORDERS	4	6.58 ( 2.28 - 18.97 )	6.58 ( 16.23 )
DISEASE PROGRESSION	GENERAL DISORDERS AND ADMINISTRATION SITE CONDITIONS	4	0.16 ( 0.06 - 0.43 )	0.16 ( 17.65 )
DYSCHEZIA	GASTROINTESTINAL DISORDERS	4	3.16 ( 1.14 - 8.75 )	3.16 ( 5.46 )
OTITIS MEDIA	INFECTIONS AND INFESTATIONS	4	0.88 ( 0.33 - 2.38 )	0.88 ( 0.06 )
AGRANULOCYTOSIS	BLOOD AND LYMPHATIC SYSTEM DISORDERS	4	0.32 ( 0.12 - 0.84 )	0.32 ( 5.9 )
LYMPHOPROLIFERATIVE DISORDER	NEOPLASMS BENIGN, MALIGNANT AND UNSPECIFIED (INCL CYSTS AND POLYPS)	4	0.14 ( 0.05 - 0.38 )	0.14 ( 20.24 )
CHRONIC LYMPHOCYTIC LEUKAEMIA	NEOPLASMS BENIGN, MALIGNANT AND UNSPECIFIED (INCL CYSTS AND POLYPS)	4	0.86 ( 0.32 - 2.31 )	0.86 ( 0.09 )
INFLAMMATORY BOWEL DISEASE	GASTROINTESTINAL DISORDERS	4	1.53 ( 0.56 - 4.16 )	1.53 ( 0.71 )
ABSCESS ORAL	INFECTIONS AND INFESTATIONS	4	1.07 ( 0.4 - 2.9 )	1.07 ( 0.02 )
DRUG EFFECT LESS THAN EXPECTED	GENERAL DISORDERS AND ADMINISTRATION SITE CONDITIONS	4	0.76 ( 0.28 - 2.05 )	0.76 ( 0.29 )
MELANOMA RECURRENT	NEOPLASMS BENIGN, MALIGNANT AND UNSPECIFIED (INCL CYSTS AND POLYPS)	4	13.16 ( 4.24 - 40.81 )	13.16 ( 33.71 )
MULTIMORBIDITY	GENERAL DISORDERS AND ADMINISTRATION SITE CONDITIONS	4	7.52 ( 2.58 - 21.91 )	7.52 ( 19 )
CARDIAC FIBRILLATION	CARDIAC DISORDERS	4	3.04 ( 1.1 - 8.4 )	3.04 ( 5.08 )
PRODUCT LOT NUMBER ISSUE	PRODUCT ISSUES	4	3.95 ( 1.41 - 11.04 )	3.95 ( 8.01 )
WOUND INFECTION STAPHYLOCOCCAL	INFECTIONS AND INFESTATIONS	4	0.68 ( 0.25 - 1.83 )	0.68 ( 0.59 )
VASCULAR CALCIFICATION	VASCULAR DISORDERS	4	3.95 ( 1.41 - 11.04 )	3.95 ( 8.01 )
PSYCHOTIC DISORDER	PSYCHIATRIC DISORDERS	4	0.86 ( 0.32 - 2.31 )	0.86 ( 0.09 )
BLISTER RUPTURE	SKIN AND SUBCUTANEOUS TISSUE DISORDERS	4	2.98 ( 1.08 - 8.23 )	2.98 ( 4.89 )
GINGIVAL OPERATION	SURGICAL AND MEDICAL PROCEDURES	4	9.29 ( 3.13 - 27.61 )	9.29 ( 23.95 )
OPTIC NEURITIS	NERVOUS SYSTEM DISORDERS	4	0.54 ( 0.2 - 1.44 )	0.54 ( 1.57 )
HERPES ZOSTER OTICUS	INFECTIONS AND INFESTATIONS	4	2.87 ( 1.04 - 7.92 )	2.87 ( 4.55 )
CORONARY ARTERY STENOSIS	CARDIAC DISORDERS	4	0.67 ( 0.25 - 1.79 )	0.67 ( 0.66 )
BENIGN NEOPLASM OF THYROID GLAND	NEOPLASMS BENIGN, MALIGNANT AND UNSPECIFIED (INCL CYSTS AND POLYPS)	4	1.63 ( 0.6 - 4.43 )	1.63 ( 0.93 )
BREAST SWELLING	REPRODUCTIVE SYSTEM AND BREAST DISORDERS	4	2.08 ( 0.76 - 5.68 )	2.08 ( 2.13 )
PARATHYROID GLAND OPERATION	SURGICAL AND MEDICAL PROCEDURES	4	13.16 ( 4.24 - 40.81 )	13.16 ( 33.71 )
CORNEAL ABRASION	INJURY, POISONING AND PROCEDURAL COMPLICATIONS	4	2.47 ( 0.9 - 6.78 )	2.47 ( 3.29 )
INTRADUCTAL PAPILLOMA OF BREAST	NEOPLASMS BENIGN, MALIGNANT AND UNSPECIFIED (INCL CYSTS AND POLYPS)	4	9.29 ( 3.13 - 27.61 )	9.29 ( 23.95 )
ADRENAL NEOPLASM	NEOPLASMS BENIGN, MALIGNANT AND UNSPECIFIED (INCL CYSTS AND POLYPS)	4	5.64 ( 1.98 - 16.08 )	5.64 ( 13.36 )
SCLERODERMA	MUSCULOSKELETAL AND CONNECTIVE TISSUE DISORDERS	4	0.83 ( 0.31 - 2.24 )	0.83 ( 0.13 )
EXERCISE TOLERANCE DECREASED	GENERAL DISORDERS AND ADMINISTRATION SITE CONDITIONS	4	0.93 ( 0.34 - 2.5 )	0.93 ( 0.02 )
DRUG DEPENDENCE	PSYCHIATRIC DISORDERS	4	0.25 ( 0.09 - 0.67 )	0.25 ( 9 )
WEIGHT LOSS POOR	METABOLISM AND NUTRITION DISORDERS	4	1.42 ( 0.52 - 3.86 )	1.42 ( 0.49 )
HYPOTONIA	NERVOUS SYSTEM DISORDERS	4	1.28 ( 0.47 - 3.48 )	1.28 ( 0.24 )
ATRIAL SEPTAL DEFECT	CONGENITAL, FAMILIAL AND GENETIC DISORDERS	4	1.7 ( 0.62 - 4.62 )	1.7 ( 1.1 )
HYPERACUSIS	EAR AND LABYRINTH DISORDERS	4	3.04 ( 1.1 - 8.4 )	3.04 ( 5.08 )
LIPASE INCREASED	INVESTIGATIONS	4	2.43 ( 0.89 - 6.67 )	2.43 ( 3.17 )
GASTRIC BANDING	SURGICAL AND MEDICAL PROCEDURES	4	7.9 ( 2.7 - 23.1 )	7.9 ( 20.08 )
OBSTRUCTIVE AIRWAYS DISORDER	RESPIRATORY, THORACIC AND MEDIASTINAL DISORDERS	4	0.79 ( 0.29 - 2.12 )	0.79 ( 0.22 )
SUFFOCATION FEELING	RESPIRATORY, THORACIC AND MEDIASTINAL DISORDERS	4	2.13 ( 0.78 - 5.84 )	2.13 ( 2.29 )
NAIL DISCOLOURATION	SKIN AND SUBCUTANEOUS TISSUE DISORDERS	4	0.82 ( 0.3 - 2.2 )	0.82 ( 0.16 )
PREGNANCY	PREGNANCY, PUERPERIUM AND PERINATAL CONDITIONS	4	0.15 ( 0.06 - 0.41 )	0.15 ( 18.46 )
LACTIC ACIDOSIS	METABOLISM AND NUTRITION DISORDERS	4	1.42 ( 0.52 - 3.86 )	1.42 ( 0.49 )
GENITAL PAIN	REPRODUCTIVE SYSTEM AND BREAST DISORDERS	4	4.27 ( 1.52 - 11.98 )	4.27 ( 9.03 )
INTESTINAL ISCHAEMIA	GASTROINTESTINAL DISORDERS	4	0.79 ( 0.29 - 2.11 )	0.79 ( 0.23 )
URINE ABNORMALITY	RENAL AND URINARY DISORDERS	4	0.83 ( 0.31 - 2.24 )	0.83 ( 0.13 )
OVARIAN NEOPLASM	NEOPLASMS BENIGN, MALIGNANT AND UNSPECIFIED (INCL CYSTS AND POLYPS)	4	1.07 ( 0.4 - 2.88 )	1.07 ( 0.02 )
TRICHORRHEXIS	SKIN AND SUBCUTANEOUS TISSUE DISORDERS	4	1.63 ( 0.6 - 4.43 )	1.63 ( 0.93 )
ALLERGY TO VACCINE	IMMUNE SYSTEM DISORDERS	4	3.36 ( 1.21 - 9.33 )	3.36 ( 6.11 )
COSTOCHONDRITIS	MUSCULOSKELETAL AND CONNECTIVE TISSUE DISORDERS	4	0.99 ( 0.37 - 2.68 )	0.99 ( 0 )
RESPIRATORY SYMPTOM	RESPIRATORY, THORACIC AND MEDIASTINAL DISORDERS	4	2 ( 0.73 - 5.46 )	2 ( 1.9 )
HERNIA REPAIR	SURGICAL AND MEDICAL PROCEDURES	4	0.75 ( 0.28 - 2.01 )	0.75 ( 0.33 )
PULPITIS DENTAL	INFECTIONS AND INFESTATIONS	4	1.65 ( 0.61 - 4.47 )	1.65 ( 0.97 )
BREAST CYST	REPRODUCTIVE SYSTEM AND BREAST DISORDERS	4	0.88 ( 0.33 - 2.38 )	0.88 ( 0.06 )
METASTASES TO BONE	NEOPLASMS BENIGN, MALIGNANT AND UNSPECIFIED (INCL CYSTS AND POLYPS)	4	0.69 ( 0.26 - 1.85 )	0.69 ( 0.55 )
PARATHYROIDECTOMY	SURGICAL AND MEDICAL PROCEDURES	4	8.77 ( 2.97 - 25.93 )	8.77 ( 22.54 )
SWELLING OF EYELID	EYE DISORDERS	4	1.58 ( 0.58 - 4.29 )	1.58 ( 0.82 )
HIP DEFORMITY	MUSCULOSKELETAL AND CONNECTIVE TISSUE DISORDERS	4	2.72 ( 0.99 - 7.5 )	2.72 ( 4.08 )
BLOOD ALBUMIN DECREASED	INVESTIGATIONS	4	0.62 ( 0.23 - 1.66 )	0.62 ( 0.92 )
BARRETT'S OESOPHAGUS	GASTROINTESTINAL DISORDERS	4	1.24 ( 0.46 - 3.36 )	1.24 ( 0.18 )
ANEURYSM RUPTURED	VASCULAR DISORDERS	4	3.22 ( 1.16 - 8.93 )	3.22 ( 5.67 )
LIP PAIN	GASTROINTESTINAL DISORDERS	4	1.63 ( 0.6 - 4.43 )	1.63 ( 0.93 )
DIAPHRAGMATIC PARALYSIS	RESPIRATORY, THORACIC AND MEDIASTINAL DISORDERS	4	3.95 ( 1.41 - 11.04 )	3.95 ( 8.01 )
SPINAL DECOMPRESSION	SURGICAL AND MEDICAL PROCEDURES	4	2.36 ( 0.86 - 6.46 )	2.36 ( 2.95 )
SUPERINFECTION BACTERIAL	INFECTIONS AND INFESTATIONS	4	4.79 ( 1.7 - 13.51 )	4.79 ( 10.68 )
CERVICAL SPINAL STENOSIS	MUSCULOSKELETAL AND CONNECTIVE TISSUE DISORDERS	4	1.01 ( 0.37 - 2.71 )	1.01 ( 0 )
ORTHOSIS USER	SOCIAL CIRCUMSTANCES	4	3.59 ( 1.29 - 9.99 )	3.59 ( 6.85 )
INTRACRANIAL MASS	NERVOUS SYSTEM DISORDERS	4	4.51 ( 1.6 - 12.7 )	4.51 ( 9.81 )
TREATMENT NONCOMPLIANCE	GENERAL DISORDERS AND ADMINISTRATION SITE CONDITIONS	4	0.18 ( 0.07 - 0.48 )	0.18 ( 14.97 )
VASCULAR OPERATION	SURGICAL AND MEDICAL PROCEDURES	4	5.45 ( 1.91 - 15.49 )	5.45 ( 12.76 )
AORTIC OCCLUSION	VASCULAR DISORDERS	4	5.64 ( 1.98 - 16.08 )	5.64 ( 13.36 )
SACROILIAC FUSION	SURGICAL AND MEDICAL PROCEDURES	4	52.65 ( 11.78 - 235.24 )	52.64 ( 86.85 )
TONGUE INJURY	INJURY, POISONING AND PROCEDURAL COMPLICATIONS	4	4.05 ( 1.45 - 11.33 )	4.05 ( 8.33 )
HODGKIN'S DISEASE	NEOPLASMS BENIGN, MALIGNANT AND UNSPECIFIED (INCL CYSTS AND POLYPS)	4	0.33 ( 0.12 - 0.89 )	0.33 ( 5.34 )
ACUTE FEBRILE NEUTROPHILIC DERMATOSIS	SKIN AND SUBCUTANEOUS TISSUE DISORDERS	4	1.79 ( 0.66 - 4.89 )	1.79 ( 1.35 )
UTERINE POLYP	REPRODUCTIVE SYSTEM AND BREAST DISORDERS	4	0.95 ( 0.35 - 2.55 )	0.95 ( 0.01 )
EXPOSURE DURING PREGNANCY	INJURY, POISONING AND PROCEDURAL COMPLICATIONS	4	0.06 ( 0.02 - 0.16 )	0.06 ( 58.86 )
NASAL PRURITUS	RESPIRATORY, THORACIC AND MEDIASTINAL DISORDERS	4	3.85 ( 1.38 - 10.75 )	3.85 ( 7.7 )
ABDOMINOPLASTY	SURGICAL AND MEDICAL PROCEDURES	4	4.39 ( 1.56 - 12.33 )	4.39 ( 9.41 )
ENDOCARDITIS	INFECTIONS AND INFESTATIONS	4	0.52 ( 0.19 - 1.39 )	0.52 ( 1.75 )
POST-TRAUMATIC STRESS DISORDER	PSYCHIATRIC DISORDERS	4	0.97 ( 0.36 - 2.63 )	0.97 ( 0 )
STOMA CREATION	SURGICAL AND MEDICAL PROCEDURES	4	17.55 ( 5.4 - 56.99 )	17.55 ( 43.21 )
CORNEAL PERFORATION	EYE DISORDERS	4	2.29 ( 0.84 - 6.27 )	2.29 ( 2.74 )
BIPOLAR DISORDER	PSYCHIATRIC DISORDERS	4	1.02 ( 0.38 - 2.75 )	1.02 ( 0 )
PNEUMONIA LEGIONELLA	INFECTIONS AND INFESTATIONS	4	0.56 ( 0.21 - 1.51 )	0.56 ( 1.33 )
DIPLEGIA	NERVOUS SYSTEM DISORDERS	4	2.36 ( 0.86 - 6.46 )	2.36 ( 2.95 )
CARDIAC FAILURE ACUTE	CARDIAC DISORDERS	4	1.07 ( 0.4 - 2.9 )	1.07 ( 0.02 )
SIALOADENITIS	INFECTIONS AND INFESTATIONS	4	1.48 ( 0.54 - 4 )	1.48 ( 0.59 )
IDIOPATHIC INTRACRANIAL HYPERTENSION	NERVOUS SYSTEM DISORDERS	4	26.32 ( 7.43 - 93.28 )	26.32 ( 58.46 )
INTUSSUSCEPTION	GASTROINTESTINAL DISORDERS	4	9.87 ( 3.3 - 29.53 )	9.87 ( 25.51 )
ABDOMINAL INJURY	INJURY, POISONING AND PROCEDURAL COMPLICATIONS	4	7.9 ( 2.7 - 23.1 )	7.9 ( 20.08 )
LUNG OPERATION	SURGICAL AND MEDICAL PROCEDURES	4	2.55 ( 0.93 - 7 )	2.55 ( 3.53 )
SPINAL CORD INFECTION	INFECTIONS AND INFESTATIONS	4	1.95 ( 0.71 - 5.32 )	1.95 ( 1.76 )
SMALL INTESTINAL RESECTION	SURGICAL AND MEDICAL PROCEDURES	4	12.15 ( 3.96 - 37.26 )	12.15 ( 31.29 )
TUBERCULIN TEST POSITIVE	INVESTIGATIONS	4	0.17 ( 0.07 - 0.47 )	0.17 ( 15.51 )
MENINGITIS BACTERIAL	INFECTIONS AND INFESTATIONS	4	1.65 ( 0.61 - 4.47 )	1.65 ( 0.97 )
DEFORMITY	GENERAL DISORDERS AND ADMINISTRATION SITE CONDITIONS	4	0.19 ( 0.07 - 0.52 )	0.19 ( 13.43 )
LOCALISED OEDEMA	GENERAL DISORDERS AND ADMINISTRATION SITE CONDITIONS	4	0.97 ( 0.36 - 2.63 )	0.97 ( 0 )
MENINGITIS VIRAL	INFECTIONS AND INFESTATIONS	4	1.56 ( 0.58 - 4.25 )	1.56 ( 0.78 )
ASCITES	GASTROINTESTINAL DISORDERS	4	0.31 ( 0.11 - 0.82 )	0.31 ( 6.22 )
LUPUS-LIKE SYNDROME	MUSCULOSKELETAL AND CONNECTIVE TISSUE DISORDERS	4	0.13 ( 0.05 - 0.34 )	0.13 ( 24.12 )
PANIC DISORDER	PSYCHIATRIC DISORDERS	4	1.68 ( 0.62 - 4.57 )	1.68 ( 1.06 )
PHARYNGEAL INFLAMMATION	RESPIRATORY, THORACIC AND MEDIASTINAL DISORDERS	4	1.7 ( 0.62 - 4.62 )	1.7 ( 1.1 )
LEUKOCYTOSIS	BLOOD AND LYMPHATIC SYSTEM DISORDERS	4	0.44 ( 0.16 - 1.17 )	0.44 ( 2.86 )
TOXIC ENCEPHALOPATHY	NERVOUS SYSTEM DISORDERS	4	4.79 ( 1.7 - 13.51 )	4.79 ( 10.68 )
GALLBLADDER HYPOFUNCTION	HEPATOBILIARY DISORDERS	4	11.28 ( 3.71 - 34.27 )	11.28 ( 29.15 )
HUMAN PAPILLOMA VIRUS TEST POSITIVE	INVESTIGATIONS	4	4.94 ( 1.75 - 13.96 )	4.94 ( 11.16 )
BLOOD CREATININE DECREASED	INVESTIGATIONS	4	1.26 ( 0.47 - 3.42 )	1.26 ( 0.21 )
LARGE INTESTINAL ULCER	GASTROINTESTINAL DISORDERS	4	1.39 ( 0.51 - 3.75 )	1.39 ( 0.41 )
GLIOBLASTOMA	NEOPLASMS BENIGN, MALIGNANT AND UNSPECIFIED (INCL CYSTS AND POLYPS)	4	2.22 ( 0.81 - 6.09 )	2.22 ( 2.55 )
HYPERCALCAEMIA	METABOLISM AND NUTRITION DISORDERS	4	0.19 ( 0.07 - 0.52 )	0.19 ( 13.33 )
HEAT ILLNESS	INJURY, POISONING AND PROCEDURAL COMPLICATIONS	4	7.9 ( 2.7 - 23.1 )	7.9 ( 20.08 )
PILONIDAL DISEASE	INFECTIONS AND INFESTATIONS	4	31.59 ( 8.48 - 117.64 )	31.59 ( 65.82 )
BOWEN'S DISEASE	NEOPLASMS BENIGN, MALIGNANT AND UNSPECIFIED (INCL CYSTS AND POLYPS)	4	1.29 ( 0.48 - 3.5 )	1.29 ( 0.26 )
PERIPHERAL ISCHAEMIA	VASCULAR DISORDERS	4	1.07 ( 0.4 - 2.88 )	1.07 ( 0.02 )
BONE TUBERCULOSIS	INFECTIONS AND INFESTATIONS	4	2.72 ( 0.99 - 7.5 )	2.72 ( 4.08 )
HAIR TEXTURE ABNORMAL	SKIN AND SUBCUTANEOUS TISSUE DISORDERS	4	0.77 ( 0.29 - 2.07 )	0.77 ( 0.27 )
BREAST CONSERVING SURGERY	SURGICAL AND MEDICAL PROCEDURES	4	5.45 ( 1.91 - 15.49 )	5.45 ( 12.76 )
MAMMOGRAM ABNORMAL	INVESTIGATIONS	4	1.72 ( 0.63 - 4.67 )	1.72 ( 1.15 )
FUNGAL FOOT INFECTION	INFECTIONS AND INFESTATIONS	4	4.16 ( 1.48 - 11.65 )	4.16 ( 8.67 )
ORTHOPAEDIC PROCEDURE	SURGICAL AND MEDICAL PROCEDURES	4	4.65 ( 1.65 - 13.09 )	4.65 ( 10.24 )
PIGMENTATION DISORDER	SKIN AND SUBCUTANEOUS TISSUE DISORDERS	4	0.8 ( 0.3 - 2.15 )	0.8 ( 0.2 )
DEFAECATION URGENCY	GASTROINTESTINAL DISORDERS	4	1.65 ( 0.61 - 4.47 )	1.65 ( 0.97 )
HEPATIC CANCER METASTATIC	NEOPLASMS BENIGN, MALIGNANT AND UNSPECIFIED (INCL CYSTS AND POLYPS)	4	3.04 ( 1.1 - 8.4 )	3.04 ( 5.08 )
EPICONDYLITIS	INJURY, POISONING AND PROCEDURAL COMPLICATIONS	4	0.81 ( 0.3 - 2.18 )	0.81 ( 0.17 )
LUMBAR HERNIA	GASTROINTESTINAL DISORDERS	4	6.58 ( 2.28 - 18.97 )	6.58 ( 16.23 )
INJECTION SITE ERYTHEMA	GENERAL DISORDERS AND ADMINISTRATION SITE CONDITIONS	4	0.01 ( 0 - 0.01 )	0.01 ( 757.02 )
LYMPHOCYTE COUNT ABNORMAL	INVESTIGATIONS	4	5.09 ( 1.8 - 14.43 )	5.09 ( 11.66 )
DYSLIPIDAEMIA	METABOLISM AND NUTRITION DISORDERS	4	0.78 ( 0.29 - 2.09 )	0.78 ( 0.25 )
THROMBOCYTOSIS	BLOOD AND LYMPHATIC SYSTEM DISORDERS	4	1.12 ( 0.41 - 3.03 )	1.12 ( 0.05 )
CYSTOCELE	REPRODUCTIVE SYSTEM AND BREAST DISORDERS	4	2.39 ( 0.87 - 6.57 )	2.39 ( 3.06 )
PARAESTHESIA ORAL	GASTROINTESTINAL DISORDERS	4	0.38 ( 0.14 - 1.02 )	0.38 ( 3.95 )
COLORECTAL CANCER	NEOPLASMS BENIGN, MALIGNANT AND UNSPECIFIED (INCL CYSTS AND POLYPS)	4	2.43 ( 0.89 - 6.67 )	2.43 ( 3.17 )
RETINAL ARTERY OCCLUSION	EYE DISORDERS	4	2.98 ( 1.08 - 8.23 )	2.98 ( 4.89 )
FACET JOINT SYNDROME	MUSCULOSKELETAL AND CONNECTIVE TISSUE DISORDERS	4	0.16 ( 0.06 - 0.43 )	0.16 ( 17.6 )
GASTRIC CYST	GASTROINTESTINAL DISORDERS	4	7.52 ( 2.58 - 21.91 )	7.52 ( 19 )
GENERAL PHYSICAL CONDITION	INVESTIGATIONS	4	31.59 ( 8.48 - 117.64 )	31.59 ( 65.82 )
TOOTH INJURY	INJURY, POISONING AND PROCEDURAL COMPLICATIONS	4	1.18 ( 0.44 - 3.19 )	1.18 ( 0.11 )
VARICELLA ZOSTER VIRUS INFECTION	INFECTIONS AND INFESTATIONS	4	1.88 ( 0.69 - 5.13 )	1.88 ( 1.57 )
COELIAC DISEASE	GASTROINTESTINAL DISORDERS	4	0.15 ( 0.06 - 0.41 )	0.15 ( 18.36 )
BLOOD ALBUMIN INCREASED	INVESTIGATIONS	4	7.18 ( 2.47 - 20.83 )	7.18 ( 18 )
ATTENTION DEFICIT HYPERACTIVITY DISORDER	PSYCHIATRIC DISORDERS	4	4.94 ( 1.75 - 13.96 )	4.94 ( 11.16 )
MENINGITIS ASEPTIC	INFECTIONS AND INFESTATIONS	4	1.4 ( 0.52 - 3.79 )	1.4 ( 0.44 )
TRANSAMINASES INCREASED	INVESTIGATIONS	4	0.18 ( 0.07 - 0.48 )	0.18 ( 14.92 )
PRODUCT PRESCRIBING ERROR	INJURY, POISONING AND PROCEDURAL COMPLICATIONS	4	0.25 ( 0.09 - 0.68 )	0.25 ( 8.79 )
BRONCHIAL OBSTRUCTION	RESPIRATORY, THORACIC AND MEDIASTINAL DISORDERS	4	4.16 ( 1.48 - 11.65 )	4.16 ( 8.67 )
BREAST CANCER METASTATIC	NEOPLASMS BENIGN, MALIGNANT AND UNSPECIFIED (INCL CYSTS AND POLYPS)	3	0.62 ( 0.2 - 1.93 )	0.62 ( 0.7 )
TUNNEL VISION	NERVOUS SYSTEM DISORDERS	3	3.29 ( 1.01 - 10.68 )	3.29 ( 4.41 )
VULVOVAGINAL BURNING SENSATION	REPRODUCTIVE SYSTEM AND BREAST DISORDERS	3	1.23 ( 0.39 - 3.89 )	1.23 ( 0.13 )
INFECTED SKIN ULCER	INFECTIONS AND INFESTATIONS	3	0.39 ( 0.12 - 1.2 )	0.39 ( 2.9 )
VASODILATATION	VASCULAR DISORDERS	3	1.25 ( 0.4 - 3.94 )	1.25 ( 0.14 )
ANAEMIA POSTOPERATIVE	INJURY, POISONING AND PROCEDURAL COMPLICATIONS	3	1.91 ( 0.6 - 6.09 )	1.91 ( 1.24 )
GASTROINTESTINAL TRACT IRRITATION	GASTROINTESTINAL DISORDERS	3	2.47 ( 0.77 - 7.92 )	2.47 ( 2.46 )
PALATAL DISORDER	GASTROINTESTINAL DISORDERS	3	4.94 ( 1.49 - 16.39 )	4.94 ( 8.37 )
OVARIAN DISORDER	REPRODUCTIVE SYSTEM AND BREAST DISORDERS	3	1.82 ( 0.57 - 5.8 )	1.82 ( 1.06 )
PULMONARY GRANULOMA	RESPIRATORY, THORACIC AND MEDIASTINAL DISORDERS	3	0.84 ( 0.27 - 2.64 )	0.84 ( 0.09 )
INJURY CORNEAL	INJURY, POISONING AND PROCEDURAL COMPLICATIONS	3	3.38 ( 1.04 - 11 )	3.38 ( 4.64 )
MEAN CELL HAEMOGLOBIN CONCENTRATION INCREASED	INVESTIGATIONS	3	11.85 ( 3.26 - 43.04 )	11.84 ( 22.91 )
MEAN CELL VOLUME INCREASED	INVESTIGATIONS	3	0.96 ( 0.31 - 3.03 )	0.96 ( 0 )
ABNORMAL WEIGHT GAIN	METABOLISM AND NUTRITION DISORDERS	3	3.48 ( 1.07 - 11.34 )	3.48 ( 4.88 )
SKIN REACTION	SKIN AND SUBCUTANEOUS TISSUE DISORDERS	3	0.16 ( 0.05 - 0.48 )	0.16 ( 13.76 )
URETERAL STENT INSERTION	SURGICAL AND MEDICAL PROCEDURES	3	9.11 ( 2.6 - 31.98 )	9.11 ( 17.6 )
RESPIRATION ABNORMAL	RESPIRATORY, THORACIC AND MEDIASTINAL DISORDERS	3	1.12 ( 0.35 - 3.52 )	1.12 ( 0.04 )
SKIN STRIAE	SKIN AND SUBCUTANEOUS TISSUE DISORDERS	3	2.23 ( 0.7 - 7.15 )	2.23 ( 1.94 )
INTESTINAL ULCER	GASTROINTESTINAL DISORDERS	3	1.97 ( 0.62 - 6.29 )	1.97 ( 1.37 )
PLEURAL THICKENING	RESPIRATORY, THORACIC AND MEDIASTINAL DISORDERS	3	0.8 ( 0.26 - 2.51 )	0.8 ( 0.15 )
POSTOPERATIVE ABSCESS	INFECTIONS AND INFESTATIONS	3	1.94 ( 0.61 - 6.19 )	1.94 ( 1.31 )
ABDOMINAL ADHESIONS	GASTROINTESTINAL DISORDERS	3	0.64 ( 0.21 - 2.01 )	0.64 ( 0.58 )
BONE MARROW FAILURE	BLOOD AND LYMPHATIC SYSTEM DISORDERS	3	0.2 ( 0.06 - 0.62 )	0.2 ( 9.69 )
CORONAVIRUS TEST POSITIVE	INVESTIGATIONS	3	3.38 ( 1.04 - 11 )	3.38 ( 4.64 )
AORTIC VALVE INCOMPETENCE	CARDIAC DISORDERS	3	0.69 ( 0.22 - 2.16 )	0.69 ( 0.42 )
DIASTOLIC DYSFUNCTION	CARDIAC DISORDERS	3	1.2 ( 0.38 - 3.77 )	1.2 ( 0.09 )
MEAN CELL HAEMOGLOBIN INCREASED	INVESTIGATIONS	3	1.3 ( 0.41 - 4.11 )	1.3 ( 0.2 )
PULMONARY VALVE INCOMPETENCE	CARDIAC DISORDERS	3	4.08 ( 1.24 - 13.41 )	4.08 ( 6.33 )
FUNGAL OESOPHAGITIS	INFECTIONS AND INFESTATIONS	3	1.97 ( 0.62 - 6.29 )	1.97 ( 1.37 )
INTESTINAL SEPSIS	INFECTIONS AND INFESTATIONS	3	1.69 ( 0.53 - 5.37 )	1.69 ( 0.81 )
PERFORATED ULCER	GENERAL DISORDERS AND ADMINISTRATION SITE CONDITIONS	3	2.08 ( 0.65 - 6.64 )	2.08 ( 1.59 )
DRUG WITHDRAWAL SYNDROME	GENERAL DISORDERS AND ADMINISTRATION SITE CONDITIONS	3	0.75 ( 0.24 - 2.35 )	0.75 ( 0.25 )
HYPERAESTHESIA TEETH	GASTROINTESTINAL DISORDERS	3	2.58 ( 0.8 - 8.28 )	2.57 ( 2.71 )
ADDISON'S DISEASE	ENDOCRINE DISORDERS	3	1.94 ( 0.61 - 6.19 )	1.94 ( 1.31 )
PHARYNGEAL HAEMORRHAGE	RESPIRATORY, THORACIC AND MEDIASTINAL DISORDERS	3	3.82 ( 1.17 - 12.5 )	3.82 ( 5.7 )
HEPATITIS E	INFECTIONS AND INFESTATIONS	3	1.17 ( 0.37 - 3.7 )	1.17 ( 0.07 )
SARS-COV-2 ANTIBODY TEST POSITIVE	INVESTIGATIONS	3	9.11 ( 2.6 - 31.98 )	9.11 ( 17.6 )
X-RAY ABNORMAL	INVESTIGATIONS	3	0.17 ( 0.06 - 0.54 )	0.17 ( 11.65 )
SYNOVIAL RUPTURE	INJURY, POISONING AND PROCEDURAL COMPLICATIONS	3	1 ( 0.32 - 3.13 )	1 ( 0 )
CHRONIC RESPIRATORY FAILURE	RESPIRATORY, THORACIC AND MEDIASTINAL DISORDERS	3	3.82 ( 1.17 - 12.5 )	3.82 ( 5.7 )
SELF-INJURIOUS IDEATION	PSYCHIATRIC DISORDERS	3	4.23 ( 1.29 - 13.92 )	4.23 ( 6.68 )
EMPYEMA	INFECTIONS AND INFESTATIONS	3	0.56 ( 0.18 - 1.74 )	0.56 ( 1.05 )
CHEILITIS	GASTROINTESTINAL DISORDERS	3	0.57 ( 0.18 - 1.77 )	0.57 ( 0.98 )
PHARYNGEAL ULCERATION	RESPIRATORY, THORACIC AND MEDIASTINAL DISORDERS	3	1.52 ( 0.48 - 4.81 )	1.52 ( 0.51 )
HIGH DENSITY LIPOPROTEIN INCREASED	INVESTIGATIONS	3	2.96 ( 0.92 - 9.57 )	2.96 ( 3.62 )
WHITE MATTER LESION	NERVOUS SYSTEM DISORDERS	3	2.42 ( 0.75 - 7.76 )	2.42 ( 2.35 )
CELLULITIS STAPHYLOCOCCAL	INFECTIONS AND INFESTATIONS	3	2.19 ( 0.69 - 7.02 )	2.19 ( 1.85 )
GENITAL ABSCESS	INFECTIONS AND INFESTATIONS	3	2.96 ( 0.92 - 9.57 )	2.96 ( 3.62 )
ANGULAR CHEILITIS	GASTROINTESTINAL DISORDERS	3	3.48 ( 1.07 - 11.34 )	3.48 ( 4.88 )
GASTRITIS EROSIVE	GASTROINTESTINAL DISORDERS	3	0.62 ( 0.2 - 1.94 )	0.62 ( 0.69 )
ESCHERICHIA BACTERAEMIA	INFECTIONS AND INFESTATIONS	3	1.46 ( 0.46 - 4.63 )	1.46 ( 0.42 )
GASTROINTESTINAL ULCER	GASTROINTESTINAL DISORDERS	3	0.98 ( 0.31 - 3.08 )	0.98 ( 0 )
SKIN TIGHTNESS	SKIN AND SUBCUTANEOUS TISSUE DISORDERS	3	1.05 ( 0.33 - 3.3 )	1.05 ( 0.01 )
PERIPHERAL NERVE OPERATION	SURGICAL AND MEDICAL PROCEDURES	3	4.08 ( 1.24 - 13.41 )	4.08 ( 6.33 )
SKIN WEEPING	SKIN AND SUBCUTANEOUS TISSUE DISORDERS	3	6.97 ( 2.04 - 23.78 )	6.97 ( 13.03 )
DRUG ERUPTION	SKIN AND SUBCUTANEOUS TISSUE DISORDERS	3	0.1 ( 0.03 - 0.31 )	0.1 ( 24.46 )
MIGRAINE WITH AURA	NERVOUS SYSTEM DISORDERS	3	1.12 ( 0.35 - 3.52 )	1.12 ( 0.04 )
METAMORPHOPSIA	EYE DISORDERS	3	2.28 ( 0.71 - 7.29 )	2.28 ( 2.03 )
ALLERGIC OEDEMA	IMMUNE SYSTEM DISORDERS	3	1.15 ( 0.36 - 3.62 )	1.15 ( 0.06 )
VASCULAR INJURY	INJURY, POISONING AND PROCEDURAL COMPLICATIONS	3	1.29 ( 0.41 - 4.07 )	1.29 ( 0.19 )
ABDOMINAL MASS	GASTROINTESTINAL DISORDERS	3	0.81 ( 0.26 - 2.53 )	0.81 ( 0.14 )
PELVIC ABSCESS	INFECTIONS AND INFESTATIONS	3	2.42 ( 0.75 - 7.76 )	2.42 ( 2.35 )
OSTEOLYSIS	MUSCULOSKELETAL AND CONNECTIVE TISSUE DISORDERS	3	1 ( 0.32 - 3.16 )	1 ( 0 )
POST PROCEDURAL ERYTHEMA	INJURY, POISONING AND PROCEDURAL COMPLICATIONS	3	23.69 ( 5.66 - 99.13 )	23.69 ( 40.75 )
DERMATITIS INFECTED	INFECTIONS AND INFESTATIONS	3	2.82 ( 0.87 - 9.1 )	2.82 ( 3.29 )
ANXIETY DISORDER	PSYCHIATRIC DISORDERS	3	1.27 ( 0.4 - 4.02 )	1.27 ( 0.17 )
ARTERIAL REPAIR	SURGICAL AND MEDICAL PROCEDURES	3	5.92 ( 1.76 - 19.93 )	5.92 ( 10.67 )
BLOOD OESTROGEN DECREASED	INVESTIGATIONS	3	7.9 ( 2.29 - 27.28 )	7.9 ( 15.06 )
URINE ODOUR ABNORMAL	RENAL AND URINARY DISORDERS	3	0.43 ( 0.14 - 1.34 )	0.43 ( 2.25 )
STEROID THERAPY	SURGICAL AND MEDICAL PROCEDURES	3	3.95 ( 1.2 - 12.94 )	3.95 ( 6 )
ILL-DEFINED DISORDER	GENERAL DISORDERS AND ADMINISTRATION SITE CONDITIONS	3	0.02 ( 0.01 - 0.07 )	0.02 ( 126.86 )
ELECTIVE SURGERY	SURGICAL AND MEDICAL PROCEDURES	3	7.4 ( 2.16 - 25.41 )	7.4 ( 13.99 )
GASTROINTESTINAL ULCER HAEMORRHAGE	GASTROINTESTINAL DISORDERS	3	2.82 ( 0.87 - 9.1 )	2.82 ( 3.29 )
SPINAL CORD HERNIATION	NERVOUS SYSTEM DISORDERS	3	6.23 ( 1.84 - 21.07 )	6.23 ( 11.39 )
BLADDER CANCER RECURRENT	NEOPLASMS BENIGN, MALIGNANT AND UNSPECIFIED (INCL CYSTS AND POLYPS)	3	3.04 ( 0.94 - 9.83 )	3.04 ( 3.81 )
OPTIC NERVE INJURY	INJURY, POISONING AND PROCEDURAL COMPLICATIONS	3	2.89 ( 0.89 - 9.33 )	2.89 ( 3.45 )
HEPATIC INFECTION	INFECTIONS AND INFESTATIONS	3	1.22 ( 0.39 - 3.85 )	1.22 ( 0.12 )
AUDITORY DISORDER	EAR AND LABYRINTH DISORDERS	3	1.35 ( 0.43 - 4.25 )	1.35 ( 0.26 )
JOINT RESURFACING SURGERY	SURGICAL AND MEDICAL PROCEDURES	3	39.48 ( 7.97 - 195.64 )	39.48 ( 56.26 )
N-TERMINAL PROHORMONE BRAIN NATRIURETIC PEPTIDE INCREASED	INVESTIGATIONS	3	19.74 ( 4.94 - 78.94 )	19.74 ( 35.58 )
VENTRICULAR FIBRILLATION	CARDIAC DISORDERS	3	0.89 ( 0.28 - 2.8 )	0.89 ( 0.04 )
MEDICAL DEVICE SITE INJURY	GENERAL DISORDERS AND ADMINISTRATION SITE CONDITIONS	3	29.61 ( 6.63 - 132.32 )	29.61 ( 47.39 )
HAEMODIALYSIS	SURGICAL AND MEDICAL PROCEDURES	3	1.52 ( 0.48 - 4.81 )	1.52 ( 0.51 )
EYE INJURY	INJURY, POISONING AND PROCEDURAL COMPLICATIONS	3	0.49 ( 0.16 - 1.53 )	0.49 ( 1.58 )
SOFT TISSUE INJURY	INJURY, POISONING AND PROCEDURAL COMPLICATIONS	3	1.91 ( 0.6 - 6.09 )	1.91 ( 1.24 )
RHEUMATOID FACTOR DECREASED	INVESTIGATIONS	3	9.11 ( 2.6 - 31.98 )	9.11 ( 17.6 )
OESOPHAGEAL OBSTRUCTION	GASTROINTESTINAL DISORDERS	3	3.82 ( 1.17 - 12.5 )	3.82 ( 5.7 )
EYE ALLERGY	EYE DISORDERS	3	1.85 ( 0.58 - 5.89 )	1.85 ( 1.12 )
PANCREATITIS RELAPSING	GASTROINTESTINAL DISORDERS	3	6.58 ( 1.94 - 22.34 )	6.58 ( 12.17 )
MALNUTRITION	METABOLISM AND NUTRITION DISORDERS	3	0.46 ( 0.15 - 1.43 )	0.46 ( 1.89 )
MALIGNANT MELANOMA STAGE III	NEOPLASMS BENIGN, MALIGNANT AND UNSPECIFIED (INCL CYSTS AND POLYPS)	3	16.92 ( 4.38 - 65.44 )	16.92 ( 31.46 )
HYPERTROPHIC CARDIOMYOPATHY	CONGENITAL, FAMILIAL AND GENETIC DISORDERS	3	2.23 ( 0.7 - 7.15 )	2.23 ( 1.94 )
HAEMORRHOIDAL HAEMORRHAGE	GASTROINTESTINAL DISORDERS	3	0.77 ( 0.25 - 2.41 )	0.77 ( 0.2 )
WHITE BLOOD CELLS URINE POSITIVE	INVESTIGATIONS	3	1.1 ( 0.35 - 3.45 )	1.1 ( 0.02 )
OPTIC ISCHAEMIC NEUROPATHY	EYE DISORDERS	3	2.47 ( 0.77 - 7.92 )	2.47 ( 2.46 )
INFLUENZA VIRUS TEST POSITIVE	INVESTIGATIONS	3	7.9 ( 2.29 - 27.28 )	7.9 ( 15.06 )
HYPERPARATHYROIDISM	ENDOCRINE DISORDERS	3	2.12 ( 0.66 - 6.76 )	2.12 ( 1.67 )
UTERINE DISORDER	REPRODUCTIVE SYSTEM AND BREAST DISORDERS	3	0.48 ( 0.15 - 1.49 )	0.48 ( 1.69 )
TENSION HEADACHE	NERVOUS SYSTEM DISORDERS	3	1.2 ( 0.38 - 3.77 )	1.2 ( 0.09 )
ADRENAL MASS	ENDOCRINE DISORDERS	3	2.58 ( 0.8 - 8.28 )	2.57 ( 2.71 )
NEURITIS	NERVOUS SYSTEM DISORDERS	3	1.35 ( 0.43 - 4.25 )	1.35 ( 0.26 )
MALIGNANT MELANOMA IN SITU	NEOPLASMS BENIGN, MALIGNANT AND UNSPECIFIED (INCL CYSTS AND POLYPS)	3	1.29 ( 0.41 - 4.07 )	1.29 ( 0.19 )
GENITAL RASH	REPRODUCTIVE SYSTEM AND BREAST DISORDERS	3	2.58 ( 0.8 - 8.28 )	2.57 ( 2.71 )
SKIN OPERATION	SURGICAL AND MEDICAL PROCEDURES	3	6.23 ( 1.84 - 21.07 )	6.23 ( 11.39 )
VITAMIN D DEFICIENCY	METABOLISM AND NUTRITION DISORDERS	3	0.24 ( 0.08 - 0.74 )	0.24 ( 7.24 )
HYPERURICAEMIA	METABOLISM AND NUTRITION DISORDERS	3	2.37 ( 0.74 - 7.6 )	2.37 ( 2.24 )
BLOOD PRESSURE SYSTOLIC INCREASED	INVESTIGATIONS	3	0.04 ( 0.01 - 0.12 )	0.04 ( 70.55 )
ATLANTOAXIAL SUBLUXATION	MUSCULOSKELETAL AND CONNECTIVE TISSUE DISORDERS	3	16.92 ( 4.38 - 65.44 )	16.92 ( 31.46 )
LOOSE TOOTH	GASTROINTESTINAL DISORDERS	3	0.64 ( 0.2 - 2 )	0.64 ( 0.6 )
LIP DRY	GASTROINTESTINAL DISORDERS	3	0.11 ( 0.03 - 0.33 )	0.11 ( 22.38 )
NASAL HERPES	INFECTIONS AND INFESTATIONS	3	3.29 ( 1.01 - 10.68 )	3.29 ( 4.41 )
MEDICAL DEVICE SITE JOINT PAIN	GENERAL DISORDERS AND ADMINISTRATION SITE CONDITIONS	3	11.85 ( 3.26 - 43.04 )	11.84 ( 22.91 )
ALVEOLAR OSTEITIS	INFECTIONS AND INFESTATIONS	3	4.56 ( 1.38 - 15.05 )	4.56 ( 7.46 )
SYNOVIAL FLUID ANALYSIS ABNORMAL	INVESTIGATIONS	3	11.85 ( 3.26 - 43.04 )	11.84 ( 22.91 )
ENTERITIS	GASTROINTESTINAL DISORDERS	3	0.75 ( 0.24 - 2.36 )	0.75 ( 0.24 )
SEPTIC ARTHRITIS STAPHYLOCOCCAL	INFECTIONS AND INFESTATIONS	3	1.02 ( 0.32 - 3.21 )	1.02 ( 0 )
FAECES HARD	GASTROINTESTINAL DISORDERS	3	2.42 ( 0.75 - 7.76 )	2.42 ( 2.35 )
URETEROLITHIASIS	RENAL AND URINARY DISORDERS	3	1.85 ( 0.58 - 5.89 )	1.85 ( 1.12 )
BRONCHIECTASIS	RESPIRATORY, THORACIC AND MEDIASTINAL DISORDERS	3	0.16 ( 0.05 - 0.49 )	0.16 ( 13.37 )
OVARIAN ENLARGEMENT	REPRODUCTIVE SYSTEM AND BREAST DISORDERS	3	6.97 ( 2.04 - 23.78 )	6.97 ( 13.03 )
PERIPHERAL ARTERY THROMBOSIS	VASCULAR DISORDERS	3	2.75 ( 0.85 - 8.88 )	2.75 ( 3.13 )
MUCOSAL INFLAMMATION	GENERAL DISORDERS AND ADMINISTRATION SITE CONDITIONS	3	0.15 ( 0.05 - 0.48 )	0.15 ( 13.81 )
OVARIAN CANCER METASTATIC	NEOPLASMS BENIGN, MALIGNANT AND UNSPECIFIED (INCL CYSTS AND POLYPS)	3	1.79 ( 0.56 - 5.71 )	1.79 ( 1.01 )
INTRA-UTERINE CONTRACEPTIVE DEVICE REMOVAL	SURGICAL AND MEDICAL PROCEDURES	3	59.23 ( 9.9 - 354.47 )	59.22 ( 68.69 )
CIRCUMSTANCE OR INFORMATION CAPABLE OF LEADING TO MEDICATION ERROR	INJURY, POISONING AND PROCEDURAL COMPLICATIONS	3	0.25 ( 0.08 - 0.79 )	0.25 ( 6.5 )
AORTIC DILATATION	VASCULAR DISORDERS	3	2.32 ( 0.72 - 7.44 )	2.32 ( 2.13 )
FEMALE GENITAL OPERATION	SURGICAL AND MEDICAL PROCEDURES	3	7.9 ( 2.29 - 27.28 )	7.9 ( 15.06 )
SOMNAMBULISM	PSYCHIATRIC DISORDERS	3	4.39 ( 1.33 - 14.46 )	4.39 ( 7.06 )
SKIN BACTERIAL INFECTION	INFECTIONS AND INFESTATIONS	3	1.74 ( 0.55 - 5.54 )	1.74 ( 0.91 )
BONE CYST	MUSCULOSKELETAL AND CONNECTIVE TISSUE DISORDERS	3	0.44 ( 0.14 - 1.37 )	0.44 ( 2.13 )
HAEMATOLOGICAL MALIGNANCY	NEOPLASMS BENIGN, MALIGNANT AND UNSPECIFIED (INCL CYSTS AND POLYPS)	3	2.96 ( 0.92 - 9.57 )	2.96 ( 3.62 )
NON-ALCOHOLIC STEATOHEPATITIS	HEPATOBILIARY DISORDERS	3	1.07 ( 0.34 - 3.36 )	1.07 ( 0.01 )
ESSENTIAL TREMOR	NERVOUS SYSTEM DISORDERS	3	2.28 ( 0.71 - 7.29 )	2.28 ( 2.03 )
DEVICE DIFFICULT TO USE	INJURY, POISONING AND PROCEDURAL COMPLICATIONS	3	0.07 ( 0.02 - 0.22 )	0.07 ( 36.79 )
DAYDREAMING	PSYCHIATRIC DISORDERS	3	2.32 ( 0.72 - 7.44 )	2.32 ( 2.13 )
DIABETIC COMA	NERVOUS SYSTEM DISORDERS	3	2.63 ( 0.82 - 8.47 )	2.63 ( 2.85 )
SENSORY LOSS	NERVOUS SYSTEM DISORDERS	3	0.34 ( 0.11 - 1.06 )	0.34 ( 3.82 )
KLEBSIELLA INFECTION	INFECTIONS AND INFESTATIONS	3	0.84 ( 0.27 - 2.64 )	0.84 ( 0.09 )
PULMONARY ARTERIAL HYPERTENSION	RESPIRATORY, THORACIC AND MEDIASTINAL DISORDERS	3	0.88 ( 0.28 - 2.75 )	0.88 ( 0.05 )
EPSTEIN-BARR VIRUS INFECTION	INFECTIONS AND INFESTATIONS	3	0.25 ( 0.08 - 0.79 )	0.25 ( 6.57 )
INTENSIVE CARE	SURGICAL AND MEDICAL PROCEDURES	3	3.95 ( 1.2 - 12.94 )	3.95 ( 6 )
LYMPHADENOPATHY MEDIASTINAL	BLOOD AND LYMPHATIC SYSTEM DISORDERS	3	1.06 ( 0.34 - 3.33 )	1.06 ( 0.01 )
BUNDLE BRANCH BLOCK LEFT	CARDIAC DISORDERS	3	1.03 ( 0.33 - 3.24 )	1.03 ( 0 )
OSTEOGENESIS IMPERFECTA	CONGENITAL, FAMILIAL AND GENETIC DISORDERS	3	2.01 ( 0.63 - 6.4 )	2.01 ( 1.44 )
MUSCLE DISCOMFORT	MUSCULOSKELETAL AND CONNECTIVE TISSUE DISORDERS	3	8.46 ( 2.43 - 29.44 )	8.46 ( 16.25 )
CARDIAC ANEURYSM	CARDIAC DISORDERS	3	2.08 ( 0.65 - 6.64 )	2.08 ( 1.59 )
GASTRIC POLYPS	GASTROINTESTINAL DISORDERS	3	1 ( 0.32 - 3.13 )	1 ( 0 )
ARTHROFIBROSIS	MUSCULOSKELETAL AND CONNECTIVE TISSUE DISORDERS	3	39.48 ( 7.97 - 195.64 )	39.48 ( 56.26 )
MEDICAL DEVICE SITE PAIN	GENERAL DISORDERS AND ADMINISTRATION SITE CONDITIONS	3	4.08 ( 1.24 - 13.41 )	4.08 ( 6.33 )
BLOOD ELECTROLYTES DECREASED	INVESTIGATIONS	3	2.47 ( 0.77 - 7.92 )	2.47 ( 2.46 )
GROIN INFECTION	INFECTIONS AND INFESTATIONS	3	1.97 ( 0.62 - 6.29 )	1.97 ( 1.37 )
HEPATIC NEOPLASM	NEOPLASMS BENIGN, MALIGNANT AND UNSPECIFIED (INCL CYSTS AND POLYPS)	3	0.73 ( 0.23 - 2.29 )	0.73 ( 0.29 )
BRAIN STEM HAEMORRHAGE	NERVOUS SYSTEM DISORDERS	3	4.56 ( 1.38 - 15.05 )	4.56 ( 7.46 )
SEBORRHOEIC KERATOSIS	NEOPLASMS BENIGN, MALIGNANT AND UNSPECIFIED (INCL CYSTS AND POLYPS)	3	1.54 ( 0.49 - 4.88 )	1.54 ( 0.54 )
VACCINATION FAILURE	GENERAL DISORDERS AND ADMINISTRATION SITE CONDITIONS	3	1.94 ( 0.61 - 6.19 )	1.94 ( 1.31 )
EYE INFECTION STAPHYLOCOCCAL	INFECTIONS AND INFESTATIONS	3	4.74 ( 1.43 - 15.69 )	4.74 ( 7.9 )
PROSTATE CANCER METASTATIC	NEOPLASMS BENIGN, MALIGNANT AND UNSPECIFIED (INCL CYSTS AND POLYPS)	3	1.74 ( 0.55 - 5.54 )	1.74 ( 0.91 )
CAROTID ARTERY DISEASE	NERVOUS SYSTEM DISORDERS	3	1.58 ( 0.5 - 5.01 )	1.58 ( 0.61 )
LICHEN SCLEROSUS	SKIN AND SUBCUTANEOUS TISSUE DISORDERS	3	1.82 ( 0.57 - 5.8 )	1.82 ( 1.06 )
INGROWN HAIR	SKIN AND SUBCUTANEOUS TISSUE DISORDERS	3	1.16 ( 0.37 - 3.66 )	1.16 ( 0.07 )
DISSEMINATED VARICELLA ZOSTER VIRUS INFECTION	INFECTIONS AND INFESTATIONS	3	6.97 ( 2.04 - 23.78 )	6.97 ( 13.03 )
FEBRILE NEUTROPENIA	BLOOD AND LYMPHATIC SYSTEM DISORDERS	3	0.32 ( 0.1 - 1.01 )	0.32 ( 4.23 )
CEREBROVASCULAR DISORDER	NERVOUS SYSTEM DISORDERS	3	0.96 ( 0.3 - 3 )	0.96 ( 0.01 )
EXPOSURE TO TOXIC AGENT	INJURY, POISONING AND PROCEDURAL COMPLICATIONS	3	1.97 ( 0.62 - 6.29 )	1.97 ( 1.37 )
OSTEONECROSIS OF JAW	MUSCULOSKELETAL AND CONNECTIVE TISSUE DISORDERS	3	0.21 ( 0.07 - 0.65 )	0.21 ( 8.94 )
CUBITAL TUNNEL SYNDROME	NERVOUS SYSTEM DISORDERS	3	2.04 ( 0.64 - 6.52 )	2.04 ( 1.52 )
PARANEOPLASTIC SYNDROME	NEOPLASMS BENIGN, MALIGNANT AND UNSPECIFIED (INCL CYSTS AND POLYPS)	3	5.92 ( 1.76 - 19.93 )	5.92 ( 10.67 )
BONE MARROW DISORDER	BLOOD AND LYMPHATIC SYSTEM DISORDERS	3	0.89 ( 0.28 - 2.8 )	0.89 ( 0.04 )
ACTINIC KERATOSIS	SKIN AND SUBCUTANEOUS TISSUE DISORDERS	3	0.74 ( 0.23 - 2.31 )	0.74 ( 0.28 )
ORAL MUCOSAL ERUPTION	GASTROINTESTINAL DISORDERS	3	1.52 ( 0.48 - 4.81 )	1.52 ( 0.51 )
HERPES ZOSTER MENINGITIS	INFECTIONS AND INFESTATIONS	3	5.64 ( 1.68 - 18.91 )	5.64 ( 10.02 )
POLYMYOSITIS	MUSCULOSKELETAL AND CONNECTIVE TISSUE DISORDERS	3	0.78 ( 0.25 - 2.44 )	0.78 ( 0.18 )
BRONCHOPULMONARY ASPERGILLOSIS	INFECTIONS AND INFESTATIONS	3	0.5 ( 0.16 - 1.57 )	0.5 ( 1.45 )
FREEZING PHENOMENON	NERVOUS SYSTEM DISORDERS	3	7.9 ( 2.29 - 27.28 )	7.9 ( 15.06 )
LIVE BIRTH	PREGNANCY, PUERPERIUM AND PERINATAL CONDITIONS	3	0.14 ( 0.05 - 0.43 )	0.14 ( 15.82 )
BREAST PROSTHESIS REMOVAL	SURGICAL AND MEDICAL PROCEDURES	3	13.16 ( 3.56 - 48.62 )	13.16 ( 25.28 )
CONTRAST MEDIA ALLERGY	IMMUNE SYSTEM DISORDERS	3	0.67 ( 0.21 - 2.08 )	0.67 ( 0.5 )
VITAMIN B12 DECREASED	INVESTIGATIONS	3	0.74 ( 0.24 - 2.32 )	0.74 ( 0.27 )
BLISTER INFECTED	INFECTIONS AND INFESTATIONS	3	1.08 ( 0.34 - 3.39 )	1.08 ( 0.02 )
JOINT SPACE NARROWING	MUSCULOSKELETAL AND CONNECTIVE TISSUE DISORDERS	3	1.65 ( 0.52 - 5.22 )	1.65 ( 0.73 )
CATARACT OPERATION COMPLICATION	INJURY, POISONING AND PROCEDURAL COMPLICATIONS	3	2.08 ( 0.65 - 6.64 )	2.08 ( 1.59 )
VULVOVAGINAL MYCOTIC INFECTION	INFECTIONS AND INFESTATIONS	3	0.26 ( 0.08 - 0.81 )	0.26 ( 6.26 )
ORAL NEOPLASM	NEOPLASMS BENIGN, MALIGNANT AND UNSPECIFIED (INCL CYSTS AND POLYPS)	3	4.23 ( 1.29 - 13.92 )	4.23 ( 6.68 )
PARATHYROID DISORDER	ENDOCRINE DISORDERS	3	2.75 ( 0.85 - 8.88 )	2.75 ( 3.13 )
PROTHROMBIN TIME PROLONGED	INVESTIGATIONS	3	1.41 ( 0.45 - 4.46 )	1.41 ( 0.35 )
ALLERGY TO METALS	IMMUNE SYSTEM DISORDERS	3	1.85 ( 0.58 - 5.89 )	1.85 ( 1.12 )
FINE MOTOR SKILL DYSFUNCTION	NERVOUS SYSTEM DISORDERS	3	0.25 ( 0.08 - 0.77 )	0.25 ( 6.81 )
CHOLESTEATOMA	NEOPLASMS BENIGN, MALIGNANT AND UNSPECIFIED (INCL CYSTS AND POLYPS)	3	4.23 ( 1.29 - 13.92 )	4.23 ( 6.68 )
EXCESSIVE SKIN	SKIN AND SUBCUTANEOUS TISSUE DISORDERS	3	2.89 ( 0.89 - 9.33 )	2.89 ( 3.45 )
PARANASAL SINUS HAEMORRHAGE	RESPIRATORY, THORACIC AND MEDIASTINAL DISORDERS	3	19.74 ( 4.94 - 78.94 )	19.74 ( 35.58 )
HAEMORRHAGE SUBCUTANEOUS	SKIN AND SUBCUTANEOUS TISSUE DISORDERS	3	0.91 ( 0.29 - 2.86 )	0.91 ( 0.03 )
CYTOMEGALOVIRUS VIRAEMIA	INFECTIONS AND INFESTATIONS	3	7.9 ( 2.29 - 27.28 )	7.9 ( 15.06 )
PNEUMONIA CYTOMEGALOVIRAL	INFECTIONS AND INFESTATIONS	3	1.85 ( 0.58 - 5.89 )	1.85 ( 1.12 )
CORNEAL TRANSPLANT	SURGICAL AND MEDICAL PROCEDURES	3	2.15 ( 0.67 - 6.88 )	2.15 ( 1.76 )
COMPUTERISED TOMOGRAM ABNORMAL	INVESTIGATIONS	3	1.06 ( 0.34 - 3.33 )	1.06 ( 0.01 )
POLYCHONDRITIS	MUSCULOSKELETAL AND CONNECTIVE TISSUE DISORDERS	3	2.04 ( 0.64 - 6.52 )	2.04 ( 1.52 )
AORTIC STENOSIS	VASCULAR DISORDERS	3	0.67 ( 0.21 - 2.11 )	0.67 ( 0.47 )
CENTRAL NERVOUS SYSTEM LESION	NERVOUS SYSTEM DISORDERS	3	0.55 ( 0.17 - 1.71 )	0.55 ( 1.12 )
SALMONELLOSIS	INFECTIONS AND INFESTATIONS	3	0.91 ( 0.29 - 2.86 )	0.91 ( 0.03 )
ANAPHYLACTIC SHOCK	IMMUNE SYSTEM DISORDERS	3	0.21 ( 0.07 - 0.66 )	0.21 ( 8.65 )
HIGH FREQUENCY ABLATION	SURGICAL AND MEDICAL PROCEDURES	3	5.92 ( 1.76 - 19.93 )	5.92 ( 10.67 )
METABOLIC ACIDOSIS	METABOLISM AND NUTRITION DISORDERS	3	0.49 ( 0.16 - 1.52 )	0.49 ( 1.62 )
OESOPHAGEAL STENOSIS	GASTROINTESTINAL DISORDERS	3	0.96 ( 0.3 - 3 )	0.96 ( 0.01 )
VERTEBRAL COLUMN MASS	MUSCULOSKELETAL AND CONNECTIVE TISSUE DISORDERS	3	4.08 ( 1.24 - 13.41 )	4.08 ( 6.33 )
COLONOSCOPY	INVESTIGATIONS	3	0.87 ( 0.28 - 2.73 )	0.87 ( 0.06 )
BLADDER CATHETERISATION	SURGICAL AND MEDICAL PROCEDURES	3	10.77 ( 3 - 38.6 )	10.77 ( 20.89 )
HEPATIC CYST	HEPATOBILIARY DISORDERS	3	0.43 ( 0.14 - 1.34 )	0.43 ( 2.25 )
SKIN PLAQUE	SKIN AND SUBCUTANEOUS TISSUE DISORDERS	3	0.44 ( 0.14 - 1.37 )	0.44 ( 2.13 )
PNEUMONIA INFLUENZAL	INFECTIONS AND INFESTATIONS	3	3.04 ( 0.94 - 9.83 )	3.04 ( 3.81 )
THYROID NEOPLASM	NEOPLASMS BENIGN, MALIGNANT AND UNSPECIFIED (INCL CYSTS AND POLYPS)	3	0.29 ( 0.09 - 0.91 )	0.29 ( 5.12 )
STREPTOCOCCUS TEST POSITIVE	INVESTIGATIONS	3	1.94 ( 0.61 - 6.19 )	1.94 ( 1.31 )
FRACTURE NONUNION	MUSCULOSKELETAL AND CONNECTIVE TISSUE DISORDERS	3	1.58 ( 0.5 - 5.01 )	1.58 ( 0.61 )
EAR HAEMORRHAGE	EAR AND LABYRINTH DISORDERS	3	1.32 ( 0.42 - 4.16 )	1.32 ( 0.22 )
CLEAR CELL RENAL CELL CARCINOMA	NEOPLASMS BENIGN, MALIGNANT AND UNSPECIFIED (INCL CYSTS AND POLYPS)	3	3.95 ( 1.2 - 12.94 )	3.95 ( 6 )
SINUSITIS BACTERIAL	INFECTIONS AND INFESTATIONS	3	1.12 ( 0.35 - 3.52 )	1.12 ( 0.04 )
FISTULA	MUSCULOSKELETAL AND CONNECTIVE TISSUE DISORDERS	3	0.38 ( 0.12 - 1.2 )	0.38 ( 2.93 )
CHOLECYSTITIS INFECTIVE	INFECTIONS AND INFESTATIONS	3	0.6 ( 0.19 - 1.86 )	0.6 ( 0.81 )
JAUNDICE	HEPATOBILIARY DISORDERS	3	0.27 ( 0.09 - 0.83 )	0.27 ( 6.03 )
PULSE ABSENT	INVESTIGATIONS	3	1.94 ( 0.61 - 6.19 )	1.94 ( 1.31 )
ABDOMINAL INFECTION	INFECTIONS AND INFESTATIONS	3	0.94 ( 0.3 - 2.95 )	0.94 ( 0.01 )
BLOOD CHOLESTEROL DECREASED	INVESTIGATIONS	3	3.04 ( 0.94 - 9.83 )	3.04 ( 3.81 )
ENDOMETRIAL ABLATION	SURGICAL AND MEDICAL PROCEDURES	3	7.4 ( 2.16 - 25.41 )	7.4 ( 13.99 )
SCHIZOAFFECTIVE DISORDER	PSYCHIATRIC DISORDERS	3	39.48 ( 7.97 - 195.64 )	39.48 ( 56.26 )
DUPUYTREN'S CONTRACTURE	MUSCULOSKELETAL AND CONNECTIVE TISSUE DISORDERS	3	1.48 ( 0.47 - 4.69 )	1.48 ( 0.45 )
HYPOKINESIA	NERVOUS SYSTEM DISORDERS	3	0.15 ( 0.05 - 0.47 )	0.15 ( 14.18 )
HYPERGAMMAGLOBULINAEMIA BENIGN MONOCLONAL	NEOPLASMS BENIGN, MALIGNANT AND UNSPECIFIED (INCL CYSTS AND POLYPS)	3	1.58 ( 0.5 - 5.01 )	1.58 ( 0.61 )
OTORRHOEA	EAR AND LABYRINTH DISORDERS	3	0.79 ( 0.25 - 2.48 )	0.79 ( 0.16 )
CHOLANGITIS	HEPATOBILIARY DISORDERS	3	0.69 ( 0.22 - 2.17 )	0.69 ( 0.4 )
NASAL OPERATION	SURGICAL AND MEDICAL PROCEDURES	3	2.82 ( 0.87 - 9.1 )	2.82 ( 3.29 )
GASTRITIS HAEMORRHAGIC	GASTROINTESTINAL DISORDERS	3	2.96 ( 0.92 - 9.57 )	2.96 ( 3.62 )
DISSEMINATED INTRAVASCULAR COAGULATION	BLOOD AND LYMPHATIC SYSTEM DISORDERS	3	0.24 ( 0.08 - 0.76 )	0.24 ( 6.97 )
BLOOD UREA NITROGEN/CREATININE RATIO INCREASED	INVESTIGATIONS	3	6.23 ( 1.84 - 21.07 )	6.23 ( 11.39 )
ANIMAL SCRATCH	INJURY, POISONING AND PROCEDURAL COMPLICATIONS	3	0.63 ( 0.2 - 1.96 )	0.63 ( 0.66 )
VENOUS PERFORATION	VASCULAR DISORDERS	3	14.81 ( 3.93 - 55.81 )	14.81 ( 28.09 )
GALLBLADDER POLYP	HEPATOBILIARY DISORDERS	3	2.82 ( 0.87 - 9.1 )	2.82 ( 3.29 )
RED BLOOD CELL SEDIMENTATION RATE DECREASED	INVESTIGATIONS	3	1.54 ( 0.49 - 4.88 )	1.54 ( 0.54 )
METABOLIC ENCEPHALOPATHY	NERVOUS SYSTEM DISORDERS	3	3.59 ( 1.1 - 11.7 )	3.59 ( 5.14 )
NOROVIRUS INFECTION	INFECTIONS AND INFESTATIONS	3	7.4 ( 2.16 - 25.41 )	7.4 ( 13.99 )
RETINAL DISORDER	EYE DISORDERS	3	0.87 ( 0.28 - 2.73 )	0.87 ( 0.06 )
BILIARY SEPSIS	INFECTIONS AND INFESTATIONS	3	4.56 ( 1.38 - 15.05 )	4.56 ( 7.46 )
JOINT INJECTION	SURGICAL AND MEDICAL PROCEDURES	3	3.2 ( 0.99 - 10.38 )	3.2 ( 4.2 )
RENAL ARTERY STENT PLACEMENT	SURGICAL AND MEDICAL PROCEDURES	3	14.81 ( 3.93 - 55.81 )	14.81 ( 28.09 )
NEPHROGENIC ANAEMIA	BLOOD AND LYMPHATIC SYSTEM DISORDERS	3	3.12 ( 0.96 - 10.1 )	3.12 ( 4 )
PANIC REACTION	PSYCHIATRIC DISORDERS	3	0.96 ( 0.3 - 3 )	0.96 ( 0.01 )
HEART VALVE STENOSIS	CARDIAC DISORDERS	3	2.89 ( 0.89 - 9.33 )	2.89 ( 3.45 )
LAZINESS	PSYCHIATRIC DISORDERS	3	2.75 ( 0.85 - 8.88 )	2.75 ( 3.13 )
POSITIVE AIRWAY PRESSURE THERAPY	SURGICAL AND MEDICAL PROCEDURES	3	16.92 ( 4.38 - 65.44 )	16.92 ( 31.46 )
HAEMORRHOIDS THROMBOSED	GASTROINTESTINAL DISORDERS	3	5.15 ( 1.55 - 17.15 )	5.15 ( 8.87 )
ATROPHY	GENERAL DISORDERS AND ADMINISTRATION SITE CONDITIONS	3	0.83 ( 0.26 - 2.6 )	0.83 ( 0.1 )
MECHANICAL ILEUS	GASTROINTESTINAL DISORDERS	3	3.2 ( 0.99 - 10.38 )	3.2 ( 4.2 )
AORTIC ANEURYSM RUPTURE	VASCULAR DISORDERS	3	1.6 ( 0.5 - 5.08 )	1.6 ( 0.65 )
INTRACRANIAL INFECTION	INFECTIONS AND INFESTATIONS	3	118.45 ( 12.32 - 1138.82 )	118.45 ( 87.34 )
PERIPHERAL VEIN OCCLUSION	VASCULAR DISORDERS	3	10.77 ( 3 - 38.6 )	10.77 ( 20.89 )
ABORTION INDUCED	SURGICAL AND MEDICAL PROCEDURES	3	0.7 ( 0.22 - 2.2 )	0.7 ( 0.38 )
BLOOD SODIUM ABNORMAL	INVESTIGATIONS	3	2.82 ( 0.87 - 9.1 )	2.82 ( 3.29 )
JOINT ABSCESS	INFECTIONS AND INFESTATIONS	3	1.88 ( 0.59 - 5.99 )	1.88 ( 1.18 )
EXTRA DOSE ADMINISTERED	INJURY, POISONING AND PROCEDURAL COMPLICATIONS	3	0.29 ( 0.09 - 0.9 )	0.29 ( 5.21 )
HEPATIC ENCEPHALOPATHY	NERVOUS SYSTEM DISORDERS	3	1.62 ( 0.51 - 5.15 )	1.62 ( 0.69 )
ACUTE CORONARY SYNDROME	CARDIAC DISORDERS	3	0.46 ( 0.15 - 1.44 )	0.46 ( 1.87 )
VENOUS STENT INSERTION	SURGICAL AND MEDICAL PROCEDURES	3	118.45 ( 12.32 - 1138.82 )	118.45 ( 87.34 )
IDIOPATHIC PULMONARY FIBROSIS	RESPIRATORY, THORACIC AND MEDIASTINAL DISORDERS	3	1.27 ( 0.4 - 4.02 )	1.27 ( 0.17 )
SYNOVIAL DISORDER	MUSCULOSKELETAL AND CONNECTIVE TISSUE DISORDERS	3	0.64 ( 0.21 - 2.01 )	0.64 ( 0.58 )
FOETAL DEATH	PREGNANCY, PUERPERIUM AND PERINATAL CONDITIONS	3	0.43 ( 0.14 - 1.33 )	0.43 ( 2.27 )
INFLAMMATION OF WOUND	INJURY, POISONING AND PROCEDURAL COMPLICATIONS	3	2.52 ( 0.78 - 8.1 )	2.52 ( 2.59 )
PLATELET COUNT ABNORMAL	INVESTIGATIONS	3	1.46 ( 0.46 - 4.63 )	1.46 ( 0.42 )
OESOPHAGEAL DILATION PROCEDURE	SURGICAL AND MEDICAL PROCEDURES	3	14.81 ( 3.93 - 55.81 )	14.81 ( 28.09 )
PARAINFLUENZAE VIRUS INFECTION	INFECTIONS AND INFESTATIONS	3	9.11 ( 2.6 - 31.98 )	9.11 ( 17.6 )
ADENOCARCINOMA PANCREAS	NEOPLASMS BENIGN, MALIGNANT AND UNSPECIFIED (INCL CYSTS AND POLYPS)	3	2.69 ( 0.84 - 8.67 )	2.69 ( 2.99 )
INTERMENSTRUAL BLEEDING	REPRODUCTIVE SYSTEM AND BREAST DISORDERS	3	5.92 ( 1.76 - 19.93 )	5.92 ( 10.67 )
THROMBOTIC STROKE	NERVOUS SYSTEM DISORDERS	3	6.58 ( 1.94 - 22.34 )	6.58 ( 12.17 )
UNDERWEIGHT	METABOLISM AND NUTRITION DISORDERS	3	1.52 ( 0.48 - 4.81 )	1.52 ( 0.51 )
CORNEAL OEDEMA	EYE DISORDERS	3	3.7 ( 1.13 - 12.09 )	3.7 ( 5.41 )
EYELID DISORDER	EYE DISORDERS	3	0.9 ( 0.29 - 2.82 )	0.9 ( 0.03 )
PITUITARY TUMOUR	NEOPLASMS BENIGN, MALIGNANT AND UNSPECIFIED (INCL CYSTS AND POLYPS)	3	1.85 ( 0.58 - 5.89 )	1.85 ( 1.12 )
AORTIC VALVE STENOSIS	CARDIAC DISORDERS	3	0.56 ( 0.18 - 1.76 )	0.56 ( 1 )
LIGAMENT OPERATION	SURGICAL AND MEDICAL PROCEDURES	3	3.95 ( 1.2 - 12.94 )	3.95 ( 6 )
ALVEOLITIS	RESPIRATORY, THORACIC AND MEDIASTINAL DISORDERS	3	0.68 ( 0.22 - 2.13 )	0.68 ( 0.44 )
JAW OPERATION	SURGICAL AND MEDICAL PROCEDURES	3	3.38 ( 1.04 - 11 )	3.38 ( 4.64 )
TRAUMATIC FRACTURE	INJURY, POISONING AND PROCEDURAL COMPLICATIONS	3	4.94 ( 1.49 - 16.39 )	4.94 ( 8.37 )
DUODENAL ULCER HAEMORRHAGE	GASTROINTESTINAL DISORDERS	3	1.67 ( 0.53 - 5.3 )	1.67 ( 0.77 )
MEDICAL DEVICE SITE INFECTION	INFECTIONS AND INFESTATIONS	3	3.29 ( 1.01 - 10.68 )	3.29 ( 4.41 )
ENTEROCOLITIS	GASTROINTESTINAL DISORDERS	3	0.7 ( 0.22 - 2.18 )	0.7 ( 0.39 )
ASPERGILLUS INFECTION	INFECTIONS AND INFESTATIONS	3	0.88 ( 0.28 - 2.75 )	0.88 ( 0.05 )
EYE OEDEMA	EYE DISORDERS	3	1.5 ( 0.47 - 4.75 )	1.5 ( 0.48 )
BITE	INJURY, POISONING AND PROCEDURAL COMPLICATIONS	3	1.94 ( 0.61 - 6.19 )	1.94 ( 1.31 )
STAPHYLOCOCCAL ABSCESS	INFECTIONS AND INFESTATIONS	3	1.52 ( 0.48 - 4.81 )	1.52 ( 0.51 )
GASTROINTESTINAL POLYP	GASTROINTESTINAL DISORDERS	3	6.23 ( 1.84 - 21.07 )	6.23 ( 11.39 )
T-CELL LYMPHOMA	NEOPLASMS BENIGN, MALIGNANT AND UNSPECIFIED (INCL CYSTS AND POLYPS)	3	1.23 ( 0.39 - 3.89 )	1.23 ( 0.13 )
CERVICAL RADICULOPATHY	NERVOUS SYSTEM DISORDERS	3	1.88 ( 0.59 - 5.99 )	1.88 ( 1.18 )
HYPERTHERMIA	GENERAL DISORDERS AND ADMINISTRATION SITE CONDITIONS	3	1.12 ( 0.35 - 3.52 )	1.12 ( 0.04 )
PERIORBITAL CELLULITIS	INFECTIONS AND INFESTATIONS	3	4.74 ( 1.43 - 15.69 )	4.74 ( 7.9 )
DIVERTICULITIS INTESTINAL HAEMORRHAGIC	INFECTIONS AND INFESTATIONS	3	5.64 ( 1.68 - 18.91 )	5.64 ( 10.02 )
RHEUMATIC FEVER	MUSCULOSKELETAL AND CONNECTIVE TISSUE DISORDERS	3	0.05 ( 0.02 - 0.17 )	0.05 ( 48.76 )
EYELID INFECTION	INFECTIONS AND INFESTATIONS	3	2.47 ( 0.77 - 7.92 )	2.47 ( 2.46 )
SPINAL CORD OPERATION	SURGICAL AND MEDICAL PROCEDURES	3	16.92 ( 4.38 - 65.44 )	16.92 ( 31.46 )
OESOPHAGEAL DISORDER	GASTROINTESTINAL DISORDERS	3	0.61 ( 0.19 - 1.9 )	0.61 ( 0.75 )
EAR INJURY	INJURY, POISONING AND PROCEDURAL COMPLICATIONS	3	3.82 ( 1.17 - 12.5 )	3.82 ( 5.7 )
ANTINUCLEAR ANTIBODY INCREASED	INVESTIGATIONS	3	1.35 ( 0.43 - 4.25 )	1.35 ( 0.26 )
APPENDIX DISORDER	GASTROINTESTINAL DISORDERS	3	0.81 ( 0.26 - 2.54 )	0.81 ( 0.13 )
LIP AND/OR ORAL CAVITY CANCER	NEOPLASMS BENIGN, MALIGNANT AND UNSPECIFIED (INCL CYSTS AND POLYPS)	3	1.11 ( 0.35 - 3.49 )	1.11 ( 0.03 )
MYASTHENIA GRAVIS	NERVOUS SYSTEM DISORDERS	3	0.67 ( 0.21 - 2.09 )	0.67 ( 0.48 )
MALIGNANT ASCITES	GASTROINTESTINAL DISORDERS	3	6.23 ( 1.84 - 21.07 )	6.23 ( 11.39 )
IMMUNODEFICIENCY COMMON VARIABLE	IMMUNE SYSTEM DISORDERS	3	5.15 ( 1.55 - 17.15 )	5.15 ( 8.87 )
HAEMATOMA MUSCLE	MUSCULOSKELETAL AND CONNECTIVE TISSUE DISORDERS	3	19.74 ( 4.94 - 78.94 )	19.74 ( 35.58 )
BODY TEMPERATURE ABNORMAL	INVESTIGATIONS	3	1.17 ( 0.37 - 3.7 )	1.17 ( 0.07 )
OPHTHALMIC VASCULAR THROMBOSIS	EYE DISORDERS	3	23.69 ( 5.66 - 99.13 )	23.69 ( 40.75 )
LISTLESS	PSYCHIATRIC DISORDERS	3	0.86 ( 0.28 - 2.71 )	0.86 ( 0.06 )
SPINAL IMPLANTATION	SURGICAL AND MEDICAL PROCEDURES	3	23.69 ( 5.66 - 99.13 )	23.69 ( 40.75 )
TOOTH EROSION	GASTROINTESTINAL DISORDERS	3	3.29 ( 1.01 - 10.68 )	3.29 ( 4.41 )
FAMILY STRESS	SOCIAL CIRCUMSTANCES	3	1.88 ( 0.59 - 5.99 )	1.88 ( 1.18 )
GASTRIC ULCER PERFORATION	GASTROINTESTINAL DISORDERS	3	0.99 ( 0.31 - 3.1 )	0.99 ( 0 )
DANDRUFF	SKIN AND SUBCUTANEOUS TISSUE DISORDERS	3	2.89 ( 0.89 - 9.33 )	2.89 ( 3.45 )
TONSILLAR HYPERTROPHY	RESPIRATORY, THORACIC AND MEDIASTINAL DISORDERS	3	1.3 ( 0.41 - 4.11 )	1.3 ( 0.2 )
OCCUPATIONAL EXPOSURE TO SUNLIGHT	INJURY, POISONING AND PROCEDURAL COMPLICATIONS	3	Inf ( NaN - Inf )	Inf ( 118.45 )
CARDIAC DISCOMFORT	CARDIAC DISORDERS	3	2.28 ( 0.71 - 7.29 )	2.28 ( 2.03 )
CARCINOID TUMOUR PULMONARY	NEOPLASMS BENIGN, MALIGNANT AND UNSPECIFIED (INCL CYSTS AND POLYPS)	3	5.64 ( 1.68 - 18.91 )	5.64 ( 10.02 )
STEVENS-JOHNSON SYNDROME	SKIN AND SUBCUTANEOUS TISSUE DISORDERS	3	0.39 ( 0.13 - 1.22 )	0.39 ( 2.82 )
DERMATITIS PSORIASIFORM	SKIN AND SUBCUTANEOUS TISSUE DISORDERS	3	0.53 ( 0.17 - 1.66 )	0.53 ( 1.23 )
MYCOPLASMA INFECTION	INFECTIONS AND INFESTATIONS	3	3.48 ( 1.07 - 11.34 )	3.48 ( 4.88 )
OBSTRUCTIVE SLEEP APNOEA SYNDROME	RESPIRATORY, THORACIC AND MEDIASTINAL DISORDERS	3	9.87 ( 2.79 - 34.98 )	9.87 ( 19.13 )
SARS-COV-2 TEST NEGATIVE	INVESTIGATIONS	3	0.97 ( 0.31 - 3.05 )	0.97 ( 0 )
MILIARIA	SKIN AND SUBCUTANEOUS TISSUE DISORDERS	3	1.08 ( 0.34 - 3.39 )	1.08 ( 0.02 )
BRAIN INJURY	NERVOUS SYSTEM DISORDERS	3	0.82 ( 0.26 - 2.56 )	0.82 ( 0.12 )
ADENOMA BENIGN	NEOPLASMS BENIGN, MALIGNANT AND UNSPECIFIED (INCL CYSTS AND POLYPS)	3	4.23 ( 1.29 - 13.92 )	4.23 ( 6.68 )
FALLOPIAN TUBE CANCER	NEOPLASMS BENIGN, MALIGNANT AND UNSPECIFIED (INCL CYSTS AND POLYPS)	3	8.46 ( 2.43 - 29.44 )	8.46 ( 16.25 )
TENSION	PSYCHIATRIC DISORDERS	3	1.21 ( 0.38 - 3.81 )	1.21 ( 0.1 )
TONSIL CANCER	NEOPLASMS BENIGN, MALIGNANT AND UNSPECIFIED (INCL CYSTS AND POLYPS)	3	1.58 ( 0.5 - 5.01 )	1.58 ( 0.61 )
BONE DEMINERALISATION	MUSCULOSKELETAL AND CONNECTIVE TISSUE DISORDERS	3	11.85 ( 3.26 - 43.04 )	11.84 ( 22.91 )
BENIGN BREAST NEOPLASM	NEOPLASMS BENIGN, MALIGNANT AND UNSPECIFIED (INCL CYSTS AND POLYPS)	3	0.78 ( 0.25 - 2.44 )	0.78 ( 0.18 )
RENAL COLIC	RENAL AND URINARY DISORDERS	3	0.82 ( 0.26 - 2.58 )	0.82 ( 0.11 )
THALAMUS HAEMORRHAGE	NERVOUS SYSTEM DISORDERS	3	5.64 ( 1.68 - 18.91 )	5.64 ( 10.02 )
BLOOD INSULIN INCREASED	INVESTIGATIONS	3	6.58 ( 1.94 - 22.34 )	6.58 ( 12.17 )
ARTHROSCOPY	INVESTIGATIONS	3	0.92 ( 0.29 - 2.88 )	0.92 ( 0.02 )
NASAL DISCHARGE DISCOLOURATION	RESPIRATORY, THORACIC AND MEDIASTINAL DISORDERS	3	0.64 ( 0.2 - 1.99 )	0.64 ( 0.61 )
NON-SMALL CELL LUNG CANCER	NEOPLASMS BENIGN, MALIGNANT AND UNSPECIFIED (INCL CYSTS AND POLYPS)	3	0.79 ( 0.25 - 2.49 )	0.79 ( 0.16 )
LEFT VENTRICULAR FAILURE	CARDIAC DISORDERS	3	0.72 ( 0.23 - 2.25 )	0.72 ( 0.33 )
GINGIVAL GRAFT	SURGICAL AND MEDICAL PROCEDURES	3	14.81 ( 3.93 - 55.81 )	14.81 ( 28.09 )
ISCHAEMIC CEREBRAL INFARCTION	NERVOUS SYSTEM DISORDERS	3	3.2 ( 0.99 - 10.38 )	3.2 ( 4.2 )
UTERINE INFECTION	INFECTIONS AND INFESTATIONS	3	1.79 ( 0.56 - 5.71 )	1.79 ( 1.01 )
PROCEDURAL SITE REACTION	INJURY, POISONING AND PROCEDURAL COMPLICATIONS	3	3.95 ( 1.2 - 12.94 )	3.95 ( 6 )
PULMONARY SEPSIS	INFECTIONS AND INFESTATIONS	3	1.13 ( 0.36 - 3.55 )	1.13 ( 0.04 )
FACTOR V LEIDEN MUTATION	CONGENITAL, FAMILIAL AND GENETIC DISORDERS	3	6.97 ( 2.04 - 23.78 )	6.97 ( 13.03 )
DRY GANGRENE	VASCULAR DISORDERS	3	4.08 ( 1.24 - 13.41 )	4.08 ( 6.33 )
INTERVERTEBRAL DISCITIS	INFECTIONS AND INFESTATIONS	3	0.46 ( 0.15 - 1.44 )	0.46 ( 1.87 )
SLEEP TERROR	PSYCHIATRIC DISORDERS	3	5.64 ( 1.68 - 18.91 )	5.64 ( 10.02 )
VASCULAR DEVICE INFECTION	INFECTIONS AND INFESTATIONS	3	6.97 ( 2.04 - 23.78 )	6.97 ( 13.03 )
DISEASE RECURRENCE	GENERAL DISORDERS AND ADMINISTRATION SITE CONDITIONS	3	0.12 ( 0.04 - 0.36 )	0.12 ( 20.2 )
MYOPERICARDITIS	CARDIAC DISORDERS	3	5.92 ( 1.76 - 19.93 )	5.92 ( 10.67 )
FAECAL CALPROTECTIN INCREASED	INVESTIGATIONS	3	3.82 ( 1.17 - 12.5 )	3.82 ( 5.7 )
HAEMATOTOXICITY	BLOOD AND LYMPHATIC SYSTEM DISORDERS	3	2.28 ( 0.71 - 7.29 )	2.28 ( 2.03 )
PNEUMONIA STREPTOCOCCAL	INFECTIONS AND INFESTATIONS	2	0.93 ( 0.23 - 3.78 )	0.93 ( 0.01 )
TRANSFUSION REACTION	INJURY, POISONING AND PROCEDURAL COMPLICATIONS	2	4.94 ( 1.13 - 21.47 )	4.94 ( 5.58 )
GENITAL BLISTER	REPRODUCTIVE SYSTEM AND BREAST DISORDERS	2	13.16 ( 2.66 - 65.21 )	13.16 ( 16.86 )
MUCOUS STOOLS	GASTROINTESTINAL DISORDERS	2	0.88 ( 0.22 - 3.56 )	0.88 ( 0.03 )
PNEUMONIA CRYPTOCOCCAL	INFECTIONS AND INFESTATIONS	2	0.54 ( 0.13 - 2.18 )	0.54 ( 0.77 )
SINUSITIS FUNGAL	INFECTIONS AND INFESTATIONS	2	2.55 ( 0.61 - 10.64 )	2.55 ( 1.77 )
INCOHERENT	NERVOUS SYSTEM DISORDERS	2	0.65 ( 0.16 - 2.64 )	0.65 ( 0.36 )
URETERIC STENOSIS	RENAL AND URINARY DISORDERS	2	2.26 ( 0.54 - 9.38 )	2.26 ( 1.32 )
BREAST RECONSTRUCTION	SURGICAL AND MEDICAL PROCEDURES	2	3.04 ( 0.72 - 12.8 )	3.04 ( 2.54 )
BONE LESION	MUSCULOSKELETAL AND CONNECTIVE TISSUE DISORDERS	2	0.93 ( 0.23 - 3.78 )	0.93 ( 0.01 )
OESOPHAGEAL RUPTURE	GASTROINTESTINAL DISORDERS	2	1.44 ( 0.35 - 5.89 )	1.44 ( 0.26 )
SOFT TISSUE SWELLING	MUSCULOSKELETAL AND CONNECTIVE TISSUE DISORDERS	2	0.99 ( 0.24 - 4.02 )	0.99 ( 0 )
PANCREATIC ENZYMES INCREASED	INVESTIGATIONS	2	3.29 ( 0.78 - 13.92 )	3.29 ( 2.94 )
HYPOPNOEA	RESPIRATORY, THORACIC AND MEDIASTINAL DISORDERS	2	1.52 ( 0.37 - 6.23 )	1.52 ( 0.34 )
NAIL BED BLEEDING	SKIN AND SUBCUTANEOUS TISSUE DISORDERS	2	1.68 ( 0.41 - 6.92 )	1.68 ( 0.53 )
URINARY BLADDER HAEMORRHAGE	RENAL AND URINARY DISORDERS	2	1.16 ( 0.28 - 4.74 )	1.16 ( 0.04 )
CEREBROSPINAL FLUID CIRCULATION DISORDER	NERVOUS SYSTEM DISORDERS	2	78.97 ( 7.16 - 870.92 )	78.97 ( 51.32 )
DUODENAL ULCER PERFORATION	GASTROINTESTINAL DISORDERS	2	0.02 ( 0.01 - 0.09 )	0.02 ( 86.1 )
RIGHT VENTRICULAR FAILURE	CARDIAC DISORDERS	2	0.95 ( 0.23 - 3.87 )	0.95 ( 0 )
POST PROCEDURAL FEVER	INJURY, POISONING AND PROCEDURAL COMPLICATIONS	2	4.94 ( 1.13 - 21.47 )	4.94 ( 5.58 )
HERPES DERMATITIS	INFECTIONS AND INFESTATIONS	2	5.26 ( 1.2 - 23.02 )	5.26 ( 6.1 )
VIRAL RASH	INFECTIONS AND INFESTATIONS	2	4.65 ( 1.07 - 20.11 )	4.65 ( 5.12 )
HYPERTENSIVE HEART DISEASE	CARDIAC DISORDERS	2	0.91 ( 0.22 - 3.69 )	0.91 ( 0.02 )
SENSORIMOTOR DISORDER	NERVOUS SYSTEM DISORDERS	2	13.16 ( 2.66 - 65.21 )	13.16 ( 16.86 )
SINUS POLYP	RESPIRATORY, THORACIC AND MEDIASTINAL DISORDERS	2	1.61 ( 0.39 - 6.63 )	1.61 ( 0.45 )
[truncated: 2,232 more rows]

## Sheet: Sheet2
								Journal name:Naunyn-Schmiedeberg's Archives of Pharmacology
								Article title:Systematic analysis of adverse reaction signals induced by Leflunomide, Upadacitinib, and Baricitinib in the treatment of rheumatoid arthritis using the FAERS database
								Author names:Jizheng Danga,Li Shua*
								aDepartment of Pharmacy, University-Town Hospital of Chongqing Medical University, Chongqing, China
								E-mail addresses: 800321@hospital.cqmu.edu.cn (Jizheng Dang), shuli1986@hospital.cqmu.edu.cn (Li Shu).
								Corresponding Author:Li Shu
								E-mail addresses:shuli1986@hospital.cqmu.edu.cn
