# Supplementary material for: Systematic analysis of adverse reaction signals induced by Leflunomide, Upadacitinib, and Baricitinib in the treatment of rheumatoid arthritis using the FAERS database
Source: Research Square preprint supplement (doi:10.21203/rs.3.rs-7331453/v1), 2025-08-21
Supplement: Supplementary file 6 [file 8c8b4d5b089a3fb8b9538b53.xlsx]

## Sheet: Sheet1
pt_name	soc_name	Case number	ROR(95%Cl)	PRR(χ2)
DRUG INEFFECTIVE	GENERAL DISORDERS AND ADMINISTRATION SITE CONDITIONS	111	0.63 ( 0.52 - 0.76 )	0.64 ( 23.9 )
THERAPY INTERRUPTED	SURGICAL AND MEDICAL PROCEDURES	93	5.83 ( 4.75 - 7.16 )	5.75 ( 362.59 )
COVID-19	INFECTIONS AND INFESTATIONS	90	3.97 ( 3.22 - 4.9 )	3.92 ( 195.7 )
PULMONARY EMBOLISM	RESPIRATORY, THORACIC AND MEDIASTINAL DISORDERS	84	15.69 ( 12.61 - 19.51 )	15.47 ( 1109.33 )
RHEUMATOID ARTHRITIS	MUSCULOSKELETAL AND CONNECTIVE TISSUE DISORDERS	84	0.64 ( 0.52 - 0.8 )	0.65 ( 16.15 )
HERPES ZOSTER	INFECTIONS AND INFESTATIONS	65	3.99 ( 3.13 - 5.11 )	3.96 ( 143.28 )
PNEUMONIA	INFECTIONS AND INFESTATIONS	62	1.39 ( 1.08 - 1.79 )	1.39 ( 6.78 )
FALL	INJURY, POISONING AND PROCEDURAL COMPLICATIONS	60	1.64 ( 1.27 - 2.12 )	1.64 ( 14.95 )
URINARY TRACT INFECTION	INFECTIONS AND INFESTATIONS	58	2.12 ( 1.64 - 2.75 )	2.11 ( 34.04 )
DEEP VEIN THROMBOSIS	VASCULAR DISORDERS	52	15.82 ( 12 - 20.86 )	15.68 ( 696.94 )
HEADACHE	NERVOUS SYSTEM DISORDERS	51	0.86 ( 0.65 - 1.13 )	0.86 ( 1.16 )
INTERSTITIAL LUNG DISEASE	RESPIRATORY, THORACIC AND MEDIASTINAL DISORDERS	48	6.24 ( 4.69 - 8.3 )	6.19 ( 207.05 )
NAUSEA	GASTROINTESTINAL DISORDERS	48	0.96 ( 0.72 - 1.27 )	0.96 ( 0.1 )
INFECTION	INFECTIONS AND INFESTATIONS	47	1.44 ( 1.08 - 1.92 )	1.44 ( 6.32 )
THERAPY CESSATION	SURGICAL AND MEDICAL PROCEDURES	47	8.82 ( 6.6 - 11.78 )	8.75 ( 318.44 )
DYSPNOEA	RESPIRATORY, THORACIC AND MEDIASTINAL DISORDERS	46	1.28 ( 0.96 - 1.71 )	1.28 ( 2.74 )
PYREXIA	GENERAL DISORDERS AND ADMINISTRATION SITE CONDITIONS	45	1.37 ( 1.02 - 1.84 )	1.37 ( 4.54 )
DEATH	GENERAL DISORDERS AND ADMINISTRATION SITE CONDITIONS	44	1.77 ( 1.31 - 2.38 )	1.76 ( 14.53 )
DIZZINESS	NERVOUS SYSTEM DISORDERS	43	1.52 ( 1.12 - 2.05 )	1.51 ( 7.5 )
PAIN	GENERAL DISORDERS AND ADMINISTRATION SITE CONDITIONS	42	0.36 ( 0.27 - 0.49 )	0.37 ( 46.2 )
DIARRHOEA	GASTROINTESTINAL DISORDERS	39	1.04 ( 0.76 - 1.43 )	1.04 ( 0.07 )
MALAISE	GENERAL DISORDERS AND ADMINISTRATION SITE CONDITIONS	38	0.8 ( 0.58 - 1.1 )	0.8 ( 1.84 )
ARTHRALGIA	MUSCULOSKELETAL AND CONNECTIVE TISSUE DISORDERS	37	0.3 ( 0.21 - 0.41 )	0.3 ( 61.86 )
ANAEMIA	BLOOD AND LYMPHATIC SYSTEM DISORDERS	36	3.52 ( 2.54 - 4.89 )	3.51 ( 64.23 )
SINUSITIS	INFECTIONS AND INFESTATIONS	36	1.02 ( 0.73 - 1.41 )	1.02 ( 0.01 )
VOMITING	GASTROINTESTINAL DISORDERS	34	1.23 ( 0.88 - 1.72 )	1.23 ( 1.44 )
CELLULITIS	INFECTIONS AND INFESTATIONS	34	4.06 ( 2.9 - 5.7 )	4.04 ( 77.44 )
DIVERTICULITIS	INFECTIONS AND INFESTATIONS	33	4.64 ( 3.29 - 6.54 )	4.62 ( 92.97 )
NEOPLASM MALIGNANT	NEOPLASMS BENIGN, MALIGNANT AND UNSPECIFIED (INCL CYSTS AND POLYPS)	33	5.49 ( 3.89 - 7.74 )	5.46 ( 119.28 )
BREAST CANCER	NEOPLASMS BENIGN, MALIGNANT AND UNSPECIFIED (INCL CYSTS AND POLYPS)	31	5.2 ( 3.64 - 7.41 )	5.17 ( 103.54 )
FATIGUE	GENERAL DISORDERS AND ADMINISTRATION SITE CONDITIONS	30	0.41 ( 0.29 - 0.59 )	0.41 ( 25.35 )
ABDOMINAL PAIN UPPER	GASTROINTESTINAL DISORDERS	29	1.79 ( 1.24 - 2.58 )	1.78 ( 9.99 )
PAIN IN EXTREMITY	MUSCULOSKELETAL AND CONNECTIVE TISSUE DISORDERS	29	0.44 ( 0.31 - 0.64 )	0.45 ( 19.97 )
MYOCARDIAL INFARCTION	CARDIAC DISORDERS	29	2.53 ( 1.76 - 3.65 )	2.53 ( 26.68 )
HYPERTENSION	VASCULAR DISORDERS	27	1.22 ( 0.83 - 1.78 )	1.22 ( 1.04 )
CEREBROVASCULAR ACCIDENT	NERVOUS SYSTEM DISORDERS	26	2.61 ( 1.77 - 3.84 )	2.6 ( 25.56 )
ILLNESS	GENERAL DISORDERS AND ADMINISTRATION SITE CONDITIONS	26	2.27 ( 1.55 - 3.34 )	2.27 ( 18.38 )
SEPSIS	INFECTIONS AND INFESTATIONS	25	2.55 ( 1.72 - 3.79 )	2.55 ( 23.43 )
PNEUMOCYSTIS JIROVECII PNEUMONIA	INFECTIONS AND INFESTATIONS	25	14.45 ( 9.71 - 21.51 )	14.39 ( 304.4 )
NASOPHARYNGITIS	INFECTIONS AND INFESTATIONS	25	0.53 ( 0.36 - 0.79 )	0.54 ( 10.06 )
WEIGHT INCREASED	INVESTIGATIONS	25	1.12 ( 0.75 - 1.66 )	1.12 ( 0.31 )
PERIPHERAL SWELLING	GENERAL DISORDERS AND ADMINISTRATION SITE CONDITIONS	23	0.61 ( 0.41 - 0.92 )	0.62 ( 5.55 )
INFLUENZA	INFECTIONS AND INFESTATIONS	21	0.96 ( 0.63 - 1.48 )	0.96 ( 0.03 )
ABDOMINAL PAIN	GASTROINTESTINAL DISORDERS	21	1.55 ( 1.01 - 2.39 )	1.55 ( 4.13 )
CONSTIPATION	GASTROINTESTINAL DISORDERS	20	3.08 ( 1.98 - 4.78 )	3.07 ( 27.85 )
COUGH	RESPIRATORY, THORACIC AND MEDIASTINAL DISORDERS	18	0.52 ( 0.33 - 0.83 )	0.53 ( 7.72 )
CONDITION AGGRAVATED	GENERAL DISORDERS AND ADMINISTRATION SITE CONDITIONS	18	0.41 ( 0.26 - 0.66 )	0.42 ( 14.84 )
RASH	SKIN AND SUBCUTANEOUS TISSUE DISORDERS	18	0.39 ( 0.25 - 0.62 )	0.39 ( 16.82 )
BRONCHITIS	INFECTIONS AND INFESTATIONS	18	0.96 ( 0.6 - 1.53 )	0.96 ( 0.03 )
CHEST PAIN	GENERAL DISORDERS AND ADMINISTRATION SITE CONDITIONS	18	1.2 ( 0.75 - 1.9 )	1.2 ( 0.59 )
BLOOD CHOLESTEROL INCREASED	INVESTIGATIONS	18	1.75 ( 1.1 - 2.78 )	1.75 ( 5.76 )
LUNG NEOPLASM MALIGNANT	NEOPLASMS BENIGN, MALIGNANT AND UNSPECIFIED (INCL CYSTS AND POLYPS)	17	4.11 ( 2.55 - 6.62 )	4.1 ( 39.56 )
TRANSIENT ISCHAEMIC ATTACK	NERVOUS SYSTEM DISORDERS	17	7.13 ( 4.42 - 11.51 )	7.11 ( 88.26 )
LOSS OF CONSCIOUSNESS	NERVOUS SYSTEM DISORDERS	16	2.23 ( 1.36 - 3.64 )	2.22 ( 10.73 )
ASTHENIA	GENERAL DISORDERS AND ADMINISTRATION SITE CONDITIONS	16	0.64 ( 0.39 - 1.05 )	0.64 ( 3.14 )
RESPIRATORY FAILURE	RESPIRATORY, THORACIC AND MEDIASTINAL DISORDERS	15	3.73 ( 2.24 - 6.19 )	3.72 ( 29.65 )
LUNG DISORDER	RESPIRATORY, THORACIC AND MEDIASTINAL DISORDERS	15	1.72 ( 1.03 - 2.85 )	1.71 ( 4.45 )
ATRIAL FIBRILLATION	CARDIAC DISORDERS	15	2.34 ( 1.41 - 3.89 )	2.34 ( 11.45 )
GASTROENTERITIS	INFECTIONS AND INFESTATIONS	15	8.34 ( 5.01 - 13.89 )	8.32 ( 95.3 )
COVID-19 PNEUMONIA	INFECTIONS AND INFESTATIONS	15	11.42 ( 6.85 - 19.05 )	11.39 ( 139.64 )
ACUTE KIDNEY INJURY	RENAL AND URINARY DISORDERS	14	4.67 ( 2.76 - 7.91 )	4.66 ( 40 )
UPPER RESPIRATORY TRACT INFECTION	INFECTIONS AND INFESTATIONS	14	1.21 ( 0.72 - 2.05 )	1.21 ( 0.53 )
VIRAL INFECTION	INFECTIONS AND INFESTATIONS	14	3.03 ( 1.79 - 5.12 )	3.02 ( 18.89 )
HOSPITALISATION	SURGICAL AND MEDICAL PROCEDURES	13	1.98 ( 1.15 - 3.41 )	1.98 ( 6.25 )
GAIT DISTURBANCE	GENERAL DISORDERS AND ADMINISTRATION SITE CONDITIONS	13	0.5 ( 0.29 - 0.86 )	0.5 ( 6.54 )
ALOPECIA	SKIN AND SUBCUTANEOUS TISSUE DISORDERS	13	0.45 ( 0.26 - 0.78 )	0.45 ( 8.59 )
JOINT SWELLING	MUSCULOSKELETAL AND CONNECTIVE TISSUE DISORDERS	13	0.2 ( 0.11 - 0.34 )	0.2 ( 42.48 )
RENAL IMPAIRMENT	RENAL AND URINARY DISORDERS	13	3.15 ( 1.82 - 5.43 )	3.14 ( 18.9 )
CONTUSION	INJURY, POISONING AND PROCEDURAL COMPLICATIONS	12	0.73 ( 0.41 - 1.28 )	0.73 ( 1.24 )
OEDEMA PERIPHERAL	GENERAL DISORDERS AND ADMINISTRATION SITE CONDITIONS	12	0.91 ( 0.52 - 1.61 )	0.91 ( 0.1 )
WEIGHT DECREASED	INVESTIGATIONS	12	0.54 ( 0.31 - 0.96 )	0.55 ( 4.55 )
HYPERSENSITIVITY	IMMUNE SYSTEM DISORDERS	12	0.46 ( 0.26 - 0.81 )	0.46 ( 7.73 )
MUSCULOSKELETAL STIFFNESS	MUSCULOSKELETAL AND CONNECTIVE TISSUE DISORDERS	12	0.37 ( 0.21 - 0.66 )	0.38 ( 12.49 )
SURGERY	SURGICAL AND MEDICAL PROCEDURES	12	1.19 ( 0.68 - 2.1 )	1.19 ( 0.37 )
HAEMOGLOBIN DECREASED	INVESTIGATIONS	12	2.42 ( 1.37 - 4.27 )	2.42 ( 9.92 )
THROMBOSIS	VASCULAR DISORDERS	12	1.91 ( 1.09 - 3.38 )	1.91 ( 5.22 )
LEUKOPENIA	BLOOD AND LYMPHATIC SYSTEM DISORDERS	11	3.26 ( 1.8 - 5.9 )	3.25 ( 17.09 )
ACUTE MYOCARDIAL INFARCTION	CARDIAC DISORDERS	11	6.48 ( 3.57 - 11.74 )	6.47 ( 50.33 )
VISUAL IMPAIRMENT	EYE DISORDERS	11	1.36 ( 0.75 - 2.46 )	1.36 ( 1.05 )
ALANINE AMINOTRANSFERASE INCREASED	INVESTIGATIONS	11	2.64 ( 1.46 - 4.78 )	2.64 ( 11.14 )
THROMBOPHLEBITIS	VASCULAR DISORDERS	11	34.67 ( 18.87 - 63.69 )	34.6 ( 339.49 )
PRURITUS	SKIN AND SUBCUTANEOUS TISSUE DISORDERS	11	0.41 ( 0.23 - 0.74 )	0.41 ( 9.41 )
PARAESTHESIA	NERVOUS SYSTEM DISORDERS	11	0.87 ( 0.48 - 1.57 )	0.87 ( 0.22 )
CARDIAC FAILURE	CARDIAC DISORDERS	11	2.52 ( 1.39 - 4.56 )	2.52 ( 10.03 )
PNEUMONIA BACTERIAL	INFECTIONS AND INFESTATIONS	11	10.24 ( 5.64 - 18.59 )	10.22 ( 89.99 )
CEREBRAL INFARCTION	NERVOUS SYSTEM DISORDERS	11	9.27 ( 5.11 - 16.82 )	9.25 ( 79.76 )
ORAL HERPES	INFECTIONS AND INFESTATIONS	11	3.12 ( 1.72 - 5.64 )	3.11 ( 15.72 )
ISCHAEMIC STROKE	NERVOUS SYSTEM DISORDERS	11	15.96 ( 8.77 - 29.06 )	15.93 ( 149.99 )
INAPPROPRIATE SCHEDULE OF PRODUCT ADMINISTRATION	INJURY, POISONING AND PROCEDURAL COMPLICATIONS	11	1.73 ( 0.96 - 3.13 )	1.73 ( 3.39 )
HEPATIC ENZYME INCREASED	INVESTIGATIONS	11	0.59 ( 0.33 - 1.07 )	0.6 ( 3.03 )
PANCYTOPENIA	BLOOD AND LYMPHATIC SYSTEM DISORDERS	10	1.99 ( 1.07 - 3.71 )	1.99 ( 4.9 )
C-REACTIVE PROTEIN INCREASED	INVESTIGATIONS	10	1.05 ( 0.57 - 1.96 )	1.05 ( 0.03 )
STOMATITIS	GASTROINTESTINAL DISORDERS	10	0.93 ( 0.5 - 1.73 )	0.93 ( 0.05 )
SEPTIC SHOCK	INFECTIONS AND INFESTATIONS	10	3.17 ( 1.7 - 5.91 )	3.17 ( 14.79 )
MUSCLE SPASMS	MUSCULOSKELETAL AND CONNECTIVE TISSUE DISORDERS	10	0.88 ( 0.48 - 1.65 )	0.88 ( 0.15 )
ACNE	SKIN AND SUBCUTANEOUS TISSUE DISORDERS	10	3.16 ( 1.7 - 5.89 )	3.16 ( 14.68 )
GASTROINTESTINAL DISORDER	GASTROINTESTINAL DISORDERS	10	0.83 ( 0.45 - 1.55 )	0.83 ( 0.34 )
LOWER RESPIRATORY TRACT INFECTION	INFECTIONS AND INFESTATIONS	10	0.65 ( 0.35 - 1.21 )	0.65 ( 1.86 )
CHRONIC OBSTRUCTIVE PULMONARY DISEASE	RESPIRATORY, THORACIC AND MEDIASTINAL DISORDERS	10	1.84 ( 0.99 - 3.43 )	1.84 ( 3.82 )
PLEURAL EFFUSION	RESPIRATORY, THORACIC AND MEDIASTINAL DISORDERS	10	2.17 ( 1.17 - 4.04 )	2.17 ( 6.29 )
SYNCOPE	NERVOUS SYSTEM DISORDERS	10	2.29 ( 1.23 - 4.26 )	2.29 ( 7.22 )
BLISTER	SKIN AND SUBCUTANEOUS TISSUE DISORDERS	10	0.96 ( 0.51 - 1.78 )	0.96 ( 0.02 )
LOCALISED INFECTION	INFECTIONS AND INFESTATIONS	10	1.3 ( 0.7 - 2.41 )	1.29 ( 0.67 )
EAR INFECTION	INFECTIONS AND INFESTATIONS	10	1.5 ( 0.81 - 2.79 )	1.5 ( 1.65 )
NEUTROPENIA	BLOOD AND LYMPHATIC SYSTEM DISORDERS	9	2.67 ( 1.39 - 5.15 )	2.67 ( 9.36 )
DEPRESSION	PSYCHIATRIC DISORDERS	9	0.65 ( 0.34 - 1.25 )	0.65 ( 1.72 )
HYPOAESTHESIA	NERVOUS SYSTEM DISORDERS	9	0.52 ( 0.27 - 1.01 )	0.52 ( 3.91 )
STAPHYLOCOCCAL INFECTION	INFECTIONS AND INFESTATIONS	9	1.6 ( 0.83 - 3.09 )	1.6 ( 2.03 )
DRUG INTERACTION	GENERAL DISORDERS AND ADMINISTRATION SITE CONDITIONS	9	2.12 ( 1.1 - 4.08 )	2.12 ( 5.3 )
OPHTHALMIC HERPES ZOSTER	INFECTIONS AND INFESTATIONS	9	24.63 ( 12.64 - 47.99 )	24.59 ( 195.75 )
CONFUSIONAL STATE	PSYCHIATRIC DISORDERS	9	0.95 ( 0.49 - 1.82 )	0.95 ( 0.03 )
EMBOLISM	VASCULAR DISORDERS	9	24.19 ( 12.42 - 47.13 )	24.16 ( 192.11 )
METASTASES TO LIVER	NEOPLASMS BENIGN, MALIGNANT AND UNSPECIFIED (INCL CYSTS AND POLYPS)	9	11.81 ( 6.1 - 22.85 )	11.79 ( 87.19 )
ANXIETY	PSYCHIATRIC DISORDERS	9	0.77 ( 0.4 - 1.49 )	0.77 ( 0.59 )
CYSTITIS	INFECTIONS AND INFESTATIONS	9	1.34 ( 0.7 - 2.59 )	1.34 ( 0.79 )
NEPHROLITHIASIS	RENAL AND URINARY DISORDERS	9	1.46 ( 0.76 - 2.81 )	1.46 ( 1.31 )
ARTHRITIS	MUSCULOSKELETAL AND CONNECTIVE TISSUE DISORDERS	9	0.42 ( 0.22 - 0.82 )	0.43 ( 6.99 )
ADENOCARCINOMA OF COLON	NEOPLASMS BENIGN, MALIGNANT AND UNSPECIFIED (INCL CYSTS AND POLYPS)	9	40.93 ( 20.83 - 80.44 )	40.87 ( 327.85 )
MIGRAINE	NERVOUS SYSTEM DISORDERS	9	1.13 ( 0.59 - 2.17 )	1.13 ( 0.13 )
GASTROOESOPHAGEAL REFLUX DISEASE	GASTROINTESTINAL DISORDERS	9	1.64 ( 0.85 - 3.16 )	1.64 ( 2.26 )
GENERAL PHYSICAL HEALTH DETERIORATION	GENERAL DISORDERS AND ADMINISTRATION SITE CONDITIONS	9	0.89 ( 0.46 - 1.72 )	0.89 ( 0.11 )
HIP FRACTURE	INJURY, POISONING AND PROCEDURAL COMPLICATIONS	9	2.33 ( 1.21 - 4.49 )	2.33 ( 6.79 )
RED BLOOD CELL SEDIMENTATION RATE INCREASED	INVESTIGATIONS	8	1.27 ( 0.63 - 2.54 )	1.27 ( 0.45 )
URTICARIA	SKIN AND SUBCUTANEOUS TISSUE DISORDERS	8	0.54 ( 0.27 - 1.09 )	0.54 ( 3.07 )
BACK PAIN	MUSCULOSKELETAL AND CONNECTIVE TISSUE DISORDERS	8	0.28 ( 0.14 - 0.56 )	0.28 ( 14.57 )
BLOOD PRESSURE INCREASED	INVESTIGATIONS	8	0.55 ( 0.28 - 1.11 )	0.55 ( 2.89 )
SOMNOLENCE	NERVOUS SYSTEM DISORDERS	8	1.26 ( 0.63 - 2.52 )	1.26 ( 0.42 )
OROPHARYNGEAL PAIN	RESPIRATORY, THORACIC AND MEDIASTINAL DISORDERS	8	0.51 ( 0.26 - 1.03 )	0.51 ( 3.68 )
SWELLING	GENERAL DISORDERS AND ADMINISTRATION SITE CONDITIONS	8	0.3 ( 0.15 - 0.6 )	0.3 ( 13.1 )
PALPITATIONS	CARDIAC DISORDERS	8	1.48 ( 0.74 - 2.97 )	1.48 ( 1.25 )
DECREASED APPETITE	METABOLISM AND NUTRITION DISORDERS	8	0.69 ( 0.35 - 1.39 )	0.7 ( 1.07 )
WHITE BLOOD CELL COUNT DECREASED	INVESTIGATIONS	8	1.26 ( 0.63 - 2.52 )	1.26 ( 0.42 )
MENINGITIS	INFECTIONS AND INFESTATIONS	8	10.49 ( 5.21 - 21.12 )	10.48 ( 67.44 )
FUNGAL INFECTION	INFECTIONS AND INFESTATIONS	8	1.68 ( 0.84 - 3.36 )	1.68 ( 2.19 )
THERAPY NON-RESPONDER	GENERAL DISORDERS AND ADMINISTRATION SITE CONDITIONS	8	1.52 ( 0.76 - 3.05 )	1.52 ( 1.44 )
ORGANISING PNEUMONIA	RESPIRATORY, THORACIC AND MEDIASTINAL DISORDERS	8	12.5 ( 6.2 - 25.19 )	12.48 ( 82.81 )
PROSTATE CANCER	NEOPLASMS BENIGN, MALIGNANT AND UNSPECIFIED (INCL CYSTS AND POLYPS)	8	4.12 ( 2.06 - 8.27 )	4.12 ( 18.77 )
DIVERTICULITIS INTESTINAL PERFORATED	INFECTIONS AND INFESTATIONS	8	161.28 ( 73.9 - 351.94 )	161.05 ( 1004.55 )
POST HERPETIC NEURALGIA	NERVOUS SYSTEM DISORDERS	7	26.45 ( 12.4 - 56.41 )	26.42 ( 164.05 )
FEELING ABNORMAL	GENERAL DISORDERS AND ADMINISTRATION SITE CONDITIONS	7	0.47 ( 0.22 - 0.99 )	0.47 ( 4.17 )
HYPOTENSION	VASCULAR DISORDERS	7	0.94 ( 0.45 - 1.97 )	0.94 ( 0.03 )
PYELONEPHRITIS	INFECTIONS AND INFESTATIONS	7	6.12 ( 2.9 - 12.88 )	6.11 ( 29.62 )
POLLAKIURIA	RENAL AND URINARY DISORDERS	7	3.07 ( 1.46 - 6.47 )	3.07 ( 9.74 )
ABDOMINAL DISCOMFORT	GASTROINTESTINAL DISORDERS	7	0.27 ( 0.13 - 0.57 )	0.27 ( 13.53 )
FEMUR FRACTURE	INJURY, POISONING AND PROCEDURAL COMPLICATIONS	7	1.82 ( 0.87 - 3.83 )	1.82 ( 2.6 )
ADVERSE DRUG REACTION	GENERAL DISORDERS AND ADMINISTRATION SITE CONDITIONS	7	0.95 ( 0.45 - 2 )	0.95 ( 0.02 )
HEPATOCELLULAR INJURY	HEPATOBILIARY DISORDERS	7	15.85 ( 7.48 - 33.59 )	15.83 ( 94.8 )
SINUS DISORDER	RESPIRATORY, THORACIC AND MEDIASTINAL DISORDERS	7	2.14 ( 1.02 - 4.5 )	2.14 ( 4.24 )
INTENTIONAL DOSE OMISSION	INJURY, POISONING AND PROCEDURAL COMPLICATIONS	7	1.8 ( 0.86 - 3.78 )	1.8 ( 2.49 )
HYPERHIDROSIS	SKIN AND SUBCUTANEOUS TISSUE DISORDERS	7	0.92 ( 0.44 - 1.93 )	0.92 ( 0.05 )
DYSPHAGIA	GASTROINTESTINAL DISORDERS	7	2 ( 0.95 - 4.21 )	2 ( 3.51 )
THROMBOCYTOSIS	BLOOD AND LYMPHATIC SYSTEM DISORDERS	7	30.67 ( 14.35 - 65.57 )	30.63 ( 190.99 )
MYALGIA	MUSCULOSKELETAL AND CONNECTIVE TISSUE DISORDERS	7	0.82 ( 0.39 - 1.71 )	0.82 ( 0.29 )
INSOMNIA	PSYCHIATRIC DISORDERS	7	0.43 ( 0.21 - 0.91 )	0.44 ( 5.15 )
PRODUCTIVE COUGH	RESPIRATORY, THORACIC AND MEDIASTINAL DISORDERS	7	1.09 ( 0.52 - 2.29 )	1.09 ( 0.05 )
COLITIS	GASTROINTESTINAL DISORDERS	7	2.77 ( 1.32 - 5.81 )	2.76 ( 7.84 )
RESPIRATORY TRACT INFECTION	INFECTIONS AND INFESTATIONS	7	1.59 ( 0.76 - 3.34 )	1.59 ( 1.53 )
THROMBOCYTOPENIA	BLOOD AND LYMPHATIC SYSTEM DISORDERS	7	1.97 ( 0.94 - 4.14 )	1.97 ( 3.33 )
HYPERCHOLESTEROLAEMIA	METABOLISM AND NUTRITION DISORDERS	7	3.57 ( 1.7 - 7.5 )	3.56 ( 12.84 )
LYMPHOPENIA	BLOOD AND LYMPHATIC SYSTEM DISORDERS	7	12.98 ( 6.14 - 27.46 )	12.97 ( 75.7 )
INFLAMMATION	GENERAL DISORDERS AND ADMINISTRATION SITE CONDITIONS	7	0.45 ( 0.22 - 0.95 )	0.45 ( 4.59 )
LIVER FUNCTION TEST INCREASED	INVESTIGATIONS	7	1.52 ( 0.72 - 3.18 )	1.51 ( 1.22 )
DIFFUSE LARGE B-CELL LYMPHOMA	NEOPLASMS BENIGN, MALIGNANT AND UNSPECIFIED (INCL CYSTS AND POLYPS)	7	5.27 ( 2.5 - 11.1 )	5.26 ( 23.98 )
SPINAL COMPRESSION FRACTURE	INJURY, POISONING AND PROCEDURAL COMPLICATIONS	7	5.02 ( 2.38 - 10.57 )	5.01 ( 22.32 )
ARTHRITIS BACTERIAL	INFECTIONS AND INFESTATIONS	7	4.39 ( 2.09 - 9.24 )	4.39 ( 18.17 )
DIVERTICULAR PERFORATION	GASTROINTESTINAL DISORDERS	7	12.79 ( 6.05 - 27.04 )	12.77 ( 74.38 )
RETINAL VEIN OCCLUSION	EYE DISORDERS	7	50.39 ( 23.3 - 108.99 )	50.33 ( 312.4 )
PULMONARY FIBROSIS	RESPIRATORY, THORACIC AND MEDIASTINAL DISORDERS	7	1.03 ( 0.49 - 2.16 )	1.03 ( 0.01 )
CARDIAC DISORDER	CARDIAC DISORDERS	7	1.14 ( 0.54 - 2.4 )	1.14 ( 0.12 )
PRODUCT DOSE OMISSION ISSUE	INJURY, POISONING AND PROCEDURAL COMPLICATIONS	7	0.53 ( 0.25 - 1.12 )	0.53 ( 2.87 )
MALIGNANT MELANOMA	NEOPLASMS BENIGN, MALIGNANT AND UNSPECIFIED (INCL CYSTS AND POLYPS)	7	2.95 ( 1.4 - 6.19 )	2.94 ( 8.95 )
LUNG ADENOCARCINOMA	NEOPLASMS BENIGN, MALIGNANT AND UNSPECIFIED (INCL CYSTS AND POLYPS)	7	10.63 ( 5.03 - 22.46 )	10.62 ( 59.96 )
ACUTE RESPIRATORY DISTRESS SYNDROME	RESPIRATORY, THORACIC AND MEDIASTINAL DISORDERS	6	5.59 ( 2.5 - 12.49 )	5.58 ( 22.37 )
PELVIC FRACTURE	INJURY, POISONING AND PROCEDURAL COMPLICATIONS	6	3.98 ( 1.78 - 8.89 )	3.98 ( 13.29 )
MEMORY IMPAIRMENT	NERVOUS SYSTEM DISORDERS	6	0.57 ( 0.26 - 1.27 )	0.57 ( 1.92 )
ASTHMA	RESPIRATORY, THORACIC AND MEDIASTINAL DISORDERS	6	0.72 ( 0.32 - 1.61 )	0.72 ( 0.63 )
DEHYDRATION	METABOLISM AND NUTRITION DISORDERS	6	1.04 ( 0.47 - 2.31 )	1.04 ( 0.01 )
TOOTH INFECTION	INFECTIONS AND INFESTATIONS	6	1.46 ( 0.65 - 3.25 )	1.46 ( 0.87 )
HEPATIC STEATOSIS	HEPATOBILIARY DISORDERS	6	2.29 ( 1.03 - 5.1 )	2.28 ( 4.32 )
HEPATIC FUNCTION ABNORMAL	HEPATOBILIARY DISORDERS	6	4.07 ( 1.82 - 9.08 )	4.06 ( 13.76 )
INTERVERTEBRAL DISCITIS	INFECTIONS AND INFESTATIONS	6	14.28 ( 6.35 - 32.1 )	14.27 ( 72.31 )
GASTROENTERITIS VIRAL	INFECTIONS AND INFESTATIONS	6	2.05 ( 0.92 - 4.58 )	2.05 ( 3.22 )
ANTIBIOTIC THERAPY	SURGICAL AND MEDICAL PROCEDURES	6	10.51 ( 4.69 - 23.57 )	10.5 ( 50.71 )
PSORIASIS	SKIN AND SUBCUTANEOUS TISSUE DISORDERS	6	0.6 ( 0.27 - 1.34 )	0.6 ( 1.59 )
KIDNEY INFECTION	INFECTIONS AND INFESTATIONS	6	1.38 ( 0.62 - 3.08 )	1.38 ( 0.63 )
SQUAMOUS CELL CARCINOMA	NEOPLASMS BENIGN, MALIGNANT AND UNSPECIFIED (INCL CYSTS AND POLYPS)	6	3.9 ( 1.75 - 8.72 )	3.9 ( 12.86 )
PORTAL VEIN THROMBOSIS	HEPATOBILIARY DISORDERS	6	62.54 ( 26.97 - 145.01 )	62.47 ( 328.92 )
HALLUCINATION	PSYCHIATRIC DISORDERS	6	6.29 ( 2.81 - 14.06 )	6.28 ( 26.37 )
PNEUMONIA ASPIRATION	INFECTIONS AND INFESTATIONS	6	6.67 ( 2.98 - 14.91 )	6.66 ( 28.56 )
SUDDEN DEATH	GENERAL DISORDERS AND ADMINISTRATION SITE CONDITIONS	6	14.74 ( 6.56 - 33.15 )	14.73 ( 74.96 )
SEIZURE	NERVOUS SYSTEM DISORDERS	6	2.19 ( 0.98 - 4.89 )	2.19 ( 3.86 )
BLOOD CREATINE PHOSPHOKINASE INCREASED	INVESTIGATIONS	6	9.3 ( 4.15 - 20.84 )	9.29 ( 43.72 )
LIVER DISORDER	HEPATOBILIARY DISORDERS	6	0.94 ( 0.42 - 2.1 )	0.94 ( 0.02 )
MOBILITY DECREASED	MUSCULOSKELETAL AND CONNECTIVE TISSUE DISORDERS	6	0.28 ( 0.13 - 0.63 )	0.28 ( 10.94 )
STRESS	PSYCHIATRIC DISORDERS	6	0.82 ( 0.37 - 1.82 )	0.82 ( 0.25 )
GAMMA-GLUTAMYLTRANSFERASE INCREASED	INVESTIGATIONS	6	5.78 ( 2.59 - 12.93 )	5.78 ( 23.49 )
LYMPHOMA	NEOPLASMS BENIGN, MALIGNANT AND UNSPECIFIED (INCL CYSTS AND POLYPS)	6	1.88 ( 0.84 - 4.2 )	1.88 ( 2.48 )
ARTHROPATHY	MUSCULOSKELETAL AND CONNECTIVE TISSUE DISORDERS	6	0.2 ( 0.09 - 0.45 )	0.2 ( 18.99 )
CHILLS	GENERAL DISORDERS AND ADMINISTRATION SITE CONDITIONS	6	0.66 ( 0.3 - 1.48 )	0.66 ( 1.03 )
ADENOCARCINOMA GASTRIC	NEOPLASMS BENIGN, MALIGNANT AND UNSPECIFIED (INCL CYSTS AND POLYPS)	6	75.57 ( 32.33 - 176.65 )	75.49 ( 392.02 )
RENAL FAILURE	RENAL AND URINARY DISORDERS	6	0.97 ( 0.44 - 2.16 )	0.97 ( 0.01 )
OFF LABEL USE	INJURY, POISONING AND PROCEDURAL COMPLICATIONS	6	0.14 ( 0.06 - 0.31 )	0.14 ( 32.05 )
HERPES ZOSTER DISSEMINATED	INFECTIONS AND INFESTATIONS	5	42.57 ( 17.18 - 105.46 )	42.53 ( 189.43 )
RASH ERYTHEMATOUS	SKIN AND SUBCUTANEOUS TISSUE DISORDERS	5	1.03 ( 0.43 - 2.48 )	1.03 ( 0.01 )
URINARY RETENTION	RENAL AND URINARY DISORDERS	5	5.04 ( 2.09 - 12.17 )	5.04 ( 16.07 )
CHRONIC KIDNEY DISEASE	RENAL AND URINARY DISORDERS	5	3.69 ( 1.53 - 8.89 )	3.69 ( 9.73 )
CARDIAC FAILURE CONGESTIVE	CARDIAC DISORDERS	5	1.27 ( 0.53 - 3.05 )	1.27 ( 0.28 )
DRUG-INDUCED LIVER INJURY	HEPATOBILIARY DISORDERS	5	2.43 ( 1.01 - 5.85 )	2.43 ( 4.18 )
DISORIENTATION	PSYCHIATRIC DISORDERS	5	4.68 ( 1.94 - 11.3 )	4.68 ( 14.37 )
RHINORRHOEA	RESPIRATORY, THORACIC AND MEDIASTINAL DISORDERS	5	0.55 ( 0.23 - 1.31 )	0.55 ( 1.89 )
LOWER LIMB FRACTURE	INJURY, POISONING AND PROCEDURAL COMPLICATIONS	5	1.31 ( 0.55 - 3.16 )	1.31 ( 0.37 )
LIP SWELLING	GASTROINTESTINAL DISORDERS	5	3.38 ( 1.4 - 8.14 )	3.38 ( 8.32 )
SWELLING FACE	GENERAL DISORDERS AND ADMINISTRATION SITE CONDITIONS	5	1.11 ( 0.46 - 2.67 )	1.11 ( 0.05 )
MASS	GENERAL DISORDERS AND ADMINISTRATION SITE CONDITIONS	5	2 ( 0.83 - 4.81 )	2 ( 2.48 )
CARDIAC ARREST	CARDIAC DISORDERS	5	2.38 ( 0.99 - 5.73 )	2.38 ( 3.98 )
MULTIPLE ORGAN DYSFUNCTION SYNDROME	GENERAL DISORDERS AND ADMINISTRATION SITE CONDITIONS	5	5.36 ( 2.22 - 12.93 )	5.35 ( 17.55 )
SPINAL CORD ABSCESS	INFECTIONS AND INFESTATIONS	5	111.94 ( 43.09 - 290.78 )	111.84 ( 463.42 )
PANCREATITIS	GASTROINTESTINAL DISORDERS	5	1.96 ( 0.82 - 4.72 )	1.96 ( 2.35 )
HEPATOCELLULAR CARCINOMA	NEOPLASMS BENIGN, MALIGNANT AND UNSPECIFIED (INCL CYSTS AND POLYPS)	5	32.5 ( 13.21 - 79.94 )	32.47 ( 144.72 )
PERICARDITIS	CARDIAC DISORDERS	5	0.58 ( 0.24 - 1.4 )	0.58 ( 1.5 )
PULMONARY ARTERIAL HYPERTENSION	RESPIRATORY, THORACIC AND MEDIASTINAL DISORDERS	5	22.72 ( 9.3 - 55.51 )	22.7 ( 99.98 )
IMMUNE SYSTEM DISORDER	IMMUNE SYSTEM DISORDERS	5	2 ( 0.83 - 4.81 )	2 ( 2.48 )
LYMPHADENOPATHY	BLOOD AND LYMPHATIC SYSTEM DISORDERS	5	1.23 ( 0.51 - 2.96 )	1.23 ( 0.21 )
LYMPHOPROLIFERATIVE DISORDER	NEOPLASMS BENIGN, MALIGNANT AND UNSPECIFIED (INCL CYSTS AND POLYPS)	5	2.76 ( 1.15 - 6.65 )	2.76 ( 5.59 )
EYE INFECTION	INFECTIONS AND INFESTATIONS	5	2.26 ( 0.94 - 5.44 )	2.26 ( 3.49 )
ABDOMINAL PAIN LOWER	GASTROINTESTINAL DISORDERS	5	4.83 ( 2 - 11.66 )	4.83 ( 15.07 )
HERPES VIRUS INFECTION	INFECTIONS AND INFESTATIONS	5	4.46 ( 1.85 - 10.76 )	4.46 ( 13.33 )
PANNICULITIS	SKIN AND SUBCUTANEOUS TISSUE DISORDERS	5	4.08 ( 1.69 - 9.83 )	4.08 ( 11.53 )
VENOUS THROMBOSIS	VASCULAR DISORDERS	5	29.34 ( 11.95 - 72.02 )	29.32 ( 130.43 )
HEPATITIS B REACTIVATION	INFECTIONS AND INFESTATIONS	5	11.9 ( 4.91 - 28.84 )	11.89 ( 48.9 )
THYROID CANCER	NEOPLASMS BENIGN, MALIGNANT AND UNSPECIFIED (INCL CYSTS AND POLYPS)	5	6.87 ( 2.84 - 16.59 )	6.86 ( 24.76 )
RENAL CYST	RENAL AND URINARY DISORDERS	5	5.7 ( 2.36 - 13.76 )	5.7 ( 19.19 )
ABSCESS LIMB	INFECTIONS AND INFESTATIONS	5	6.03 ( 2.5 - 14.56 )	6.03 ( 20.76 )
BRONCHOPULMONARY ASPERGILLOSIS	INFECTIONS AND INFESTATIONS	5	12.97 ( 5.35 - 31.47 )	12.96 ( 54.03 )
CERVIX CARCINOMA	NEOPLASMS BENIGN, MALIGNANT AND UNSPECIFIED (INCL CYSTS AND POLYPS)	5	12.09 ( 4.99 - 29.31 )	12.08 ( 49.81 )
DRUG ERUPTION	SKIN AND SUBCUTANEOUS TISSUE DISORDERS	5	2.54 ( 1.05 - 6.11 )	2.54 ( 4.63 )
CARDIO-RESPIRATORY ARREST	CARDIAC DISORDERS	5	5.9 ( 2.45 - 14.25 )	5.9 ( 20.14 )
TRANSAMINASES INCREASED	INVESTIGATIONS	5	3.44 ( 1.43 - 8.29 )	3.44 ( 8.6 )
GLOMERULAR FILTRATION RATE DECREASED	INVESTIGATIONS	5	14.12 ( 5.82 - 34.29 )	14.11 ( 59.52 )
PULMONARY MASS	RESPIRATORY, THORACIC AND MEDIASTINAL DISORDERS	5	1.43 ( 0.6 - 3.45 )	1.43 ( 0.65 )
ANKLE FRACTURE	INJURY, POISONING AND PROCEDURAL COMPLICATIONS	5	2.13 ( 0.88 - 5.12 )	2.13 ( 2.97 )
APHTHOUS ULCER	GASTROINTESTINAL DISORDERS	5	4.97 ( 2.06 - 11.99 )	4.97 ( 15.71 )
HERPES ZOSTER MENINGITIS	INFECTIONS AND INFESTATIONS	5	159.07 ( 59.37 - 426.17 )	158.93 ( 621.2 )
GASTROINTESTINAL INFECTION	INFECTIONS AND INFESTATIONS	5	3.38 ( 1.4 - 8.15 )	3.38 ( 8.34 )
ANAPHYLACTIC REACTION	IMMUNE SYSTEM DISORDERS	5	1.65 ( 0.68 - 3.97 )	1.65 ( 1.27 )
ANGINA PECTORIS	CARDIAC DISORDERS	5	2.54 ( 1.06 - 6.12 )	2.54 ( 4.66 )
EMBOLISM VENOUS	VASCULAR DISORDERS	5	53.97 ( 21.61 - 134.78 )	53.92 ( 238.42 )
LUNG NEOPLASM	NEOPLASMS BENIGN, MALIGNANT AND UNSPECIFIED (INCL CYSTS AND POLYPS)	5	5.08 ( 2.11 - 12.25 )	5.07 ( 16.23 )
ESCHERICHIA URINARY TRACT INFECTION	INFECTIONS AND INFESTATIONS	5	7.81 ( 3.23 - 18.87 )	7.8 ( 29.28 )
LYMPH NODE TUBERCULOSIS	INFECTIONS AND INFESTATIONS	4	14.74 ( 5.46 - 39.76 )	14.73 ( 49.97 )
INVASIVE DUCTAL BREAST CARCINOMA	NEOPLASMS BENIGN, MALIGNANT AND UNSPECIFIED (INCL CYSTS AND POLYPS)	4	9.75 ( 3.63 - 26.18 )	9.74 ( 30.88 )
CHOLELITHIASIS	HEPATOBILIARY DISORDERS	4	1.22 ( 0.46 - 3.25 )	1.22 ( 0.16 )
SUICIDAL IDEATION	PSYCHIATRIC DISORDERS	4	2.78 ( 1.04 - 7.43 )	2.78 ( 4.54 )
ANGIOEDEMA	SKIN AND SUBCUTANEOUS TISSUE DISORDERS	4	4.03 ( 1.51 - 10.77 )	4.03 ( 9.04 )
VERTIGO	EAR AND LABYRINTH DISORDERS	4	1.09 ( 0.41 - 2.92 )	1.09 ( 0.03 )
TACHYCARDIA	CARDIAC DISORDERS	4	1.32 ( 0.5 - 3.53 )	1.32 ( 0.32 )
HIATUS HERNIA	GASTROINTESTINAL DISORDERS	4	2.33 ( 0.87 - 6.24 )	2.33 ( 3.04 )
PANCREATIC CARCINOMA	NEOPLASMS BENIGN, MALIGNANT AND UNSPECIFIED (INCL CYSTS AND POLYPS)	4	4.72 ( 1.76 - 12.63 )	4.72 ( 11.63 )
DYSPHONIA	RESPIRATORY, THORACIC AND MEDIASTINAL DISORDERS	4	0.83 ( 0.31 - 2.21 )	0.83 ( 0.14 )
PNEUMONIA VIRAL	INFECTIONS AND INFESTATIONS	4	6.29 ( 2.35 - 16.86 )	6.29 ( 17.62 )
DYSSTASIA	NERVOUS SYSTEM DISORDERS	4	1.37 ( 0.51 - 3.66 )	1.37 ( 0.4 )
RENAL CELL CARCINOMA	NEOPLASMS BENIGN, MALIGNANT AND UNSPECIFIED (INCL CYSTS AND POLYPS)	4	13.07 ( 4.85 - 35.2 )	13.06 ( 43.6 )
CHEST DISCOMFORT	GENERAL DISORDERS AND ADMINISTRATION SITE CONDITIONS	4	0.64 ( 0.24 - 1.7 )	0.64 ( 0.83 )
POST PROCEDURAL INFECTION	INFECTIONS AND INFESTATIONS	4	1.64 ( 0.61 - 4.38 )	1.64 ( 0.99 )
MUSCULAR WEAKNESS	MUSCULOSKELETAL AND CONNECTIVE TISSUE DISORDERS	4	0.42 ( 0.16 - 1.12 )	0.42 ( 3.2 )
EYE SWELLING	EYE DISORDERS	4	1.9 ( 0.71 - 5.08 )	1.9 ( 1.7 )
SKIN DISORDER	SKIN AND SUBCUTANEOUS TISSUE DISORDERS	4	1.4 ( 0.52 - 3.74 )	1.4 ( 0.46 )
PERITONITIS	INFECTIONS AND INFESTATIONS	4	4.09 ( 1.53 - 10.94 )	4.09 ( 9.27 )
SQUAMOUS CELL CARCINOMA OF SKIN	NEOPLASMS BENIGN, MALIGNANT AND UNSPECIFIED (INCL CYSTS AND POLYPS)	4	4.8 ( 1.79 - 12.83 )	4.79 ( 11.91 )
DYSPEPSIA	GASTROINTESTINAL DISORDERS	4	0.54 ( 0.2 - 1.45 )	0.54 ( 1.54 )
DIFFUSE LARGE B-CELL LYMPHOMA STAGE IV	NEOPLASMS BENIGN, MALIGNANT AND UNSPECIFIED (INCL CYSTS AND POLYPS)	4	52.55 ( 18.91 - 146.04 )	52.51 ( 185.97 )
FACIAL PARALYSIS	NERVOUS SYSTEM DISORDERS	4	6.59 ( 2.46 - 17.65 )	6.58 ( 18.73 )
PULMONARY CONGESTION	RESPIRATORY, THORACIC AND MEDIASTINAL DISORDERS	4	2.85 ( 1.07 - 7.61 )	2.85 ( 4.78 )
FRACTURE	INJURY, POISONING AND PROCEDURAL COMPLICATIONS	4	1.86 ( 0.7 - 4.98 )	1.86 ( 1.6 )
HYPONATRAEMIA	METABOLISM AND NUTRITION DISORDERS	4	3.6 ( 1.35 - 9.61 )	3.59 ( 7.45 )
PANCREATITIS ACUTE	GASTROINTESTINAL DISORDERS	4	5.95 ( 2.22 - 15.95 )	5.95 ( 16.31 )
KNEE OPERATION	SURGICAL AND MEDICAL PROCEDURES	4	1.39 ( 0.52 - 3.71 )	1.39 ( 0.43 )
CHRONIC SINUSITIS	INFECTIONS AND INFESTATIONS	4	6.36 ( 2.37 - 17.04 )	6.36 ( 17.87 )
VENOUS THROMBOSIS LIMB	VASCULAR DISORDERS	4	17.14 ( 6.34 - 46.33 )	17.13 ( 59.09 )
PULMONARY INFARCTION	RESPIRATORY, THORACIC AND MEDIASTINAL DISORDERS	4	44.77 ( 16.21 - 123.65 )	44.73 ( 159.24 )
MELAENA	GASTROINTESTINAL DISORDERS	4	5.74 ( 2.14 - 15.37 )	5.74 ( 15.5 )
HYPOKALAEMIA	METABOLISM AND NUTRITION DISORDERS	4	3.16 ( 1.18 - 8.45 )	3.16 ( 5.88 )
BLOOD TRIGLYCERIDES INCREASED	INVESTIGATIONS	4	4.92 ( 1.84 - 13.17 )	4.92 ( 12.39 )
EMBOLIC STROKE	NERVOUS SYSTEM DISORDERS	4	48.35 ( 17.46 - 133.92 )	48.31 ( 171.61 )
HYPOGLYCAEMIA	METABOLISM AND NUTRITION DISORDERS	4	4.05 ( 1.51 - 10.83 )	4.05 ( 9.11 )
JOINT INJURY	INJURY, POISONING AND PROCEDURAL COMPLICATIONS	4	0.82 ( 0.31 - 2.18 )	0.82 ( 0.17 )
HYPERKALAEMIA	METABOLISM AND NUTRITION DISORDERS	4	10.74 ( 4 - 28.88 )	10.74 ( 34.7 )
BACTERIAL INFECTION	INFECTIONS AND INFESTATIONS	4	1.71 ( 0.64 - 4.57 )	1.71 ( 1.18 )
BACTERIAL SEPSIS	INFECTIONS AND INFESTATIONS	4	21.98 ( 8.1 - 59.62 )	21.96 ( 77.22 )
HEPATOTOXICITY	HEPATOBILIARY DISORDERS	4	2.03 ( 0.76 - 5.41 )	2.03 ( 2.07 )
ACUTE MYELOID LEUKAEMIA	NEOPLASMS BENIGN, MALIGNANT AND UNSPECIFIED (INCL CYSTS AND POLYPS)	4	8.39 ( 3.13 - 22.52 )	8.39 ( 25.67 )
AORTIC ANEURYSM	VASCULAR DISORDERS	4	4.45 ( 1.66 - 11.91 )	4.45 ( 10.62 )
RESPIRATORY DISORDER	RESPIRATORY, THORACIC AND MEDIASTINAL DISORDERS	4	1.01 ( 0.38 - 2.68 )	1.01 ( 0 )
HYPOACUSIS	EAR AND LABYRINTH DISORDERS	4	1.23 ( 0.46 - 3.29 )	1.23 ( 0.17 )
HERPES ZOSTER MENINGOENCEPHALITIS	INFECTIONS AND INFESTATIONS	4	142.2 ( 47.83 - 422.74 )	142.1 ( 453.68 )
SMALL CELL LUNG CANCER	NEOPLASMS BENIGN, MALIGNANT AND UNSPECIFIED (INCL CYSTS AND POLYPS)	4	23.24 ( 8.56 - 63.12 )	23.23 ( 81.93 )
LIVER INJURY	HEPATOBILIARY DISORDERS	4	0.97 ( 0.37 - 2.6 )	0.97 ( 0 )
GASTROINTESTINAL HAEMORRHAGE	GASTROINTESTINAL DISORDERS	4	1.7 ( 0.64 - 4.55 )	1.7 ( 1.16 )
GASTRIC ULCER	GASTROINTESTINAL DISORDERS	4	1.8 ( 0.68 - 4.82 )	1.8 ( 1.43 )
MUSCULOSKELETAL PAIN	MUSCULOSKELETAL AND CONNECTIVE TISSUE DISORDERS	4	0.25 ( 0.09 - 0.67 )	0.25 ( 9.01 )
RASH PRURITIC	SKIN AND SUBCUTANEOUS TISSUE DISORDERS	4	0.58 ( 0.22 - 1.56 )	0.58 ( 1.19 )
METASTASES TO LUNG	NEOPLASMS BENIGN, MALIGNANT AND UNSPECIFIED (INCL CYSTS AND POLYPS)	4	9.55 ( 3.56 - 25.66 )	9.55 ( 30.14 )
TINNITUS	EAR AND LABYRINTH DISORDERS	4	1.72 ( 0.64 - 4.58 )	1.72 ( 1.19 )
EPILEPSY	NERVOUS SYSTEM DISORDERS	4	3.06 ( 1.15 - 8.18 )	3.06 ( 5.53 )
BALANCE DISORDER	NERVOUS SYSTEM DISORDERS	4	0.99 ( 0.37 - 2.64 )	0.99 ( 0 )
INTESTINAL PERFORATION	GASTROINTESTINAL DISORDERS	4	3.66 ( 1.37 - 9.79 )	3.66 ( 7.69 )
METASTASES TO PERITONEUM	NEOPLASMS BENIGN, MALIGNANT AND UNSPECIFIED (INCL CYSTS AND POLYPS)	4	45.61 ( 16.5 - 126.07 )	45.58 ( 162.17 )
BRONCHIAL CARCINOMA	NEOPLASMS BENIGN, MALIGNANT AND UNSPECIFIED (INCL CYSTS AND POLYPS)	4	18.18 ( 6.72 - 49.16 )	18.16 ( 62.98 )
NECK PAIN	MUSCULOSKELETAL AND CONNECTIVE TISSUE DISORDERS	4	0.42 ( 0.16 - 1.11 )	0.42 ( 3.28 )
OEDEMA	GENERAL DISORDERS AND ADMINISTRATION SITE CONDITIONS	4	0.96 ( 0.36 - 2.56 )	0.96 ( 0.01 )
LOW DENSITY LIPOPROTEIN INCREASED	INVESTIGATIONS	4	11.46 ( 4.26 - 30.82 )	11.45 ( 37.44 )
NON-HODGKIN'S LYMPHOMA	NEOPLASMS BENIGN, MALIGNANT AND UNSPECIFIED (INCL CYSTS AND POLYPS)	4	3.18 ( 1.19 - 8.49 )	3.17 ( 5.93 )
TENDON RUPTURE	INJURY, POISONING AND PROCEDURAL COMPLICATIONS	4	1.59 ( 0.6 - 4.24 )	1.59 ( 0.87 )
GAIT INABILITY	GENERAL DISORDERS AND ADMINISTRATION SITE CONDITIONS	4	0.55 ( 0.21 - 1.46 )	0.55 ( 1.49 )
ARRHYTHMIA	CARDIAC DISORDERS	4	1.72 ( 0.64 - 4.59 )	1.72 ( 1.2 )
SPINAL FRACTURE	INJURY, POISONING AND PROCEDURAL COMPLICATIONS	4	1.4 ( 0.53 - 3.75 )	1.4 ( 0.47 )
ASPARTATE AMINOTRANSFERASE INCREASED	INVESTIGATIONS	4	1.18 ( 0.44 - 3.14 )	1.18 ( 0.11 )
DEAFNESS	EAR AND LABYRINTH DISORDERS	4	1.67 ( 0.63 - 4.45 )	1.67 ( 1.07 )
CATARACT	EYE DISORDERS	4	0.39 ( 0.15 - 1.04 )	0.39 ( 3.77 )
MULTIPLE SCLEROSIS	NERVOUS SYSTEM DISORDERS	4	4.12 ( 1.54 - 11.03 )	4.12 ( 9.4 )
RETINAL DETACHMENT	EYE DISORDERS	4	4.74 ( 1.77 - 12.68 )	4.74 ( 11.7 )
NEUTROPHIL COUNT DECREASED	INVESTIGATIONS	4	4.37 ( 1.63 - 11.69 )	4.37 ( 10.32 )
ACUTE CORONARY SYNDROME	CARDIAC DISORDERS	4	9.44 ( 3.52 - 25.36 )	9.44 ( 29.71 )
PULMONARY TUBERCULOSIS	INFECTIONS AND INFESTATIONS	3	2.3 ( 0.74 - 7.16 )	2.3 ( 2.2 )
BACTERAEMIA	INFECTIONS AND INFESTATIONS	3	5.22 ( 1.68 - 16.28 )	5.22 ( 10.15 )
AGRANULOCYTOSIS	BLOOD AND LYMPHATIC SYSTEM DISORDERS	3	3.61 ( 1.16 - 11.24 )	3.61 ( 5.63 )
CHOLECYSTITIS	HEPATOBILIARY DISORDERS	3	3.45 ( 1.11 - 10.72 )	3.44 ( 5.18 )
SCLERITIS	EYE DISORDERS	3	4.8 ( 1.54 - 14.94 )	4.79 ( 8.94 )
OVERDOSE	INJURY, POISONING AND PROCEDURAL COMPLICATIONS	3	1.1 ( 0.35 - 3.41 )	1.1 ( 0.03 )
CHRONIC LYMPHOCYTIC LEUKAEMIA	NEOPLASMS BENIGN, MALIGNANT AND UNSPECIFIED (INCL CYSTS AND POLYPS)	3	9.8 ( 3.13 - 30.67 )	9.79 ( 23.31 )
PSYCHOTIC DISORDER	PSYCHIATRIC DISORDERS	3	9.8 ( 3.13 - 30.67 )	9.79 ( 23.31 )
TIBIA FRACTURE	INJURY, POISONING AND PROCEDURAL COMPLICATIONS	3	3.07 ( 0.99 - 9.54 )	3.07 ( 4.16 )
GINGIVAL BLEEDING	GASTROINTESTINAL DISORDERS	3	3.78 ( 1.21 - 11.75 )	3.77 ( 6.08 )
COMPRESSION FRACTURE	INJURY, POISONING AND PROCEDURAL COMPLICATIONS	3	7.34 ( 2.35 - 22.92 )	7.34 ( 16.22 )
OSTEOMYELITIS	INFECTIONS AND INFESTATIONS	3	0.98 ( 0.32 - 3.04 )	0.98 ( 0 )
ULCER	GENERAL DISORDERS AND ADMINISTRATION SITE CONDITIONS	3	1.14 ( 0.37 - 3.53 )	1.14 ( 0.05 )
MUSCULOSKELETAL CHEST PAIN	MUSCULOSKELETAL AND CONNECTIVE TISSUE DISORDERS	3	1.83 ( 0.59 - 5.7 )	1.83 ( 1.13 )
SKIN LACERATION	INJURY, POISONING AND PROCEDURAL COMPLICATIONS	3	1.55 ( 0.5 - 4.81 )	1.55 ( 0.58 )
PROCEDURAL PAIN	INJURY, POISONING AND PROCEDURAL COMPLICATIONS	3	1.07 ( 0.34 - 3.31 )	1.07 ( 0.01 )
FEAR	PSYCHIATRIC DISORDERS	3	3.28 ( 1.05 - 10.2 )	3.28 ( 4.72 )
IMPAIRED HEALING	GENERAL DISORDERS AND ADMINISTRATION SITE CONDITIONS	3	0.25 ( 0.08 - 0.76 )	0.25 ( 6.97 )
JAUNDICE CHOLESTATIC	HEPATOBILIARY DISORDERS	3	31.8 ( 9.96 - 101.58 )	31.79 ( 84.98 )
HORDEOLUM	INFECTIONS AND INFESTATIONS	3	7.4 ( 2.37 - 23.11 )	7.39 ( 16.39 )
EYELID PTOSIS	EYE DISORDERS	3	7.55 ( 2.42 - 23.59 )	7.55 ( 16.84 )
ABSCESS	INFECTIONS AND INFESTATIONS	3	1.66 ( 0.53 - 5.15 )	1.66 ( 0.78 )
RENAL DISORDER	RENAL AND URINARY DISORDERS	3	0.83 ( 0.27 - 2.58 )	0.83 ( 0.1 )
INFLUENZA LIKE ILLNESS	GENERAL DISORDERS AND ADMINISTRATION SITE CONDITIONS	3	0.41 ( 0.13 - 1.26 )	0.41 ( 2.61 )
ANAEMIA MACROCYTIC	BLOOD AND LYMPHATIC SYSTEM DISORDERS	3	17.26 ( 5.48 - 54.41 )	17.25 ( 44.66 )
UNEVALUABLE EVENT	GENERAL DISORDERS AND ADMINISTRATION SITE CONDITIONS	3	0.45 ( 0.14 - 1.39 )	0.45 ( 2.04 )
ATYPICAL PNEUMONIA	INFECTIONS AND INFESTATIONS	3	7.22 ( 2.31 - 22.55 )	7.22 ( 15.88 )
LACUNAR INFARCTION	NERVOUS SYSTEM DISORDERS	3	21.08 ( 6.66 - 66.67 )	21.07 ( 55.41 )
PHARYNGITIS STREPTOCOCCAL	INFECTIONS AND INFESTATIONS	3	1.36 ( 0.44 - 4.23 )	1.36 ( 0.29 )
LABORATORY TEST ABNORMAL	INVESTIGATIONS	3	1.43 ( 0.46 - 4.45 )	1.43 ( 0.39 )
ECONOMIC PROBLEM	SOCIAL CIRCUMSTANCES	3	31.8 ( 9.96 - 101.58 )	31.79 ( 84.98 )
SJOGREN'S SYNDROME	MUSCULOSKELETAL AND CONNECTIVE TISSUE DISORDERS	3	1.62 ( 0.52 - 5.03 )	1.62 ( 0.71 )
WHITE BLOOD CELL COUNT INCREASED	INVESTIGATIONS	3	0.95 ( 0.31 - 2.95 )	0.95 ( 0.01 )
RIB FRACTURE	INJURY, POISONING AND PROCEDURAL COMPLICATIONS	3	1.09 ( 0.35 - 3.38 )	1.09 ( 0.02 )
FEMORAL NECK FRACTURE	INJURY, POISONING AND PROCEDURAL COMPLICATIONS	3	5.56 ( 1.78 - 17.33 )	5.56 ( 11.11 )
CEREBELLAR INFARCTION	NERVOUS SYSTEM DISORDERS	3	20.37 ( 6.44 - 64.38 )	20.36 ( 53.42 )
LIMB OPERATION	SURGICAL AND MEDICAL PROCEDURES	3	1.86 ( 0.6 - 5.77 )	1.86 ( 1.19 )
SKIN LESION	SKIN AND SUBCUTANEOUS TISSUE DISORDERS	3	1.06 ( 0.34 - 3.29 )	1.06 ( 0.01 )
HEART RATE INCREASED	INVESTIGATIONS	3	0.51 ( 0.16 - 1.57 )	0.51 ( 1.45 )
CYST	GENERAL DISORDERS AND ADMINISTRATION SITE CONDITIONS	3	0.99 ( 0.32 - 3.08 )	0.99 ( 0 )
STAPHYLOCOCCAL SEPSIS	INFECTIONS AND INFESTATIONS	3	4.97 ( 1.59 - 15.47 )	4.96 ( 9.42 )
HAEMOLYTIC ANAEMIA	BLOOD AND LYMPHATIC SYSTEM DISORDERS	3	14.62 ( 4.65 - 45.96 )	14.61 ( 37.14 )
PLATELET COUNT DECREASED	INVESTIGATIONS	3	0.89 ( 0.29 - 2.75 )	0.89 ( 0.04 )
SCIATICA	NERVOUS SYSTEM DISORDERS	3	0.63 ( 0.2 - 1.96 )	0.63 ( 0.64 )
SYNOVIAL CYST	MUSCULOSKELETAL AND CONNECTIVE TISSUE DISORDERS	3	1.27 ( 0.41 - 3.95 )	1.27 ( 0.18 )
BLOOD POTASSIUM DECREASED	INVESTIGATIONS	3	1.43 ( 0.46 - 4.45 )	1.43 ( 0.39 )
FOOT FRACTURE	INJURY, POISONING AND PROCEDURAL COMPLICATIONS	3	0.88 ( 0.28 - 2.72 )	0.88 ( 0.05 )
HEPATIC FAILURE	HEPATOBILIARY DISORDERS	3	2.95 ( 0.95 - 9.18 )	2.95 ( 3.85 )
PLATELET COUNT INCREASED	INVESTIGATIONS	3	4.02 ( 1.29 - 12.51 )	4.02 ( 6.75 )
PLASMA CELL MYELOMA	NEOPLASMS BENIGN, MALIGNANT AND UNSPECIFIED (INCL CYSTS AND POLYPS)	3	5.72 ( 1.83 - 17.83 )	5.72 ( 11.56 )
RASH MACULAR	SKIN AND SUBCUTANEOUS TISSUE DISORDERS	3	0.98 ( 0.32 - 3.06 )	0.98 ( 0 )
ASPHYXIA	RESPIRATORY, THORACIC AND MEDIASTINAL DISORDERS	3	9.15 ( 2.93 - 28.64 )	9.15 ( 21.46 )
SWOLLEN TONGUE	GASTROINTESTINAL DISORDERS	3	2.14 ( 0.69 - 6.64 )	2.14 ( 1.81 )
PERIPHERAL COLDNESS	VASCULAR DISORDERS	3	3.12 ( 1 - 9.72 )	3.12 ( 4.31 )
LIMB INJURY	INJURY, POISONING AND PROCEDURAL COMPLICATIONS	3	0.61 ( 0.2 - 1.91 )	0.62 ( 0.72 )
ECZEMA	SKIN AND SUBCUTANEOUS TISSUE DISORDERS	3	1.54 ( 0.49 - 4.77 )	1.54 ( 0.56 )
VARICELLA ZOSTER VIRUS INFECTION	INFECTIONS AND INFESTATIONS	3	21.33 ( 6.74 - 67.47 )	21.31 ( 56.11 )
PNEUMONITIS	RESPIRATORY, THORACIC AND MEDIASTINAL DISORDERS	3	1.34 ( 0.43 - 4.17 )	1.34 ( 0.26 )
INFLAMMATORY MARKER INCREASED	INVESTIGATIONS	3	2.06 ( 0.66 - 6.41 )	2.06 ( 1.64 )
OSTEONECROSIS OF JAW	MUSCULOSKELETAL AND CONNECTIVE TISSUE DISORDERS	3	3.2 ( 1.03 - 9.94 )	3.2 ( 4.5 )
TUBERCULOSIS	INFECTIONS AND INFESTATIONS	3	0.75 ( 0.24 - 2.34 )	0.75 ( 0.24 )
RASH PAPULAR	SKIN AND SUBCUTANEOUS TISSUE DISORDERS	3	1.24 ( 0.4 - 3.84 )	1.24 ( 0.14 )
BLINDNESS	EYE DISORDERS	3	1.16 ( 0.37 - 3.6 )	1.16 ( 0.07 )
FLUID RETENTION	METABOLISM AND NUTRITION DISORDERS	3	0.98 ( 0.32 - 3.04 )	0.98 ( 0 )
BRAIN NEOPLASM	NEOPLASMS BENIGN, MALIGNANT AND UNSPECIFIED (INCL CYSTS AND POLYPS)	3	3.55 ( 1.14 - 11.04 )	3.55 ( 5.45 )
DIVERTICULUM INTESTINAL	GASTROINTESTINAL DISORDERS	3	6.87 ( 2.2 - 21.43 )	6.86 ( 14.86 )
GASTRITIS	GASTROINTESTINAL DISORDERS	3	1.21 ( 0.39 - 3.75 )	1.21 ( 0.11 )
RASH VESICULAR	SKIN AND SUBCUTANEOUS TISSUE DISORDERS	3	4.98 ( 1.6 - 15.52 )	4.98 ( 9.46 )
LYMPHOCYTE COUNT DECREASED	INVESTIGATIONS	3	5.32 ( 1.71 - 16.57 )	5.31 ( 10.41 )
SQUAMOUS CELL CARCINOMA OF LUNG	NEOPLASMS BENIGN, MALIGNANT AND UNSPECIFIED (INCL CYSTS AND POLYPS)	3	12.42 ( 3.96 - 38.96 )	12.41 ( 30.84 )
ABDOMINAL DISTENSION	GASTROINTESTINAL DISORDERS	3	0.61 ( 0.2 - 1.88 )	0.61 ( 0.77 )
NEPHROTIC SYNDROME	RENAL AND URINARY DISORDERS	3	7.78 ( 2.49 - 24.3 )	7.78 ( 17.49 )
ACUTE RESPIRATORY FAILURE	RESPIRATORY, THORACIC AND MEDIASTINAL DISORDERS	3	3.27 ( 1.05 - 10.16 )	3.26 ( 4.69 )
HYPERTENSIVE CRISIS	VASCULAR DISORDERS	3	3.51 ( 1.13 - 10.91 )	3.5 ( 5.34 )
COLITIS ISCHAEMIC	GASTROINTESTINAL DISORDERS	3	6.59 ( 2.11 - 20.57 )	6.59 ( 14.07 )
CEREBRAL HAEMORRHAGE	NERVOUS SYSTEM DISORDERS	3	2.5 ( 0.8 - 7.77 )	2.5 ( 2.69 )
POLYMYOSITIS	MUSCULOSKELETAL AND CONNECTIVE TISSUE DISORDERS	3	11.93 ( 3.8 - 37.4 )	11.92 ( 29.43 )
PERONEAL NERVE PALSY	NERVOUS SYSTEM DISORDERS	3	9.44 ( 3.02 - 29.54 )	9.44 ( 22.28 )
NODULE	GENERAL DISORDERS AND ADMINISTRATION SITE CONDITIONS	3	0.51 ( 0.16 - 1.58 )	0.51 ( 1.41 )
THROAT TIGHTNESS	RESPIRATORY, THORACIC AND MEDIASTINAL DISORDERS	3	2.04 ( 0.66 - 6.33 )	2.04 ( 1.58 )
BLADDER CANCER	NEOPLASMS BENIGN, MALIGNANT AND UNSPECIFIED (INCL CYSTS AND POLYPS)	3	2.69 ( 0.86 - 8.36 )	2.69 ( 3.17 )
SHOCK	VASCULAR DISORDERS	3	4.51 ( 1.45 - 14.04 )	4.51 ( 8.13 )
TRANSITIONAL CELL CARCINOMA	NEOPLASMS BENIGN, MALIGNANT AND UNSPECIFIED (INCL CYSTS AND POLYPS)	3	21.33 ( 6.74 - 67.47 )	21.31 ( 56.11 )
SPINAL OPERATION	SURGICAL AND MEDICAL PROCEDURES	3	0.96 ( 0.31 - 2.97 )	0.96 ( 0.01 )
MOUTH ULCERATION	GASTROINTESTINAL DISORDERS	3	0.86 ( 0.28 - 2.66 )	0.86 ( 0.07 )
AORTIC DISSECTION	VASCULAR DISORDERS	3	15.36 ( 4.88 - 48.33 )	15.35 ( 39.26 )
APPENDICITIS	INFECTIONS AND INFESTATIONS	3	3.72 ( 1.2 - 11.58 )	3.72 ( 5.93 )
BRAIN ABSCESS	INFECTIONS AND INFESTATIONS	3	19.92 ( 6.3 - 62.94 )	19.91 ( 52.16 )
DISCOMFORT	GENERAL DISORDERS AND ADMINISTRATION SITE CONDITIONS	3	0.27 ( 0.09 - 0.84 )	0.27 ( 5.93 )
MATERNAL EXPOSURE DURING PREGNANCY	INJURY, POISONING AND PROCEDURAL COMPLICATIONS	3	0.27 ( 0.09 - 0.83 )	0.27 ( 6.05 )
PHLEBITIS	VASCULAR DISORDERS	3	5.36 ( 1.72 - 16.72 )	5.36 ( 10.55 )
GOUT	METABOLISM AND NUTRITION DISORDERS	3	2.15 ( 0.69 - 6.68 )	2.15 ( 1.84 )
CARPAL TUNNEL SYNDROME	NERVOUS SYSTEM DISORDERS	3	0.69 ( 0.22 - 2.14 )	0.69 ( 0.41 )
DYSPNOEA EXERTIONAL	RESPIRATORY, THORACIC AND MEDIASTINAL DISORDERS	3	1.73 ( 0.56 - 5.37 )	1.73 ( 0.92 )
DIABETES MELLITUS	METABOLISM AND NUTRITION DISORDERS	3	0.41 ( 0.13 - 1.26 )	0.41 ( 2.61 )
PROSTATITIS	REPRODUCTIVE SYSTEM AND BREAST DISORDERS	3	12.33 ( 3.93 - 38.69 )	12.32 ( 30.6 )
EPISTAXIS	RESPIRATORY, THORACIC AND MEDIASTINAL DISORDERS	3	0.8 ( 0.26 - 2.49 )	0.8 ( 0.14 )
C-REACTIVE PROTEIN ABNORMAL	INVESTIGATIONS	3	0.5 ( 0.16 - 1.56 )	0.5 ( 1.48 )
GASTRIC ULCER HAEMORRHAGE	GASTROINTESTINAL DISORDERS	3	7.46 ( 2.39 - 23.3 )	7.46 ( 16.57 )
LENTIGO MALIGNA	NEOPLASMS BENIGN, MALIGNANT AND UNSPECIFIED (INCL CYSTS AND POLYPS)	3	95.41 ( 28.22 - 322.5 )	95.36 ( 241.91 )
FINGER DEFORMITY	MUSCULOSKELETAL AND CONNECTIVE TISSUE DISORDERS	3	0.8 ( 0.26 - 2.49 )	0.8 ( 0.15 )
CARDIOVASCULAR DISORDER	CARDIAC DISORDERS	3	2.27 ( 0.73 - 7.05 )	2.27 ( 2.12 )
PERIPHERAL ARTERIAL OCCLUSIVE DISEASE	VASCULAR DISORDERS	3	7.08 ( 2.27 - 22.11 )	7.08 ( 15.48 )
MYCOBACTERIUM AVIUM COMPLEX INFECTION	INFECTIONS AND INFESTATIONS	3	7.08 ( 2.27 - 22.11 )	7.08 ( 15.48 )
OSTEOARTHRITIS	MUSCULOSKELETAL AND CONNECTIVE TISSUE DISORDERS	3	0.17 ( 0.05 - 0.52 )	0.17 ( 12.54 )
FURUNCLE	INFECTIONS AND INFESTATIONS	3	1.76 ( 0.57 - 5.47 )	1.76 ( 0.98 )
CARDIAC FAILURE ACUTE	CARDIAC DISORDERS	3	12.25 ( 3.9 - 38.42 )	12.24 ( 30.36 )
INTERVERTEBRAL DISC PROTRUSION	MUSCULOSKELETAL AND CONNECTIVE TISSUE DISORDERS	3	0.55 ( 0.18 - 1.7 )	0.55 ( 1.12 )
BASAL CELL CARCINOMA	NEOPLASMS BENIGN, MALIGNANT AND UNSPECIFIED (INCL CYSTS AND POLYPS)	3	0.69 ( 0.22 - 2.13 )	0.69 ( 0.43 )
SUSPECTED COVID-19	INFECTIONS AND INFESTATIONS	3	6 ( 1.92 - 18.72 )	6 ( 12.38 )
HERPES SIMPLEX	INFECTIONS AND INFESTATIONS	3	4.61 ( 1.48 - 14.37 )	4.61 ( 8.42 )
ONYCHOMYCOSIS	INFECTIONS AND INFESTATIONS	3	1.98 ( 0.64 - 6.15 )	1.98 ( 1.45 )
PULMONARY HYPERTENSION	RESPIRATORY, THORACIC AND MEDIASTINAL DISORDERS	3	3.06 ( 0.98 - 9.51 )	3.06 ( 4.13 )
VISION BLURRED	EYE DISORDERS	3	0.51 ( 0.16 - 1.58 )	0.51 ( 1.42 )
OSTEOPOROSIS	MUSCULOSKELETAL AND CONNECTIVE TISSUE DISORDERS	3	0.43 ( 0.14 - 1.34 )	0.43 ( 2.24 )
THROMBOTIC CEREBRAL INFARCTION	NERVOUS SYSTEM DISORDERS	2	86.31 ( 19.61 - 379.84 )	86.27 ( 147.5 )
HAEMOPTYSIS	RESPIRATORY, THORACIC AND MEDIASTINAL DISORDERS	2	1.47 ( 0.37 - 5.89 )	1.47 ( 0.3 )
HAEMATOMA	VASCULAR DISORDERS	2	1.22 ( 0.3 - 4.89 )	1.22 ( 0.08 )
CARDIOGENIC SHOCK	CARDIAC DISORDERS	2	5.62 ( 1.4 - 22.62 )	5.62 ( 7.52 )
MACULAR OEDEMA	EYE DISORDERS	2	17.02 ( 4.17 - 69.39 )	17.01 ( 29.32 )
CERVICOBRACHIAL SYNDROME	NERVOUS SYSTEM DISORDERS	2	19.81 ( 4.84 - 81.03 )	19.8 ( 34.57 )
BREAST CANCER RECURRENT	NEOPLASMS BENIGN, MALIGNANT AND UNSPECIFIED (INCL CYSTS AND POLYPS)	2	10.89 ( 2.69 - 44.08 )	10.88 ( 17.63 )
APHASIA	NERVOUS SYSTEM DISORDERS	2	1.68 ( 0.42 - 6.75 )	1.68 ( 0.55 )
INTESTINAL HAEMORRHAGE	GASTROINTESTINAL DISORDERS	2	5.23 ( 1.3 - 21.04 )	5.23 ( 6.78 )
HEPATIC ECHINOCOCCIASIS	INFECTIONS AND INFESTATIONS	2	201.38 ( 40.64 - 997.99 )	201.31 ( 298.97 )
AMENORRHOEA	REPRODUCTIVE SYSTEM AND BREAST DISORDERS	2	7.65 ( 1.9 - 30.85 )	7.64 ( 11.41 )
SLEEP DISORDER DUE TO GENERAL MEDICAL CONDITION, INSOMNIA TYPE	PSYCHIATRIC DISORDERS	2	0.45 ( 0.11 - 1.79 )	0.45 ( 1.37 )
MICROCYTIC ANAEMIA	BLOOD AND LYMPHATIC SYSTEM DISORDERS	2	10.6 ( 2.62 - 42.91 )	10.6 ( 17.08 )
TYPE 2 DIABETES MELLITUS	METABOLISM AND NUTRITION DISORDERS	2	0.4 ( 0.1 - 1.6 )	0.4 ( 1.79 )
EYELID INFECTION	INFECTIONS AND INFESTATIONS	2	24.66 ( 6 - 101.42 )	24.65 ( 43.6 )
GINGIVITIS	INFECTIONS AND INFESTATIONS	2	2.32 ( 0.58 - 9.32 )	2.32 ( 1.5 )
DENTAL CARIES	GASTROINTESTINAL DISORDERS	2	1.36 ( 0.34 - 5.46 )	1.36 ( 0.19 )
ANIMAL BITE	INJURY, POISONING AND PROCEDURAL COMPLICATIONS	2	2.68 ( 0.67 - 10.77 )	2.68 ( 2.1 )
LUNG CARCINOMA CELL TYPE UNSPECIFIED STAGE I	NEOPLASMS BENIGN, MALIGNANT AND UNSPECIFIED (INCL CYSTS AND POLYPS)	2	50.34 ( 11.9 - 213.08 )	50.33 ( 89.26 )
MYASTHENIA GRAVIS	NERVOUS SYSTEM DISORDERS	2	6.79 ( 1.68 - 27.36 )	6.79 ( 9.76 )
ULCER HAEMORRHAGE	GENERAL DISORDERS AND ADMINISTRATION SITE CONDITIONS	2	2.28 ( 0.57 - 9.16 )	2.28 ( 1.44 )
ELECTROCARDIOGRAM T WAVE INVERSION	INVESTIGATIONS	2	36.61 ( 8.78 - 152.63 )	36.6 ( 65.3 )
DYSGEUSIA	NERVOUS SYSTEM DISORDERS	2	0.91 ( 0.23 - 3.66 )	0.91 ( 0.02 )
BLADDER DISORDER	RENAL AND URINARY DISORDERS	2	2.63 ( 0.66 - 10.56 )	2.63 ( 2.01 )
HERPES ZOSTER OTICUS	INFECTIONS AND INFESTATIONS	2	21.2 ( 5.17 - 86.85 )	21.19 ( 37.17 )
LIMB MASS	MUSCULOSKELETAL AND CONNECTIVE TISSUE DISORDERS	2	2.66 ( 0.66 - 10.68 )	2.66 ( 2.06 )
DEATH OF RELATIVE	SOCIAL CIRCUMSTANCES	2	60.41 ( 14.12 - 258.53 )	60.39 ( 106.2 )
RECTAL CANCER	NEOPLASMS BENIGN, MALIGNANT AND UNSPECIFIED (INCL CYSTS AND POLYPS)	2	4.72 ( 1.17 - 18.98 )	4.72 ( 5.82 )
BLOOD CREATINE INCREASED	INVESTIGATIONS	2	8.63 ( 2.14 - 34.86 )	8.63 ( 13.3 )
ATRIOVENTRICULAR BLOCK COMPLETE	CARDIAC DISORDERS	2	7.85 ( 1.94 - 31.66 )	7.84 ( 11.79 )
BRADYCARDIA	CARDIAC DISORDERS	2	2.5 ( 0.62 - 10.03 )	2.5 ( 1.79 )
PULMONARY OEDEMA	RESPIRATORY, THORACIC AND MEDIASTINAL DISORDERS	2	0.61 ( 0.15 - 2.44 )	0.61 ( 0.5 )
GASTRIC ULCER PERFORATION	GASTROINTESTINAL DISORDERS	2	9.99 ( 2.47 - 40.4 )	9.98 ( 15.9 )
NERVOUSNESS	PSYCHIATRIC DISORDERS	2	0.68 ( 0.17 - 2.72 )	0.68 ( 0.3 )
AUTOIMMUNE HAEMOLYTIC ANAEMIA	BLOOD AND LYMPHATIC SYSTEM DISORDERS	2	48.33 ( 11.44 - 204.1 )	48.31 ( 85.81 )
DUODENAL ULCER	GASTROINTESTINAL DISORDERS	2	4.49 ( 1.12 - 18.06 )	4.49 ( 5.39 )
FOOD ALLERGY	IMMUNE SYSTEM DISORDERS	2	1.79 ( 0.45 - 7.17 )	1.79 ( 0.69 )
PULMONARY ALVEOLAR HAEMORRHAGE	RESPIRATORY, THORACIC AND MEDIASTINAL DISORDERS	2	10.79 ( 2.66 - 43.68 )	10.78 ( 17.44 )
OSTEONECROSIS	MUSCULOSKELETAL AND CONNECTIVE TISSUE DISORDERS	2	1.96 ( 0.49 - 7.86 )	1.96 ( 0.94 )
POLYP	GENERAL DISORDERS AND ADMINISTRATION SITE CONDITIONS	2	2.36 ( 0.59 - 9.48 )	2.36 ( 1.57 )
LARGE INTESTINE PERFORATION	GASTROINTESTINAL DISORDERS	2	2.99 ( 0.75 - 12 )	2.99 ( 2.64 )
GALLBLADDER DISORDER	HEPATOBILIARY DISORDERS	2	1.08 ( 0.27 - 4.32 )	1.08 ( 0.01 )
INVASIVE LOBULAR BREAST CARCINOMA	NEOPLASMS BENIGN, MALIGNANT AND UNSPECIFIED (INCL CYSTS AND POLYPS)	2	32.66 ( 7.87 - 135.53 )	32.64 ( 58.2 )
HEAD DISCOMFORT	NERVOUS SYSTEM DISORDERS	2	1.79 ( 0.45 - 7.17 )	1.79 ( 0.69 )
COSTOCHONDRITIS	MUSCULOSKELETAL AND CONNECTIVE TISSUE DISORDERS	2	7.5 ( 1.86 - 30.27 )	7.5 ( 11.13 )
VITH NERVE PARALYSIS	NERVOUS SYSTEM DISORDERS	2	31.8 ( 7.67 - 131.83 )	31.79 ( 56.65 )
RECTAL HAEMORRHAGE	GASTROINTESTINAL DISORDERS	2	0.98 ( 0.24 - 3.92 )	0.98 ( 0 )
EPSTEIN-BARR VIRUS INFECTION	INFECTIONS AND INFESTATIONS	2	2.58 ( 0.64 - 10.33 )	2.58 ( 1.92 )
LIVING IN RESIDENTIAL INSTITUTION	SOCIAL CIRCUMSTANCES	2	26.85 ( 6.51 - 110.71 )	26.84 ( 47.64 )
ENDOCARDITIS	INFECTIONS AND INFESTATIONS	2	3.95 ( 0.98 - 15.86 )	3.95 ( 4.37 )
VITILIGO	SKIN AND SUBCUTANEOUS TISSUE DISORDERS	2	17.51 ( 4.29 - 71.45 )	17.5 ( 30.25 )
BURSITIS	MUSCULOSKELETAL AND CONNECTIVE TISSUE DISORDERS	2	0.4 ( 0.1 - 1.59 )	0.4 ( 1.81 )
GLOSSODYNIA	GASTROINTESTINAL DISORDERS	2	0.17 ( 0.04 - 0.66 )	0.17 ( 8.42 )
DIVERTICULITIS INTESTINAL HAEMORRHAGIC	INFECTIONS AND INFESTATIONS	2	54.92 ( 12.91 - 233.62 )	54.9 ( 97.02 )
GASTRIC INFECTION	INFECTIONS AND INFESTATIONS	2	2.35 ( 0.58 - 9.41 )	2.35 ( 1.54 )
COLONOSCOPY	INVESTIGATIONS	2	8.82 ( 2.18 - 35.63 )	8.82 ( 13.66 )
INSURANCE ISSUE	SOCIAL CIRCUMSTANCES	2	2.46 ( 0.61 - 9.87 )	2.46 ( 1.73 )
ORAL PAIN	GASTROINTESTINAL DISORDERS	2	1.1 ( 0.27 - 4.41 )	1.1 ( 0.02 )
RENAL NEOPLASM	NEOPLASMS BENIGN, MALIGNANT AND UNSPECIFIED (INCL CYSTS AND POLYPS)	2	6.33 ( 1.57 - 25.48 )	6.32 ( 8.87 )
PNEUMONIA PNEUMOCOCCAL	INFECTIONS AND INFESTATIONS	2	7.41 ( 1.84 - 29.9 )	7.41 ( 10.96 )
HEPATITIS E	INFECTIONS AND INFESTATIONS	2	11.85 ( 2.92 - 48.02 )	11.84 ( 19.47 )
HYPERLIPIDAEMIA	METABOLISM AND NUTRITION DISORDERS	2	3.31 ( 0.82 - 13.29 )	3.31 ( 3.21 )
HEPATIC ENZYME ABNORMAL	INVESTIGATIONS	2	2.39 ( 0.6 - 9.58 )	2.39 ( 1.61 )
MULTIPLE ALLERGIES	IMMUNE SYSTEM DISORDERS	2	2.68 ( 0.67 - 10.77 )	2.68 ( 2.1 )
RESPIRATORY TRACT CONGESTION	RESPIRATORY, THORACIC AND MEDIASTINAL DISORDERS	2	0.45 ( 0.11 - 1.81 )	0.45 ( 1.33 )
HAEMATOCHEZIA	GASTROINTESTINAL DISORDERS	2	0.77 ( 0.19 - 3.1 )	0.77 ( 0.13 )
ATELECTASIS	RESPIRATORY, THORACIC AND MEDIASTINAL DISORDERS	2	3.04 ( 0.76 - 12.18 )	3.03 ( 2.72 )
DISSEMINATED INTRAVASCULAR COAGULATION	BLOOD AND LYMPHATIC SYSTEM DISORDERS	2	2.49 ( 0.62 - 9.97 )	2.49 ( 1.77 )
LUNG INFILTRATION	RESPIRATORY, THORACIC AND MEDIASTINAL DISORDERS	2	2.8 ( 0.7 - 11.22 )	2.8 ( 2.3 )
FOETAL EXPOSURE DURING PREGNANCY	INJURY, POISONING AND PROCEDURAL COMPLICATIONS	2	2.54 ( 0.63 - 10.18 )	2.54 ( 1.86 )
CORONARY ARTERY DISEASE	CARDIAC DISORDERS	2	1.05 ( 0.26 - 4.2 )	1.05 ( 0 )
BLOOD CREATININE INCREASED	INVESTIGATIONS	2	0.81 ( 0.2 - 3.26 )	0.81 ( 0.08 )
CYTOMEGALOVIRUS INFECTION	INFECTIONS AND INFESTATIONS	2	3.84 ( 0.95 - 15.41 )	3.83 ( 4.16 )
GASTROINTESTINAL CARCINOMA	NEOPLASMS BENIGN, MALIGNANT AND UNSPECIFIED (INCL CYSTS AND POLYPS)	2	5.3 ( 1.32 - 21.32 )	5.3 ( 6.91 )
RETINAL ARTERY OCCLUSION	EYE DISORDERS	2	21.97 ( 5.36 - 90.08 )	21.96 ( 38.61 )
FEELING HOT	GENERAL DISORDERS AND ADMINISTRATION SITE CONDITIONS	2	0.37 ( 0.09 - 1.49 )	0.37 ( 2.1 )
MADAROSIS	SKIN AND SUBCUTANEOUS TISSUE DISORDERS	2	16.55 ( 4.06 - 67.46 )	16.55 ( 28.43 )
ATYPICAL FEMUR FRACTURE	INJURY, POISONING AND PROCEDURAL COMPLICATIONS	2	17.26 ( 4.23 - 70.41 )	17.25 ( 29.78 )
DEEP VEIN THROMBOSIS POSTOPERATIVE	INJURY, POISONING AND PROCEDURAL COMPLICATIONS	2	1.5 ( 0.37 - 5.99 )	1.49 ( 0.33 )
ERYSIPELAS	INFECTIONS AND INFESTATIONS	2	2.06 ( 0.51 - 8.25 )	2.06 ( 1.08 )
DERMATOMYOSITIS	SKIN AND SUBCUTANEOUS TISSUE DISORDERS	2	6.6 ( 1.64 - 26.61 )	6.6 ( 9.4 )
CATHETERISATION CARDIAC	INVESTIGATIONS	2	6.01 ( 1.49 - 24.21 )	6.01 ( 8.27 )
STENT PLACEMENT	SURGICAL AND MEDICAL PROCEDURES	2	3.37 ( 0.84 - 13.51 )	3.36 ( 3.31 )
MALNUTRITION	METABOLISM AND NUTRITION DISORDERS	2	4.66 ( 1.16 - 18.76 )	4.66 ( 5.71 )
HAIR TEXTURE ABNORMAL	SKIN AND SUBCUTANEOUS TISSUE DISORDERS	2	5.84 ( 1.45 - 23.5 )	5.83 ( 7.94 )
PNEUMOCYSTIS JIROVECII INFECTION	INFECTIONS AND INFESTATIONS	2	17.77 ( 4.35 - 72.52 )	17.76 ( 30.73 )
ENDOMETRIAL ADENOCARCINOMA	NEOPLASMS BENIGN, MALIGNANT AND UNSPECIFIED (INCL CYSTS AND POLYPS)	2	17.77 ( 4.35 - 72.52 )	17.76 ( 30.73 )
ABNORMAL WEIGHT GAIN	METABOLISM AND NUTRITION DISORDERS	2	34.52 ( 8.3 - 143.57 )	34.51 ( 61.56 )
BRONCHITIS CHRONIC	RESPIRATORY, THORACIC AND MEDIASTINAL DISORDERS	2	2.54 ( 0.63 - 10.2 )	2.54 ( 1.86 )
ARTERIOSCLEROSIS	VASCULAR DISORDERS	2	3.69 ( 0.92 - 14.84 )	3.69 ( 3.91 )
DISTURBANCE IN ATTENTION	NERVOUS SYSTEM DISORDERS	2	1.79 ( 0.45 - 7.17 )	1.79 ( 0.69 )
LUNG CARCINOMA CELL TYPE UNSPECIFIED STAGE IV	NEOPLASMS BENIGN, MALIGNANT AND UNSPECIFIED (INCL CYSTS AND POLYPS)	2	14.05 ( 3.46 - 57.1 )	14.04 ( 23.68 )
CHOLECYSTITIS ACUTE	HEPATOBILIARY DISORDERS	2	6.36 ( 1.58 - 25.62 )	6.36 ( 8.94 )
PANCREATIC CARCINOMA STAGE IV	NEOPLASMS BENIGN, MALIGNANT AND UNSPECIFIED (INCL CYSTS AND POLYPS)	2	201.38 ( 40.64 - 997.99 )	201.31 ( 298.97 )
ARTHRITIS INFECTIVE	INFECTIONS AND INFESTATIONS	2	0.96 ( 0.24 - 3.86 )	0.96 ( 0 )
HERPES OPHTHALMIC	INFECTIONS AND INFESTATIONS	2	8.76 ( 2.17 - 35.37 )	8.75 ( 13.54 )
BLOOD GLUCOSE INCREASED	INVESTIGATIONS	2	0.45 ( 0.11 - 1.8 )	0.45 ( 1.34 )
OSTEOPENIA	MUSCULOSKELETAL AND CONNECTIVE TISSUE DISORDERS	2	1.26 ( 0.32 - 5.06 )	1.26 ( 0.11 )
RASH MACULO-PAPULAR	SKIN AND SUBCUTANEOUS TISSUE DISORDERS	2	2.48 ( 0.62 - 9.95 )	2.48 ( 1.76 )
HAEMOPHAGOCYTIC LYMPHOHISTIOCYTOSIS	IMMUNE SYSTEM DISORDERS	2	8.11 ( 2.01 - 32.73 )	8.11 ( 12.29 )
INFECTIOUS PLEURAL EFFUSION	INFECTIONS AND INFESTATIONS	2	6.94 ( 1.72 - 27.99 )	6.94 ( 10.06 )
CYTOMEGALOVIRUS ENTEROCOLITIS	INFECTIONS AND INFESTATIONS	2	71.07 ( 16.42 - 307.71 )	71.05 ( 123.59 )
CHOLECYSTECTOMY	SURGICAL AND MEDICAL PROCEDURES	2	1.57 ( 0.39 - 6.29 )	1.57 ( 0.41 )
THERAPY CHANGE	SURGICAL AND MEDICAL PROCEDURES	2	7.28 ( 1.8 - 29.35 )	7.28 ( 10.7 )
CEREBRAL VENOUS SINUS THROMBOSIS	NERVOUS SYSTEM DISORDERS	2	201.38 ( 40.64 - 997.99 )	201.31 ( 298.97 )
JUGULAR VEIN THROMBOSIS	VASCULAR DISORDERS	2	63.59 ( 14.81 - 273.09 )	63.57 ( 111.44 )
NASAL CONGESTION	RESPIRATORY, THORACIC AND MEDIASTINAL DISORDERS	2	0.25 ( 0.06 - 1 )	0.25 ( 4.53 )
ATYPICAL MYCOBACTERIAL INFECTION	INFECTIONS AND INFESTATIONS	2	5.06 ( 1.26 - 20.34 )	5.05 ( 6.45 )
ENCEPHALITIS VIRAL	INFECTIONS AND INFESTATIONS	2	14.56 ( 3.58 - 59.2 )	14.55 ( 24.65 )
NEUROPATHY PERIPHERAL	NERVOUS SYSTEM DISORDERS	2	0.46 ( 0.12 - 1.86 )	0.46 ( 1.23 )
PRESCRIBED OVERDOSE	INJURY, POISONING AND PROCEDURAL COMPLICATIONS	2	0.93 ( 0.23 - 3.74 )	0.93 ( 0.01 )
CHOLESTASIS	HEPATOBILIARY DISORDERS	2	4.07 ( 1.01 - 16.35 )	4.07 ( 4.59 )
HYPERTRIGLYCERIDAEMIA	METABOLISM AND NUTRITION DISORDERS	2	17.02 ( 4.17 - 69.39 )	17.01 ( 29.32 )
BONE PAIN	MUSCULOSKELETAL AND CONNECTIVE TISSUE DISORDERS	2	0.53 ( 0.13 - 2.1 )	0.53 ( 0.86 )
B-CELL LYMPHOMA	NEOPLASMS BENIGN, MALIGNANT AND UNSPECIFIED (INCL CYSTS AND POLYPS)	2	2.61 ( 0.65 - 10.47 )	2.61 ( 1.98 )
SKIN MASS	SKIN AND SUBCUTANEOUS TISSUE DISORDERS	2	1.85 ( 0.46 - 7.41 )	1.85 ( 0.78 )
LYMPHOCYTOSIS	BLOOD AND LYMPHATIC SYSTEM DISORDERS	2	13.58 ( 3.34 - 55.14 )	13.57 ( 22.78 )
LIGAMENT SPRAIN	INJURY, POISONING AND PROCEDURAL COMPLICATIONS	2	1.07 ( 0.27 - 4.29 )	1.07 ( 0.01 )
SKIN ABRASION	INJURY, POISONING AND PROCEDURAL COMPLICATIONS	2	3.31 ( 0.82 - 13.29 )	3.31 ( 3.21 )
PALLOR	VASCULAR DISORDERS	2	1.77 ( 0.44 - 7.1 )	1.77 ( 0.67 )
EAR DISORDER	EAR AND LABYRINTH DISORDERS	2	3.46 ( 0.86 - 13.9 )	3.46 ( 3.48 )
LEGIONELLA INFECTION	INFECTIONS AND INFESTATIONS	2	15.9 ( 3.9 - 64.75 )	15.89 ( 27.2 )
MANTLE CELL LYMPHOMA	NEOPLASMS BENIGN, MALIGNANT AND UNSPECIFIED (INCL CYSTS AND POLYPS)	2	30.21 ( 7.3 - 125.02 )	30.2 ( 53.77 )
INCREASED APPETITE	METABOLISM AND NUTRITION DISORDERS	2	2.77 ( 0.69 - 11.12 )	2.77 ( 2.25 )
VARICOSE VEIN	VASCULAR DISORDERS	2	2.33 ( 0.58 - 9.33 )	2.33 ( 1.51 )
PROTEINURIA	RENAL AND URINARY DISORDERS	2	3.92 ( 0.98 - 15.76 )	3.92 ( 4.33 )
UPPER LIMB FRACTURE	INJURY, POISONING AND PROCEDURAL COMPLICATIONS	2	0.54 ( 0.14 - 2.17 )	0.54 ( 0.78 )
HUMERUS FRACTURE	INJURY, POISONING AND PROCEDURAL COMPLICATIONS	2	2.4 ( 0.6 - 9.61 )	2.4 ( 1.62 )
RIGHT VENTRICULAR FAILURE	CARDIAC DISORDERS	2	14.56 ( 3.58 - 59.2 )	14.55 ( 24.65 )
SARS-COV-2 TEST POSITIVE	INVESTIGATIONS	2	1.01 ( 0.25 - 4.03 )	1.01 ( 0 )
PUTAMEN HAEMORRHAGE	NERVOUS SYSTEM DISORDERS	2	109.84 ( 24.34 - 495.69 )	109.8 ( 182.45 )
THIRST	GENERAL DISORDERS AND ADMINISTRATION SITE CONDITIONS	2	3.32 ( 0.83 - 13.33 )	3.32 ( 3.22 )
HAEMATEMESIS	GASTROINTESTINAL DISORDERS	2	1.92 ( 0.48 - 7.69 )	1.92 ( 0.87 )
ILEUS	GASTROINTESTINAL DISORDERS	2	5.3 ( 1.32 - 21.32 )	5.3 ( 6.91 )
HAEMATOCRIT DECREASED	INVESTIGATIONS	2	1.75 ( 0.44 - 7.03 )	1.75 ( 0.65 )
RED BLOOD CELL COUNT DECREASED	INVESTIGATIONS	2	1.1 ( 0.28 - 4.42 )	1.1 ( 0.02 )
SPINAL COLUMN INJURY	INJURY, POISONING AND PROCEDURAL COMPLICATIONS	2	3.96 ( 0.99 - 15.92 )	3.96 ( 4.4 )
BURSITIS INFECTIVE	INFECTIONS AND INFESTATIONS	2	6.64 ( 1.65 - 26.75 )	6.64 ( 9.47 )
SPINAL PAIN	MUSCULOSKELETAL AND CONNECTIVE TISSUE DISORDERS	2	0.99 ( 0.25 - 3.94 )	0.99 ( 0 )
PLATELET COUNT ABNORMAL	INVESTIGATIONS	2	14.73 ( 3.62 - 59.93 )	14.73 ( 24.99 )
INGUINAL HERNIA	GASTROINTESTINAL DISORDERS	2	2.35 ( 0.58 - 9.41 )	2.35 ( 1.54 )
BLOOD PRESSURE FLUCTUATION	VASCULAR DISORDERS	2	0.38 ( 0.1 - 1.53 )	0.38 ( 1.98 )
CEREBRAL VENOUS THROMBOSIS	NERVOUS SYSTEM DISORDERS	2	80.55 ( 18.42 - 352.33 )	80.52 ( 138.59 )
ABDOMINAL INFECTION	INFECTIONS AND INFESTATIONS	2	9.51 ( 2.35 - 38.47 )	9.51 ( 15 )
VAGINAL INFECTION	INFECTIONS AND INFESTATIONS	2	2.76 ( 0.69 - 11.09 )	2.76 ( 2.24 )
DRUG HYPERSENSITIVITY	IMMUNE SYSTEM DISORDERS	2	0.08 ( 0.02 - 0.31 )	0.08 ( 21.62 )
ALTERED STATE OF CONSCIOUSNESS	NERVOUS SYSTEM DISORDERS	2	4.87 ( 1.21 - 19.59 )	4.87 ( 6.1 )
BRAIN INJURY	NERVOUS SYSTEM DISORDERS	2	8.28 ( 2.05 - 33.41 )	8.27 ( 12.62 )
ENCEPHALITIS	INFECTIONS AND INFESTATIONS	2	3.14 ( 0.78 - 12.6 )	3.14 ( 2.9 )
HEMIPARESIS	NERVOUS SYSTEM DISORDERS	2	2.51 ( 0.62 - 10.05 )	2.51 ( 1.8 )
VASCULITIS	VASCULAR DISORDERS	2	1.15 ( 0.29 - 4.62 )	1.15 ( 0.04 )
PHARYNGEAL ABSCESS	INFECTIONS AND INFESTATIONS	2	20.48 ( 5 - 83.84 )	20.47 ( 35.83 )
TREMOR	NERVOUS SYSTEM DISORDERS	2	0.33 ( 0.08 - 1.32 )	0.33 ( 2.72 )
PELVIC VENOUS THROMBOSIS	VASCULAR DISORDERS	2	63.59 ( 14.81 - 273.09 )	63.57 ( 111.44 )
METASTASES TO BONE	NEOPLASMS BENIGN, MALIGNANT AND UNSPECIFIED (INCL CYSTS AND POLYPS)	2	5.23 ( 1.3 - 21.04 )	5.23 ( 6.78 )
NON-SMALL CELL LUNG CANCER	NEOPLASMS BENIGN, MALIGNANT AND UNSPECIFIED (INCL CYSTS AND POLYPS)	2	8.05 ( 2 - 32.51 )	8.05 ( 12.19 )
AMNESIA	NERVOUS SYSTEM DISORDERS	2	0.45 ( 0.11 - 1.82 )	0.45 ( 1.31 )
AMYOTROPHIC LATERAL SCLEROSIS	NERVOUS SYSTEM DISORDERS	2	7.7 ( 1.91 - 31.05 )	7.69 ( 11.5 )
MALIGNANT PLEURAL EFFUSION	RESPIRATORY, THORACIC AND MEDIASTINAL DISORDERS	2	25.71 ( 6.24 - 105.86 )	25.7 ( 45.54 )
BLADDER TRANSITIONAL CELL CARCINOMA	NEOPLASMS BENIGN, MALIGNANT AND UNSPECIFIED (INCL CYSTS AND POLYPS)	2	11.08 ( 2.74 - 44.9 )	11.08 ( 18.01 )
TENDONITIS	MUSCULOSKELETAL AND CONNECTIVE TISSUE DISORDERS	2	0.96 ( 0.24 - 3.83 )	0.96 ( 0 )
FOOT DEFORMITY	MUSCULOSKELETAL AND CONNECTIVE TISSUE DISORDERS	2	0.27 ( 0.07 - 1.08 )	0.27 ( 3.96 )
DIARRHOEA HAEMORRHAGIC	GASTROINTESTINAL DISORDERS	2	4.61 ( 1.15 - 18.54 )	4.61 ( 5.61 )
SUBCUTANEOUS ABSCESS	INFECTIONS AND INFESTATIONS	2	2.61 ( 0.65 - 10.47 )	2.61 ( 1.98 )
WOUND	INJURY, POISONING AND PROCEDURAL COMPLICATIONS	2	0.16 ( 0.04 - 0.63 )	0.16 ( 8.92 )
CHRONIC MYELOID LEUKAEMIA	NEOPLASMS BENIGN, MALIGNANT AND UNSPECIFIED (INCL CYSTS AND POLYPS)	2	11.08 ( 2.74 - 44.9 )	11.08 ( 18.01 )
SKIN CANCER	NEOPLASMS BENIGN, MALIGNANT AND UNSPECIFIED (INCL CYSTS AND POLYPS)	2	0.52 ( 0.13 - 2.1 )	0.52 ( 0.86 )
VULVOVAGINAL MYCOTIC INFECTION	INFECTIONS AND INFESTATIONS	2	2.65 ( 0.66 - 10.63 )	2.65 ( 2.04 )
APHONIA	RESPIRATORY, THORACIC AND MEDIASTINAL DISORDERS	2	1.27 ( 0.32 - 5.08 )	1.27 ( 0.11 )
GINGIVAL SWELLING	GASTROINTESTINAL DISORDERS	2	5.3 ( 1.32 - 21.32 )	5.3 ( 6.91 )
FEBRILE NEUTROPENIA	BLOOD AND LYMPHATIC SYSTEM DISORDERS	2	3.28 ( 0.82 - 13.18 )	3.28 ( 3.16 )
LUNG SQUAMOUS CELL CARCINOMA STAGE I	NEOPLASMS BENIGN, MALIGNANT AND UNSPECIFIED (INCL CYSTS AND POLYPS)	2	92.94 ( 20.97 - 411.97 )	92.91 ( 157.6 )
COGNITIVE DISORDER	NERVOUS SYSTEM DISORDERS	2	2.06 ( 0.51 - 8.26 )	2.06 ( 1.09 )
LIMB DISCOMFORT	MUSCULOSKELETAL AND CONNECTIVE TISSUE DISORDERS	2	0.48 ( 0.12 - 1.92 )	0.48 ( 1.13 )
ALVEOLAR PROTEINOSIS	RESPIRATORY, THORACIC AND MEDIASTINAL DISORDERS	2	86.31 ( 19.61 - 379.84 )	86.27 ( 147.5 )
OVARIAN CANCER	NEOPLASMS BENIGN, MALIGNANT AND UNSPECIFIED (INCL CYSTS AND POLYPS)	2	2.46 ( 0.61 - 9.85 )	2.45 ( 1.72 )
VENTRICULAR TACHYCARDIA	CARDIAC DISORDERS	2	6.57 ( 1.63 - 26.46 )	6.56 ( 9.33 )
HAEMORRHOIDS	GASTROINTESTINAL DISORDERS	2	1.38 ( 0.34 - 5.53 )	1.38 ( 0.21 )
HELICOBACTER INFECTION	INFECTIONS AND INFESTATIONS	2	0.31 ( 0.08 - 1.23 )	0.31 ( 3.1 )
VISUAL ACUITY REDUCED	EYE DISORDERS	2	1.23 ( 0.31 - 4.93 )	1.23 ( 0.09 )
ERYTHEMA	SKIN AND SUBCUTANEOUS TISSUE DISORDERS	2	0.13 ( 0.03 - 0.5 )	0.13 ( 12.17 )
FACIAL PARESIS	NERVOUS SYSTEM DISORDERS	2	11.73 ( 2.89 - 47.55 )	11.73 ( 19.25 )
LANGUAGE DISORDER	NERVOUS SYSTEM DISORDERS	2	50.34 ( 11.9 - 213.08 )	50.33 ( 89.26 )
TOE AMPUTATION	SURGICAL AND MEDICAL PROCEDURES	2	4.74 ( 1.18 - 19.05 )	4.74 ( 5.85 )
ESCHERICHIA PYELONEPHRITIS	INFECTIONS AND INFESTATIONS	2	75.52 ( 17.36 - 328.52 )	75.49 ( 130.67 )
VAGINAL HAEMORRHAGE	REPRODUCTIVE SYSTEM AND BREAST DISORDERS	2	1.61 ( 0.4 - 6.45 )	1.61 ( 0.46 )
LUNG ABSCESS	INFECTIONS AND INFESTATIONS	2	6.23 ( 1.55 - 25.09 )	6.23 ( 8.68 )
MYELODYSPLASTIC SYNDROME	NEOPLASMS BENIGN, MALIGNANT AND UNSPECIFIED (INCL CYSTS AND POLYPS)	2	2.56 ( 0.64 - 10.29 )	2.56 ( 1.9 )
RHEUMATOID LUNG	RESPIRATORY, THORACIC AND MEDIASTINAL DISORDERS	2	1.56 ( 0.39 - 6.25 )	1.56 ( 0.4 )
MYOCARDIAL ISCHAEMIA	CARDIAC DISORDERS	2	2.64 ( 0.66 - 10.58 )	2.64 ( 2.02 )
MIDDLE INSOMNIA	PSYCHIATRIC DISORDERS	2	3.12 ( 0.78 - 12.53 )	3.12 ( 2.87 )
JOINT DISLOCATION	INJURY, POISONING AND PROCEDURAL COMPLICATIONS	2	0.58 ( 0.15 - 2.33 )	0.58 ( 0.6 )
LIPIDS INCREASED	INVESTIGATIONS	2	9.99 ( 2.47 - 40.4 )	9.98 ( 15.9 )
UROSEPSIS	INFECTIONS AND INFESTATIONS	2	1.92 ( 0.48 - 7.69 )	1.92 ( 0.87 )
SUBARACHNOID HAEMORRHAGE	NERVOUS SYSTEM DISORDERS	2	4.27 ( 1.06 - 17.16 )	4.27 ( 4.97 )
ASPERGILLUS INFECTION	INFECTIONS AND INFESTATIONS	2	8.88 ( 2.2 - 35.89 )	8.88 ( 13.79 )
NECROTISING RETINITIS	EYE DISORDERS	2	31.8 ( 7.67 - 131.83 )	31.79 ( 56.65 )
PANCREATIC CARCINOMA METASTATIC	NEOPLASMS BENIGN, MALIGNANT AND UNSPECIFIED (INCL CYSTS AND POLYPS)	2	14.92 ( 3.67 - 60.68 )	14.91 ( 25.33 )
DRY SKIN	SKIN AND SUBCUTANEOUS TISSUE DISORDERS	2	0.5 ( 0.12 - 1.98 )	0.5 ( 1.03 )
BONE TUBERCULOSIS	INFECTIONS AND INFESTATIONS	2	20.14 ( 4.92 - 82.41 )	20.13 ( 35.19 )
DISSEMINATED TUBERCULOSIS	INFECTIONS AND INFESTATIONS	2	2.73 ( 0.68 - 10.94 )	2.73 ( 2.18 )
SPEECH DISORDER	NERVOUS SYSTEM DISORDERS	2	0.96 ( 0.24 - 3.84 )	0.96 ( 0 )
ENDOMETRIAL CANCER	NEOPLASMS BENIGN, MALIGNANT AND UNSPECIFIED (INCL CYSTS AND POLYPS)	2	7.5 ( 1.86 - 30.27 )	7.5 ( 11.13 )
SKIN DISCOLOURATION	SKIN AND SUBCUTANEOUS TISSUE DISORDERS	2	0.45 ( 0.11 - 1.81 )	0.45 ( 1.33 )
LEUKAEMIA	NEOPLASMS BENIGN, MALIGNANT AND UNSPECIFIED (INCL CYSTS AND POLYPS)	2	3.36 ( 0.84 - 13.47 )	3.36 ( 3.29 )
EMBOLISM ARTERIAL	VASCULAR DISORDERS	2	63.59 ( 14.81 - 273.09 )	63.57 ( 111.44 )
PERIPHERAL ARTERY THROMBOSIS	VASCULAR DISORDERS	2	27.46 ( 6.66 - 113.3 )	27.45 ( 48.76 )
PERIPHERAL EMBOLISM	VASCULAR DISORDERS	2	18.88 ( 4.62 - 77.15 )	18.87 ( 32.83 )
TONGUE NEOPLASM MALIGNANT STAGE UNSPECIFIED	NEOPLASMS BENIGN, MALIGNANT AND UNSPECIFIED (INCL CYSTS AND POLYPS)	2	9.29 ( 2.3 - 37.57 )	9.29 ( 14.57 )
FAECES SOFT	GASTROINTESTINAL DISORDERS	2	7.95 ( 1.97 - 32.08 )	7.95 ( 11.99 )
EMPHYSEMA	RESPIRATORY, THORACIC AND MEDIASTINAL DISORDERS	2	1.47 ( 0.37 - 5.87 )	1.47 ( 0.3 )
RHEUMATOID FACTOR INCREASED	INVESTIGATIONS	2	2.27 ( 0.57 - 9.11 )	2.27 ( 1.42 )
DECREASED IMMUNE RESPONSIVENESS	IMMUNE SYSTEM DISORDERS	2	1.06 ( 0.27 - 4.26 )	1.06 ( 0.01 )
PYELONEPHRITIS ACUTE	INFECTIONS AND INFESTATIONS	2	7.32 ( 1.82 - 29.53 )	7.32 ( 10.78 )
ANGINA UNSTABLE	CARDIAC DISORDERS	2	4.81 ( 1.2 - 19.36 )	4.81 ( 5.99 )
COLON CANCER	NEOPLASMS BENIGN, MALIGNANT AND UNSPECIFIED (INCL CYSTS AND POLYPS)	2	1.12 ( 0.28 - 4.47 )	1.12 ( 0.02 )
HEPATIC NEOPLASM	NEOPLASMS BENIGN, MALIGNANT AND UNSPECIFIED (INCL CYSTS AND POLYPS)	2	7.41 ( 1.84 - 29.9 )	7.41 ( 10.96 )
RECTAL ADENOCARCINOMA	NEOPLASMS BENIGN, MALIGNANT AND UNSPECIFIED (INCL CYSTS AND POLYPS)	2	22.8 ( 5.55 - 93.57 )	22.79 ( 40.15 )
DIVERTICULUM INTESTINAL HAEMORRHAGIC	GASTROINTESTINAL DISORDERS	2	17.77 ( 4.35 - 72.52 )	17.76 ( 30.73 )
ENTEROCOLITIS	GASTROINTESTINAL DISORDERS	2	7.07 ( 1.75 - 28.49 )	7.06 ( 10.29 )
ATRIAL SEPTAL DEFECT	CONGENITAL, FAMILIAL AND GENETIC DISORDERS	2	12.72 ( 3.13 - 51.61 )	12.71 ( 21.14 )
INTERVERTEBRAL DISC DEGENERATION	MUSCULOSKELETAL AND CONNECTIVE TISSUE DISORDERS	2	0.98 ( 0.24 - 3.92 )	0.98 ( 0 )
WHEEZING	RESPIRATORY, THORACIC AND MEDIASTINAL DISORDERS	2	0.42 ( 0.11 - 1.7 )	0.43 ( 1.55 )
OSTEOPOROTIC FRACTURE	MUSCULOSKELETAL AND CONNECTIVE TISSUE DISORDERS	2	4.33 ( 1.08 - 17.41 )	4.33 ( 5.08 )
TUMOUR MARKER INCREASED	INVESTIGATIONS	2	22.38 ( 5.45 - 91.8 )	22.37 ( 39.37 )
KNEE ARTHROPLASTY	SURGICAL AND MEDICAL PROCEDURES	2	0.19 ( 0.05 - 0.75 )	0.19 ( 7.04 )
CORONAVIRUS INFECTION	INFECTIONS AND INFESTATIONS	2	4.39 ( 1.09 - 17.66 )	4.39 ( 5.2 )
WRONG TECHNIQUE IN PRODUCT USAGE PROCESS	INJURY, POISONING AND PROCEDURAL COMPLICATIONS	2	0.13 ( 0.03 - 0.52 )	0.13 ( 11.78 )
RHABDOMYOLYSIS	MUSCULOSKELETAL AND CONNECTIVE TISSUE DISORDERS	2	5.92 ( 1.47 - 23.85 )	5.92 ( 8.1 )
REACTIVE GASTROPATHY	INJURY, POISONING AND PROCEDURAL COMPLICATIONS	2	23.24 ( 5.66 - 95.42 )	23.23 ( 40.97 )
RENAL CANCER	NEOPLASMS BENIGN, MALIGNANT AND UNSPECIFIED (INCL CYSTS AND POLYPS)	2	2.78 ( 0.69 - 11.17 )	2.78 ( 2.27 )
HYDRONEPHROSIS	RENAL AND URINARY DISORDERS	2	5.03 ( 1.25 - 20.25 )	5.03 ( 6.41 )
LYMPHANGIOSIS CARCINOMATOSA	NEOPLASMS BENIGN, MALIGNANT AND UNSPECIFIED (INCL CYSTS AND POLYPS)	2	172.61 ( 35.85 - 831.1 )	172.55 ( 265.31 )
PERICARDIAL EFFUSION	CARDIAC DISORDERS	2	1.33 ( 0.33 - 5.33 )	1.33 ( 0.16 )
LUNG SQUAMOUS CELL CARCINOMA METASTATIC	NEOPLASMS BENIGN, MALIGNANT AND UNSPECIFIED (INCL CYSTS AND POLYPS)	2	151.03 ( 32.07 - 711.41 )	150.98 ( 238.38 )
LUMBAR VERTEBRAL FRACTURE	INJURY, POISONING AND PROCEDURAL COMPLICATIONS	2	2.91 ( 0.73 - 11.68 )	2.91 ( 2.5 )
ACUTE GENERALISED EXANTHEMATOUS PUSTULOSIS	SKIN AND SUBCUTANEOUS TISSUE DISORDERS	2	19.18 ( 4.69 - 78.4 )	19.17 ( 33.39 )
INFECTIVE EXACERBATION OF CHRONIC OBSTRUCTIVE AIRWAYS DISEASE	INFECTIONS AND INFESTATIONS	2	16.55 ( 4.06 - 67.46 )	16.55 ( 28.43 )
HEPATIC LESION	HEPATOBILIARY DISORDERS	2	9.22 ( 2.28 - 37.28 )	9.22 ( 14.44 )
SYNOVITIS	MUSCULOSKELETAL AND CONNECTIVE TISSUE DISORDERS	2	0.11 ( 0.03 - 0.45 )	0.11 ( 14.15 )
COMA	NERVOUS SYSTEM DISORDERS	2	1.57 ( 0.39 - 6.31 )	1.57 ( 0.42 )
PAPILLOMA VIRAL INFECTION	INFECTIONS AND INFESTATIONS	2	10.89 ( 2.69 - 44.08 )	10.88 ( 17.63 )
STREPTOCOCCAL SEPSIS	INFECTIONS AND INFESTATIONS	2	14.05 ( 3.46 - 57.1 )	14.04 ( 23.68 )
INTRADUCTAL PROLIFERATIVE BREAST LESION	NEOPLASMS BENIGN, MALIGNANT AND UNSPECIFIED (INCL CYSTS AND POLYPS)	2	9.08 ( 2.25 - 36.71 )	9.08 ( 14.17 )
VULVAL CANCER	NEOPLASMS BENIGN, MALIGNANT AND UNSPECIFIED (INCL CYSTS AND POLYPS)	2	15.9 ( 3.9 - 64.75 )	15.89 ( 27.2 )
CEREBRAL THROMBOSIS	NERVOUS SYSTEM DISORDERS	2	8.45 ( 2.09 - 34.12 )	8.45 ( 12.95 )
THERAPEUTIC PRODUCT EFFECT DECREASED	GENERAL DISORDERS AND ADMINISTRATION SITE CONDITIONS	2	0.12 ( 0.03 - 0.46 )	0.12 ( 13.44 )
NORMOCHROMIC NORMOCYTIC ANAEMIA	BLOOD AND LYMPHATIC SYSTEM DISORDERS	2	10.6 ( 2.62 - 42.91 )	10.6 ( 17.08 )
MARGINAL ZONE LYMPHOMA	NEOPLASMS BENIGN, MALIGNANT AND UNSPECIFIED (INCL CYSTS AND POLYPS)	2	48.33 ( 11.44 - 204.1 )	48.31 ( 85.81 )
LUNG OPACITY	RESPIRATORY, THORACIC AND MEDIASTINAL DISORDERS	2	17.02 ( 4.17 - 69.39 )	17.01 ( 29.32 )
INFARCTION	VASCULAR DISORDERS	2	2.48 ( 0.62 - 9.95 )	2.48 ( 1.76 )
RHEUMATOID ARTHRITIS-ASSOCIATED INTERSTITIAL LUNG DISEASE	RESPIRATORY, THORACIC AND MEDIASTINAL DISORDERS	2	23.69 ( 5.77 - 97.34 )	23.68 ( 41.81 )
THORACIC VERTEBRAL FRACTURE	INJURY, POISONING AND PROCEDURAL COMPLICATIONS	2	5.08 ( 1.26 - 20.42 )	5.07 ( 6.49 )
POLYARTHRITIS	MUSCULOSKELETAL AND CONNECTIVE TISSUE DISORDERS	2	1.52 ( 0.38 - 6.08 )	1.52 ( 0.35 )
FOLLICULITIS	INFECTIONS AND INFESTATIONS	2	0.34 ( 0.08 - 1.35 )	0.34 ( 2.59 )
TUBERCULOUS PLEURISY	INFECTIONS AND INFESTATIONS	1	4.68 ( 0.65 - 33.5 )	4.68 ( 2.87 )
ENTEROCOCCAL SEPSIS	INFECTIONS AND INFESTATIONS	1	19.48 ( 2.66 - 142.76 )	19.48 ( 16.98 )
CIRCULATORY COLLAPSE	VASCULAR DISORDERS	1	2.39 ( 0.33 - 17.02 )	2.39 ( 0.8 )
ROTATOR CUFF SYNDROME	MUSCULOSKELETAL AND CONNECTIVE TISSUE DISORDERS	1	0.29 ( 0.04 - 2.04 )	0.29 ( 1.77 )
PYODERMA	INFECTIONS AND INFESTATIONS	1	26.26 ( 3.55 - 194.5 )	26.26 ( 23.28 )
PAPULE	SKIN AND SUBCUTANEOUS TISSUE DISORDERS	1	1.54 ( 0.22 - 10.94 )	1.54 ( 0.19 )
ANAEMIA VITAMIN B12 DEFICIENCY	BLOOD AND LYMPHATIC SYSTEM DISORDERS	1	37.75 ( 5.01 - 284.73 )	37.75 ( 33.67 )
VITAMIN B12 DEFICIENCY	METABOLISM AND NUTRITION DISORDERS	1	3.68 ( 0.52 - 26.31 )	3.68 ( 1.94 )
DRY EYE	EYE DISORDERS	1	0.22 ( 0.03 - 1.54 )	0.22 ( 2.83 )
EPISCLERITIS	EYE DISORDERS	1	5.39 ( 0.75 - 38.63 )	5.39 ( 3.55 )
CATARACT SUBCAPSULAR	EYE DISORDERS	1	75.5 ( 9.44 - 603.8 )	75.49 ( 65.34 )
IRIDOCYCLITIS	EYE DISORDERS	1	7.46 ( 1.04 - 53.59 )	7.46 ( 5.52 )
SCINTILLATING SCOTOMA	EYE DISORDERS	1	100.67 ( 12.12 - 836.37 )	100.65 ( 84.57 )
OBSTRUCTIVE AIRWAYS DISORDER	RESPIRATORY, THORACIC AND MEDIASTINAL DISORDERS	1	2.98 ( 0.42 - 21.23 )	2.97 ( 1.3 )
CEREBRAL ISCHAEMIA	NERVOUS SYSTEM DISORDERS	1	3.75 ( 0.53 - 26.8 )	3.75 ( 2.01 )
CEREBROVASCULAR DISORDER	NERVOUS SYSTEM DISORDERS	1	4.79 ( 0.67 - 34.3 )	4.79 ( 2.98 )
EYE HAEMORRHAGE	EYE DISORDERS	1	1.09 ( 0.15 - 7.74 )	1.09 ( 0.01 )
VASCULAR FRAGILITY	VASCULAR DISORDERS	1	37.75 ( 5.01 - 284.73 )	37.75 ( 33.67 )
PARONYCHIA	INFECTIONS AND INFESTATIONS	1	3.36 ( 0.47 - 23.96 )	3.36 ( 1.64 )
PENILE ABSCESS	INFECTIONS AND INFESTATIONS	1	302.01 ( 27.38 - 3331.31 )	301.96 ( 199.98 )
COLON CANCER STAGE III	NEOPLASMS BENIGN, MALIGNANT AND UNSPECIFIED (INCL CYSTS AND POLYPS)	1	31.79 ( 4.25 - 237.52 )	31.79 ( 28.33 )
DERMAL CYST	SKIN AND SUBCUTANEOUS TISSUE DISORDERS	1	2.16 ( 0.3 - 15.43 )	2.16 ( 0.62 )
ANEURYSM	VASCULAR DISORDERS	1	1.73 ( 0.24 - 12.29 )	1.73 ( 0.3 )
HEMIANOPIA	NERVOUS SYSTEM DISORDERS	1	27.46 ( 3.7 - 203.73 )	27.45 ( 24.38 )
CHOLANGIOCARCINOMA	NEOPLASMS BENIGN, MALIGNANT AND UNSPECIFIED (INCL CYSTS AND POLYPS)	1	9.74 ( 1.35 - 70.27 )	9.74 ( 7.72 )
ROAD TRAFFIC ACCIDENT	INJURY, POISONING AND PROCEDURAL COMPLICATIONS	1	0.19 ( 0.03 - 1.34 )	0.19 ( 3.48 )
MULTIPLE SCLEROSIS RELAPSE	NERVOUS SYSTEM DISORDERS	1	8.16 ( 1.13 - 58.73 )	8.16 ( 6.2 )
OCULAR DISCOMFORT	EYE DISORDERS	1	2.44 ( 0.34 - 17.36 )	2.44 ( 0.84 )
CAMPYLOBACTER GASTROENTERITIS	INFECTIONS AND INFESTATIONS	1	28.76 ( 3.87 - 213.88 )	28.76 ( 25.58 )
DRUG REACTION WITH EOSINOPHILIA AND SYSTEMIC SYMPTOMS	SKIN AND SUBCUTANEOUS TISSUE DISORDERS	1	2.48 ( 0.35 - 17.65 )	2.48 ( 0.88 )
TERTIARY SYPHILIS	INFECTIONS AND INFESTATIONS	1	Inf ( NaN - Inf )	Inf ( 603.92 )
TOXICITY TO VARIOUS AGENTS	INJURY, POISONING AND PROCEDURAL COMPLICATIONS	1	0.35 ( 0.05 - 2.5 )	0.35 ( 1.2 )
JOINT RANGE OF MOTION DECREASED	MUSCULOSKELETAL AND CONNECTIVE TISSUE DISORDERS	1	0.14 ( 0.02 - 0.97 )	0.14 ( 5.44 )
ABSCESS SOFT TISSUE	INFECTIONS AND INFESTATIONS	1	21.57 ( 2.93 - 158.58 )	21.57 ( 18.94 )
CLAVICLE FRACTURE	INJURY, POISONING AND PROCEDURAL COMPLICATIONS	1	2.07 ( 0.29 - 14.74 )	2.07 ( 0.55 )
ENCEPHALOPATHY	NERVOUS SYSTEM DISORDERS	1	2.31 ( 0.32 - 16.49 )	2.31 ( 0.74 )
HYPERSENSITIVITY PNEUMONITIS	RESPIRATORY, THORACIC AND MEDIASTINAL DISORDERS	1	6.36 ( 0.89 - 45.61 )	6.36 ( 4.47 )
TOOTH INJURY	INJURY, POISONING AND PROCEDURAL COMPLICATIONS	1	4.41 ( 0.62 - 31.53 )	4.41 ( 2.62 )
ORAL SURGERY	SURGICAL AND MEDICAL PROCEDURES	1	2.23 ( 0.31 - 15.88 )	2.23 ( 0.67 )
HUMAN HERPESVIRUS 6 INFECTION	INFECTIONS AND INFESTATIONS	1	33.56 ( 4.48 - 251.42 )	33.55 ( 29.92 )
FACE INJURY	INJURY, POISONING AND PROCEDURAL COMPLICATIONS	1	2.9 ( 0.41 - 20.72 )	2.9 ( 1.24 )
LIP DISORDER	GASTROINTESTINAL DISORDERS	1	8.39 ( 1.17 - 60.38 )	8.39 ( 6.42 )
EMERGENCY CARE EXAMINATION	INVESTIGATIONS	1	302.01 ( 27.38 - 3331.31 )	301.96 ( 199.98 )
SEPTIC ARTHRITIS STAPHYLOCOCCAL	INFECTIONS AND INFESTATIONS	1	5.12 ( 0.71 - 36.65 )	5.12 ( 3.29 )
DIFFUSE LARGE B-CELL LYMPHOMA STAGE I	NEOPLASMS BENIGN, MALIGNANT AND UNSPECIFIED (INCL CYSTS AND POLYPS)	1	75.5 ( 9.44 - 603.8 )	75.49 ( 65.34 )
DIPLOPIA	EYE DISORDERS	1	0.88 ( 0.12 - 6.29 )	0.88 ( 0.02 )
DROPPED HEAD SYNDROME	NERVOUS SYSTEM DISORDERS	1	151.01 ( 16.87 - 1351.32 )	150.98 ( 119.19 )
GINGIVAL DISORDER	GASTROINTESTINAL DISORDERS	1	2.52 ( 0.35 - 17.94 )	2.52 ( 0.91 )
QUADRIPLEGIA	NERVOUS SYSTEM DISORDERS	1	15.9 ( 2.18 - 115.8 )	15.89 ( 13.6 )
NONINFECTIVE GINGIVITIS	GASTROINTESTINAL DISORDERS	1	5.98 ( 0.83 - 42.88 )	5.98 ( 4.11 )
PNEUMONIA LEGIONELLA	INFECTIONS AND INFESTATIONS	1	2.13 ( 0.3 - 15.21 )	2.13 ( 0.6 )
TONGUE DISCOMFORT	GASTROINTESTINAL DISORDERS	1	7.02 ( 0.98 - 50.44 )	7.02 ( 5.11 )
CARDIAC ANEURYSM	CARDIAC DISORDERS	1	10.24 ( 1.42 - 73.91 )	10.24 ( 8.19 )
ELECTROCARDIOGRAM PR PROLONGATION	INVESTIGATIONS	1	302.01 ( 27.38 - 3331.31 )	301.96 ( 199.98 )
OESOPHAGEAL SQUAMOUS CELL CARCINOMA STAGE I	NEOPLASMS BENIGN, MALIGNANT AND UNSPECIFIED (INCL CYSTS AND POLYPS)	1	Inf ( NaN - Inf )	Inf ( 603.92 )
PLEURISY	RESPIRATORY, THORACIC AND MEDIASTINAL DISORDERS	1	0.61 ( 0.09 - 4.36 )	0.61 ( 0.24 )
INTESTINAL OBSTRUCTION	GASTROINTESTINAL DISORDERS	1	0.54 ( 0.08 - 3.84 )	0.54 ( 0.39 )
DEAFNESS NEUROSENSORY	EAR AND LABYRINTH DISORDERS	1	2.41 ( 0.34 - 17.15 )	2.41 ( 0.82 )
TRIGEMINAL NEURALGIA	NERVOUS SYSTEM DISORDERS	1	4.68 ( 0.65 - 33.5 )	4.68 ( 2.87 )
MOVEMENT DISORDER	NERVOUS SYSTEM DISORDERS	1	0.41 ( 0.06 - 2.89 )	0.41 ( 0.87 )
VAGINAL DISORDER	REPRODUCTIVE SYSTEM AND BREAST DISORDERS	1	10.79 ( 1.49 - 77.93 )	10.78 ( 8.72 )
DEVICE RELATED INFECTION	INFECTIONS AND INFESTATIONS	1	0.8 ( 0.11 - 5.69 )	0.8 ( 0.05 )
IMMUNOSUPPRESSION	IMMUNE SYSTEM DISORDERS	1	0.48 ( 0.07 - 3.39 )	0.48 ( 0.57 )
STOMACH MASS	GASTROINTESTINAL DISORDERS	1	9.44 ( 1.31 - 68.04 )	9.44 ( 7.43 )
MENINGITIS HERPES	INFECTIONS AND INFESTATIONS	1	60.4 ( 7.73 - 471.95 )	60.39 ( 53.1 )
RENAL PAIN	RENAL AND URINARY DISORDERS	1	1.28 ( 0.18 - 9.09 )	1.28 ( 0.06 )
METASTASES TO ABDOMINAL WALL	NEOPLASMS BENIGN, MALIGNANT AND UNSPECIFIED (INCL CYSTS AND POLYPS)	1	Inf ( NaN - Inf )	Inf ( 603.92 )
RECTOSIGMOID CANCER STAGE IV	NEOPLASMS BENIGN, MALIGNANT AND UNSPECIFIED (INCL CYSTS AND POLYPS)	1	Inf ( NaN - Inf )	Inf ( 603.92 )
ENCEPHALITIS AUTOIMMUNE	NERVOUS SYSTEM DISORDERS	1	33.56 ( 4.48 - 251.42 )	33.55 ( 29.92 )
IRRITABILITY	PSYCHIATRIC DISORDERS	1	0.85 ( 0.12 - 6.03 )	0.85 ( 0.03 )
MOLE EXCISION	SURGICAL AND MEDICAL PROCEDURES	1	19.48 ( 2.66 - 142.76 )	19.48 ( 16.98 )
POST PROCEDURAL CONTUSION	INJURY, POISONING AND PROCEDURAL COMPLICATIONS	1	11.62 ( 1.61 - 84.04 )	11.61 ( 9.52 )
POST PROCEDURAL HAEMORRHAGE	INJURY, POISONING AND PROCEDURAL COMPLICATIONS	1	1.68 ( 0.24 - 11.98 )	1.68 ( 0.28 )
SUBDURAL HAEMORRHAGE	INJURY, POISONING AND PROCEDURAL COMPLICATIONS	1	30.2 ( 4.05 - 225.08 )	30.2 ( 26.89 )
PULMONARY PAIN	RESPIRATORY, THORACIC AND MEDIASTINAL DISORDERS	1	2.13 ( 0.3 - 15.15 )	2.13 ( 0.59 )
LEFT VENTRICULAR DYSFUNCTION	CARDIAC DISORDERS	1	3.9 ( 0.55 - 27.84 )	3.9 ( 2.14 )
VENTRICULAR EXTRASYSTOLES	CARDIAC DISORDERS	1	2.68 ( 0.38 - 19.14 )	2.68 ( 1.05 )
INCREASED BRONCHIAL SECRETION	RESPIRATORY, THORACIC AND MEDIASTINAL DISORDERS	1	6.64 ( 0.92 - 47.64 )	6.64 ( 4.74 )
MEAN CELL VOLUME DECREASED	INVESTIGATIONS	1	6.36 ( 0.89 - 45.61 )	6.36 ( 4.47 )
ENDOCARDITIS STAPHYLOCOCCAL	INFECTIONS AND INFESTATIONS	1	20.83 ( 2.84 - 152.93 )	20.82 ( 18.24 )
PNEUMONIA STAPHYLOCOCCAL	INFECTIONS AND INFESTATIONS	1	4.14 ( 0.58 - 29.57 )	4.14 ( 2.36 )
IRRITABLE BOWEL SYNDROME	GASTROINTESTINAL DISORDERS	1	0.15 ( 0.02 - 1.08 )	0.15 ( 4.74 )
URINARY INCONTINENCE	RENAL AND URINARY DISORDERS	1	0.73 ( 0.1 - 5.22 )	0.73 ( 0.1 )
POLYCYTHAEMIA VERA	NEOPLASMS BENIGN, MALIGNANT AND UNSPECIFIED (INCL CYSTS AND POLYPS)	1	19.48 ( 2.66 - 142.76 )	19.48 ( 16.98 )
FUNGAL SKIN INFECTION	INFECTIONS AND INFESTATIONS	1	1.17 ( 0.17 - 8.36 )	1.17 ( 0.03 )
INTESTINAL MASS	GASTROINTESTINAL DISORDERS	1	6.36 ( 0.89 - 45.61 )	6.36 ( 4.47 )
SCRATCH	INJURY, POISONING AND PROCEDURAL COMPLICATIONS	1	0.91 ( 0.13 - 6.45 )	0.91 ( 0.01 )
ENTERITIS	GASTROINTESTINAL DISORDERS	1	3.8 ( 0.53 - 27.14 )	3.8 ( 2.05 )
GASTRIC CANCER STAGE I	NEOPLASMS BENIGN, MALIGNANT AND UNSPECIFIED (INCL CYSTS AND POLYPS)	1	201.34 ( 20.94 - 1936 )	201.31 ( 149.48 )
TREATMENT FAILURE	GENERAL DISORDERS AND ADMINISTRATION SITE CONDITIONS	1	0.05 ( 0.01 - 0.34 )	0.05 ( 18.98 )
ESSENTIAL THROMBOCYTHAEMIA	NEOPLASMS BENIGN, MALIGNANT AND UNSPECIFIED (INCL CYSTS AND POLYPS)	1	50.34 ( 6.54 - 387.19 )	50.33 ( 44.63 )
UPPER RESPIRATORY TRACT INFECTION BACTERIAL	INFECTIONS AND INFESTATIONS	1	25.17 ( 3.4 - 186.08 )	25.16 ( 22.28 )
COLITIS MICROSCOPIC	GASTROINTESTINAL DISORDERS	1	1.54 ( 0.22 - 11 )	1.54 ( 0.19 )
POST PROCEDURAL PULMONARY EMBOLISM	INJURY, POISONING AND PROCEDURAL COMPLICATIONS	1	28.76 ( 3.87 - 213.88 )	28.76 ( 25.58 )
NIGHT SWEATS	SKIN AND SUBCUTANEOUS TISSUE DISORDERS	1	0.21 ( 0.03 - 1.48 )	0.21 ( 3 )
ORAL MUCOSAL BLISTERING	GASTROINTESTINAL DISORDERS	1	1.57 ( 0.22 - 11.17 )	1.57 ( 0.21 )
PRODUCT DISTRIBUTION ISSUE	PRODUCT ISSUES	1	2.89 ( 0.41 - 20.62 )	2.89 ( 1.23 )
INFECTED SKIN ULCER	INFECTIONS AND INFESTATIONS	1	1.95 ( 0.27 - 13.92 )	1.95 ( 0.46 )
HAEMORRHAGE SUBCUTANEOUS	SKIN AND SUBCUTANEOUS TISSUE DISORDERS	1	4.58 ( 0.64 - 32.73 )	4.58 ( 2.77 )
PARKINSON'S DISEASE	NERVOUS SYSTEM DISORDERS	1	1.4 ( 0.2 - 9.97 )	1.4 ( 0.11 )
BLOOD PRESSURE ABNORMAL	INVESTIGATIONS	1	0.54 ( 0.08 - 3.87 )	0.54 ( 0.38 )
GENITAL HERPES ZOSTER	INFECTIONS AND INFESTATIONS	1	50.34 ( 6.54 - 387.19 )	50.33 ( 44.63 )
MORPHOEA	MUSCULOSKELETAL AND CONNECTIVE TISSUE DISORDERS	1	25.17 ( 3.4 - 186.08 )	25.16 ( 22.28 )
TOOTH ABSCESS	INFECTIONS AND INFESTATIONS	1	0.39 ( 0.05 - 2.76 )	0.39 ( 0.96 )
LYMPHOCYTE COUNT INCREASED	INVESTIGATIONS	1	4.11 ( 0.57 - 29.37 )	4.11 ( 2.34 )
MOTION SICKNESS	EAR AND LABYRINTH DISORDERS	1	14.38 ( 1.98 - 104.51 )	14.38 ( 12.16 )
BODY TEMPERATURE DECREASED	INVESTIGATIONS	1	0.58 ( 0.08 - 4.12 )	0.58 ( 0.3 )
NASAL SEPTAL OPERATION	SURGICAL AND MEDICAL PROCEDURES	1	23.23 ( 3.15 - 171.23 )	23.23 ( 20.48 )
PELVIC MASS	GENERAL DISORDERS AND ADMINISTRATION SITE CONDITIONS	1	13.13 ( 1.81 - 95.23 )	13.13 ( 10.97 )
HAEMORRHAGE	VASCULAR DISORDERS	1	0.25 ( 0.03 - 1.75 )	0.25 ( 2.3 )
HEPATIC INFARCTION	HEPATOBILIARY DISORDERS	1	27.46 ( 3.7 - 203.73 )	27.45 ( 24.38 )
SPLENIC INFARCTION	BLOOD AND LYMPHATIC SYSTEM DISORDERS	1	12.08 ( 1.67 - 87.47 )	12.08 ( 9.96 )
GENERAL PHYSICAL CONDITION ABNORMAL	INVESTIGATIONS	1	2.48 ( 0.35 - 17.65 )	2.48 ( 0.88 )
ACUTE LYMPHOCYTIC LEUKAEMIA	NEOPLASMS BENIGN, MALIGNANT AND UNSPECIFIED (INCL CYSTS AND POLYPS)	1	18.3 ( 2.5 - 133.85 )	18.3 ( 15.87 )
DUODENAL OBSTRUCTION	GASTROINTESTINAL DISORDERS	1	302.01 ( 27.38 - 3331.31 )	301.96 ( 199.98 )
MALIGNANT ASCITES	GASTROINTESTINAL DISORDERS	1	28.76 ( 3.87 - 213.88 )	28.76 ( 25.58 )
ANAL ABSCESS	INFECTIONS AND INFESTATIONS	1	2.61 ( 0.37 - 18.64 )	2.61 ( 0.99 )
MUCOSAL DISORDER	GENERAL DISORDERS AND ADMINISTRATION SITE CONDITIONS	1	15.49 ( 2.13 - 112.75 )	15.49 ( 13.21 )
INJURY	INJURY, POISONING AND PROCEDURAL COMPLICATIONS	1	0.21 ( 0.03 - 1.52 )	0.21 ( 2.9 )
PRODUCT SUPPLY ISSUE	PRODUCT ISSUES	1	4.25 ( 0.59 - 30.41 )	4.25 ( 2.47 )
EPITHELIOID MESOTHELIOMA	NEOPLASMS BENIGN, MALIGNANT AND UNSPECIFIED (INCL CYSTS AND POLYPS)	1	Inf ( NaN - Inf )	Inf ( 603.92 )
HEPATIC ENCEPHALOPATHY	NERVOUS SYSTEM DISORDERS	1	8.05 ( 1.12 - 57.93 )	8.05 ( 6.1 )
DISEASE RECURRENCE	GENERAL DISORDERS AND ADMINISTRATION SITE CONDITIONS	1	0.59 ( 0.08 - 4.19 )	0.59 ( 0.29 )
OVARIAN ADENOMA	NEOPLASMS BENIGN, MALIGNANT AND UNSPECIFIED (INCL CYSTS AND POLYPS)	1	25.17 ( 3.4 - 186.08 )	25.16 ( 22.28 )
ILIAC ARTERY OCCLUSION	VASCULAR DISORDERS	1	20.83 ( 2.84 - 152.93 )	20.82 ( 18.24 )
FUNCTIONAL GASTROINTESTINAL DISORDER	GASTROINTESTINAL DISORDERS	1	3.26 ( 0.46 - 23.31 )	3.26 ( 1.56 )
ACUTE HEPATIC FAILURE	HEPATOBILIARY DISORDERS	1	3.68 ( 0.52 - 26.31 )	3.68 ( 1.94 )
ACUTE SINUSITIS	INFECTIONS AND INFESTATIONS	1	6.23 ( 0.87 - 44.66 )	6.23 ( 4.34 )
BETA HAEMOLYTIC STREPTOCOCCAL INFECTION	INFECTIONS AND INFESTATIONS	1	5.49 ( 0.77 - 39.34 )	5.49 ( 3.64 )
CARDIOMYOPATHY	CARDIAC DISORDERS	1	1.35 ( 0.19 - 9.57 )	1.35 ( 0.09 )
CARDIOPULMONARY FAILURE	CARDIAC DISORDERS	1	5.75 ( 0.8 - 41.23 )	5.75 ( 3.89 )
CARDIOVASCULAR INSUFFICIENCY	CARDIAC DISORDERS	1	13.13 ( 1.81 - 95.23 )	13.13 ( 10.97 )
HAEMODYNAMIC INSTABILITY	VASCULAR DISORDERS	1	8.63 ( 1.2 - 62.13 )	8.63 ( 6.65 )
HYPERVOLAEMIA	METABOLISM AND NUTRITION DISORDERS	1	27.46 ( 3.7 - 203.73 )	27.45 ( 24.38 )
HYPOALBUMINAEMIA	METABOLISM AND NUTRITION DISORDERS	1	4.19 ( 0.59 - 29.99 )	4.19 ( 2.42 )
LACTIC ACIDOSIS	METABOLISM AND NUTRITION DISORDERS	1	5.3 ( 0.74 - 37.95 )	5.3 ( 3.46 )
MYOGLOBINAEMIA	MUSCULOSKELETAL AND CONNECTIVE TISSUE DISORDERS	1	604.03 ( 37.77 - 9658.63 )	603.92 ( 300.96 )
PERICARDIAL FIBROSIS	CARDIAC DISORDERS	1	86.29 ( 10.61 - 701.49 )	86.27 ( 73.75 )
PHARYNGITIS	INFECTIONS AND INFESTATIONS	1	0.29 ( 0.04 - 2.09 )	0.29 ( 1.69 )
TOXIC SHOCK SYNDROME	INFECTIONS AND INFESTATIONS	1	13.73 ( 1.89 - 99.66 )	13.73 ( 11.54 )
ANENCEPHALY	CONGENITAL, FAMILIAL AND GENETIC DISORDERS	1	54.91 ( 7.09 - 425.41 )	54.9 ( 48.51 )
MYCOBACTERIUM TUBERCULOSIS COMPLEX TEST POSITIVE	INVESTIGATIONS	1	1.18 ( 0.17 - 8.41 )	1.18 ( 0.03 )
LYMPHADENITIS	BLOOD AND LYMPHATIC SYSTEM DISORDERS	1	3.82 ( 0.54 - 27.31 )	3.82 ( 2.07 )
PURULENT DISCHARGE	INFECTIONS AND INFESTATIONS	1	1.73 ( 0.24 - 12.29 )	1.73 ( 0.3 )
EYE OPERATION	SURGICAL AND MEDICAL PROCEDURES	1	1.27 ( 0.18 - 9.05 )	1.27 ( 0.06 )
AGGRESSION	PSYCHIATRIC DISORDERS	1	3.1 ( 0.43 - 22.1 )	3.1 ( 1.41 )
ANGER	PSYCHIATRIC DISORDERS	1	1.61 ( 0.23 - 11.47 )	1.61 ( 0.23 )
CHEST X-RAY ABNORMAL	INVESTIGATIONS	1	1.89 ( 0.26 - 13.44 )	1.89 ( 0.42 )
ABSCESS NECK	INFECTIONS AND INFESTATIONS	1	12.33 ( 1.7 - 89.29 )	12.32 ( 10.2 )
BREAST CANCER STAGE I	NEOPLASMS BENIGN, MALIGNANT AND UNSPECIFIED (INCL CYSTS AND POLYPS)	1	6.49 ( 0.91 - 46.6 )	6.49 ( 4.6 )
DEAFNESS UNILATERAL	EAR AND LABYRINTH DISORDERS	1	1.75 ( 0.25 - 12.43 )	1.75 ( 0.32 )
BILE DUCT STONE	HEPATOBILIARY DISORDERS	1	3.1 ( 0.43 - 22.1 )	3.1 ( 1.41 )
ECCHYMOSIS	SKIN AND SUBCUTANEOUS TISSUE DISORDERS	1	2.23 ( 0.31 - 15.88 )	2.23 ( 0.67 )
TOOTH EXTRACTION	SURGICAL AND MEDICAL PROCEDURES	1	0.54 ( 0.08 - 3.81 )	0.54 ( 0.4 )
ADRENAL INSUFFICIENCY	ENDOCRINE DISORDERS	1	1.23 ( 0.17 - 8.75 )	1.23 ( 0.04 )
LARYNGITIS	INFECTIONS AND INFESTATIONS	1	0.39 ( 0.05 - 2.74 )	0.39 ( 0.98 )
PARAESTHESIA ORAL	GASTROINTESTINAL DISORDERS	1	1.45 ( 0.2 - 10.33 )	1.45 ( 0.14 )
INJECTION SITE SWELLING	GENERAL DISORDERS AND ADMINISTRATION SITE CONDITIONS	1	0.04 ( 0.01 - 0.26 )	0.04 ( 25.21 )
TYPE III IMMUNE COMPLEX MEDIATED REACTION	IMMUNE SYSTEM DISORDERS	1	86.29 ( 10.61 - 701.49 )	86.27 ( 73.75 )
COLON CANCER METASTATIC	NEOPLASMS BENIGN, MALIGNANT AND UNSPECIFIED (INCL CYSTS AND POLYPS)	1	5.98 ( 0.83 - 42.88 )	5.98 ( 4.11 )
HODGKIN'S DISEASE	NEOPLASMS BENIGN, MALIGNANT AND UNSPECIFIED (INCL CYSTS AND POLYPS)	1	1.26 ( 0.18 - 8.97 )	1.26 ( 0.05 )
BLASTOMYCOSIS	INFECTIONS AND INFESTATIONS	1	26.26 ( 3.55 - 194.5 )	26.26 ( 23.28 )
VULVOVAGINAL PRURITUS	REPRODUCTIVE SYSTEM AND BREAST DISORDERS	1	3.28 ( 0.46 - 23.43 )	3.28 ( 1.58 )
RENAL SURGERY	SURGICAL AND MEDICAL PROCEDURES	1	14.73 ( 2.03 - 107.12 )	14.73 ( 12.49 )
MUMPS	INFECTIONS AND INFESTATIONS	1	18.3 ( 2.5 - 133.85 )	18.3 ( 15.87 )
MENIERE'S DISEASE	EAR AND LABYRINTH DISORDERS	1	5.49 ( 0.77 - 39.34 )	5.49 ( 3.64 )
VIRAL PERICARDITIS	INFECTIONS AND INFESTATIONS	1	46.46 ( 6.08 - 355.25 )	46.46 ( 41.3 )
BONE MARROW FAILURE	BLOOD AND LYMPHATIC SYSTEM DISORDERS	1	1.01 ( 0.14 - 7.16 )	1.01 ( 0 )
NEOPLASM	NEOPLASMS BENIGN, MALIGNANT AND UNSPECIFIED (INCL CYSTS AND POLYPS)	1	0.82 ( 0.12 - 5.82 )	0.82 ( 0.04 )
SCLERODERMA	MUSCULOSKELETAL AND CONNECTIVE TISSUE DISORDERS	1	3.13 ( 0.44 - 22.33 )	3.13 ( 1.44 )
TONSILLITIS	INFECTIONS AND INFESTATIONS	1	1.14 ( 0.16 - 8.08 )	1.14 ( 0.02 )
SHOULDER OPERATION	SURGICAL AND MEDICAL PROCEDURES	1	0.87 ( 0.12 - 6.2 )	0.87 ( 0.02 )
IMMUNE RECONSTITUTION INFLAMMATORY SYNDROME	IMMUNE SYSTEM DISORDERS	1	4.08 ( 0.57 - 29.17 )	4.08 ( 2.31 )
NECK MASS	MUSCULOSKELETAL AND CONNECTIVE TISSUE DISORDERS	1	1.7 ( 0.24 - 12.08 )	1.7 ( 0.29 )
URINE FLOW DECREASED	RENAL AND URINARY DISORDERS	1	18.88 ( 2.58 - 138.16 )	18.87 ( 16.41 )
FEELING JITTERY	GENERAL DISORDERS AND ADMINISTRATION SITE CONDITIONS	1	1.44 ( 0.2 - 10.26 )	1.44 ( 0.13 )
DYSARTHRIA	NERVOUS SYSTEM DISORDERS	1	0.95 ( 0.13 - 6.75 )	0.95 ( 0 )
REVERSIBLE ISCHAEMIC NEUROLOGICAL DEFICIT	NERVOUS SYSTEM DISORDERS	1	86.29 ( 10.61 - 701.49 )	86.27 ( 73.75 )
GASTROINTESTINAL LYMPHOMA	NEOPLASMS BENIGN, MALIGNANT AND UNSPECIFIED (INCL CYSTS AND POLYPS)	1	33.56 ( 4.48 - 251.42 )	33.55 ( 29.92 )
CORNEAL ABRASION	INJURY, POISONING AND PROCEDURAL COMPLICATIONS	1	9.02 ( 1.25 - 64.95 )	9.01 ( 7.02 )
DISORGANISED SPEECH	PSYCHIATRIC DISORDERS	1	46.46 ( 6.08 - 355.25 )	46.46 ( 41.3 )
NAIL DISORDER	SKIN AND SUBCUTANEOUS TISSUE DISORDERS	1	0.64 ( 0.09 - 4.55 )	0.64 ( 0.2 )
SLEEP DISORDER	PSYCHIATRIC DISORDERS	1	0.14 ( 0.02 - 1 )	0.14 ( 5.24 )
METASTASES TO CENTRAL NERVOUS SYSTEM	NEOPLASMS BENIGN, MALIGNANT AND UNSPECIFIED (INCL CYSTS AND POLYPS)	1	3.62 ( 0.51 - 25.83 )	3.62 ( 1.88 )
TRANCE	PSYCHIATRIC DISORDERS	1	Inf ( NaN - Inf )	Inf ( 603.92 )
IMMUNOGLOBULINS ABNORMAL	INVESTIGATIONS	1	54.91 ( 7.09 - 425.41 )	54.9 ( 48.51 )
BONE MARROW OEDEMA	BLOOD AND LYMPHATIC SYSTEM DISORDERS	1	9.15 ( 1.27 - 65.95 )	9.15 ( 7.15 )
HYPOCALCAEMIA	METABOLISM AND NUTRITION DISORDERS	1	2.48 ( 0.35 - 17.65 )	2.48 ( 0.88 )
HYPOMAGNESAEMIA	METABOLISM AND NUTRITION DISORDERS	1	6.86 ( 0.96 - 49.28 )	6.86 ( 4.95 )
IRON DEFICIENCY	METABOLISM AND NUTRITION DISORDERS	1	2.43 ( 0.34 - 17.29 )	2.43 ( 0.83 )
NORMOCYTIC ANAEMIA	BLOOD AND LYMPHATIC SYSTEM DISORDERS	1	12.58 ( 1.74 - 91.19 )	12.58 ( 10.44 )
SYSTEMIC INFLAMMATORY RESPONSE SYNDROME	GENERAL DISORDERS AND ADMINISTRATION SITE CONDITIONS	1	4.25 ( 0.59 - 30.41 )	4.25 ( 2.47 )
FIBRIN D DIMER INCREASED	INVESTIGATIONS	1	4.28 ( 0.6 - 30.63 )	4.28 ( 2.5 )
BRONCHOPNEUMOPATHY	RESPIRATORY, THORACIC AND MEDIASTINAL DISORDERS	1	28.76 ( 3.87 - 213.88 )	28.76 ( 25.58 )
RESPIRATORY DISTRESS	RESPIRATORY, THORACIC AND MEDIASTINAL DISORDERS	1	1.09 ( 0.15 - 7.73 )	1.09 ( 0.01 )
MENINGITIS LISTERIA	INFECTIONS AND INFESTATIONS	1	10.98 ( 1.52 - 79.38 )	10.98 ( 8.91 )
LIP AND/OR ORAL CAVITY CANCER STAGE 0	NEOPLASMS BENIGN, MALIGNANT AND UNSPECIFIED (INCL CYSTS AND POLYPS)	1	604.03 ( 37.77 - 9658.63 )	603.92 ( 300.96 )
BENIGN PROSTATIC HYPERPLASIA	REPRODUCTIVE SYSTEM AND BREAST DISORDERS	1	3.64 ( 0.51 - 25.99 )	3.64 ( 1.9 )
ELECTROCARDIOGRAM QT PROLONGED	INVESTIGATIONS	1	8.05 ( 1.12 - 57.93 )	8.05 ( 6.1 )
LIVER ABSCESS	INFECTIONS AND INFESTATIONS	1	3.92 ( 0.55 - 28.03 )	3.92 ( 2.16 )
MUCOSAL NECROSIS	GENERAL DISORDERS AND ADMINISTRATION SITE CONDITIONS	1	60.4 ( 7.73 - 471.95 )	60.39 ( 53.1 )
VIRAL UVEITIS	INFECTIONS AND INFESTATIONS	1	151.01 ( 16.87 - 1351.32 )	150.98 ( 119.19 )
SOFT TISSUE INFECTION	INFECTIONS AND INFESTATIONS	1	5.64 ( 0.79 - 40.45 )	5.64 ( 3.79 )
CEREBRAL HAEMATOMA	NERVOUS SYSTEM DISORDERS	1	11.62 ( 1.61 - 84.04 )	11.61 ( 9.52 )
HEMIANOPIA HOMONYMOUS	NERVOUS SYSTEM DISORDERS	1	17.77 ( 2.43 - 129.81 )	17.76 ( 15.37 )
OCULAR HYPERAEMIA	EYE DISORDERS	1	0.47 ( 0.07 - 3.37 )	0.47 ( 0.58 )
THERAPEUTIC RESPONSE DECREASED	GENERAL DISORDERS AND ADMINISTRATION SITE CONDITIONS	1	0.11 ( 0.02 - 0.76 )	0.11 ( 7.4 )
LATENT TUBERCULOSIS	INFECTIONS AND INFESTATIONS	1	1.63 ( 0.23 - 11.59 )	1.63 ( 0.24 )
HEPATOMEGALY	HEPATOBILIARY DISORDERS	1	1.69 ( 0.24 - 12.01 )	1.69 ( 0.28 )
ADENOCARCINOMA	NEOPLASMS BENIGN, MALIGNANT AND UNSPECIFIED (INCL CYSTS AND POLYPS)	1	3.78 ( 0.53 - 26.97 )	3.77 ( 2.03 )
UTERINE DISORDER	REPRODUCTIVE SYSTEM AND BREAST DISORDERS	1	2.42 ( 0.34 - 17.22 )	2.42 ( 0.83 )
VAGINAL DISCHARGE	REPRODUCTIVE SYSTEM AND BREAST DISORDERS	1	3.3 ( 0.46 - 23.56 )	3.3 ( 1.59 )
LUNG DIFFUSION TEST DECREASED	INVESTIGATIONS	1	67.11 ( 8.5 - 529.85 )	67.1 ( 58.61 )
CRYPTOCOCCOSIS	INFECTIONS AND INFESTATIONS	1	6.86 ( 0.96 - 49.28 )	6.86 ( 4.95 )
MENINGITIS MENINGOCOCCAL	INFECTIONS AND INFESTATIONS	1	60.4 ( 7.73 - 471.95 )	60.39 ( 53.1 )
PHARYNGEAL ULCERATION	RESPIRATORY, THORACIC AND MEDIASTINAL DISORDERS	1	7.55 ( 1.05 - 54.27 )	7.55 ( 5.61 )
HEPATITIS B	INFECTIONS AND INFESTATIONS	1	1.57 ( 0.22 - 11.2 )	1.57 ( 0.21 )
HEPATITIS ACUTE	HEPATOBILIARY DISORDERS	1	6.1 ( 0.85 - 43.75 )	6.1 ( 4.22 )
CAMPYLOBACTER SEPSIS	INFECTIONS AND INFESTATIONS	1	302.01 ( 27.38 - 3331.31 )	301.96 ( 199.98 )
MASTOIDITIS	INFECTIONS AND INFESTATIONS	1	12.85 ( 1.77 - 93.17 )	12.85 ( 10.7 )
OTITIS EXTERNA	INFECTIONS AND INFESTATIONS	1	9.02 ( 1.25 - 64.95 )	9.01 ( 7.02 )
OVARIAN CANCER METASTATIC	NEOPLASMS BENIGN, MALIGNANT AND UNSPECIFIED (INCL CYSTS AND POLYPS)	1	8.88 ( 1.23 - 63.98 )	8.88 ( 6.89 )
SUBILEUS	GASTROINTESTINAL DISORDERS	1	15.49 ( 2.13 - 112.75 )	15.49 ( 13.21 )
MENISCUS INJURY	INJURY, POISONING AND PROCEDURAL COMPLICATIONS	1	0.46 ( 0.06 - 3.26 )	0.46 ( 0.64 )
DRY MOUTH	GASTROINTESTINAL DISORDERS	1	0.15 ( 0.02 - 1.08 )	0.15 ( 4.73 )
MYOPATHY	MUSCULOSKELETAL AND CONNECTIVE TISSUE DISORDERS	1	3.23 ( 0.45 - 23.05 )	3.23 ( 1.53 )
SPINAL CORD INJURY	INJURY, POISONING AND PROCEDURAL COMPLICATIONS	1	6.86 ( 0.96 - 49.28 )	6.86 ( 4.95 )
SPINAL CORD INFECTION	INFECTIONS AND INFESTATIONS	1	7.19 ( 1 - 51.66 )	7.19 ( 5.27 )
VENOUS OCCLUSION	VASCULAR DISORDERS	1	3.13 ( 0.44 - 22.33 )	3.13 ( 1.44 )
UPPER GASTROINTESTINAL HAEMORRHAGE	GASTROINTESTINAL DISORDERS	1	2.15 ( 0.3 - 15.32 )	2.15 ( 0.61 )
ILL-DEFINED DISORDER	GENERAL DISORDERS AND ADMINISTRATION SITE CONDITIONS	1	0.12 ( 0.02 - 0.82 )	0.12 ( 6.8 )
ABDOMINAL SYMPTOM	GASTROINTESTINAL DISORDERS	1	20.83 ( 2.84 - 152.93 )	20.82 ( 18.24 )
HEPATITIS C	INFECTIONS AND INFESTATIONS	1	1.65 ( 0.23 - 11.72 )	1.65 ( 0.25 )
ANGIOPATHY	VASCULAR DISORDERS	1	2.38 ( 0.33 - 16.95 )	2.38 ( 0.8 )
GINGIVAL PAIN	GASTROINTESTINAL DISORDERS	1	1.39 ( 0.2 - 9.88 )	1.39 ( 0.11 )
HAEMATURIA	RENAL AND URINARY DISORDERS	1	0.93 ( 0.13 - 6.65 )	0.93 ( 0 )
SKIN ATROPHY	SKIN AND SUBCUTANEOUS TISSUE DISORDERS	1	1.42 ( 0.2 - 10.09 )	1.42 ( 0.12 )
TOOTHACHE	GASTROINTESTINAL DISORDERS	1	0.37 ( 0.05 - 2.66 )	0.37 ( 1.05 )
VASODILATATION	VASCULAR DISORDERS	1	6.23 ( 0.87 - 44.66 )	6.23 ( 4.34 )
DIABETIC METABOLIC DECOMPENSATION	METABOLISM AND NUTRITION DISORDERS	1	28.76 ( 3.87 - 213.88 )	28.76 ( 25.58 )
GLYCOSYLATED HAEMOGLOBIN INCREASED	INVESTIGATIONS	1	2.02 ( 0.28 - 14.39 )	2.02 ( 0.51 )
HYPERGLYCAEMIA	METABOLISM AND NUTRITION DISORDERS	1	1.59 ( 0.22 - 11.28 )	1.59 ( 0.22 )
PNEUMONIA MORAXELLA	INFECTIONS AND INFESTATIONS	1	302.01 ( 27.38 - 3331.31 )	301.96 ( 199.98 )
MENTAL DISORDER	PSYCHIATRIC DISORDERS	1	0.8 ( 0.11 - 5.69 )	0.8 ( 0.05 )
HORMONE RECEPTOR POSITIVE BREAST CANCER	NEOPLASMS BENIGN, MALIGNANT AND UNSPECIFIED (INCL CYSTS AND POLYPS)	1	75.5 ( 9.44 - 603.8 )	75.49 ( 65.34 )
ANAEMIA FOLATE DEFICIENCY	BLOOD AND LYMPHATIC SYSTEM DISORDERS	1	50.34 ( 6.54 - 387.19 )	50.33 ( 44.63 )
BLOOD THYROID STIMULATING HORMONE INCREASED	INVESTIGATIONS	1	5.12 ( 0.71 - 36.65 )	5.12 ( 3.29 )
BUNDLE BRANCH BLOCK RIGHT	CARDIAC DISORDERS	1	6.43 ( 0.9 - 46.1 )	6.42 ( 4.53 )
MUSCLE HAEMORRHAGE	MUSCULOSKELETAL AND CONNECTIVE TISSUE DISORDERS	1	19.48 ( 2.66 - 142.76 )	19.48 ( 16.98 )
CREPITATIONS	GENERAL DISORDERS AND ADMINISTRATION SITE CONDITIONS	1	1.67 ( 0.23 - 11.88 )	1.67 ( 0.27 )
PARAINFLUENZAE VIRUS INFECTION	INFECTIONS AND INFESTATIONS	1	40.27 ( 5.32 - 304.91 )	40.26 ( 35.89 )
PARANEOPLASTIC SYNDROME	NEOPLASMS BENIGN, MALIGNANT AND UNSPECIFIED (INCL CYSTS AND POLYPS)	1	27.46 ( 3.7 - 203.73 )	27.45 ( 24.38 )
MENTAL IMPAIRMENT	NERVOUS SYSTEM DISORDERS	1	1.54 ( 0.22 - 11 )	1.54 ( 0.19 )
GENITAL BLISTER	REPRODUCTIVE SYSTEM AND BREAST DISORDERS	1	86.29 ( 10.61 - 701.49 )	86.27 ( 73.75 )
ABSCESS ORAL	INFECTIONS AND INFESTATIONS	1	4.03 ( 0.56 - 28.78 )	4.03 ( 2.26 )
SARS-COV-2 TEST NEGATIVE	INVESTIGATIONS	1	4.87 ( 0.68 - 34.86 )	4.87 ( 3.05 )
LYMPHOPLASMACYTOID LYMPHOMA/IMMUNOCYTOMA	NEOPLASMS BENIGN, MALIGNANT AND UNSPECIFIED (INCL CYSTS AND POLYPS)	1	35.53 ( 4.73 - 267.04 )	35.52 ( 31.69 )
DERMATITIS PSORIASIFORM	SKIN AND SUBCUTANEOUS TISSUE DISORDERS	1	2.68 ( 0.38 - 19.14 )	2.68 ( 1.05 )
MALIGNANT PERITONEAL NEOPLASM	NEOPLASMS BENIGN, MALIGNANT AND UNSPECIFIED (INCL CYSTS AND POLYPS)	1	15.1 ( 2.08 - 109.87 )	15.1 ( 12.84 )
LEMIERRE SYNDROME	INFECTIONS AND INFESTATIONS	1	86.29 ( 10.61 - 701.49 )	86.27 ( 73.75 )
SMALL INTESTINAL PERFORATION	GASTROINTESTINAL DISORDERS	1	8.16 ( 1.13 - 58.73 )	8.16 ( 6.2 )
MEAN CELL VOLUME INCREASED	INVESTIGATIONS	1	4.83 ( 0.68 - 34.58 )	4.83 ( 3.01 )
RED CELL DISTRIBUTION WIDTH INCREASED	INVESTIGATIONS	1	2.85 ( 0.4 - 20.32 )	2.85 ( 1.19 )
UTERINE CANCER	NEOPLASMS BENIGN, MALIGNANT AND UNSPECIFIED (INCL CYSTS AND POLYPS)	1	1.7 ( 0.24 - 12.08 )	1.7 ( 0.29 )
SPINAL DISORDER	MUSCULOSKELETAL AND CONNECTIVE TISSUE DISORDERS	1	0.49 ( 0.07 - 3.47 )	0.49 ( 0.53 )
EXPIRED PRODUCT ADMINISTERED	INJURY, POISONING AND PROCEDURAL COMPLICATIONS	1	2.09 ( 0.29 - 14.89 )	2.09 ( 0.57 )
PURULENCE	INFECTIONS AND INFESTATIONS	1	3.07 ( 0.43 - 21.88 )	3.07 ( 1.38 )
RESPIRATION ABNORMAL	RESPIRATORY, THORACIC AND MEDIASTINAL DISORDERS	1	5.59 ( 0.78 - 40.07 )	5.59 ( 3.74 )
BLOOD IRON DECREASED	INVESTIGATIONS	1	0.71 ( 0.1 - 5.07 )	0.71 ( 0.11 )
THALASSAEMIA BETA	CONGENITAL, FAMILIAL AND GENETIC DISORDERS	1	604.03 ( 37.77 - 9658.63 )	603.92 ( 300.96 )
PULMONARY THROMBOSIS	RESPIRATORY, THORACIC AND MEDIASTINAL DISORDERS	1	0.58 ( 0.08 - 4.11 )	0.58 ( 0.31 )
DERMATITIS ALLERGIC	SKIN AND SUBCUTANEOUS TISSUE DISORDERS	1	0.62 ( 0.09 - 4.4 )	0.62 ( 0.23 )
CYTOMEGALOVIRUS CHORIORETINITIS	INFECTIONS AND INFESTATIONS	1	14.05 ( 1.93 - 102.03 )	14.04 ( 11.84 )
HYPERSOMNIA	NERVOUS SYSTEM DISORDERS	1	0.81 ( 0.11 - 5.75 )	0.81 ( 0.05 )
PRESYNCOPE	NERVOUS SYSTEM DISORDERS	1	1.27 ( 0.18 - 9.05 )	1.27 ( 0.06 )
GASTRIC CANCER	NEOPLASMS BENIGN, MALIGNANT AND UNSPECIFIED (INCL CYSTS AND POLYPS)	1	1.29 ( 0.18 - 9.2 )	1.29 ( 0.07 )
CERVICAL VERTEBRAL FRACTURE	INJURY, POISONING AND PROCEDURAL COMPLICATIONS	1	2.26 ( 0.32 - 16.12 )	2.26 ( 0.7 )
COORDINATION ABNORMAL	NERVOUS SYSTEM DISORDERS	1	2.46 ( 0.34 - 17.5 )	2.45 ( 0.86 )
BLOOD SODIUM DECREASED	INVESTIGATIONS	1	0.93 ( 0.13 - 6.62 )	0.93 ( 0.01 )
EAR CONGESTION	EAR AND LABYRINTH DISORDERS	1	2.19 ( 0.31 - 15.59 )	2.19 ( 0.64 )
BLOOD TEST	INVESTIGATIONS	1	67.11 ( 8.5 - 529.85 )	67.1 ( 58.61 )
DISEASE COMPLICATION	GENERAL DISORDERS AND ADMINISTRATION SITE CONDITIONS	1	6.49 ( 0.91 - 46.6 )	6.49 ( 4.6 )
DEPRESSED MOOD	PSYCHIATRIC DISORDERS	1	0.27 ( 0.04 - 1.95 )	0.27 ( 1.92 )
HYPOPHAGIA	METABOLISM AND NUTRITION DISORDERS	1	0.58 ( 0.08 - 4.11 )	0.58 ( 0.31 )
PLICATED TONGUE	GASTROINTESTINAL DISORDERS	1	33.56 ( 4.48 - 251.42 )	33.55 ( 29.92 )
PSYCHOLOGICAL TRAUMA	PSYCHIATRIC DISORDERS	1	120.81 ( 14.11 - 1034.24 )	120.78 ( 98.99 )
REGURGITATION	GASTROINTESTINAL DISORDERS	1	10.41 ( 1.44 - 75.2 )	10.41 ( 8.36 )
SALIVARY GLAND DISORDER	GASTROINTESTINAL DISORDERS	1	14.38 ( 1.98 - 104.51 )	14.38 ( 12.16 )
TASTE DISORDER	NERVOUS SYSTEM DISORDERS	1	1.47 ( 0.21 - 10.46 )	1.47 ( 0.15 )
TEMPERATURE INTOLERANCE	GENERAL DISORDERS AND ADMINISTRATION SITE CONDITIONS	1	2.32 ( 0.33 - 16.56 )	2.32 ( 0.75 )
TONSILLAR HYPERTROPHY	RESPIRATORY, THORACIC AND MEDIASTINAL DISORDERS	1	6.49 ( 0.91 - 46.6 )	6.49 ( 4.6 )
UPPER AIRWAY OBSTRUCTION	RESPIRATORY, THORACIC AND MEDIASTINAL DISORDERS	1	60.4 ( 7.73 - 471.95 )	60.39 ( 53.1 )
FEBRILE CONVULSION	NERVOUS SYSTEM DISORDERS	1	201.34 ( 20.94 - 1936 )	201.31 ( 149.48 )
PERIODONTITIS	INFECTIONS AND INFESTATIONS	1	4.72 ( 0.66 - 33.76 )	4.72 ( 2.91 )
BLOOD ANTIDIURETIC HORMONE DECREASED	INVESTIGATIONS	1	604.03 ( 37.77 - 9658.63 )	603.92 ( 300.96 )
BLOOD SODIUM INCREASED	INVESTIGATIONS	1	14.05 ( 1.93 - 102.03 )	14.04 ( 11.84 )
DIABETES INSIPIDUS	ENDOCRINE DISORDERS	1	27.46 ( 3.7 - 203.73 )	27.45 ( 24.38 )
POLYDIPSIA	METABOLISM AND NUTRITION DISORDERS	1	15.1 ( 2.08 - 109.87 )	15.1 ( 12.84 )
RENAL TUBULAR DISORDER	RENAL AND URINARY DISORDERS	1	37.75 ( 5.01 - 284.73 )	37.75 ( 33.67 )
THROMBOTIC MICROANGIOPATHY	BLOOD AND LYMPHATIC SYSTEM DISORDERS	1	10.79 ( 1.49 - 77.93 )	10.78 ( 8.72 )
GENITAL CYST	REPRODUCTIVE SYSTEM AND BREAST DISORDERS	1	75.5 ( 9.44 - 603.8 )	75.49 ( 65.34 )
PERIODONTAL DISEASE	GASTROINTESTINAL DISORDERS	1	5.92 ( 0.83 - 42.45 )	5.92 ( 4.05 )
TOOTH DISLOCATION	INJURY, POISONING AND PROCEDURAL COMPLICATIONS	1	100.67 ( 12.12 - 836.37 )	100.65 ( 84.57 )
TOOTH LOSS	GASTROINTESTINAL DISORDERS	1	1.23 ( 0.17 - 8.73 )	1.23 ( 0.04 )
APNOEA	RESPIRATORY, THORACIC AND MEDIASTINAL DISORDERS	1	4.14 ( 0.58 - 29.57 )	4.14 ( 2.36 )
CEREBELLAR ISCHAEMIA	NERVOUS SYSTEM DISORDERS	1	604.03 ( 37.77 - 9658.63 )	603.92 ( 300.96 )
DIZZINESS POSTURAL	NERVOUS SYSTEM DISORDERS	1	2.92 ( 0.41 - 20.82 )	2.92 ( 1.25 )
NEUROLOGICAL DECOMPENSATION	NERVOUS SYSTEM DISORDERS	1	24.16 ( 3.27 - 178.35 )	24.16 ( 21.34 )
PULMONARY ARTERY THROMBOSIS	RESPIRATORY, THORACIC AND MEDIASTINAL DISORDERS	1	35.53 ( 4.73 - 267.04 )	35.52 ( 31.69 )
CRYING	GENERAL DISORDERS AND ADMINISTRATION SITE CONDITIONS	1	0.72 ( 0.1 - 5.13 )	0.72 ( 0.11 )
DEVELOPMENTAL HIP DYSPLASIA	CONGENITAL, FAMILIAL AND GENETIC DISORDERS	1	30.2 ( 4.05 - 225.08 )	30.2 ( 26.89 )
GESTATIONAL DIABETES	PREGNANCY, PUERPERIUM AND PERINATAL CONDITIONS	1	3.66 ( 0.51 - 26.15 )	3.66 ( 1.92 )
PERINATAL DEPRESSION	PSYCHIATRIC DISORDERS	1	60.4 ( 7.73 - 471.95 )	60.39 ( 53.1 )
INTERVERTEBRAL DISC OPERATION	SURGICAL AND MEDICAL PROCEDURES	1	3.08 ( 0.43 - 21.99 )	3.08 ( 1.4 )
JOINT FLUID DRAINAGE	SURGICAL AND MEDICAL PROCEDURES	1	4.65 ( 0.65 - 33.24 )	4.65 ( 2.84 )
PHOTOSENSITIVITY REACTION	SKIN AND SUBCUTANEOUS TISSUE DISORDERS	1	0.68 ( 0.1 - 4.83 )	0.68 ( 0.15 )
PURPURA	SKIN AND SUBCUTANEOUS TISSUE DISORDERS	1	2.1 ( 0.29 - 14.94 )	2.1 ( 0.57 )
COCCIDIOIDOMYCOSIS	INFECTIONS AND INFESTATIONS	1	3.39 ( 0.48 - 24.23 )	3.39 ( 1.68 )
NIGHTMARE	PSYCHIATRIC DISORDERS	1	2.1 ( 0.3 - 14.99 )	2.1 ( 0.58 )
LUNG SQUAMOUS CELL CARCINOMA STAGE III	NEOPLASMS BENIGN, MALIGNANT AND UNSPECIFIED (INCL CYSTS AND POLYPS)	1	67.11 ( 8.5 - 529.85 )	67.1 ( 58.61 )
DISSEMINATED VARICELLA ZOSTER VIRUS INFECTION	INFECTIONS AND INFESTATIONS	1	31.79 ( 4.25 - 237.52 )	31.79 ( 28.33 )
ABSCESS JAW	INFECTIONS AND INFESTATIONS	1	6.86 ( 0.96 - 49.28 )	6.86 ( 4.95 )
BLOOD LACTATE DEHYDROGENASE INCREASED	INVESTIGATIONS	1	1.39 ( 0.2 - 9.88 )	1.39 ( 0.11 )
DUODENAL ULCER PERFORATION	GASTROINTESTINAL DISORDERS	1	0.17 ( 0.02 - 1.21 )	0.17 ( 4.06 )
FULL BLOOD COUNT DECREASED	INVESTIGATIONS	1	2.16 ( 0.3 - 15.43 )	2.16 ( 0.62 )
NEUTROPENIC SEPSIS	INFECTIONS AND INFESTATIONS	1	2.99 ( 0.42 - 21.33 )	2.99 ( 1.32 )
ARTERIAL THROMBOSIS	VASCULAR DISORDERS	1	11.84 ( 1.64 - 85.72 )	11.84 ( 9.74 )
OXYGEN SATURATION DECREASED	INVESTIGATIONS	1	0.16 ( 0.02 - 1.13 )	0.16 ( 4.44 )
THYROID DISORDER	ENDOCRINE DISORDERS	1	0.58 ( 0.08 - 4.11 )	0.58 ( 0.31 )
NON-SMALL CELL LUNG CANCER METASTATIC	NEOPLASMS BENIGN, MALIGNANT AND UNSPECIFIED (INCL CYSTS AND POLYPS)	1	11.62 ( 1.61 - 84.04 )	11.61 ( 9.52 )
HEPATITIS TOXIC	HEPATOBILIARY DISORDERS	1	9.15 ( 1.27 - 65.95 )	9.15 ( 7.15 )
PREGNANCY ON CONTRACEPTIVE	PREGNANCY, PUERPERIUM AND PERINATAL CONDITIONS	1	17.26 ( 2.36 - 126 )	17.25 ( 14.89 )
BENIGN LUNG NEOPLASM	NEOPLASMS BENIGN, MALIGNANT AND UNSPECIFIED (INCL CYSTS AND POLYPS)	1	9.15 ( 1.27 - 65.95 )	9.15 ( 7.15 )
RHEUMATOID NODULE	MUSCULOSKELETAL AND CONNECTIVE TISSUE DISORDERS	1	0.26 ( 0.04 - 1.88 )	0.26 ( 2.05 )
SARCOIDOSIS	IMMUNE SYSTEM DISORDERS	1	1.06 ( 0.15 - 7.56 )	1.06 ( 0 )
MOTOR NEURONE DISEASE	NERVOUS SYSTEM DISORDERS	1	17.77 ( 2.43 - 129.81 )	17.76 ( 15.37 )
CYTOMEGALOVIRUS INFECTION REACTIVATION	INFECTIONS AND INFESTATIONS	1	40.27 ( 5.32 - 304.91 )	40.26 ( 35.89 )
AORTIC STENOSIS	VASCULAR DISORDERS	1	3.39 ( 0.48 - 24.23 )	3.39 ( 1.68 )
TRICUSPID VALVE INCOMPETENCE	CARDIAC DISORDERS	1	2.82 ( 0.4 - 20.13 )	2.82 ( 1.17 )
ROCKY MOUNTAIN SPOTTED FEVER	INFECTIONS AND INFESTATIONS	1	26.26 ( 3.55 - 194.5 )	26.26 ( 23.28 )
SMALL INTESTINE CARCINOMA METASTATIC	NEOPLASMS BENIGN, MALIGNANT AND UNSPECIFIED (INCL CYSTS AND POLYPS)	1	86.29 ( 10.61 - 701.49 )	86.27 ( 73.75 )
NERVOUS SYSTEM DISORDER	NERVOUS SYSTEM DISORDERS	1	0.73 ( 0.1 - 5.17 )	0.73 ( 0.1 )
BLOOD ALKALINE PHOSPHATASE ABNORMAL	INVESTIGATIONS	1	54.91 ( 7.09 - 425.41 )	54.9 ( 48.51 )
OROMANDIBULAR DYSTONIA	NERVOUS SYSTEM DISORDERS	1	604.03 ( 37.77 - 9658.63 )	603.92 ( 300.96 )
GALLBLADDER ADENOCARCINOMA	NEOPLASMS BENIGN, MALIGNANT AND UNSPECIFIED (INCL CYSTS AND POLYPS)	1	35.53 ( 4.73 - 267.04 )	35.52 ( 31.69 )
ABDOMINAL WALL ABSCESS	INFECTIONS AND INFESTATIONS	1	16.32 ( 2.24 - 119.01 )	16.32 ( 14.01 )
ANASTOMOTIC LEAK	INJURY, POISONING AND PROCEDURAL COMPLICATIONS	1	60.4 ( 7.73 - 471.95 )	60.39 ( 53.1 )
FISTULA	MUSCULOSKELETAL AND CONNECTIVE TISSUE DISORDERS	1	1.95 ( 0.27 - 13.88 )	1.95 ( 0.46 )
ANEURYSM RUPTURED	VASCULAR DISORDERS	1	11.62 ( 1.61 - 84.04 )	11.61 ( 9.52 )
CAROTID ARTERIOSCLEROSIS	NERVOUS SYSTEM DISORDERS	1	18.3 ( 2.5 - 133.85 )	18.3 ( 15.87 )
BRAIN NATRIURETIC PEPTIDE INCREASED	INVESTIGATIONS	1	14.73 ( 2.03 - 107.12 )	14.73 ( 12.49 )
TROPONIN I INCREASED	INVESTIGATIONS	1	31.79 ( 4.25 - 237.52 )	31.79 ( 28.33 )
HEPATIC ATROPHY	HEPATOBILIARY DISORDERS	1	46.46 ( 6.08 - 355.25 )	46.46 ( 41.3 )
HYPERCOAGULATION	BLOOD AND LYMPHATIC SYSTEM DISORDERS	1	10.41 ( 1.44 - 75.2 )	10.41 ( 8.36 )
CONJUNCTIVITIS	INFECTIONS AND INFESTATIONS	1	0.68 ( 0.1 - 4.83 )	0.68 ( 0.15 )
HEPATITIS A ANTIBODY POSITIVE	INVESTIGATIONS	1	100.67 ( 12.12 - 836.37 )	100.65 ( 84.57 )
PERSECUTORY DELUSION	PSYCHIATRIC DISORDERS	1	67.11 ( 8.5 - 529.85 )	67.1 ( 58.61 )
ARTERIAL INSUFFICIENCY	VASCULAR DISORDERS	1	86.29 ( 10.61 - 701.49 )	86.27 ( 73.75 )
ISCHAEMIC SKIN ULCER	SKIN AND SUBCUTANEOUS TISSUE DISORDERS	1	151.01 ( 16.87 - 1351.32 )	150.98 ( 119.19 )
INTERVERTEBRAL DISC DISORDER	MUSCULOSKELETAL AND CONNECTIVE TISSUE DISORDERS	1	1.13 ( 0.16 - 8.02 )	1.13 ( 0.01 )
MESOTHELIOMA MALIGNANT	NEOPLASMS BENIGN, MALIGNANT AND UNSPECIFIED (INCL CYSTS AND POLYPS)	1	43.14 ( 5.67 - 328.17 )	43.14 ( 38.42 )
MENINGITIS VIRAL	INFECTIONS AND INFESTATIONS	1	5.81 ( 0.81 - 41.63 )	5.81 ( 3.94 )
PENILE PAIN	REPRODUCTIVE SYSTEM AND BREAST DISORDERS	1	201.34 ( 20.94 - 1936 )	201.31 ( 149.48 )
PENILE VEIN THROMBOSIS	REPRODUCTIVE SYSTEM AND BREAST DISORDERS	1	Inf ( NaN - Inf )	Inf ( 603.92 )
ADENOIDAL DISORDER	RESPIRATORY, THORACIC AND MEDIASTINAL DISORDERS	1	67.11 ( 8.5 - 529.85 )	67.1 ( 58.61 )
DIVERTICULUM	GASTROINTESTINAL DISORDERS	1	0.98 ( 0.14 - 6.94 )	0.98 ( 0 )
OESOPHAGEAL ULCER	GASTROINTESTINAL DISORDERS	1	4.65 ( 0.65 - 33.24 )	4.65 ( 2.84 )
NOCTURIA	RENAL AND URINARY DISORDERS	1	3.07 ( 0.43 - 21.88 )	3.07 ( 1.38 )
PERIPHERAL MOTOR NEUROPATHY	NERVOUS SYSTEM DISORDERS	1	35.53 ( 4.73 - 267.04 )	35.52 ( 31.69 )
BACILLUS INFECTION	INFECTIONS AND INFESTATIONS	1	40.27 ( 5.32 - 304.91 )	40.26 ( 35.89 )
THERMAL BURN	INJURY, POISONING AND PROCEDURAL COMPLICATIONS	1	1.25 ( 0.18 - 8.9 )	1.25 ( 0.05 )
NEUTROPHILIC DERMATOSIS	SKIN AND SUBCUTANEOUS TISSUE DISORDERS	1	35.53 ( 4.73 - 267.04 )	35.52 ( 31.69 )
BLOOD CHOLESTEROL DECREASED	INVESTIGATIONS	1	14.73 ( 2.03 - 107.12 )	14.73 ( 12.49 )
LOW DENSITY LIPOPROTEIN DECREASED	INVESTIGATIONS	1	50.34 ( 6.54 - 387.19 )	50.33 ( 44.63 )
HEPATITIS C ANTIBODY POSITIVE	INVESTIGATIONS	1	86.29 ( 10.61 - 701.49 )	86.27 ( 73.75 )
MECHANICAL ILEUS	GASTROINTESTINAL DISORDERS	1	15.49 ( 2.13 - 112.75 )	15.49 ( 13.21 )
SUICIDE ATTEMPT	PSYCHIATRIC DISORDERS	1	2.35 ( 0.33 - 16.75 )	2.35 ( 0.77 )
BACK DISORDER	MUSCULOSKELETAL AND CONNECTIVE TISSUE DISORDERS	1	0.38 ( 0.05 - 2.73 )	0.38 ( 0.99 )
CHEMICAL BURN	INJURY, POISONING AND PROCEDURAL COMPLICATIONS	1	75.5 ( 9.44 - 603.8 )	75.49 ( 65.34 )
ESSENTIAL HYPERTENSION	VASCULAR DISORDERS	1	6.71 ( 0.93 - 48.17 )	6.71 ( 4.81 )
MOUTH SWELLING	GASTROINTESTINAL DISORDERS	1	2.31 ( 0.32 - 16.43 )	2.31 ( 0.74 )
COMPLICATED APPENDICITIS	INFECTIONS AND INFESTATIONS	1	46.46 ( 6.08 - 355.25 )	46.46 ( 41.3 )
PROCEDURAL COMPLICATION	INJURY, POISONING AND PROCEDURAL COMPLICATIONS	1	1.01 ( 0.14 - 7.17 )	1.01 ( 0 )
NECROTISING FASCIITIS	INFECTIONS AND INFESTATIONS	1	2.5 ( 0.35 - 17.79 )	2.5 ( 0.89 )
RHINITIS	INFECTIONS AND INFESTATIONS	1	0.87 ( 0.12 - 6.21 )	0.87 ( 0.02 )
POOR QUALITY PRODUCT ADMINISTERED	INJURY, POISONING AND PROCEDURAL COMPLICATIONS	1	4.99 ( 0.7 - 35.73 )	4.99 ( 3.17 )
SUSPECTED PRODUCT TAMPERING	PRODUCT ISSUES	1	201.34 ( 20.94 - 1936 )	201.31 ( 149.48 )
APATHY	PSYCHIATRIC DISORDERS	1	3.53 ( 0.49 - 25.22 )	3.53 ( 1.8 )
BURNING SENSATION	NERVOUS SYSTEM DISORDERS	1	0.18 ( 0.03 - 1.28 )	0.18 ( 3.72 )
EMOTIONAL POVERTY	PSYCHIATRIC DISORDERS	1	151.01 ( 16.87 - 1351.32 )	150.98 ( 119.19 )
ILLUSION	PSYCHIATRIC DISORDERS	1	25.17 ( 3.4 - 186.08 )	25.16 ( 22.28 )
JOINT STIFFNESS	MUSCULOSKELETAL AND CONNECTIVE TISSUE DISORDERS	1	0.09 ( 0.01 - 0.61 )	0.09 ( 9.74 )
LYMPH NODE PAIN	BLOOD AND LYMPHATIC SYSTEM DISORDERS	1	4.95 ( 0.69 - 35.44 )	4.95 ( 3.13 )
BLOOD CALCIUM INCREASED	INVESTIGATIONS	1	2.58 ( 0.36 - 18.4 )	2.58 ( 0.96 )
CARDIAC FLUTTER	CARDIAC DISORDERS	1	3.02 ( 0.42 - 21.55 )	3.02 ( 1.34 )
LISTLESS	PSYCHIATRIC DISORDERS	1	4.35 ( 0.61 - 31.07 )	4.34 ( 2.56 )
JAUNDICE	HEPATOBILIARY DISORDERS	1	1.35 ( 0.19 - 9.61 )	1.35 ( 0.09 )
TOE OPERATION	SURGICAL AND MEDICAL PROCEDURES	1	2.73 ( 0.38 - 19.49 )	2.73 ( 1.09 )
CEREBRAL FUNGAL INFECTION	INFECTIONS AND INFESTATIONS	1	201.34 ( 20.94 - 1936 )	201.31 ( 149.48 )
PNEUMONIA FUNGAL	INFECTIONS AND INFESTATIONS	1	4.87 ( 0.68 - 34.86 )	4.87 ( 3.05 )
ARTHRODESIS	SURGICAL AND MEDICAL PROCEDURES	1	1.09 ( 0.15 - 7.78 )	1.09 ( 0.01 )
EPIGASTRIC DISCOMFORT	GASTROINTESTINAL DISORDERS	1	1.97 ( 0.28 - 14.01 )	1.97 ( 0.47 )
POSTOPERATIVE WOUND INFECTION	INFECTIONS AND INFESTATIONS	1	0.51 ( 0.07 - 3.62 )	0.51 ( 0.47 )
PUSTULAR PSORIASIS	SKIN AND SUBCUTANEOUS TISSUE DISORDERS	1	1.19 ( 0.17 - 8.47 )	1.19 ( 0.03 )
BLADDER CANCER RECURRENT	NEOPLASMS BENIGN, MALIGNANT AND UNSPECIFIED (INCL CYSTS AND POLYPS)	1	14.73 ( 2.03 - 107.12 )	14.73 ( 12.49 )
NOCARDIOSIS	INFECTIONS AND INFESTATIONS	1	5.92 ( 0.83 - 42.45 )	5.92 ( 4.05 )
PAIN IN JAW	MUSCULOSKELETAL AND CONNECTIVE TISSUE DISORDERS	1	0.4 ( 0.06 - 2.88 )	0.4 ( 0.88 )
CANDIDA PNEUMONIA	INFECTIONS AND INFESTATIONS	1	28.76 ( 3.87 - 213.88 )	28.76 ( 25.58 )
BLOOD TEST ABNORMAL	INVESTIGATIONS	1	0.58 ( 0.08 - 4.13 )	0.58 ( 0.3 )
DEPRESSED LEVEL OF CONSCIOUSNESS	NERVOUS SYSTEM DISORDERS	1	1.78 ( 0.25 - 12.65 )	1.78 ( 0.34 )
CHRONIC GASTRITIS	GASTROINTESTINAL DISORDERS	1	4.58 ( 0.64 - 32.73 )	4.58 ( 2.77 )
ALLERGIC REACTION TO EXCIPIENT	IMMUNE SYSTEM DISORDERS	1	100.67 ( 12.12 - 836.37 )	100.65 ( 84.57 )
ANAPHYLACTIC SHOCK	IMMUNE SYSTEM DISORDERS	1	1.08 ( 0.15 - 7.71 )	1.08 ( 0.01 )
KERATOACANTHOMA	NEOPLASMS BENIGN, MALIGNANT AND UNSPECIFIED (INCL CYSTS AND POLYPS)	1	16.78 ( 2.3 - 122.4 )	16.78 ( 14.43 )
NAEVOID MELANOMA	NEOPLASMS BENIGN, MALIGNANT AND UNSPECIFIED (INCL CYSTS AND POLYPS)	1	201.34 ( 20.94 - 1936 )	201.31 ( 149.48 )
ERUCTATION	GASTROINTESTINAL DISORDERS	1	1.88 ( 0.26 - 13.4 )	1.88 ( 0.41 )
RADICULOPATHY	NERVOUS SYSTEM DISORDERS	1	2.77 ( 0.39 - 19.76 )	2.77 ( 1.13 )
PARANASAL SINUS HAEMORRHAGE	RESPIRATORY, THORACIC AND MEDIASTINAL DISORDERS	1	75.5 ( 9.44 - 603.8 )	75.49 ( 65.34 )
COMMUNICATION DISORDER	PSYCHIATRIC DISORDERS	1	12.58 ( 1.74 - 91.19 )	12.58 ( 10.44 )
KIDNEY ENLARGEMENT	RENAL AND URINARY DISORDERS	1	14.05 ( 1.93 - 102.03 )	14.04 ( 11.84 )
RECTAL ULCER	GASTROINTESTINAL DISORDERS	1	10.79 ( 1.49 - 77.93 )	10.78 ( 8.72 )
PERONEAL NERVE INJURY	INJURY, POISONING AND PROCEDURAL COMPLICATIONS	1	75.5 ( 9.44 - 603.8 )	75.49 ( 65.34 )
PLEOCYTOSIS	NERVOUS SYSTEM DISORDERS	1	40.27 ( 5.32 - 304.91 )	40.26 ( 35.89 )
HEPATIC CANCER	NEOPLASMS BENIGN, MALIGNANT AND UNSPECIFIED (INCL CYSTS AND POLYPS)	1	2.04 ( 0.29 - 14.54 )	2.04 ( 0.53 )
ANTIPHOSPHOLIPID SYNDROME	BLOOD AND LYMPHATIC SYSTEM DISORDERS	1	6.43 ( 0.9 - 46.1 )	6.42 ( 4.53 )
SPINAL CORD INFARCTION	NERVOUS SYSTEM DISORDERS	1	54.91 ( 7.09 - 425.41 )	54.9 ( 48.51 )
MYELOPROLIFERATIVE NEOPLASM	NEOPLASMS BENIGN, MALIGNANT AND UNSPECIFIED (INCL CYSTS AND POLYPS)	1	46.46 ( 6.08 - 355.25 )	46.46 ( 41.3 )
NAIL PSORIASIS	SKIN AND SUBCUTANEOUS TISSUE DISORDERS	1	20.83 ( 2.84 - 152.93 )	20.82 ( 18.24 )
AORTITIS	VASCULAR DISORDERS	1	20.13 ( 2.75 - 147.67 )	20.13 ( 17.59 )
INTRACRANIAL ANEURYSM	NERVOUS SYSTEM DISORDERS	1	1.71 ( 0.24 - 12.15 )	1.71 ( 0.29 )
SALIVARY GLAND PAIN	GASTROINTESTINAL DISORDERS	1	54.91 ( 7.09 - 425.41 )	54.9 ( 48.51 )
ORAL FUNGAL INFECTION	INFECTIONS AND INFESTATIONS	1	2.32 ( 0.33 - 16.56 )	2.32 ( 0.75 )
BLOOD BLISTER	SKIN AND SUBCUTANEOUS TISSUE DISORDERS	1	2.6 ( 0.37 - 18.56 )	2.6 ( 0.98 )
ABDOMINAL ABSCESS	INFECTIONS AND INFESTATIONS	1	2.55 ( 0.36 - 18.17 )	2.55 ( 0.94 )
TRANSITIONAL CELL CARCINOMA URETHRA	NEOPLASMS BENIGN, MALIGNANT AND UNSPECIFIED (INCL CYSTS AND POLYPS)	1	604.03 ( 37.77 - 9658.63 )	603.92 ( 300.96 )
HIGH DENSITY LIPOPROTEIN DECREASED	INVESTIGATIONS	1	15.49 ( 2.13 - 112.75 )	15.49 ( 13.21 )
CHOKING	RESPIRATORY, THORACIC AND MEDIASTINAL DISORDERS	1	1.36 ( 0.19 - 9.7 )	1.36 ( 0.1 )
SALIVARY HYPERSECRETION	GASTROINTESTINAL DISORDERS	1	6.79 ( 0.95 - 48.72 )	6.79 ( 4.88 )
DERMATITIS	SKIN AND SUBCUTANEOUS TISSUE DISORDERS	1	0.82 ( 0.12 - 5.83 )	0.82 ( 0.04 )
SKIN IRRITATION	SKIN AND SUBCUTANEOUS TISSUE DISORDERS	1	1.22 ( 0.17 - 8.68 )	1.22 ( 0.04 )
SCROTAL ABSCESS	INFECTIONS AND INFESTATIONS	1	43.14 ( 5.67 - 328.17 )	43.14 ( 38.42 )
RENAL ATROPHY	RENAL AND URINARY DISORDERS	1	11.4 ( 1.58 - 82.43 )	11.39 ( 9.31 )
ENDOMETRIAL CANCER STAGE III	NEOPLASMS BENIGN, MALIGNANT AND UNSPECIFIED (INCL CYSTS AND POLYPS)	1	100.67 ( 12.12 - 836.37 )	100.65 ( 84.57 )
METASTATIC SQUAMOUS CELL CARCINOMA	NEOPLASMS BENIGN, MALIGNANT AND UNSPECIFIED (INCL CYSTS AND POLYPS)	1	13.42 ( 1.85 - 97.4 )	13.42 ( 11.25 )
PANIC ATTACK	PSYCHIATRIC DISORDERS	1	0.83 ( 0.12 - 5.91 )	0.83 ( 0.03 )
RETINAL TOXICITY	EYE DISORDERS	1	4.31 ( 0.6 - 30.85 )	4.31 ( 2.53 )
PRODUCT USE ISSUE	INJURY, POISONING AND PROCEDURAL COMPLICATIONS	1	0.07 ( 0.01 - 0.46 )	0.07 ( 13.39 )
CARDIAC DYSFUNCTION	CARDIAC DISORDERS	1	8.51 ( 1.18 - 61.24 )	8.51 ( 6.53 )
AORTIC THROMBOSIS	VASCULAR DISORDERS	1	20.13 ( 2.75 - 147.67 )	20.13 ( 17.59 )
MICROSLEEP	NERVOUS SYSTEM DISORDERS	1	Inf ( NaN - Inf )	Inf ( 603.92 )
CYSTITIS HAEMORRHAGIC	RENAL AND URINARY DISORDERS	1	16.78 ( 2.3 - 122.4 )	16.78 ( 14.43 )
LYMPHOEDEMA	VASCULAR DISORDERS	1	1.58 ( 0.22 - 11.26 )	1.58 ( 0.21 )
TUBO-OVARIAN ABSCESS	INFECTIONS AND INFESTATIONS	1	30.2 ( 4.05 - 225.08 )	30.2 ( 26.89 )
METASTATIC RENAL CELL CARCINOMA	NEOPLASMS BENIGN, MALIGNANT AND UNSPECIFIED (INCL CYSTS AND POLYPS)	1	23.23 ( 3.15 - 171.23 )	23.23 ( 20.48 )
APPENDICEAL ABSCESS	INFECTIONS AND INFESTATIONS	1	50.34 ( 6.54 - 387.19 )	50.33 ( 44.63 )
BREAST NEOPLASM	NEOPLASMS BENIGN, MALIGNANT AND UNSPECIFIED (INCL CYSTS AND POLYPS)	1	4.17 ( 0.58 - 29.78 )	4.16 ( 2.39 )
MYELITIS	INFECTIONS AND INFESTATIONS	1	5.39 ( 0.75 - 38.63 )	5.39 ( 3.55 )
HERPES ZOSTER INFECTION NEUROLOGICAL	INFECTIONS AND INFESTATIONS	1	33.56 ( 4.48 - 251.42 )	33.55 ( 29.92 )
CANDIDA INFECTION	INFECTIONS AND INFESTATIONS	1	0.64 ( 0.09 - 4.58 )	0.64 ( 0.2 )
FLATULENCE	GASTROINTESTINAL DISORDERS	1	0.52 ( 0.07 - 3.73 )	0.52 ( 0.43 )
PNEUMONIA CYTOMEGALOVIRAL	INFECTIONS AND INFESTATIONS	1	9.15 ( 1.27 - 65.95 )	9.15 ( 7.15 )
BREAST CANCER STAGE II	NEOPLASMS BENIGN, MALIGNANT AND UNSPECIFIED (INCL CYSTS AND POLYPS)	1	1.91 ( 0.27 - 13.57 )	1.91 ( 0.43 )
ANOGENITAL WARTS	NEOPLASMS BENIGN, MALIGNANT AND UNSPECIFIED (INCL CYSTS AND POLYPS)	1	15.49 ( 2.13 - 112.75 )	15.49 ( 13.21 )
THERAPEUTIC RESPONSE SHORTENED	GENERAL DISORDERS AND ADMINISTRATION SITE CONDITIONS	1	0.34 ( 0.05 - 2.38 )	0.34 ( 1.31 )
FLIGHT OF IDEAS	PSYCHIATRIC DISORDERS	1	201.34 ( 20.94 - 1936 )	201.31 ( 149.48 )
HYPOXIA	RESPIRATORY, THORACIC AND MEDIASTINAL DISORDERS	1	1.01 ( 0.14 - 7.16 )	1.01 ( 0 )
VASCULITIS NECROTISING	VASCULAR DISORDERS	1	9.74 ( 1.35 - 70.27 )	9.74 ( 7.72 )
CHEMOTHERAPY	SURGICAL AND MEDICAL PROCEDURES	1	3.11 ( 0.44 - 22.22 )	3.11 ( 1.43 )
BRAIN STEM INFARCTION	NERVOUS SYSTEM DISORDERS	1	10.41 ( 1.44 - 75.2 )	10.41 ( 8.36 )
VIRAL DIARRHOEA	INFECTIONS AND INFESTATIONS	1	35.53 ( 4.73 - 267.04 )	35.52 ( 31.69 )
METASTATIC MALIGNANT MELANOMA	NEOPLASMS BENIGN, MALIGNANT AND UNSPECIFIED (INCL CYSTS AND POLYPS)	1	7.95 ( 1.1 - 57.16 )	7.95 ( 5.99 )
SUPERIOR VENA CAVA SYNDROME	VASCULAR DISORDERS	1	37.75 ( 5.01 - 284.73 )	37.75 ( 33.67 )
POST-ACUTE COVID-19 SYNDROME	INFECTIONS AND INFESTATIONS	1	6.57 ( 0.91 - 47.12 )	6.56 ( 4.67 )
CARCINOMA IN SITU	NEOPLASMS BENIGN, MALIGNANT AND UNSPECIFIED (INCL CYSTS AND POLYPS)	1	31.79 ( 4.25 - 237.52 )	31.79 ( 28.33 )
EXTRASYSTOLES	CARDIAC DISORDERS	1	3.85 ( 0.54 - 27.49 )	3.85 ( 2.09 )
ARTHROSCOPY	INVESTIGATIONS	1	4.61 ( 0.64 - 32.98 )	4.61 ( 2.81 )
RETINAL VEIN THROMBOSIS	EYE DISORDERS	1	15.9 ( 2.18 - 115.8 )	15.89 ( 13.6 )
ABORTION SPONTANEOUS	PREGNANCY, PUERPERIUM AND PERINATAL CONDITIONS	1	0.46 ( 0.06 - 3.25 )	0.46 ( 0.65 )
PNEUMONIA RESPIRATORY SYNCYTIAL VIRAL	INFECTIONS AND INFESTATIONS	1	50.34 ( 6.54 - 387.19 )	50.33 ( 44.63 )
T-CELL LYMPHOMA	NEOPLASMS BENIGN, MALIGNANT AND UNSPECIFIED (INCL CYSTS AND POLYPS)	1	6.16 ( 0.86 - 44.2 )	6.16 ( 4.28 )
INGROWING NAIL	SKIN AND SUBCUTANEOUS TISSUE DISORDERS	1	1.92 ( 0.27 - 13.7 )	1.92 ( 0.44 )
MONOCLONAL B-CELL LYMPHOCYTOSIS	BLOOD AND LYMPHATIC SYSTEM DISORDERS	1	67.11 ( 8.5 - 529.85 )	67.1 ( 58.61 )
LYMPHOCYTIC LEUKAEMIA	NEOPLASMS BENIGN, MALIGNANT AND UNSPECIFIED (INCL CYSTS AND POLYPS)	1	16.78 ( 2.3 - 122.4 )	16.78 ( 14.43 )
NO ADVERSE EVENT	GENERAL DISORDERS AND ADMINISTRATION SITE CONDITIONS	1	0.22 ( 0.03 - 1.57 )	0.22 ( 2.75 )
FOURNIER'S GANGRENE	INFECTIONS AND INFESTATIONS	1	21.57 ( 2.93 - 158.58 )	21.57 ( 18.94 )
AGITATED DEPRESSION	PSYCHIATRIC DISORDERS	1	120.81 ( 14.11 - 1034.24 )	120.78 ( 98.99 )
COMPLETED SUICIDE	PSYCHIATRIC DISORDERS	1	4.68 ( 0.65 - 33.5 )	4.68 ( 2.87 )
SMALL CELL LUNG CANCER METASTATIC	NEOPLASMS BENIGN, MALIGNANT AND UNSPECIFIED (INCL CYSTS AND POLYPS)	1	9.59 ( 1.33 - 69.14 )	9.59 ( 7.57 )
SARCOMA UTERUS	NEOPLASMS BENIGN, MALIGNANT AND UNSPECIFIED (INCL CYSTS AND POLYPS)	1	151.01 ( 16.87 - 1351.32 )	150.98 ( 119.19 )
CEREBELLAR ARTERY OCCLUSION	NERVOUS SYSTEM DISORDERS	1	Inf ( NaN - Inf )	Inf ( 603.92 )
GASTRIC ULCER HELICOBACTER	INFECTIONS AND INFESTATIONS	1	120.81 ( 14.11 - 1034.24 )	120.78 ( 98.99 )
AXILLARY VEIN THROMBOSIS	VASCULAR DISORDERS	1	302.01 ( 27.38 - 3331.31 )	301.96 ( 199.98 )
PLEURAL DISORDER	RESPIRATORY, THORACIC AND MEDIASTINAL DISORDERS	1	15.1 ( 2.08 - 109.87 )	15.1 ( 12.84 )
SUBCLAVIAN VEIN THROMBOSIS	VASCULAR DISORDERS	1	40.27 ( 5.32 - 304.91 )	40.26 ( 35.89 )
EAR PAIN	EAR AND LABYRINTH DISORDERS	1	0.25 ( 0.04 - 1.77 )	0.25 ( 2.27 )
EMOTIONAL DISORDER	PSYCHIATRIC DISORDERS	1	0.9 ( 0.13 - 6.38 )	0.9 ( 0.01 )
HEPATITIS B CORE ANTIBODY POSITIVE	INVESTIGATIONS	1	14.05 ( 1.93 - 102.03 )	14.04 ( 11.84 )
SARCOMA	NEOPLASMS BENIGN, MALIGNANT AND UNSPECIFIED (INCL CYSTS AND POLYPS)	1	9.44 ( 1.31 - 68.04 )	9.44 ( 7.43 )
CUBITAL TUNNEL SYNDROME	NERVOUS SYSTEM DISORDERS	1	10.07 ( 1.39 - 72.65 )	10.07 ( 8.03 )
DENTAL DISCOMFORT	GASTROINTESTINAL DISORDERS	1	16.78 ( 2.3 - 122.4 )	16.78 ( 14.43 )
GINGIVAL DISCOMFORT	GASTROINTESTINAL DISORDERS	1	31.79 ( 4.25 - 237.52 )	31.79 ( 28.33 )
VIRAL HEPATITIS CARRIER	INFECTIONS AND INFESTATIONS	1	151.01 ( 16.87 - 1351.32 )	150.98 ( 119.19 )
HEPATITIS B DNA INCREASED	INVESTIGATIONS	1	18.3 ( 2.5 - 133.85 )	18.3 ( 15.87 )
VARICES OESOPHAGEAL	GASTROINTESTINAL DISORDERS	1	6.29 ( 0.88 - 45.13 )	6.29 ( 4.4 )
UMBILICAL HERNIA	GASTROINTESTINAL DISORDERS	1	1.37 ( 0.19 - 9.72 )	1.37 ( 0.1 )
LARGE INTESTINE POLYP	GASTROINTESTINAL DISORDERS	1	1.46 ( 0.21 - 10.41 )	1.46 ( 0.15 )
OESOPHAGITIS	GASTROINTESTINAL DISORDERS	1	1.81 ( 0.25 - 12.88 )	1.81 ( 0.36 )
UVEITIS	EYE DISORDERS	1	0.7 ( 0.1 - 5.01 )	0.7 ( 0.12 )
ELBOW DEFORMITY	MUSCULOSKELETAL AND CONNECTIVE TISSUE DISORDERS	1	2.7 ( 0.38 - 19.23 )	2.7 ( 1.06 )
ACANTHOSIS	SKIN AND SUBCUTANEOUS TISSUE DISORDERS	1	50.34 ( 6.54 - 387.19 )	50.33 ( 44.63 )
PRURIGO	SKIN AND SUBCUTANEOUS TISSUE DISORDERS	1	11.84 ( 1.64 - 85.72 )	11.84 ( 9.74 )
THERAPEUTIC PRODUCT EFFECT DELAYED	GENERAL DISORDERS AND ADMINISTRATION SITE CONDITIONS	1	2.23 ( 0.31 - 15.88 )	2.23 ( 0.67 )
APRAXIA	NERVOUS SYSTEM DISORDERS	1	28.76 ( 3.87 - 213.88 )	28.76 ( 25.58 )
BLOOD GLUCOSE FLUCTUATION	INVESTIGATIONS	1	4.72 ( 0.66 - 33.76 )	4.72 ( 2.91 )
GLYCOSYLATED HAEMOGLOBIN ABNORMAL	INVESTIGATIONS	1	46.46 ( 6.08 - 355.25 )	46.46 ( 41.3 )
ATYPICAL MYCOBACTERIAL LYMPHADENITIS	INFECTIONS AND INFESTATIONS	1	302.01 ( 27.38 - 3331.31 )	301.96 ( 199.98 )
HIP ARTHROPLASTY	SURGICAL AND MEDICAL PROCEDURES	1	0.15 ( 0.02 - 1.07 )	0.15 ( 4.76 )
BLOOD CULTURE POSITIVE	INVESTIGATIONS	1	10.98 ( 1.52 - 79.38 )	10.98 ( 8.91 )
GASTROINTESTINAL PERFORATION	GASTROINTESTINAL DISORDERS	1	2.78 ( 0.39 - 19.85 )	2.78 ( 1.14 )
HERPES ZOSTER MENINGOMYELITIS	INFECTIONS AND INFESTATIONS	1	120.81 ( 14.11 - 1034.24 )	120.78 ( 98.99 )
ALANINE AMINOTRANSFERASE ABNORMAL	INVESTIGATIONS	1	1.95 ( 0.27 - 13.88 )	1.95 ( 0.46 )
PULSE ABSENT	INVESTIGATIONS	1	9.59 ( 1.33 - 69.14 )	9.59 ( 7.57 )
SKIN ULCER	SKIN AND SUBCUTANEOUS TISSUE DISORDERS	1	0.17 ( 0.02 - 1.18 )	0.17 ( 4.2 )
ABNORMAL LOSS OF WEIGHT	METABOLISM AND NUTRITION DISORDERS	1	2.22 ( 0.31 - 15.82 )	2.22 ( 0.67 )
CEREBRAL ARTERIOSCLEROSIS	NERVOUS SYSTEM DISORDERS	1	60.4 ( 7.73 - 471.95 )	60.39 ( 53.1 )
WRIST FRACTURE	INJURY, POISONING AND PROCEDURAL COMPLICATIONS	1	0.52 ( 0.07 - 3.72 )	0.52 ( 0.43 )
DISSEMINATED CRYPTOCOCCOSIS	INFECTIONS AND INFESTATIONS	1	31.79 ( 4.25 - 237.52 )	31.79 ( 28.33 )
VAGINAL ULCERATION	REPRODUCTIVE SYSTEM AND BREAST DISORDERS	1	20.83 ( 2.84 - 152.93 )	20.82 ( 18.24 )
LUPUS NEPHRITIS	RENAL AND URINARY DISORDERS	1	7.95 ( 1.1 - 57.16 )	7.95 ( 5.99 )
SYSTEMIC LUPUS ERYTHEMATOSUS	MUSCULOSKELETAL AND CONNECTIVE TISSUE DISORDERS	1	0.06 ( 0.01 - 0.4 )	0.06 ( 15.95 )
ENDOMETRIOSIS	REPRODUCTIVE SYSTEM AND BREAST DISORDERS	1	2.43 ( 0.34 - 17.29 )	2.43 ( 0.83 )
OVARIAN CANCER STAGE I	NEOPLASMS BENIGN, MALIGNANT AND UNSPECIFIED (INCL CYSTS AND POLYPS)	1	120.81 ( 14.11 - 1034.24 )	120.78 ( 98.99 )
RENAL CELL CARCINOMA STAGE I	NEOPLASMS BENIGN, MALIGNANT AND UNSPECIFIED (INCL CYSTS AND POLYPS)	1	86.29 ( 10.61 - 701.49 )	86.27 ( 73.75 )
RENAL INFARCT	RENAL AND URINARY DISORDERS	1	20.13 ( 2.75 - 147.67 )	20.13 ( 17.59 )
GENITAL NEOPLASM MALIGNANT FEMALE	NEOPLASMS BENIGN, MALIGNANT AND UNSPECIFIED (INCL CYSTS AND POLYPS)	1	43.14 ( 5.67 - 328.17 )	43.14 ( 38.42 )
MACROCYTOSIS	BLOOD AND LYMPHATIC SYSTEM DISORDERS	1	6.16 ( 0.86 - 44.2 )	6.16 ( 4.28 )
CUTANEOUS T-CELL LYMPHOMA STAGE IV	NEOPLASMS BENIGN, MALIGNANT AND UNSPECIFIED (INCL CYSTS AND POLYPS)	1	302.01 ( 27.38 - 3331.31 )	301.96 ( 199.98 )
SPONDYLOLISTHESIS	MUSCULOSKELETAL AND CONNECTIVE TISSUE DISORDERS	1	2.59 ( 0.36 - 18.48 )	2.59 ( 0.97 )
VERTEBRAL OSTEOPHYTE	MUSCULOSKELETAL AND CONNECTIVE TISSUE DISORDERS	1	9.44 ( 1.31 - 68.04 )	9.44 ( 7.43 )
NEUROPATHIC MUSCULAR ATROPHY	MUSCULOSKELETAL AND CONNECTIVE TISSUE DISORDERS	1	86.29 ( 10.61 - 701.49 )	86.27 ( 73.75 )
SCOLIOSIS	MUSCULOSKELETAL AND CONNECTIVE TISSUE DISORDERS	1	1.17 ( 0.17 - 8.36 )	1.17 ( 0.03 )
CAUDA EQUINA SYNDROME	NERVOUS SYSTEM DISORDERS	1	12.33 ( 1.7 - 89.29 )	12.32 ( 10.2 )
ENTEROCOCCAL INFECTION	INFECTIONS AND INFESTATIONS	1	5.12 ( 0.71 - 36.65 )	5.12 ( 3.29 )
MALIGNANT MELANOMA IN SITU	NEOPLASMS BENIGN, MALIGNANT AND UNSPECIFIED (INCL CYSTS AND POLYPS)	1	6.43 ( 0.9 - 46.1 )	6.42 ( 4.53 )
COLON CANCER STAGE IV	NEOPLASMS BENIGN, MALIGNANT AND UNSPECIFIED (INCL CYSTS AND POLYPS)	1	27.46 ( 3.7 - 203.73 )	27.45 ( 24.38 )
METASTASES TO MOUTH	NEOPLASMS BENIGN, MALIGNANT AND UNSPECIFIED (INCL CYSTS AND POLYPS)	1	201.34 ( 20.94 - 1936 )	201.31 ( 149.48 )
THERAPEUTIC PRODUCT INEFFECTIVE	GENERAL DISORDERS AND ADMINISTRATION SITE CONDITIONS	1	5.81 ( 0.81 - 41.63 )	5.81 ( 3.94 )
RIGHT VENTRICULAR DYSFUNCTION	CARDIAC DISORDERS	1	50.34 ( 6.54 - 387.19 )	50.33 ( 44.63 )
OVARIAN CYST	REPRODUCTIVE SYSTEM AND BREAST DISORDERS	1	0.76 ( 0.11 - 5.41 )	0.76 ( 0.07 )
GENITAL HERPES	INFECTIONS AND INFESTATIONS	1	4.31 ( 0.6 - 30.85 )	4.31 ( 2.53 )
VEIN DISORDER	VASCULAR DISORDERS	1	1.6 ( 0.22 - 11.37 )	1.6 ( 0.22 )
EPIDIDYMITIS	INFECTIONS AND INFESTATIONS	1	10.6 ( 1.47 - 76.54 )	10.6 ( 8.54 )
BLADDER TRANSITIONAL CELL CARCINOMA RECURRENT	NEOPLASMS BENIGN, MALIGNANT AND UNSPECIFIED (INCL CYSTS AND POLYPS)	1	27.46 ( 3.7 - 203.73 )	27.45 ( 24.38 )
RETINAL HAEMORRHAGE	EYE DISORDERS	1	4.58 ( 0.64 - 32.73 )	4.58 ( 2.77 )
NEOVASCULAR AGE-RELATED MACULAR DEGENERATION	EYE DISORDERS	1	18.3 ( 2.5 - 133.85 )	18.3 ( 15.87 )
COMPLEX REGIONAL PAIN SYNDROME	NERVOUS SYSTEM DISORDERS	1	7.28 ( 1.01 - 52.28 )	7.28 ( 5.35 )
RETINAL VASCULAR THROMBOSIS	EYE DISORDERS	1	20.83 ( 2.84 - 152.93 )	20.82 ( 18.24 )
FIBROMYALGIA	MUSCULOSKELETAL AND CONNECTIVE TISSUE DISORDERS	1	0.11 ( 0.02 - 0.77 )	0.11 ( 7.28 )
GASTROINTESTINAL PAIN	GASTROINTESTINAL DISORDERS	1	0.99 ( 0.14 - 7.05 )	0.99 ( 0 )
DYSPNOEA AT REST	RESPIRATORY, THORACIC AND MEDIASTINAL DISORDERS	1	14.38 ( 1.98 - 104.51 )	14.38 ( 12.16 )
MOTOR DYSFUNCTION	NERVOUS SYSTEM DISORDERS	1	1.55 ( 0.22 - 11.02 )	1.55 ( 0.19 )
SKIN LESION INFLAMMATION	SKIN AND SUBCUTANEOUS TISSUE DISORDERS	1	120.81 ( 14.11 - 1034.24 )	120.78 ( 98.99 )
BLOOD GLUCOSE DECREASED	INVESTIGATIONS	1	0.85 ( 0.12 - 6.02 )	0.85 ( 0.03 )
GENITAL HERPES SIMPLEX	INFECTIONS AND INFESTATIONS	1	33.56 ( 4.48 - 251.42 )	33.55 ( 29.92 )
GASTROINTESTINAL TRACT IRRITATION	GASTROINTESTINAL DISORDERS	1	12.08 ( 1.67 - 87.47 )	12.08 ( 9.96 )
SUPRAVENTRICULAR TACHYCARDIA	CARDIAC DISORDERS	1	2.31 ( 0.32 - 16.49 )	2.31 ( 0.74 )
ELECTROCARDIOGRAM QRS COMPLEX SHORTENED	INVESTIGATIONS	1	302.01 ( 27.38 - 3331.31 )	301.96 ( 199.98 )
HAEMANGIOMA OF SKIN	NEOPLASMS BENIGN, MALIGNANT AND UNSPECIFIED (INCL CYSTS AND POLYPS)	1	86.29 ( 10.61 - 701.49 )	86.27 ( 73.75 )
INTERFERON GAMMA RELEASE ASSAY POSITIVE	INVESTIGATIONS	1	16.78 ( 2.3 - 122.4 )	16.78 ( 14.43 )
EYE IRRITATION	EYE DISORDERS	1	0.7 ( 0.1 - 4.98 )	0.7 ( 0.13 )
COLONIC ABSCESS	INFECTIONS AND INFESTATIONS	1	6.86 ( 0.96 - 49.28 )	6.86 ( 4.95 )
RHINOVIRUS INFECTION	INFECTIONS AND INFESTATIONS	1	12.85 ( 1.77 - 93.17 )	12.85 ( 10.7 )
LEUKAEMIA GRANULOCYTIC	NEOPLASMS BENIGN, MALIGNANT AND UNSPECIFIED (INCL CYSTS AND POLYPS)	1	86.29 ( 10.61 - 701.49 )	86.27 ( 73.75 )
BLOOD CREATINE PHOSPHOKINASE MB INCREASED	INVESTIGATIONS	1	40.27 ( 5.32 - 304.91 )	40.26 ( 35.89 )
FULL BLOOD COUNT ABNORMAL	INVESTIGATIONS	1	3.21 ( 0.45 - 22.93 )	3.21 ( 1.52 )
PERIHEPATIC DISCOMFORT	HEPATOBILIARY DISORDERS	1	201.34 ( 20.94 - 1936 )	201.31 ( 149.48 )
LUNG ADENOCARCINOMA STAGE IV	NEOPLASMS BENIGN, MALIGNANT AND UNSPECIFIED (INCL CYSTS AND POLYPS)	1	27.46 ( 3.7 - 203.73 )	27.45 ( 24.38 )
HYPERPYREXIA	GENERAL DISORDERS AND ADMINISTRATION SITE CONDITIONS	1	18.88 ( 2.58 - 138.16 )	18.87 ( 16.41 )
NON-SMALL CELL LUNG CANCER RECURRENT	NEOPLASMS BENIGN, MALIGNANT AND UNSPECIFIED (INCL CYSTS AND POLYPS)	1	151.01 ( 16.87 - 1351.32 )	150.98 ( 119.19 )
INAPPROPRIATE ANTIDIURETIC HORMONE SECRETION	ENDOCRINE DISORDERS	1	8.88 ( 1.23 - 63.98 )	8.88 ( 6.89 )
APPENDIX CANCER METASTATIC	NEOPLASMS BENIGN, MALIGNANT AND UNSPECIFIED (INCL CYSTS AND POLYPS)	1	Inf ( NaN - Inf )	Inf ( 603.92 )
GRANULOCYTE COUNT DECREASED	INVESTIGATIONS	1	37.75 ( 5.01 - 284.73 )	37.75 ( 33.67 )
LARGE INTESTINAL STENOSIS	GASTROINTESTINAL DISORDERS	1	14.05 ( 1.93 - 102.03 )	14.04 ( 11.84 )
EYE DISORDER	EYE DISORDERS	1	0.28 ( 0.04 - 1.95 )	0.28 ( 1.91 )
STATUS EPILEPTICUS	NERVOUS SYSTEM DISORDERS	1	17.77 ( 2.43 - 129.81 )	17.76 ( 15.37 )
CARCINOID TUMOUR IN THE LARGE INTESTINE	NEOPLASMS BENIGN, MALIGNANT AND UNSPECIFIED (INCL CYSTS AND POLYPS)	1	Inf ( NaN - Inf )	Inf ( 603.92 )
PULMONARY VENOUS THROMBOSIS	RESPIRATORY, THORACIC AND MEDIASTINAL DISORDERS	1	604.03 ( 37.77 - 9658.63 )	603.92 ( 300.96 )
MYELODYSPLASTIC SYNDROME WITH EXCESS BLASTS	NEOPLASMS BENIGN, MALIGNANT AND UNSPECIFIED (INCL CYSTS AND POLYPS)	1	201.34 ( 20.94 - 1936 )	201.31 ( 149.48 )
CHOLANGITIS SCLEROSING	HEPATOBILIARY DISORDERS	1	12.85 ( 1.77 - 93.17 )	12.85 ( 10.7 )
SKIN EXFOLIATION	SKIN AND SUBCUTANEOUS TISSUE DISORDERS	1	0.33 ( 0.05 - 2.35 )	0.33 ( 1.36 )
TREATMENT NONCOMPLIANCE	GENERAL DISORDERS AND ADMINISTRATION SITE CONDITIONS	1	0.68 ( 0.1 - 4.86 )	0.68 ( 0.15 )
FACE OEDEMA	GENERAL DISORDERS AND ADMINISTRATION SITE CONDITIONS	1	1.88 ( 0.26 - 13.4 )	1.88 ( 0.41 )
SENSITIVITY TO WEATHER CHANGE	GENERAL DISORDERS AND ADMINISTRATION SITE CONDITIONS	1	0.36 ( 0.05 - 2.56 )	0.36 ( 1.14 )
DIABETIC HYPEROSMOLAR COMA	NERVOUS SYSTEM DISORDERS	1	302.01 ( 27.38 - 3331.31 )	301.96 ( 199.98 )
PROSTATIC SPECIFIC ANTIGEN INCREASED	INVESTIGATIONS	1	4.22 ( 0.59 - 30.2 )	4.22 ( 2.44 )
CARDIAC INFECTION	INFECTIONS AND INFESTATIONS	1	7.84 ( 1.09 - 56.41 )	7.84 ( 5.89 )
ONCOCYTOMA	NEOPLASMS BENIGN, MALIGNANT AND UNSPECIFIED (INCL CYSTS AND POLYPS)	1	151.01 ( 16.87 - 1351.32 )	150.98 ( 119.19 )
SPLENOMEGALY	BLOOD AND LYMPHATIC SYSTEM DISORDERS	1	1.78 ( 0.25 - 12.65 )	1.78 ( 0.34 )
OSTEOCHONDROSIS	MUSCULOSKELETAL AND CONNECTIVE TISSUE DISORDERS	1	5.16 ( 0.72 - 36.96 )	5.16 ( 3.33 )
LUNG DIFFUSION DISORDER	RESPIRATORY, THORACIC AND MEDIASTINAL DISORDERS	1	86.29 ( 10.61 - 701.49 )	86.27 ( 73.75 )
EXTRASKELETAL OSSIFICATION	INJURY, POISONING AND PROCEDURAL COMPLICATIONS	1	201.34 ( 20.94 - 1936 )	201.31 ( 149.48 )
FACET JOINT SYNDROME	MUSCULOSKELETAL AND CONNECTIVE TISSUE DISORDERS	1	0.61 ( 0.09 - 4.33 )	0.61 ( 0.25 )
EMPYEMA	INFECTIONS AND INFESTATIONS	1	2.81 ( 0.39 - 20.04 )	2.81 ( 1.16 )
ANAESTHETIC COMPLICATION	INJURY, POISONING AND PROCEDURAL COMPLICATIONS	1	10.41 ( 1.44 - 75.2 )	10.41 ( 8.36 )
MAJOR DEPRESSION	PSYCHIATRIC DISORDERS	1	6.16 ( 0.86 - 44.2 )	6.16 ( 4.28 )
DYSPNOEA PAROXYSMAL NOCTURNAL	RESPIRATORY, THORACIC AND MEDIASTINAL DISORDERS	1	60.4 ( 7.73 - 471.95 )	60.39 ( 53.1 )
ORTHOPNOEA	RESPIRATORY, THORACIC AND MEDIASTINAL DISORDERS	1	8.63 ( 1.2 - 62.13 )	8.63 ( 6.65 )
CONJUNCTIVAL HAEMORRHAGE	EYE DISORDERS	1	5.39 ( 0.75 - 38.63 )	5.39 ( 3.55 )
SPLEEN TUBERCULOSIS	INFECTIONS AND INFESTATIONS	1	60.4 ( 7.73 - 471.95 )	60.39 ( 53.1 )
VARICELLA MENINGITIS	INFECTIONS AND INFESTATIONS	1	201.34 ( 20.94 - 1936 )	201.31 ( 149.48 )
GASTRIC HAEMORRHAGE	GASTROINTESTINAL DISORDERS	1	1.55 ( 0.22 - 11.02 )	1.55 ( 0.19 )
FAILURE TO ANASTOMOSE	INJURY, POISONING AND PROCEDURAL COMPLICATIONS	1	Inf ( NaN - Inf )	Inf ( 603.92 )
TESTICULAR SEMINOMA (PURE)	NEOPLASMS BENIGN, MALIGNANT AND UNSPECIFIED (INCL CYSTS AND POLYPS)	1	46.46 ( 6.08 - 355.25 )	46.46 ( 41.3 )
FOOT OPERATION	SURGICAL AND MEDICAL PROCEDURES	1	0.41 ( 0.06 - 2.89 )	0.41 ( 0.87 )
MEDICATION ERROR	INJURY, POISONING AND PROCEDURAL COMPLICATIONS	1	0.41 ( 0.06 - 2.92 )	0.41 ( 0.84 )
THROMBOSIS MESENTERIC VESSEL	GASTROINTESTINAL DISORDERS	1	120.81 ( 14.11 - 1034.24 )	120.78 ( 98.99 )
VENA CAVA THROMBOSIS	VASCULAR DISORDERS	1	33.56 ( 4.48 - 251.42 )	33.55 ( 29.92 )
SOLITARY FIBROUS TUMOUR	NEOPLASMS BENIGN, MALIGNANT AND UNSPECIFIED (INCL CYSTS AND POLYPS)	1	Inf ( NaN - Inf )	Inf ( 603.92 )
PNEUMONIA INFLUENZAL	INFECTIONS AND INFESTATIONS	1	14.73 ( 2.03 - 107.12 )	14.73 ( 12.49 )
MALIGNANT NEOPLASM PAPILLA OF VATER	NEOPLASMS BENIGN, MALIGNANT AND UNSPECIFIED (INCL CYSTS AND POLYPS)	1	Inf ( NaN - Inf )	Inf ( 603.92 )
HEMIPARAESTHESIA	NERVOUS SYSTEM DISORDERS	1	302.01 ( 27.38 - 3331.31 )	301.96 ( 199.98 )
PLASMACYTOMA	NEOPLASMS BENIGN, MALIGNANT AND UNSPECIFIED (INCL CYSTS AND POLYPS)	1	20.83 ( 2.84 - 152.93 )	20.82 ( 18.24 )
HAEMATOLOGICAL INFECTION	INFECTIONS AND INFESTATIONS	1	11.4 ( 1.58 - 82.43 )	11.39 ( 9.31 )
SEASONAL ALLERGY	IMMUNE SYSTEM DISORDERS	1	0.66 ( 0.09 - 4.72 )	0.66 ( 0.17 )
NON-HODGKIN'S LYMPHOMA STAGE IV	NEOPLASMS BENIGN, MALIGNANT AND UNSPECIFIED (INCL CYSTS AND POLYPS)	1	23.23 ( 3.15 - 171.23 )	23.23 ( 20.48 )
ENTEROCOLITIS VIRAL	INFECTIONS AND INFESTATIONS	1	37.75 ( 5.01 - 284.73 )	37.75 ( 33.67 )
PNEUMONIA CRYPTOCOCCAL	INFECTIONS AND INFESTATIONS	1	4.11 ( 0.57 - 29.37 )	4.11 ( 2.34 )
LARYNGEAL CANCER	NEOPLASMS BENIGN, MALIGNANT AND UNSPECIFIED (INCL CYSTS AND POLYPS)	1	9.44 ( 1.31 - 68.04 )	9.44 ( 7.43 )
KLEBSIELLA BACTERAEMIA	INFECTIONS AND INFESTATIONS	1	50.34 ( 6.54 - 387.19 )	50.33 ( 44.63 )
HAEMORRHOIDAL HAEMORRHAGE	GASTROINTESTINAL DISORDERS	1	3.87 ( 0.54 - 27.67 )	3.87 ( 2.12 )
ORTHOSTATIC INTOLERANCE	NERVOUS SYSTEM DISORDERS	1	54.91 ( 7.09 - 425.41 )	54.9 ( 48.51 )
CEREBRAL MICROEMBOLISM	NERVOUS SYSTEM DISORDERS	1	Inf ( NaN - Inf )	Inf ( 603.92 )
ELBOW OPERATION	SURGICAL AND MEDICAL PROCEDURES	1	3.13 ( 0.44 - 22.33 )	3.13 ( 1.44 )
REHABILITATION THERAPY	SURGICAL AND MEDICAL PROCEDURES	1	2.32 ( 0.33 - 16.56 )	2.32 ( 0.75 )
ABDOMINAL TENDERNESS	GASTROINTESTINAL DISORDERS	1	3.41 ( 0.48 - 24.36 )	3.41 ( 1.7 )
ODYNOPHAGIA	GASTROINTESTINAL DISORDERS	1	2.78 ( 0.39 - 19.85 )	2.78 ( 1.14 )
AMYLASE INCREASED	INVESTIGATIONS	1	20.13 ( 2.75 - 147.67 )	20.13 ( 17.59 )
EROSIVE OESOPHAGITIS	GASTROINTESTINAL DISORDERS	1	13.73 ( 1.89 - 99.66 )	13.73 ( 11.54 )
AGE-RELATED MACULAR DEGENERATION	EYE DISORDERS	1	8.88 ( 1.23 - 63.98 )	8.88 ( 6.89 )
KL-6 INCREASED	INVESTIGATIONS	1	67.11 ( 8.5 - 529.85 )	67.1 ( 58.61 )
SKIN HAEMORRHAGE	SKIN AND SUBCUTANEOUS TISSUE DISORDERS	1	1.03 ( 0.14 - 7.33 )	1.03 ( 0 )
LUNG CANCER METASTATIC	NEOPLASMS BENIGN, MALIGNANT AND UNSPECIFIED (INCL CYSTS AND POLYPS)	1	1.91 ( 0.27 - 13.57 )	1.91 ( 0.43 )
SUDDEN HEARING LOSS	EAR AND LABYRINTH DISORDERS	1	5.12 ( 0.71 - 36.65 )	5.12 ( 3.29 )
ECZEMA HERPETICUM	INFECTIONS AND INFESTATIONS	1	43.14 ( 5.67 - 328.17 )	43.14 ( 38.42 )
IMPETIGO	INFECTIONS AND INFESTATIONS	1	7.74 ( 1.08 - 55.68 )	7.74 ( 5.8 )
ANAEMIA OF CHRONIC DISEASE	BLOOD AND LYMPHATIC SYSTEM DISORDERS	1	9.15 ( 1.27 - 65.95 )	9.15 ( 7.15 )
TESTIS CANCER	NEOPLASMS BENIGN, MALIGNANT AND UNSPECIFIED (INCL CYSTS AND POLYPS)	1	50.34 ( 6.54 - 387.19 )	50.33 ( 44.63 )
NEPHROANGIOSCLEROSIS	RENAL AND URINARY DISORDERS	1	604.03 ( 37.77 - 9658.63 )	603.92 ( 300.96 )
PERIORBITAL HAEMATOMA	INJURY, POISONING AND PROCEDURAL COMPLICATIONS	1	31.79 ( 4.25 - 237.52 )	31.79 ( 28.33 )
PUNCTURE SITE HAEMORRHAGE	GENERAL DISORDERS AND ADMINISTRATION SITE CONDITIONS	1	23.23 ( 3.15 - 171.23 )	23.23 ( 20.48 )
BLOOD LOSS ANAEMIA	BLOOD AND LYMPHATIC SYSTEM DISORDERS	1	15.9 ( 2.18 - 115.8 )	15.89 ( 13.6 )
OPPORTUNISTIC INFECTION	INFECTIONS AND INFESTATIONS	1	5.12 ( 0.71 - 36.65 )	5.12 ( 3.29 )
PATELLA FRACTURE	INJURY, POISONING AND PROCEDURAL COMPLICATIONS	1	2.63 ( 0.37 - 18.73 )	2.63 ( 1 )
LARYNGEAL NEOPLASM	NEOPLASMS BENIGN, MALIGNANT AND UNSPECIFIED (INCL CYSTS AND POLYPS)	1	37.75 ( 5.01 - 284.73 )	37.75 ( 33.67 )
PNEUMOMEDIASTINUM	RESPIRATORY, THORACIC AND MEDIASTINAL DISORDERS	1	15.9 ( 2.18 - 115.8 )	15.89 ( 13.6 )
IMMUNODEFICIENCY	IMMUNE SYSTEM DISORDERS	1	0.22 ( 0.03 - 1.57 )	0.22 ( 2.74 )
TRICHOGLOSSIA	GASTROINTESTINAL DISORDERS	1	201.34 ( 20.94 - 1936 )	201.31 ( 149.48 )
ARTERIAL STENOSIS	VASCULAR DISORDERS	1	16.32 ( 2.24 - 119.01 )	16.32 ( 14.01 )
WOUND INFECTION	INFECTIONS AND INFESTATIONS	1	0.29 ( 0.04 - 2.09 )	0.3 ( 1.68 )
INTERVERTEBRAL DISC SPACE NARROWING	MUSCULOSKELETAL AND CONNECTIVE TISSUE DISORDERS	1	4.61 ( 0.64 - 32.98 )	4.61 ( 2.81 )
MILIA	SKIN AND SUBCUTANEOUS TISSUE DISORDERS	1	67.11 ( 8.5 - 529.85 )	67.1 ( 58.61 )
BOWEN'S DISEASE	NEOPLASMS BENIGN, MALIGNANT AND UNSPECIFIED (INCL CYSTS AND POLYPS)	1	4.83 ( 0.68 - 34.58 )	4.83 ( 3.01 )
PULMONARY TOXICITY	RESPIRATORY, THORACIC AND MEDIASTINAL DISORDERS	1	0.98 ( 0.14 - 6.96 )	0.98 ( 0 )
BONE DISORDER	MUSCULOSKELETAL AND CONNECTIVE TISSUE DISORDERS	1	0.36 ( 0.05 - 2.59 )	0.36 ( 1.11 )
PAPILLARY RENAL CELL CARCINOMA	NEOPLASMS BENIGN, MALIGNANT AND UNSPECIFIED (INCL CYSTS AND POLYPS)	1	151.01 ( 16.87 - 1351.32 )	150.98 ( 119.19 )
OVERWEIGHT	METABOLISM AND NUTRITION DISORDERS	1	2.28 ( 0.32 - 16.24 )	2.28 ( 0.72 )
RHEUMATOID VASCULITIS	VASCULAR DISORDERS	1	4.22 ( 0.59 - 30.2 )	4.22 ( 2.44 )
EYE PAIN	EYE DISORDERS	1	0.39 ( 0.06 - 2.79 )	0.39 ( 0.94 )
TONGUE COATED	GASTROINTESTINAL DISORDERS	1	9.29 ( 1.29 - 66.98 )	9.29 ( 7.29 )
RED BLOOD CELL COUNT ABNORMAL	INVESTIGATIONS	1	8.05 ( 1.12 - 57.93 )	8.05 ( 6.1 )
WHITE BLOOD CELL COUNT ABNORMAL	INVESTIGATIONS	1	1.5 ( 0.21 - 10.67 )	1.5 ( 0.17 )
TRIPLE NEGATIVE BREAST CANCER	NEOPLASMS BENIGN, MALIGNANT AND UNSPECIFIED (INCL CYSTS AND POLYPS)	1	30.2 ( 4.05 - 225.08 )	30.2 ( 26.89 )
SKIN INFECTION	INFECTIONS AND INFESTATIONS	1	0.51 ( 0.07 - 3.62 )	0.51 ( 0.47 )
ACINETOBACTER INFECTION	INFECTIONS AND INFESTATIONS	1	21.57 ( 2.93 - 158.58 )	21.57 ( 18.94 )
URINE ODOUR ABNORMAL	RENAL AND URINARY DISORDERS	1	2.17 ( 0.3 - 15.48 )	2.17 ( 0.63 )
MICTURITION URGENCY	RENAL AND URINARY DISORDERS	1	1.92 ( 0.27 - 13.66 )	1.92 ( 0.44 )
GIANT CELL ARTERITIS	VASCULAR DISORDERS	1	9.44 ( 1.31 - 68.04 )	9.44 ( 7.43 )
RHABDOMYOSARCOMA	NEOPLASMS BENIGN, MALIGNANT AND UNSPECIFIED (INCL CYSTS AND POLYPS)	1	120.81 ( 14.11 - 1034.24 )	120.78 ( 98.99 )
VASCULAR MALFORMATION	CONGENITAL, FAMILIAL AND GENETIC DISORDERS	1	75.5 ( 9.44 - 603.8 )	75.49 ( 65.34 )
TONGUE BLISTERING	GASTROINTESTINAL DISORDERS	1	6.04 ( 0.84 - 43.31 )	6.04 ( 4.16 )
RESPIRATORY RATE INCREASED	INVESTIGATIONS	1	1.19 ( 0.17 - 8.49 )	1.19 ( 0.03 )
ACNE PUSTULAR	INFECTIONS AND INFESTATIONS	1	20.13 ( 2.75 - 147.67 )	20.13 ( 17.59 )
BLOOD BILIRUBIN INCREASED	INVESTIGATIONS	1	1.77 ( 0.25 - 12.61 )	1.77 ( 0.33 )
RALES	RESPIRATORY, THORACIC AND MEDIASTINAL DISORDERS	1	1.77 ( 0.25 - 12.58 )	1.77 ( 0.33 )
COLON NEOPLASM	NEOPLASMS BENIGN, MALIGNANT AND UNSPECIFIED (INCL CYSTS AND POLYPS)	1	6.71 ( 0.93 - 48.17 )	6.71 ( 4.81 )
HYPERCALCAEMIA	METABOLISM AND NUTRITION DISORDERS	1	0.74 ( 0.1 - 5.25 )	0.74 ( 0.09 )
HEPATIC INFECTION	INFECTIONS AND INFESTATIONS	1	6.1 ( 0.85 - 43.75 )	6.1 ( 4.22 )
HEPATIC CYTOLYSIS	HEPATOBILIARY DISORDERS	1	7.65 ( 1.06 - 54.96 )	7.64 ( 5.7 )
MIXED ANXIETY AND DEPRESSIVE DISORDER	PSYCHIATRIC DISORDERS	1	201.34 ( 20.94 - 1936 )	201.31 ( 149.48 )
GENITAL ABSCESS	INFECTIONS AND INFESTATIONS	1	14.38 ( 1.98 - 104.51 )	14.38 ( 12.16 )
CARDIOMEGALY	CARDIAC DISORDERS	1	1.1 ( 0.15 - 7.81 )	1.1 ( 0.01 )
INCORRECT ROUTE OF PRODUCT ADMINISTRATION	INJURY, POISONING AND PROCEDURAL COMPLICATIONS	1	0.92 ( 0.13 - 6.56 )	0.92 ( 0.01 )
DYSLIPIDAEMIA	METABOLISM AND NUTRITION DISORDERS	1	2.93 ( 0.41 - 20.92 )	2.93 ( 1.27 )
LIP AND/OR ORAL CAVITY CANCER RECURRENT	NEOPLASMS BENIGN, MALIGNANT AND UNSPECIFIED (INCL CYSTS AND POLYPS)	1	Inf ( NaN - Inf )	Inf ( 603.92 )
ARTERIOSCLEROSIS CORONARY ARTERY	CARDIAC DISORDERS	1	2.01 ( 0.28 - 14.29 )	2.01 ( 0.5 )
UTERINE PROLAPSE	REPRODUCTIVE SYSTEM AND BREAST DISORDERS	1	3.71 ( 0.52 - 26.47 )	3.71 ( 1.96 )
NEPHROGENIC ANAEMIA	BLOOD AND LYMPHATIC SYSTEM DISORDERS	1	15.1 ( 2.08 - 109.87 )	15.1 ( 12.84 )
METASTATIC BRONCHIAL CARCINOMA	NEOPLASMS BENIGN, MALIGNANT AND UNSPECIFIED (INCL CYSTS AND POLYPS)	1	8.75 ( 1.22 - 63.04 )	8.75 ( 6.77 )
LARGE INTESTINAL ULCER	GASTROINTESTINAL DISORDERS	1	5.16 ( 0.72 - 36.96 )	5.16 ( 3.33 )
HYPOGAMMAGLOBULINAEMIA	IMMUNE SYSTEM DISORDERS	1	2.89 ( 0.41 - 20.62 )	2.89 ( 1.23 )
PNEUMOPERITONEUM	GASTROINTESTINAL DISORDERS	1	17.26 ( 2.36 - 126 )	17.25 ( 14.89 )
GASTROINTESTINAL STROMAL TUMOUR	NEOPLASMS BENIGN, MALIGNANT AND UNSPECIFIED (INCL CYSTS AND POLYPS)	1	11.62 ( 1.61 - 84.04 )	11.61 ( 9.52 )
CARCINOID TUMOUR PULMONARY	NEOPLASMS BENIGN, MALIGNANT AND UNSPECIFIED (INCL CYSTS AND POLYPS)	1	26.26 ( 3.55 - 194.5 )	26.26 ( 23.28 )
LEIOMYOMA	NEOPLASMS BENIGN, MALIGNANT AND UNSPECIFIED (INCL CYSTS AND POLYPS)	1	7.37 ( 1.03 - 52.93 )	7.36 ( 5.43 )
LIGAMENT RUPTURE	INJURY, POISONING AND PROCEDURAL COMPLICATIONS	1	0.89 ( 0.13 - 6.33 )	0.89 ( 0.01 )
MARGINAL ZONE LYMPHOMA STAGE I	NEOPLASMS BENIGN, MALIGNANT AND UNSPECIFIED (INCL CYSTS AND POLYPS)	1	Inf ( NaN - Inf )	Inf ( 603.92 )
INTESTINAL ISCHAEMIA	GASTROINTESTINAL DISORDERS	1	2.96 ( 0.41 - 21.12 )	2.96 ( 1.29 )
ABSCESS INTESTINAL	INFECTIONS AND INFESTATIONS	1	4.61 ( 0.64 - 32.98 )	4.61 ( 2.81 )
HEPATIC CIRRHOSIS	HEPATOBILIARY DISORDERS	1	0.39 ( 0.06 - 2.78 )	0.39 ( 0.94 )
HEPATIC FIBROSIS	HEPATOBILIARY DISORDERS	1	2.47 ( 0.35 - 17.57 )	2.46 ( 0.87 )
COR PULMONALE ACUTE	CARDIAC DISORDERS	1	86.29 ( 10.61 - 701.49 )	86.27 ( 73.75 )
ANKYLOSING SPONDYLITIS	MUSCULOSKELETAL AND CONNECTIVE TISSUE DISORDERS	1	1.04 ( 0.15 - 7.38 )	1.04 ( 0 )
HEAD INJURY	INJURY, POISONING AND PROCEDURAL COMPLICATIONS	1	0.42 ( 0.06 - 2.98 )	0.42 ( 0.8 )
COLITIS ULCERATIVE	GASTROINTESTINAL DISORDERS	1	0.62 ( 0.09 - 4.39 )	0.62 ( 0.24 )
CSF CELL COUNT ABNORMAL	INVESTIGATIONS	1	Inf ( NaN - Inf )	Inf ( 603.92 )
HAEMORRHAGIC STROKE	NERVOUS SYSTEM DISORDERS	1	3.87 ( 0.54 - 27.67 )	3.87 ( 2.12 )
INTRAOCULAR PRESSURE INCREASED	INVESTIGATIONS	1	1.86 ( 0.26 - 13.24 )	1.86 ( 0.4 )
BONE DENSITY DECREASED	INVESTIGATIONS	1	0.98 ( 0.14 - 6.96 )	0.98 ( 0 )
CARDIAC VALVE DISEASE	CARDIAC DISORDERS	1	1.89 ( 0.26 - 13.44 )	1.89 ( 0.42 )
SUPERFICIAL VEIN THROMBOSIS	VASCULAR DISORDERS	1	28.76 ( 3.87 - 213.88 )	28.76 ( 25.58 )
MITRAL VALVE INCOMPETENCE	CARDIAC DISORDERS	1	1.44 ( 0.2 - 10.26 )	1.44 ( 0.13 )
HIGH DENSITY LIPOPROTEIN INCREASED	INVESTIGATIONS	1	14.38 ( 1.98 - 104.51 )	14.38 ( 12.16 )
ANTI-CYCLIC CITRULLINATED PEPTIDE ANTIBODY POSITIVE	INVESTIGATIONS	1	0.13 ( 0.02 - 0.91 )	0.13 ( 5.93 )
VASCULAR WALL HYPERTROPHY	VASCULAR DISORDERS	1	Inf ( NaN - Inf )	Inf ( 603.92 )
VASCULITIC RASH	SKIN AND SUBCUTANEOUS TISSUE DISORDERS	1	5.35 ( 0.75 - 38.28 )	5.34 ( 3.5 )
PARANEOPLASTIC DERMATOSIS	SKIN AND SUBCUTANEOUS TISSUE DISORDERS	1	Inf ( NaN - Inf )	Inf ( 603.92 )
MYCOBACTERIUM KANSASII INFECTION	INFECTIONS AND INFESTATIONS	1	33.56 ( 4.48 - 251.42 )	33.55 ( 29.92 )
INFECTIVE SPONDYLITIS	INFECTIONS AND INFESTATIONS	1	18.88 ( 2.58 - 138.16 )	18.87 ( 16.41 )
URINARY TRACT INFECTION BACTERIAL	INFECTIONS AND INFESTATIONS	1	2.85 ( 0.4 - 20.32 )	2.85 ( 1.19 )
CHRONIC HEPATITIS	HEPATOBILIARY DISORDERS	1	22.37 ( 3.04 - 164.67 )	22.37 ( 19.68 )
PLANTAR FASCIITIS	MUSCULOSKELETAL AND CONNECTIVE TISSUE DISORDERS	1	2.05 ( 0.29 - 14.64 )	2.05 ( 0.54 )
LOBULAR BREAST CARCINOMA IN SITU	NEOPLASMS BENIGN, MALIGNANT AND UNSPECIFIED (INCL CYSTS AND POLYPS)	1	67.11 ( 8.5 - 529.85 )	67.1 ( 58.61 )
WOUND ABSCESS	INFECTIONS AND INFESTATIONS	1	31.79 ( 4.25 - 237.52 )	31.79 ( 28.33 )
STAPHYLOCOCCAL SKIN INFECTION	INFECTIONS AND INFESTATIONS	1	4.99 ( 0.7 - 35.73 )	4.99 ( 3.17 )
STENOSIS	GENERAL DISORDERS AND ADMINISTRATION SITE CONDITIONS	1	6.57 ( 0.91 - 47.12 )	6.56 ( 4.67 )
DUODENITIS	GASTROINTESTINAL DISORDERS	1	6.1 ( 0.85 - 43.75 )	6.1 ( 4.22 )
HUMAN HERPESVIRUS 6 ENCEPHALITIS	INFECTIONS AND INFESTATIONS	1	75.5 ( 9.44 - 603.8 )	75.49 ( 65.34 )
INTENTIONAL PRODUCT MISUSE	INJURY, POISONING AND PROCEDURAL COMPLICATIONS	1	0.15 ( 0.02 - 1.05 )	0.15 ( 4.92 )
CHRONIC RESPIRATORY FAILURE	RESPIRATORY, THORACIC AND MEDIASTINAL DISORDERS	1	18.3 ( 2.5 - 133.85 )	18.3 ( 15.87 )
HEMIPLEGIA	NERVOUS SYSTEM DISORDERS	1	2.04 ( 0.29 - 14.54 )	2.04 ( 0.53 )
MUSCLE DISORDER	MUSCULOSKELETAL AND CONNECTIVE TISSUE DISORDERS	1	2.02 ( 0.28 - 14.39 )	2.02 ( 0.51 )
HYPERGAMMAGLOBULINAEMIA BENIGN MONOCLONAL	NEOPLASMS BENIGN, MALIGNANT AND UNSPECIFIED (INCL CYSTS AND POLYPS)	1	7.84 ( 1.09 - 56.41 )	7.84 ( 5.89 )
KAPOSI'S SARCOMA	NEOPLASMS BENIGN, MALIGNANT AND UNSPECIFIED (INCL CYSTS AND POLYPS)	1	5.35 ( 0.75 - 38.28 )	5.34 ( 3.5 )
RADIUS FRACTURE	INJURY, POISONING AND PROCEDURAL COMPLICATIONS	1	3.07 ( 0.43 - 21.88 )	3.07 ( 1.38 )
ONYCHOMALACIA	SKIN AND SUBCUTANEOUS TISSUE DISORDERS	1	201.34 ( 20.94 - 1936 )	201.31 ( 149.48 )
ONYCHOCLASIS	SKIN AND SUBCUTANEOUS TISSUE DISORDERS	1	1.49 ( 0.21 - 10.59 )	1.49 ( 0.16 )
VULVAL CANCER METASTATIC	NEOPLASMS BENIGN, MALIGNANT AND UNSPECIFIED (INCL CYSTS AND POLYPS)	1	60.4 ( 7.73 - 471.95 )	60.39 ( 53.1 )
DISSEMINATED VARICELLA	INFECTIONS AND INFESTATIONS	1	Inf ( NaN - Inf )	Inf ( 603.92 )
EYE MOVEMENT DISORDER	EYE DISORDERS	1	8.27 ( 1.15 - 59.54 )	8.27 ( 6.31 )
ORAL CANDIDIASIS	INFECTIONS AND INFESTATIONS	1	0.74 ( 0.1 - 5.29 )	0.74 ( 0.09 )
FEEDING DISORDER	METABOLISM AND NUTRITION DISORDERS	1	0.78 ( 0.11 - 5.58 )	0.78 ( 0.06 )
METASTATIC NEOPLASM	NEOPLASMS BENIGN, MALIGNANT AND UNSPECIFIED (INCL CYSTS AND POLYPS)	1	2.58 ( 0.36 - 18.4 )	2.58 ( 0.96 )
WHITE BLOOD CELL DISORDER	BLOOD AND LYMPHATIC SYSTEM DISORDERS	1	5.03 ( 0.7 - 36.03 )	5.03 ( 3.2 )
SENSE OF OPPRESSION	GENERAL DISORDERS AND ADMINISTRATION SITE CONDITIONS	1	28.76 ( 3.87 - 213.88 )	28.76 ( 25.58 )
CEREBRAL ATROPHY	NERVOUS SYSTEM DISORDERS	1	7.37 ( 1.03 - 52.93 )	7.36 ( 5.43 )
MUSCLE TWITCHING	MUSCULOSKELETAL AND CONNECTIVE TISSUE DISORDERS	1	1.44 ( 0.2 - 10.26 )	1.44 ( 0.13 )
MOOD ALTERED	PSYCHIATRIC DISORDERS	1	1.36 ( 0.19 - 9.68 )	1.36 ( 0.1 )
SINUSITIS FUNGAL	INFECTIONS AND INFESTATIONS	1	18.88 ( 2.58 - 138.16 )	18.87 ( 16.41 )
STAPHYLOCOCCAL ABSCESS	INFECTIONS AND INFESTATIONS	1	7.55 ( 1.05 - 54.27 )	7.55 ( 5.61 )
HIDRADENITIS	SKIN AND SUBCUTANEOUS TISSUE DISORDERS	1	2.64 ( 0.37 - 18.81 )	2.64 ( 1.01 )
BLOOD PRESSURE SYSTOLIC INCREASED	INVESTIGATIONS	1	0.2 ( 0.03 - 1.42 )	0.2 ( 3.2 )

## Sheet: Sheet2
									Journal name:Naunyn-Schmiedeberg's Archives of Pharmacology
									Article title:Systematic analysis of adverse reaction signals induced by Leflunomide, Upadacitinib, and Baricitinib in the treatment of rheumatoid arthritis using the FAERS database
									Author names:Jizheng Danga,Li Shua*
									aDepartment of Pharmacy, University-Town Hospital of Chongqing Medical University, Chongqing, China
									E-mail addresses: 800321@hospital.cqmu.edu.cn (Jizheng Dang), shuli1986@hospital.cqmu.edu.cn (Li Shu).
									Corresponding Author:Li Shu
									E-mail addresses:shuli1986@hospital.cqmu.edu.cn
