# Supplementary material for: Systematic analysis of adverse reaction signals induced by Leflunomide, Upadacitinib, and Baricitinib in the treatment of rheumatoid arthritis using the FAERS database
Source: Research Square preprint supplement (doi:10.21203/rs.3.rs-7331453/v1), 2025-08-21
Supplement: Supplementary file 7 [file c22d5cb457d368579c32af8b.docx]

**Journal name:Naunyn-Schmiedeberg's Archives of Pharmacology**

**Article title:Systematic analysis of adverse reaction signals induced by Leflunomide, Upadacitinib, and Baricitinib in the treatment of rheumatoid arthritis using the FAERS database**

Author names:Jizheng Danga,Li Shua*

aDepartment of Pharmacy, University-Town Hospital of Chongqing Medical University, Chongqing, China

E-mail addresses: 800321@hospital.cqmu.edu.cn (Jizheng Dang), shuli1986@hospital.cqmu.edu.cn (Li Shu).

Corresponding Author:Li Shu

1. mail addresses:shuli1986@hospital.cqmu.edu.cn

**Online Resource 1 computational formula**

| Method | Formula | Threshold |
| --- | --- | --- |
| ROR |  |  |
|  |  |  |
|  |  |  |
| PRR |  | and |
|  |  |  |
|  |  |  |
| BCPNN |  |  |
|  |  |  |
|  |  |  |
|  |  |  |
|  |  |  |
| MGPS |  |  |
