# Supplementary material for: Systematic analysis of adverse reaction signals induced by Leflunomide, Upadacitinib, and Baricitinib in the treatment of rheumatoid arthritis using the FAERS database
Source: Research Square preprint supplement (doi:10.21203/rs.3.rs-7331453/v1), 2025-08-21
Supplement: Supplementary file 8 [file f58402afc824b5e5a91d864a.xlsx]

## Sheet: Sheet 1
soc_name_en	ac	n	a	b	c	d	ROR	RORL	RORU	PRR	PRRL	PRRU	XX	EBGM	EBGM05	IC	GMAE	EIC	VIC	SD	BCPNN250	IC025	ROR(95%Cl)	PRR(Chi-square value)	EBGM(EBGM05)	IC(IC025)	Determine whether it is a positive signal according to the ROR algorithm(lower limit of 95% CI>1, a≥3)	Determine whether it is a positive signal according to the PRR algorithm(PRR≥2, χ2≥4, a≥3)	Determine whether it is a positive signal according to the MGPS algorithm(EBGM05>2)	Determine whether it is a positive signal according to the BCPNN algorithm(IC025>0)
INFECTIONS AND INFESTATIONS	325864	3359129	10844	72132	315020	2961133	1.41	1.38	1.44	1.36	1.34	1.38	1101.7	1.35	1.32	0.43	417.31	0.429882	0.000221532	0.0148839	0.400114	0.4	1.41 ( 1.38 - 1.44 )	1.36 ( 1101.7 )	1.35 ( 1.32 )	0.43 ( 0.4 )	yes	no	no	yes
CARDIAC DISORDERS	51085	3359129	1392	81584	49693	3226460	1.11	1.05	1.17	1.11	1.05	1.16	13.97	1.1	1.05	0.14	2661.92	0.14143	0.00155813	0.0394732	0.0624837	0.06	1.11 ( 1.05 - 1.17 )	1.11 ( 13.97 )	1.1 ( 1.05 )	0.14 ( 0.06 )	yes	no	no	yes
RESPIRATORY, THORACIC AND MEDIASTINAL DISORDERS	159768	3359129	3650	79326	156118	3120035	0.92	0.89	0.95	0.92	0.89	0.96	23.99	0.92	0.9	-0.11	851.145	-0.112684	0.000606334	0.0246239	-0.161932	-0.16	0.92 ( 0.89 - 0.95 )	0.92 ( 23.99 )	0.92 ( 0.9 )	-0.11 ( -0.16 )	no	no	no	no
INJURY, POISONING AND PROCEDURAL COMPLICATIONS	266501	3359129	5786	77190	260715	3015438	0.87	0.84	0.89	0.88	0.85	0.9	107.46	0.88	0.86	-0.19	510.265	-0.186172	0.000390698	0.0197661	-0.225705	-0.23	0.87 ( 0.84 - 0.89 )	0.88 ( 107.46 )	0.88 ( 0.86 )	-0.19 ( -0.23 )	no	no	no	no
BLOOD AND LYMPHATIC SYSTEM DISORDERS	28505	3359129	493	82483	28012	3248141	0.69	0.63	0.76	0.69	0.61	0.78	65.46	0.7	0.65	-0.51	4770.46	-0.513425	0.00430954	0.0656471	-0.644719	-0.65	0.69 ( 0.63 - 0.76 )	0.69 ( 65.46 )	0.7 ( 0.65 )	-0.51 ( -0.65 )	no	no	no	no
NEOPLASMS BENIGN, MALIGNANT AND UNSPECIFIED (INCL CYSTS AND POLYPS)	58326	3359129	2027	80949	56299	3219854	1.43	1.37	1.5	1.42	1.38	1.47	248.91	1.41	1.36	0.49	2331.45	0.492198	0.00108523	0.0329428	0.426313	0.43	1.43 ( 1.37 - 1.5 )	1.42 ( 248.91 )	1.41 ( 1.36 )	0.49 ( 0.43 )	yes	no	no	yes
MUSCULOSKELETAL AND CONNECTIVE TISSUE DISORDERS	494334	3359129	14111	68865	480223	2795930	1.19	1.17	1.22	1.16	1.14	1.18	355.48	1.16	1.14	0.21	275.09	0.208621	0.000174925	0.0132259	0.182169	0.18	1.19 ( 1.17 - 1.22 )	1.16 ( 355.48 )	1.16 ( 1.14 )	0.21 ( 0.18 )	yes	no	no	yes
NERVOUS SYSTEM DISORDERS	170078	3359129	4764	78212	165314	3110839	1.15	1.11	1.18	1.14	1.11	1.17	81.42	1.13	1.11	0.18	799.55	0.181305	0.000472266	0.0217317	0.137842	0.14	1.15 ( 1.11 - 1.18 )	1.14 ( 81.42 )	1.13 ( 1.11 )	0.18 ( 0.14 )	yes	no	no	yes
GENERAL DISORDERS AND ADMINISTRATION SITE CONDITIONS	785303	3359129	13418	69558	771885	2504268	0.63	0.61	0.64	0.69	0.67	0.7	2467.11	0.69	0.68	-0.53	173.164	-0.531743	0.000180981	0.0134529	-0.558649	-0.56	0.63 ( 0.61 - 0.64 )	0.69 ( 2467.11 )	0.69 ( 0.68 )	-0.53 ( -0.56 )	no	no	no	no
EYE DISORDERS	45913	3359129	1537	81439	44376	3231777	1.37	1.31	1.45	1.37	1.32	1.42	148.77	1.36	1.3	0.44	2961.77	0.438155	0.00142185	0.0377075	0.36274	0.36	1.37 ( 1.31 - 1.45 )	1.37 ( 148.77 )	1.36 ( 1.3 )	0.44 ( 0.36 )	yes	no	no	yes
VASCULAR DISORDERS	52179	3359129	1379	81597	50800	3225353	1.07	1.02	1.13	1.07	1.02	1.12	6.56	1.07	1.02	0.1	2606.11	0.097358	0.00157135	0.0396403	0.0180774	0.02	1.07 ( 1.02 - 1.13 )	1.07 ( 6.56 )	1.07 ( 1.02 )	0.1 ( 0.02 )	yes	no	no	yes
GASTROINTESTINAL DISORDERS	218894	3359129	4261	78715	214633	3061520	0.77	0.75	0.8	0.78	0.75	0.81	266.42	0.79	0.77	-0.34	621.241	-0.343598	0.000521088	0.0228274	-0.389252	-0.39	0.77 ( 0.75 - 0.8 )	0.78 ( 266.42 )	0.79 ( 0.77 )	-0.34 ( -0.39 )	no	no	no	no
PSYCHIATRIC DISORDERS	69732	3359129	1291	81685	68441	3207712	0.74	0.7	0.78	0.74	0.69	0.8	113.18	0.75	0.72	-0.42	1950.1	-0.415767	0.00166404	0.0407926	-0.497353	-0.5	0.74 ( 0.7 - 0.78 )	0.74 ( 113.18 )	0.75 ( 0.72 )	-0.42 ( -0.5 )	no	no	no	no
SKIN AND SUBCUTANEOUS TISSUE DISORDERS	166592	3359129	2433	80543	164159	3111994	0.57	0.55	0.6	0.59	0.55	0.62	741.78	0.59	0.57	-0.76	816.28	-0.757972	0.000890841	0.029847	-0.817666	-0.82	0.57 ( 0.55 - 0.6 )	0.59 ( 741.78 )	0.59 ( 0.57 )	-0.76 ( -0.82 )	no	no	no	no
SURGICAL AND MEDICAL PROCEDURES	68583	3359129	7022	75954	61561	3214592	4.83	4.71	4.95	4.5	4.48	4.53	17538.4	4.14	4.06	2.05	1982.77	2.05067	0.000349937	0.0187066	2.01326	2.01	4.83 ( 4.71 - 4.95 )	4.5 ( 17538.36 )	4.14 ( 4.06 )	2.05 ( 2.01 )	yes	yes	yes	yes
INVESTIGATIONS	182429	3359129	4116	78860	178313	3097840	0.91	0.88	0.94	0.91	0.88	0.94	36.65	0.91	0.89	-0.13	745.418	-0.130692	0.000540189	0.023242	-0.177176	-0.18	0.91 ( 0.88 - 0.94 )	0.91 ( 36.65 )	0.91 ( 0.89 )	-0.13 ( -0.18 )	no	no	no	no
REPRODUCTIVE SYSTEM AND BREAST DISORDERS	10830	3359129	279	82697	10551	3265602	1.04	0.93	1.18	1.04	0.93	1.16	0.51	1.04	0.94	0.06	12555.3	0.0602555	0.00764885	0.0874577	-0.11466	-0.11	1.04 ( 0.93 - 1.18 )	1.04 ( 0.51 )	1.04 ( 0.94 )	0.06 ( -0.11 )	no	no	no	no
METABOLISM AND NUTRITION DISORDERS	36567	3359129	880	82096	35687	3240466	0.97	0.91	1.04	0.97	0.91	1.04	0.62	0.97	0.92	-0.04	3718.73	-0.0376585	0.00244265	0.0494232	-0.136505	-0.14	0.97 ( 0.91 - 1.04 )	0.97 ( 0.62 )	0.97 ( 0.92 )	-0.04 ( -0.14 )	no	no	no	no
RENAL AND URINARY DISORDERS	29096	3359129	908	82068	28188	3247965	1.27	1.19	1.36	1.27	1.21	1.34	51.56	1.26	1.2	0.34	4673.56	0.336781	0.00238449	0.0488313	0.239119	0.24	1.27 ( 1.19 - 1.36 )	1.27 ( 51.56 )	1.26 ( 1.2 )	0.34 ( 0.24 )	yes	no	no	yes
IMMUNE SYSTEM DISORDERS	46720	3359129	477	82499	46243	3229910	0.4	0.37	0.44	0.41	0.32	0.5	413.02	0.41	0.38	-1.27	2910.61	-1.27293	0.0044221	0.0664989	-1.40593	-1.41	0.4 ( 0.37 - 0.44 )	0.41 ( 413.02 )	0.41 ( 0.38 )	-1.27 ( -1.41 )	no	no	no	no
HEPATOBILIARY DISORDERS	24495	3359129	467	82509	24028	3252125	0.77	0.7	0.84	0.77	0.68	0.86	32.54	0.77	0.71	-0.37	5551.38	-0.373043	0.00455556	0.0674949	-0.508032	-0.51	0.77 ( 0.7 - 0.84 )	0.77 ( 32.54 )	0.77 ( 0.71 )	-0.37 ( -0.51 )	no	no	no	no
EAR AND LABYRINTH DISORDERS	13889	3359129	356	82620	13533	3262620	1.04	0.93	1.15	1.04	0.93	1.14	0.5	1.04	0.95	0.05	9790.25	0.0530562	0.00600324	0.0774806	-0.101905	-0.1	1.04 ( 0.93 - 1.15 )	1.04 ( 0.5 )	1.04 ( 0.95 )	0.05 ( -0.1 )	no	no	no	no
SOCIAL CIRCUMSTANCES	16575	3359129	773	82203	15802	3260351	1.94	1.8	2.09	1.93	1.86	2	332.67	1.89	1.78	0.92	8203.83	0.915096	0.0028379	0.0532719	0.808552	0.81	1.94 ( 1.8 - 2.09 )	1.93 ( 332.67 )	1.89 ( 1.78 )	0.92 ( 0.81 )	yes	no	no	yes
PRODUCT ISSUES	23456	3359129	117	82859	23339	3252814	0.2	0.16	0.24	0.2	0.02	0.38	381.03	0.2	0.17	-2.31	5797.27	-2.29834	0.0177507	0.133232	-2.56481	-2.57	0.2 ( 0.16 - 0.24 )	0.2 ( 381.03 )	0.2 ( 0.17 )	-2.31 ( -2.57 )	no	no	no	no
PREGNANCY, PUERPERIUM AND PERINATAL CONDITIONS	6389	3359129	38	82938	6351	3269802	0.24	0.17	0.32	0.24	-0.08	0.56	93.45	0.24	0.18	-2.05	21281.2	-2.02608	0.0537174	0.23177	-2.48962	-2.52	0.24 ( 0.17 - 0.32 )	0.24 ( 93.45 )	0.24 ( 0.18 )	-2.05 ( -2.52 )	no	no	no	no
ENDOCRINE DISORDERS	4948	3359129	107	82869	4841	3271312	0.87	0.72	1.06	0.87	0.68	1.06	1.95	0.88	0.75	-0.19	27477.6	-0.190553	0.0197157	0.140413	-0.471379	-0.47	0.87 ( 0.72 - 1.06 )	0.87 ( 1.95 )	0.88 ( 0.75 )	-0.19 ( -0.47 )	no	no	no	no
CONGENITAL, FAMILIAL AND GENETIC DISORDERS	2078	3359129	50	82926	2028	3274125	0.97	0.74	1.29	0.97	0.69	1.25	0.04	0.97	0.77	-0.04	65409.6	-0.0378375	0.0418355	0.204537	-0.446912	-0.45	0.97 ( 0.74 - 1.29 )	0.97 ( 0.04 )	0.97 ( 0.77 )	-0.04 ( -0.45 )	no	no	no	no

## Sheet: Sheet2
soc_name	Case number	χ2	ROR(95%Cl)	PRR(95%Cl)	EBGM(EBGM05)	IC(IC025)	Determine whether it is a positive signal according to the ROR algorithm(lower limit of 95% CI>1, a≥3)	Determine whether it is a positive signal according to the PRR algorithm(PRR≥2, χ2≥4, a≥3)	Determine whether it is a positive signal according to the MGPS algorithm(EBGM05>2)	Determine whether it is a positive signal according to the BCPNN algorithm(IC025>0)
INFECTIONS AND INFESTATIONS	10844	1101.7	1.41 ( 1.38 - 1.44 )	1.36 ( 1101.7 )	1.35 ( 1.32 )	0.43 ( 0.4 )	yes	no	no	yes
CARDIAC DISORDERS	1392	13.97	1.11 ( 1.05 - 1.17 )	1.11 ( 13.97 )	1.1 ( 1.05 )	0.14 ( 0.06 )	yes	no	no	yes
RESPIRATORY, THORACIC AND MEDIASTINAL DISORDERS	3650	23.99	0.92 ( 0.89 - 0.95 )	0.92 ( 23.99 )	0.92 ( 0.9 )	-0.11 ( -0.16 )	no	no	no	no
INJURY, POISONING AND PROCEDURAL COMPLICATIONS	5786	107.46	0.87 ( 0.84 - 0.89 )	0.88 ( 107.46 )	0.88 ( 0.86 )	-0.19 ( -0.23 )	no	no	no	no
BLOOD AND LYMPHATIC SYSTEM DISORDERS	493	65.46	0.69 ( 0.63 - 0.76 )	0.69 ( 65.46 )	0.7 ( 0.65 )	-0.51 ( -0.65 )	no	no	no	no
NEOPLASMS BENIGN, MALIGNANT AND UNSPECIFIED (INCL CYSTS AND POLYPS)	2027	248.91	1.43 ( 1.37 - 1.5 )	1.42 ( 248.91 )	1.41 ( 1.36 )	0.49 ( 0.43 )	yes	no	no	yes
MUSCULOSKELETAL AND CONNECTIVE TISSUE DISORDERS	14111	355.48	1.19 ( 1.17 - 1.22 )	1.16 ( 355.48 )	1.16 ( 1.14 )	0.21 ( 0.18 )	yes	no	no	yes
NERVOUS SYSTEM DISORDERS	4764	81.42	1.15 ( 1.11 - 1.18 )	1.14 ( 81.42 )	1.13 ( 1.11 )	0.18 ( 0.14 )	yes	no	no	yes
GENERAL DISORDERS AND ADMINISTRATION SITE CONDITIONS	13418	2467.11	0.63 ( 0.61 - 0.64 )	0.69 ( 2467.11 )	0.69 ( 0.68 )	-0.53 ( -0.56 )	no	no	no	no
EYE DISORDERS	1537	148.77	1.37 ( 1.31 - 1.45 )	1.37 ( 148.77 )	1.36 ( 1.3 )	0.44 ( 0.36 )	yes	no	no	yes
VASCULAR DISORDERS	1379	6.56	1.07 ( 1.02 - 1.13 )	1.07 ( 6.56 )	1.07 ( 1.02 )	0.1 ( 0.02 )	yes	no	no	yes
GASTROINTESTINAL DISORDERS	4261	266.42	0.77 ( 0.75 - 0.8 )	0.78 ( 266.42 )	0.79 ( 0.77 )	-0.34 ( -0.39 )	no	no	no	no
PSYCHIATRIC DISORDERS	1291	113.18	0.74 ( 0.7 - 0.78 )	0.74 ( 113.18 )	0.75 ( 0.72 )	-0.42 ( -0.5 )	no	no	no	no
SKIN AND SUBCUTANEOUS TISSUE DISORDERS	2433	741.78	0.57 ( 0.55 - 0.6 )	0.59 ( 741.78 )	0.59 ( 0.57 )	-0.76 ( -0.82 )	no	no	no	no
SURGICAL AND MEDICAL PROCEDURES	7022	17538.4	4.83 ( 4.71 - 4.95 )	4.5 ( 17538.36 )	4.14 ( 4.06 )	2.05 ( 2.01 )	yes	yes	yes	yes
INVESTIGATIONS	4116	36.65	0.91 ( 0.88 - 0.94 )	0.91 ( 36.65 )	0.91 ( 0.89 )	-0.13 ( -0.18 )	no	no	no	no
REPRODUCTIVE SYSTEM AND BREAST DISORDERS	279	0.51	1.04 ( 0.93 - 1.18 )	1.04 ( 0.51 )	1.04 ( 0.94 )	0.06 ( -0.11 )	no	no	no	no
METABOLISM AND NUTRITION DISORDERS	880	0.62	0.97 ( 0.91 - 1.04 )	0.97 ( 0.62 )	0.97 ( 0.92 )	-0.04 ( -0.14 )	no	no	no	no
RENAL AND URINARY DISORDERS	908	51.56	1.27 ( 1.19 - 1.36 )	1.27 ( 51.56 )	1.26 ( 1.2 )	0.34 ( 0.24 )	yes	no	no	yes
IMMUNE SYSTEM DISORDERS	477	413.02	0.4 ( 0.37 - 0.44 )	0.41 ( 413.02 )	0.41 ( 0.38 )	-1.27 ( -1.41 )	no	no	no	no
HEPATOBILIARY DISORDERS	467	32.54	0.77 ( 0.7 - 0.84 )	0.77 ( 32.54 )	0.77 ( 0.71 )	-0.37 ( -0.51 )	no	no	no	no
EAR AND LABYRINTH DISORDERS	356	0.5	1.04 ( 0.93 - 1.15 )	1.04 ( 0.5 )	1.04 ( 0.95 )	0.05 ( -0.1 )	no	no	no	no
SOCIAL CIRCUMSTANCES	773	332.67	1.94 ( 1.8 - 2.09 )	1.93 ( 332.67 )	1.89 ( 1.78 )	0.92 ( 0.81 )	yes	no	no	yes
PRODUCT ISSUES	117	381.03	0.2 ( 0.16 - 0.24 )	0.2 ( 381.03 )	0.2 ( 0.17 )	-2.31 ( -2.57 )	no	no	no	no
PREGNANCY, PUERPERIUM AND PERINATAL CONDITIONS	38	93.45	0.24 ( 0.17 - 0.32 )	0.24 ( 93.45 )	0.24 ( 0.18 )	-2.05 ( -2.52 )	no	no	no	no
ENDOCRINE DISORDERS	107	1.95	0.87 ( 0.72 - 1.06 )	0.87 ( 1.95 )	0.88 ( 0.75 )	-0.19 ( -0.47 )	no	no	no	no
CONGENITAL, FAMILIAL AND GENETIC DISORDERS	50	0.04	0.97 ( 0.74 - 1.29 )	0.97 ( 0.04 )	0.97 ( 0.77 )	-0.04 ( -0.45 )	no	no	no	no

## Sheet: Sheet3
									Journal name:Naunyn-Schmiedeberg's Archives of Pharmacology
									Article title:Systematic analysis of adverse reaction signals induced by Leflunomide, Upadacitinib, and Baricitinib in the treatment of rheumatoid arthritis using the FAERS database
									Author names:Jizheng Danga,Li Shua*
									aDepartment of Pharmacy, University-Town Hospital of Chongqing Medical University, Chongqing, China
									E-mail addresses: 800321@hospital.cqmu.edu.cn (Jizheng Dang), shuli1986@hospital.cqmu.edu.cn (Li Shu).
									Corresponding Author:Li Shu
									E-mail addresses:shuli1986@hospital.cqmu.edu.cn
